# Supplementary material for: Enantioselective Cu-catalyzed double hydroboration of alkynes to access chiral gem-diborylalkanes
Source: PubMed Central journal article supplement (PMC9209482; doi:10.1038/s41467-022-31234-2), 2022-06-20
Supplement: 41467_2022_31234_MOESM1_ESM.pdf [file 41467_2022_31234_MOESM1_ESM.pdf]

# **Supplementary Information**

## **Enantioselective Cu-catalyzed double hydroboration of alkynes to access chiral gem-diborylalkanes**

Q. Song et al

## Table of Contents

|                                                                                    |     |
|------------------------------------------------------------------------------------|-----|
| 1. Supplementary Methods.....                                                      | 3   |
| 1.1 General information.....                                                       | 3   |
| 2. Supplementary Discussion.....                                                   | 4   |
| 2.1 Optimization of the reaction condition for racemic gem-diborylalkanes.....     | 4   |
| 2.2 Optimization of the reaction conditions for asymmetric gem-diborylalkanes..... | 6   |
| 2.3 General Process for the Synthesis gem-Diborylalkanes.....                      | 11  |
| 3. Supplementary Notes.....                                                        | 13  |
| 3.1 Mechanism Studies.....                                                         | 13  |
| 3.2. <sup>31</sup> P NMR Studies.....                                              | 16  |
| 3.3 Crystal Data of <b>4</b> , <b>59</b> and <b>89</b> .....                       | 18  |
| 3.4 Characterization Data .....                                                    | 21  |
| 3.5 DFT Data.....                                                                  | 57  |
| 4. Supplementary Figures.....                                                      | 58  |
| 4.1. NMR Spectroscopic Data.....                                                   | 58  |
| 4.2. Chiral HPLC charts.....                                                       | 195 |
| 5. Supplementary References.....                                                   | 222 |

## 1. Supplementary Methods

### 1.1 General information

All reagents and solvents were purchased from Adamas Reagent, Energy Chemical Company, Bide Pharmatech Ltd., and Tansoole, and were used without further purification. Unless otherwise stated, all reactions were accomplished in Schlenk tubes under N<sub>2</sub> atmosphere. The reactions were monitored by thin layer chromatography (TLC) or gas chromatography-mass spectrometry (GC-MS). Flash column chromatography was performed over silica gel (200–300 mesh). <sup>1</sup>H NMR spectra were recorded on a Bruker Avance III 500 MHz (or 400 MHz) NMR spectrometer, and the chemical shifts (in ppm) were referred to CDCl<sub>3</sub> (δ = 7.26 ppm) as an internal standard. <sup>13</sup>C NMR spectra were obtained by using the same NMR spectrometer and were calibrated with CDCl<sub>3</sub> (δ = 77.0 ppm). <sup>11</sup>B NMR spectra were acquired with accessories on the same NMR spectrometer using CDCl<sub>3</sub>. <sup>19</sup>F NMR spectra were acquired with accessories on the same NMR spectrometer using CDCl<sub>3</sub>, too. The following abbreviations were used to illuminate the diversities: δ = chemical shifts, *J* = coupling constant, s = singlet, d = doublet, t = triplet, q = quartet, m = multiplet. High-resolution mass spectra (HRMS; (ESI)) were acquired with quadrupole and time-of-flight (TOF) mass spectrometers. All reagents and solvents were obtained from commercial suppliers and used without further purification. Reactions were monitored by thin-layer chromatography (TLC). The products were purified by column chromatography on silica gel using petroleum ether and ethyl acetate as the eluent. Analytical chiral HPLC was performed on an Agilent 1600 Infinity instrument with Daicel Chiralcel OD-H column, or Daicel Chiralpak AD-H, IA-3, IC-3 columns. Optical rotations were measured on an Aton Paar MCP 150 polarimeter.

## 2. Supplementary Discussion

### 2.1 Optimization of the racemic gem-diborylalkanes reaction condition

**Supplementary Table 1 Catalysis Screening.** Changing the catalysis with other parameters as the same.

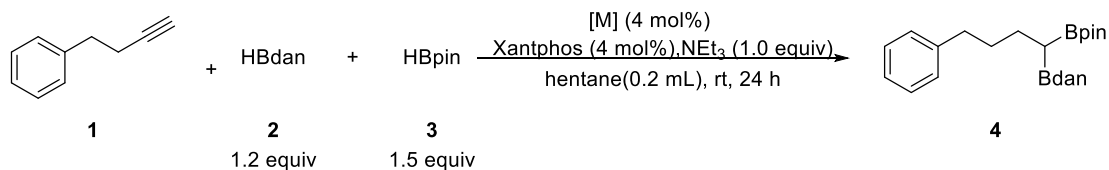

| Entry | [M] (4.0 mol%)                       | Yield |
|-------|--------------------------------------|-------|
| 1     | Co(acac) <sub>2</sub>                | 68    |
| 2     | Co(acac) <sub>3</sub>                | 63    |
| 3     | Cu(acac) <sub>2</sub>                | 60    |
| 4     | Co <sub>2</sub> (CO) <sub>8</sub>    | N.D.  |
| 5     | Cobalt bis(2-ethylhexanoate)         | N.D.  |
| 6     | CoC                                  | N.D.  |
| 7     | Co(TMHD) <sub>3</sub>                | N.D.  |
| 8     | Co <sub>2</sub> CO <sub>3</sub>      | N.D.  |
| 9     | Co(acacF <sub>6</sub> ) <sub>2</sub> | 50    |
| 10    | Dicarbonylcyclopentadienylcobalt     | N.D.  |

**Supplementary Table 2 Ligand evaluations.** Changing ligands with other parameters as the same.

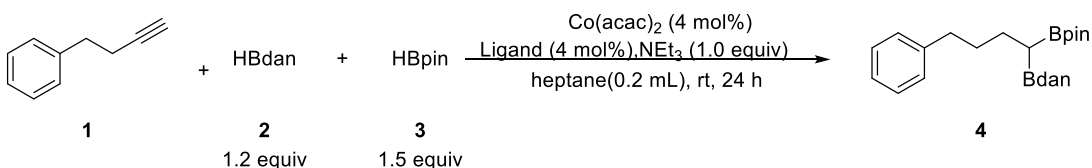

| Entry | Ligand                         | Yield (%) |
|-------|--------------------------------|-----------|
| 1     | 2,2'-Bipyridine                | N.D.      |
| 2     | 1,10-Phen                      | N.D.      |
| 3     | PPh <sub>3</sub>               | 12        |
| 4     | PPh <sub>3</sub> O             | trace     |
| 5     | P(OMe) <sub>3</sub>            | N.D.      |
| 6     | P <sup>t</sup> Bu <sub>3</sub> | 15        |
| 7     | PPh <sub>2</sub> O             | trace     |
| 8     | Xantphos                       | 68        |



**Supplementary Table 3 Additive examinations.** Changing additives with other parameters as the same.

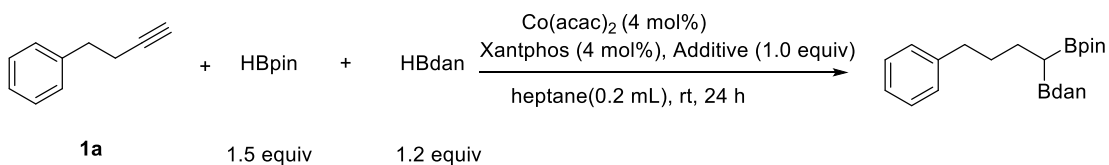

| Entry | Additive (1.0 equiv)           | Yield (%) |
|-------|--------------------------------|-----------|
| 1     | Morpholine                     | 16        |
| 2     | Quinoline                      | <10       |
| 3     | Pyridine                       | 43        |
| 4     | HNEt <sub>2</sub>              | 67        |
| 5     | NEt <sub>3</sub>               | 68        |
| 6     | N,N-Diethylaniline             | 65        |
| 7     | Cyclohexylamine                | 52        |
| 8     | N <sup>t</sup> Bu <sub>3</sub> | 67        |
| 9     | N <sup>i</sup> Pr <sub>3</sub> | 35        |
| 10    | 2,6-Lutidine                   | 66        |
| 11    | NEt <sub>3</sub> (3.0)         | 70        |
| 12    | NEt <sub>3</sub> (5.0)         | 35        |
| 13    | NEt <sub>3</sub> (0.5)         | 57        |

**Supplementary Table 4 Solvent screening.** Changing solvents with other parameters as the same.

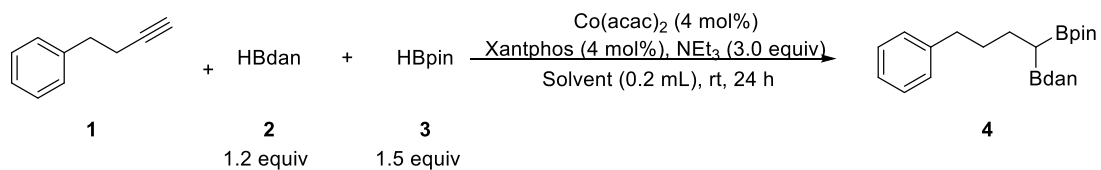

| Entry | Solvent (0.2 mL)     | Yield (%) |
|-------|----------------------|-----------|
| 1     | THF                  | 17        |
| 2     | Toluene              | trace     |
| 3     | Et <sub>2</sub> O    | 16        |
| 4     | 1,4-dioxane          | 30        |
| 5     | n-hexane             | 42        |
| 6     | n-octane             | 62        |
| 7     | heptane              | 70        |
| 8     | pentane              | 59        |
| 9     | Cyclopentane         | 52        |
| 10    | Cyclohexane          | 76        |
| 11    | Cycloheptane         | 65        |
| 12    | Cyclooctane          | 67        |
| 10    | Cyclohexane (1.0 mL) | 70        |

**Supplementary Table 5 Adding time of HBpin.** Testing the reactions with different adding time of HBpin.

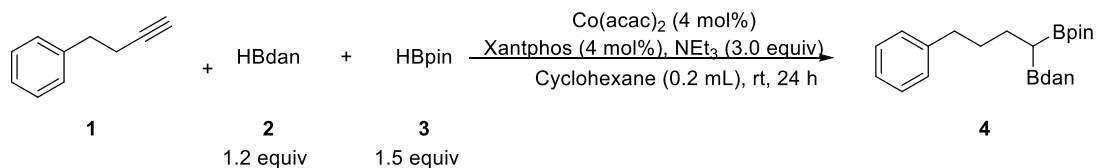

| Entry | variation from standard conditions    | Yield (%) |
|-------|---------------------------------------|-----------|
| 1     | HBpin added together with 1 and HBdan | 65        |
| 2     | HBpin added after 8min                | 70        |
| 3     | HBpin added after 15 min              | 76        |
| 4     | HBpin added after 20 min              | 73        |

**2.2 Optimization of the reaction conditions for chiral gem-diborylalkanes**

**Supplementary Table 6 Chiral ligand evaluations.** Changing chiral ligands with other parameters as the same.

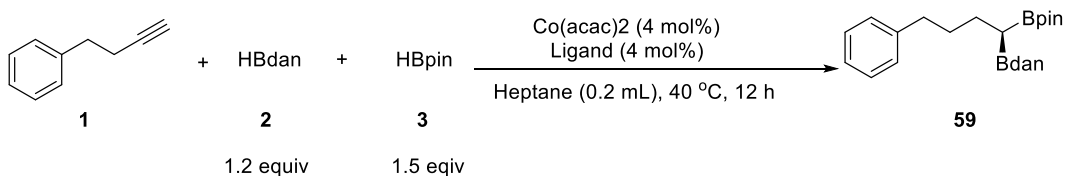

| Entry | Ligand               | Yield (%) | er (%)    |
|-------|----------------------|-----------|-----------|
| 1     | (R)-binap            | 13        | 53:47     |
| 2     | (R)-Tol-binap        | <5        | 40:60     |
| 3     | (R)-Xyl-binap        | 48        | 45:55     |
| 4     | (S)-Segphos          | 8         | 55:45     |
| 5     | (S)-DM-Segphos       | 8         | 40:60     |
| 6     | (S)-DTBM-Segphos     | 24        | 40.5:59.5 |
| 7     | (R,S)-josiphos       | <5        | —         |
| 8     | (R)-(R)-Walphos      | 43        | 23:77     |
| 9     | (S)-Sunphos          | 26        | 44.5:55.5 |
| 10    | (R)-Difluorophos(TM) | trace     | —         |

**Supplementary Table 7 Catalysis examinations.** Changing the catalysis with other parameters as the same.

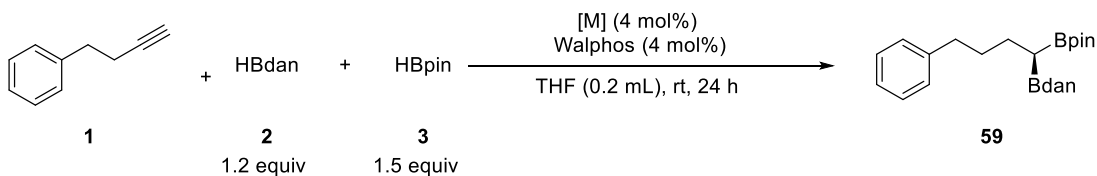

| Entry | [M] (4.0 mol%)        | Yield (%) | er (%) |
|-------|-----------------------|-----------|--------|
| 1     | Co(acac) <sub>2</sub> | 33        | 39:61  |
| 6     | Co(acac) <sub>3</sub> | 28        | 35:65  |
| 7     | Cu(acac) <sub>2</sub> | 20        | 76:24  |

**Supplementary Table 8 Chiral ligand evaluations.** Changing chiral ligands with other parameters as the same.

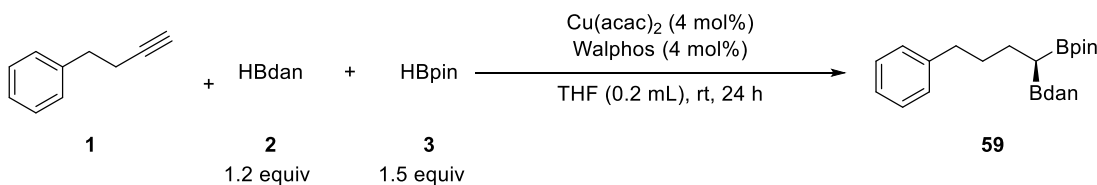

| Entry | Ligand             | Yield (%) | er    |
|-------|--------------------|-----------|-------|
| 1     | (R)-tol-binap      | 15        | 45:55 |
| 2     | (R)-xyl-binap      | 12        | 42:58 |
| 3     | (R)-DM-Segphos     | 13        | 48:52 |
| 4     | (R)-Segphos        | 14        | 47:53 |
| 5     | (S,S)-Ph-BPE       | 8         | 56:44 |
| 6     | (R,R)-BDDP         | 20        | 64:36 |
| 7     | (R,R)-quinoxP*     | 16        | 34:66 |
| 8     | (S)-Sunphos        | 43        | 74:26 |
| 9     | (R)-Difluorduphos  | 9         | 61:39 |
| 10    | (R,R)-Me-ferrocene | —         | —     |
| 11    | (R)-DTBM-MeOBiphep | 8         | 37:63 |
| 12    | (R,R)-Me-duphos    | —         | —     |
| 13    | (R,S)-josiphos     | 25        | 32:68 |
| 14    | (R)-(R)-Walphos    | 20        | 76:24 |

**Supplementary Table 9 Solvent screening.** Changing solvents with other parameters as the same.

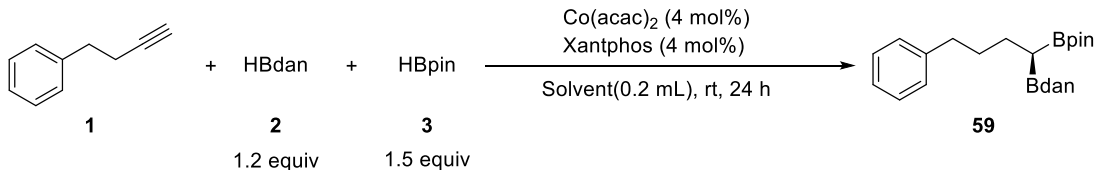

| Entry | Solvent (0.2 mL)     | Yield (%) | er        |
|-------|----------------------|-----------|-----------|
| 1     | THF                  | 20        | 76:24     |
| 2     | Toluene              | 28        | 82:18     |
| 3     | Et <sub>2</sub> O    | 30        | 78:22     |
| 4     | 1,4-dioxane          | 32        | 83:17     |
| 5     | Pentane              | 25        | 82.5:17.5 |
| 6     | Hexane               | 30        | 80:20     |
| 7     | n-octane             | 27        | 82:18     |
| 8     | Heptane              | 32        | 83:17     |
| 9     | cyclohexane          | 33        | 87:13     |
| 10    | cyclohexane (1.0 mL) | 30        | 88:12     |

**Supplementary Table 10 Additive examinations.** Changing additives with other parameters as the same.

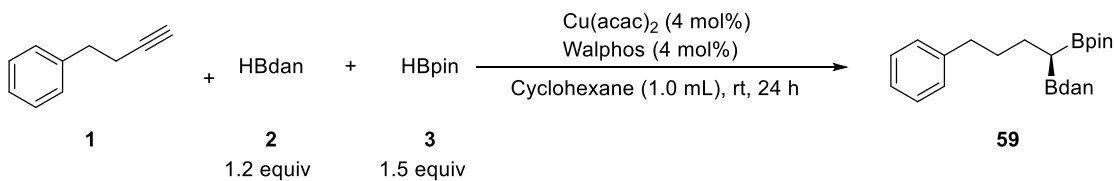

| Entry | Additive (1.0 equiv)                   | Yield (%) | er    |
|-------|----------------------------------------|-----------|-------|
| 1     | —                                      | 33        | 88:12 |
| 2     | MeOH (1.0) + NaO <sup>t</sup> Bu (2.0) | n.d.      | —     |
| 3     | (EtO) <sub>2</sub> SiMeH               | 70        | 89:11 |
| 4     | (MeO) <sub>2</sub> SiMeH               | 67        | 89:11 |
| 5     | 2,6-Lutidine                           | 43        | 86:14 |
| 6     | N <sup>i</sup> Bu <sub>3</sub>         | 13        | 49:51 |
| 7     | NEt <sub>3</sub>                       | 18        | 79:21 |
| 8     | PMHS (1.0)                             | 76        | 91:9  |
| 9     | PMHS (3.0)                             | 72        | 91:9  |

**Supplementary Table 11 The amount of PMHS.** Changing the amount of PMHS with other parameters as the same.

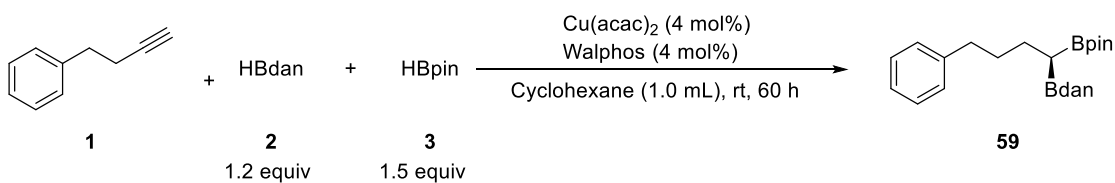

| Entry | PMHS (equiv) | Yield (%) <sup>a</sup> | Yield (%) <sup>b</sup> | er (%) |
|-------|--------------|------------------------|------------------------|--------|
| 1     | —            | 40                     | 33                     | 88:12  |
| 2     | 0.2          | 51                     | 46                     | 89:11  |
| 3     | 0.5          | 60                     | 50                     | 91:9   |
| 4     | 1.0          | 80                     | 76                     | 91:9   |
| 5     | 2.0          | 83                     | 73                     | 91:9   |
| 6     | 3.0          | 85                     | 72                     | 91:9   |

<sup>a</sup> the yield of product **59** was determined with gas chromatography (GC) analysis with Dodecane as internal standard; <sup>b</sup> isolated yield; <sup>c</sup> The enantioselectivity was determined by Chiral HPLC.

**Supplementary Table 12 The additive of PMHS and base.** Changing the additive and base with other parameters as the same.

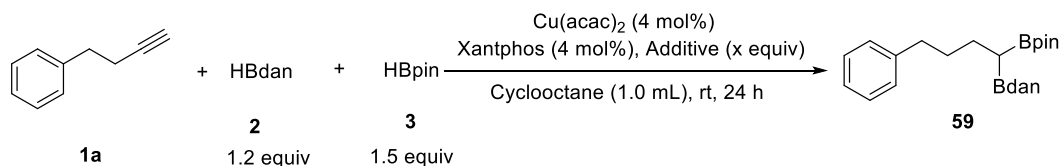

| Entry | Additive (equiv)                       | Yield (%) | er    |
|-------|----------------------------------------|-----------|-------|
| 1     | PMHS (1.0)                             | 76        | 91:9  |
| 2     | PMHS (1.0) + LiO <sup>t</sup> Bu (2.0) | 32        | 88:12 |
| 3     | PMHS (1.0) + NaO <sup>t</sup> Bu (2.0) | 10        | 54:46 |
| 4     | PMHS (1.0) + KO <sup>t</sup> Bu (2.0)  | 12        | 66:34 |
| 5     | PMHS (1.0) + LiOMe (2.0)               | 17        | 81:19 |

Isolated yield.

**Supplementary Table 13 The amount of catalysis and ligand.** Changing the amount of catalysis and ligand with other parameters as the same.

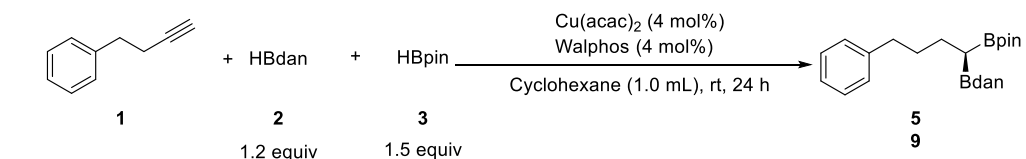

| Entry | $\text{Cu(acac)}_2$ (mol%) | Walphos (mol%) | yield (%) | er    |
|-------|----------------------------|----------------|-----------|-------|
| 1     | 4                          | 4              | 76        | 91:9  |
| 2     | 6                          | 6              | 78        | 92:8  |
| 3     | 8                          | 8              | 65        | 86:14 |
| 4     | 4                          | 6              | 52        | 77:23 |

**Supplementary Table 14 Adding sequence and spans examinations.** Changing the adding sequence and spans with other parameters as the same.

| Entry | variation from standard conditions                      | yield (%) | er    |
|-------|---------------------------------------------------------|-----------|-------|
| 1     | <b>1</b> and HBpin added after 10 min                   | 76        | 91:9  |
| 2     | <b>1</b> and HBpin added after 15 min                   | 73        | 89:11 |
| 3     | <b>1</b> and HBpin added after 20 min                   | 78        | 88:12 |
| 4     | <b>1</b> and HBpin added after 37 min                   | 80        | 85:15 |
| 5     | <b>1</b> and HBpin added after 15 min (dry Cyclooctane) | 74        | 85:15 |
| 6     | one pot                                                 | 53        | 88:12 |
| 7     | HBpin added after 10 min                                | 66        | 89:11 |

**Supplementary Table 15 Time screening.** Changing the reaction time with other parameters as the same.

| Entry | time (h) | yield (%) | er   |
|-------|----------|-----------|------|
| 1     | 24       | 78        | 92:8 |
| 2     | 36       | 77        | 92:8 |
| 3     | 48       | 76        | 92:8 |
| 4     | 60       | 78        | 94:6 |
| 5     | 72       | 78        | 92:8 |

## 2.3. General Process for the Synthesis *gem*-Diborylalkanes

### General Procedure A:

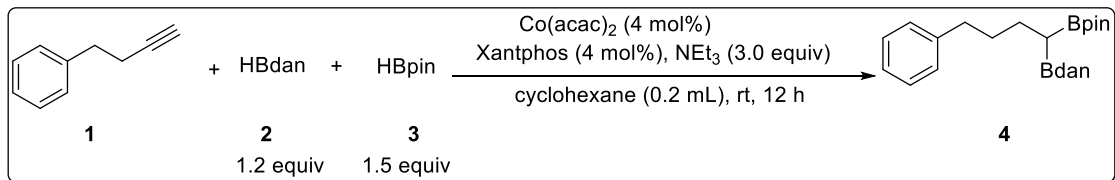

Supplementary Figure 1. Synthetic methods for *gem*-diborylalkanes

A tube was charged with Co(acac)<sub>2</sub> (4 mol%) and Xantphos (4 mol%) under N<sub>2</sub> atmosphere, then cyclohexane (0.2 mL), HBdan (0.24 mmol) and NEt<sub>3</sub> (0.6 mmol) were added subsequently. The reaction mixture was stirred at room temperature for 15 mins. Then HBpin (0.3 mmol) and **1** (0.2 mmol) were added subsequently at room temperature, then the resulting mixture was stirred at room temperature for 12 h. The residue was purified by column chromatography to afford the corresponding *gem*-diborylalkanes **4**.

### General Procedure B:

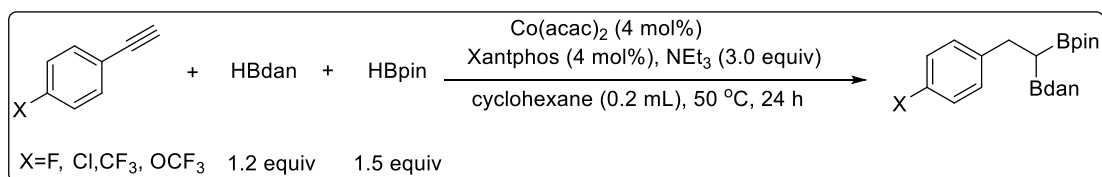

Supplementary Figure 2. Synthetic methods for *gem*-diborylalkanes

A tube was charged with Co(acac)<sub>2</sub> (4 mol%) and Xantphos (4 mol%) under N<sub>2</sub> atmosphere, then cyclohexane (0.2 mL), HBdan (0.24 mmol) and NEt<sub>3</sub> (0.6 mmol) were added subsequently. The reaction mixture was stirred at room temperature for 15 mins. Then HBpin (0.3 mmol) and Phenylacetylene containing halogen (0.2 mmol) were added subsequently at room temperature, then the resulting mixture was stirred at 50 °C for 24 h. The residue was purified by column chromatography to afford the corresponding product *gem*-diborylalkanes.

### General Procedure C:

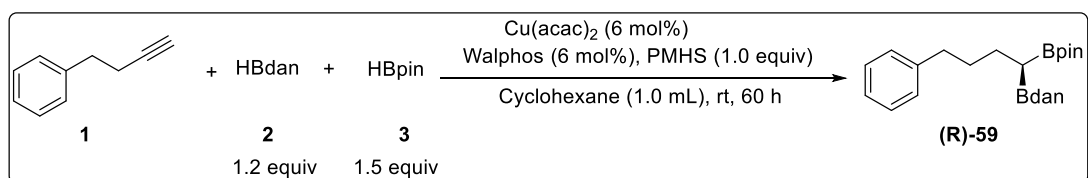

### Supplementary Figure 3. Synthetic methods for chiral gem-diborylalkanes

A tube was charged with  $\text{Cu}(\text{acac})_2$  (6 mol%) and Walphos (6 mol%) under  $\text{N}_2$  atmosphere, then cyclohexane (1.0 mL), HBdan (0.24 mmol) and PMHS (0.2 mmol) were added subsequently. The reaction mixture was stirred at room temperature for 10 mins. Then HBpin (0.3 mmol) and **1** (0.2 mmol) were added subsequently at room temperature, then the resulting mixture was stirred at ambient temperature for 60 h. The residue was purified by column chromatography to afford the corresponding product **(R)-59**.

#### General Procedure D:

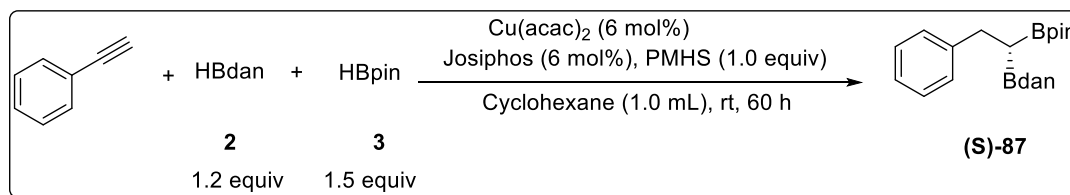

### Supplementary Figure 4. Synthetic methods for chiral gem-Diborylalkanes

A tube was charged with  $\text{Cu}(\text{acac})_2$  (6 mol%) and Josiphos (6 mol%) under  $\text{N}_2$  atmosphere, then cyclohexane (1.0 mL), HBdan (0.24 mmol) and PMHS (0.2 mmol) were added subsequently. The reaction mixture was stirred at room temperature for 10 mins. Then HBpin (0.3 mmol) and Phenylacetylene (0.2 mmol) were added subsequently at room temperature, then the resulting mixture was stirred at ambient temperature for 60 h. The residue was purified by column chromatography to afford the corresponding product **(S)-88**.

#### General Procedure E to Complex Alkynes:

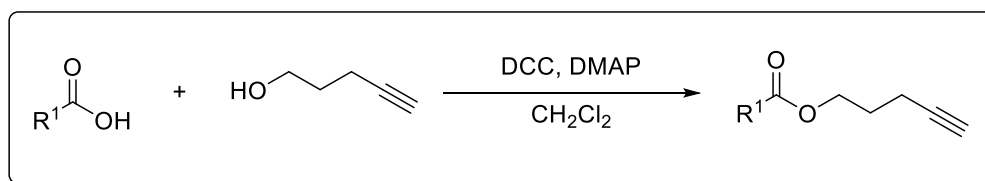

### Supplementary Figure 5. Synthetic methods for Complex Alkynes

A tube was charged with 4-Pentyn-1-ol (3.6 mmol), acid (3.6 mmol), DCC (735 mg, 3.6 mmol) and DMAP (2 mg) in dry DCM (3 mL) and the solution was stirred for 6 h at room temperature under  $\text{N}_2$  atmosphere. The reaction mixture was diluted with DCM (20 mL) and filtered. The residue was purified by column chromatography to afford the corresponding product.



### 3. Supplementary Notes

#### 3.1 Control experiments:

1)

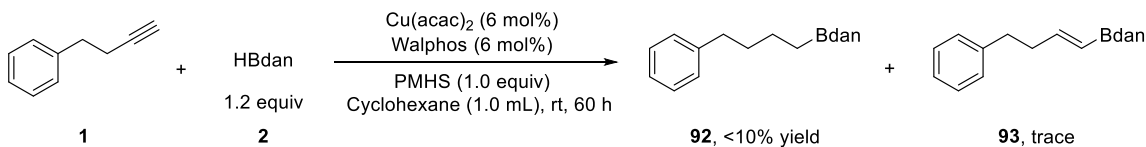

**Supplementary Figure 6. Control experiments.** **1** was exposed to HBdan in the absence of HBpin, under the standard reaction conditions.

A tube was charged with Cu(acac)<sub>2</sub> (6 mol%) and Walphos (6 mol%) under N<sub>2</sub> atmosphere, then cyclohexane (1.0 mL), HBdan (0.24 mmol), PMHS (1.0 equiv) and **1** (0.2 mmol) were added subsequently at room temperature, then the resulting mixture was stirred at ambient temperature for 60 h. The yields of products were determined with gas chromatography (GC) analysis with dodecane as internal standard.

2)

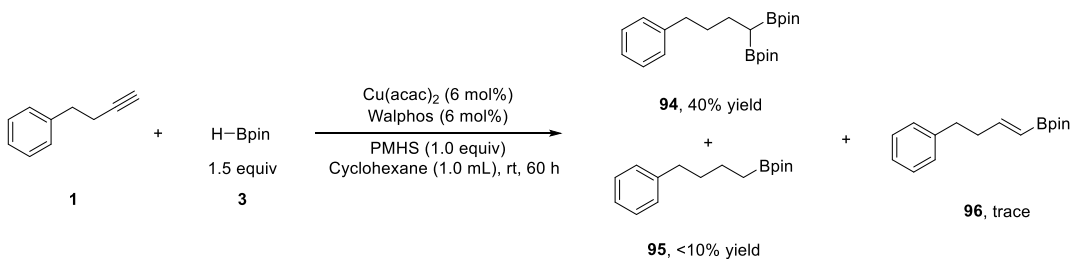

**Supplementary Figure 7. Control experiments.** **1** was exposed to HBpin in the absence of HBdan, under the standard reaction conditions.

A tube was charged with Cu(acac)<sub>2</sub> (6 mol%) and Walphos (4 mol%) under N<sub>2</sub> atmosphere, then cyclohexane (1.0 mL), HBpin (0.3 mmol), PMHS (1.0 equiv) and **1a** (0.2 mmol) were added subsequently at room temperature, then the resulting mixture was stirred at ambient temperature for 60 h. The yields of products were determined with gas chromatography (GC) analysis with Dodecane as internal standard. The yields of products were determined with gas chromatography (GC) analysis with dodecane as internal standard.

3)

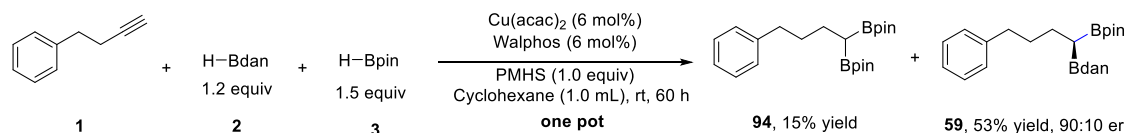

**Supplementary Figure 8. Control experiments.** One-pot reaction to the target product **59**.

A tube was charged with  $\text{Cu}(\text{acac})_2$  (6 mol%) and Walphos (6 mol%) under  $\text{N}_2$  atmosphere, then cyclohexane (1.0 mL), HBdan (0.24 mmol), HBpin (0.3 mmol), PMHS (1.0 equiv) and **1** (0.2 mmol) were added subsequently at room temperature in one pot, then the resulting mixture was stirred at ambient temperature for 60 h. The residue was purified by column chromatography to afford the corresponding product.

4)

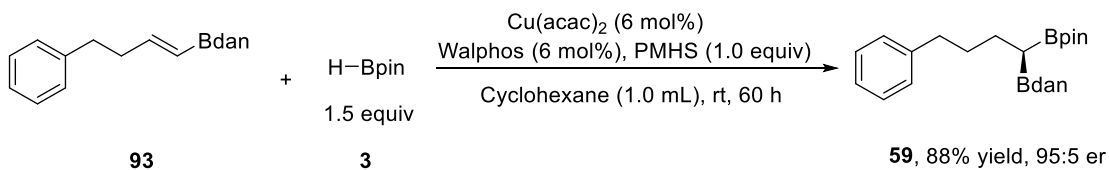

**Supplementary Figure 9. Control experiments.** alkenyl-Bdan **93** and HBpin was exposed under the standard asymmetric reaction conditions.

A tube was charged with  $\text{Cu}(\text{acac})_2$  (6 mol%) and Walphos (4 mol%) under  $\text{N}_2$  atmosphere, then cyclohexane (1.0 mL), HBpin (0.3 mmol), PMHS (1.0 equiv) and **94** (0.2 mmol) were added subsequently at room temperature in one pot, then the resulting mixture was stirred at ambient temperature for 60 h. The residue was purified by column chromatography to afford the corresponding product **59**.

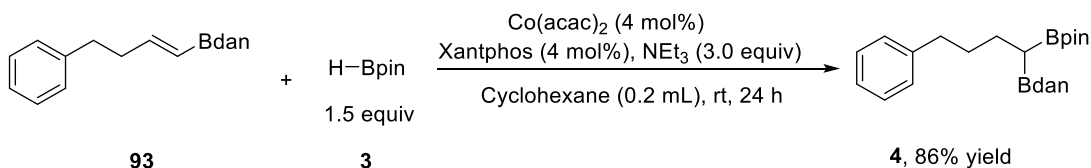

**Supplementary Figure 10. Control experiments.** alkenyl-Bdan **93** and HBpin was exposed under the standard racemic reaction conditions.

A tube was charged with  $\text{Cu}(\text{acac})_2$  (6 mol%) and Walphos (4 mol%) under  $\text{N}_2$  atmosphere, then cyclohexane (1.0 mL), HBpin (0.3 mmol), PMHS (1.0 equiv) and **94** (0.2 mmol) were added subsequently at room temperature in one pot, then the resulting mixture was stirred at ambient temperature for 24 h. The residue was purified by column chromatography to afford the corresponding product **4**.

5)

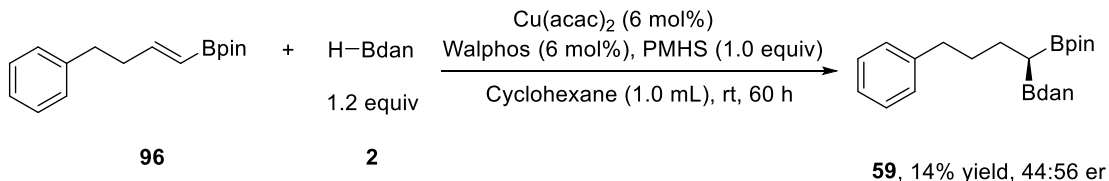

**Supplementary Figure 11. Control experiments.** alkenyl-Bpin **96** and HBdan was exposed under the standard asymmetric reaction conditions.

A tube was charged with  $\text{Cu}(\text{acac})_2$  (6 mol%) and Walphos (6 mol%) under  $\text{N}_2$  atmosphere, then cyclohexane (1.0 mL), HBdan (0.24 mmol), PMHS (1.0 equiv) and **97** (0.2 mmol) were added subsequently at room temperature in one pot, then the resulting mixture was stirred at ambient temperature for 60 h. The residue was purified by column chromatography to afford the corresponding product.

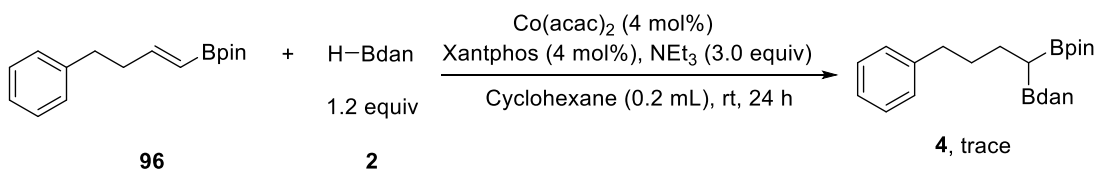

**Supplementary Figure 12. Control experiments.** alkenyl-Bpin **96** and HBdan was exposed under the standard racemic reaction conditions.

A tube was charged with  $\text{Co}(\text{acac})_2$  (6 mol%) and Xantphos (6 mol%) under  $\text{N}_2$  atmosphere, then cyclohexane (1.0 mL), HBdan (0.24 mmol),  $\text{NEt}_3$  (3.0 equiv) and **97** (0.2 mmol) were added subsequently at room temperature in one pot, then the resulting mixture was stirred at ambient temperature for 24 h. The crude mixture was detected by GC-MS.

6)

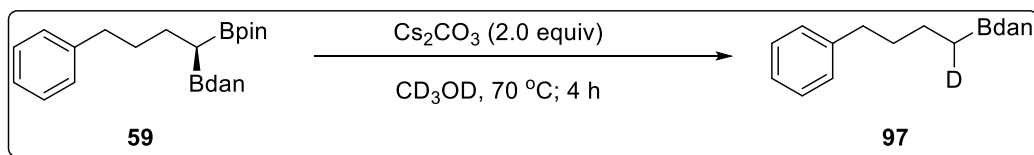

**Supplementary Figure 13. Control experiments.** deuterium experiment.

To a 25 mL Schlenk tube, was added gem-diborylalkanes **59** (0.2 mmol, 1.0 equiv) followed by 0.4 mmol of  $\text{Cs}_2\text{CO}_3$  (2 equiv) under air. Then  $\text{CD}_3\text{OD}$  (0.5 mL) was added at rt and the reaction mixture was stirred at  $70^\circ\text{C}$  for 4 h. When over, the reaction mixture was extracted with EA/ $\text{H}_2\text{O}$ . Subsequently, the organic layers

were dried with  $\text{Na}_2\text{SO}_4$ , and concentrated to dryness. The combined filtrates were concentrated and crude product was purified by flash column chromatography using PE/EtOAc = 100/1 as the eluent to give the corresponding product **97** as a colorless oil<sup>1</sup>.

### 3.2. $^{31}\text{P}$ NMR Studies

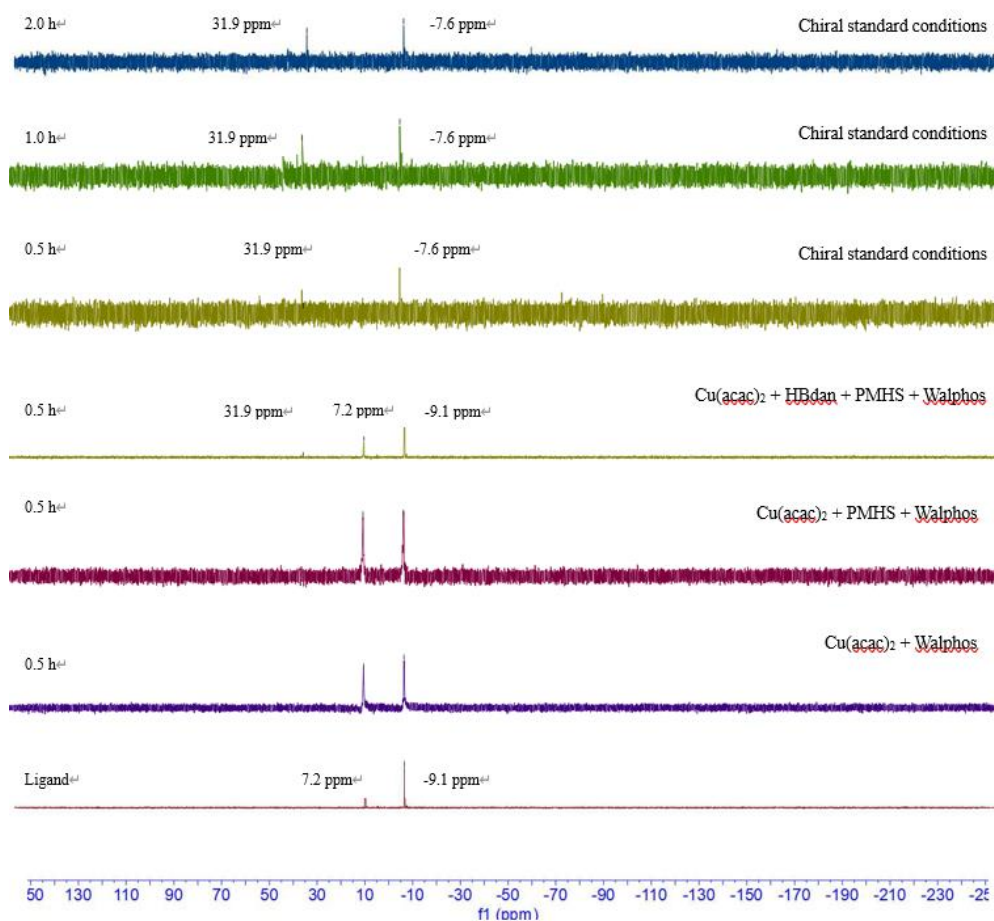

**Supplementary Figure 14.  $^{31}\text{P}$  NMR Studies.**  $^{31}\text{P}$  NMR spectra along with different reaction times.

We monitored the changes in yields over time, and we found that the yield of **4** gradually increased as the time went on during the reaction; on the other hand, the yields of alkenyl-Bdan **94** increased at the first 2 h and decreased gradually after that. These results validated the intermediacy of alkenyl-Bdan species and the first hydroboration should precede with HBdan and the second hydroboration should be with HBpin in this catalytic process. This is further supported by  $^{31}\text{P}$  NMR analysis of the hydroboration cycle: When we use chiral standard conditions, free Walphos still existed after 5 mins, as time went by, the typical peaks of the

free Walphos disappeared while new peaks at  $\delta = -7.46$  ppm and  $\delta = -31.9$  ppm showed up, which suggested that the ligand started to function with copper salt to form a new complex in the solution. In order to understand the type of complex, we further carried out several control experiments by stepwise addition of copper salt as well as PMHS and HBdan into the solution of Walphos, we found that that the ligand started to function with copper salt to form a new complex in the solution.

### 3.3 Crystal Data of 4, 59 and 89<sup>b</sup>

Crystallographic data for compound **4** (CCDC-2039502) has been deposited with the Cambridge Crystallographic Data Centre, Copies of the data can be obtained, free of charge, on application to CCDC (Email: deposit@ccdc.cam.ac.uk).

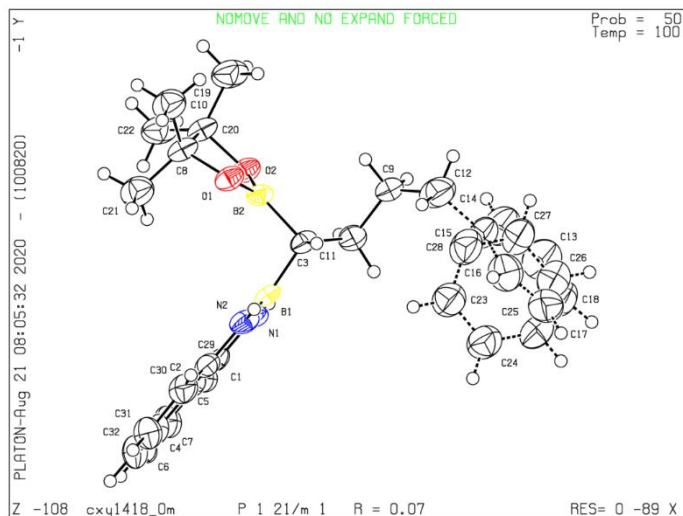

**Supplementary Figure 15. Crystal structure of compound 4**

|                        |                                            |                         |                |
|------------------------|--------------------------------------------|-------------------------|----------------|
| Bond precision:        | = 0.0000 Å                                 | Wavelength=             | 1.54178        |
| Cell:                  | a=10.0572 (15)                             | b=10.3891 (16)          | c=12.520 (2)   |
|                        | alpha=90                                   | beta=105.820 (17)       | gamma=90       |
| Temperature:           | 100 K                                      |                         |                |
| Volume                 | Calculated                                 | Reported                |                |
|                        | 1258.6 (4)                                 | 1258.6 (4)              |                |
| Space group            | P 21/m                                     | P 1 21/m 1              |                |
| Hall group             | -P 2yb                                     | -P 2yb                  |                |
| Moiety formula         | C26 H32 B2 N2 O2                           | C24.39 H30.66 B2 N2 O2, |                |
|                        |                                            | 0.27 (C6 H5)            |                |
| Sum formula            | C26 H32 B2 N2 O2                           | C26 H32 B2 N2 O2        |                |
| Mr                     | 426.16                                     | 426.15                  |                |
| Dx, g cm <sup>-3</sup> | 1.125                                      | 1.124                   |                |
| Z                      | 2                                          | 2                       |                |
| Mu (mm <sup>-1</sup> ) | 0.540                                      | 0.540                   |                |
| F000                   | 456.0                                      | 456.0                   |                |
| F000'                  | 457.22                                     |                         |                |
| h, k, lmax             | 11, 12, 14                                 | 11, 12, 14              |                |
| Nref                   | 2344                                       | 2338                    |                |
| Tmin, Tmax             | 0.801, 0.841                               | 0.703, 0.753            |                |
| Tmin'                  | 0.801                                      |                         |                |
| Correction method=     | # Reported T Limits: Tmin=0.703 Tmax=0.753 |                         |                |
| AbsCorr =              | MULTI-SCAN                                 |                         |                |
| Data completeness=     | 0.997                                      | Theta (max)=            | 66.412         |
| R (reflections)=       | 0.0695 ( 2059)                             | wR2 (reflections)=      | 0.1801 ( 2338) |
| S =                    | 1.055                                      | Npar=                   | 298            |

Crystallographic data for compound **59** (CCDC-2107254) has been deposited with the Cambridge Crystallographic Data Centre, Copies of the data can be obtained, free of charge, on application to CCDC (Email: deposit@ccdc.cam.ac.uk).

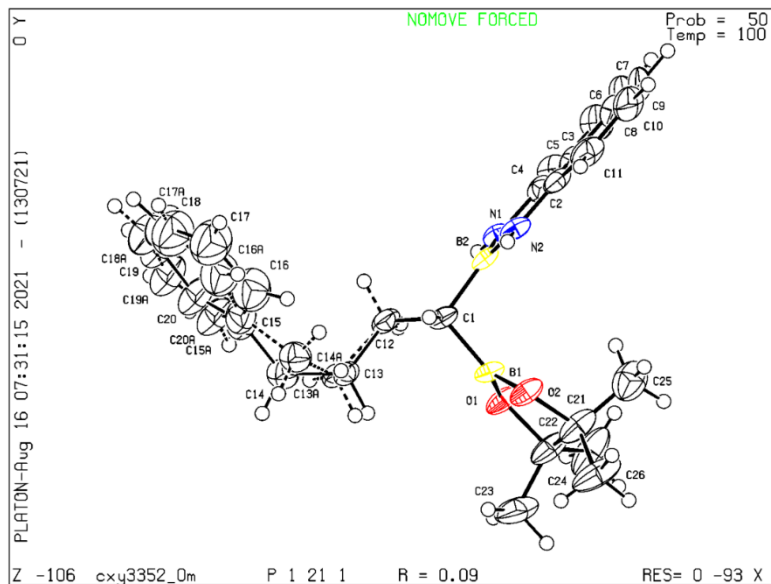

**Supplementary Figure 16. Crystal structure of compound 59**

|                                |                                          |                                     |                           |
|--------------------------------|------------------------------------------|-------------------------------------|---------------------------|
| Bond precision:                | C-C = 0.0086 Å                           | Wavelength=1.54178                  |                           |
| Cell:                          | a=9.9834 (5)<br>alpha=90                 | b=10.1836 (5)<br>beta=105.559 (2)   | c=12.3364 (6)<br>gamma=90 |
| Temperature:                   | 100 K                                    |                                     |                           |
| Volume                         | Calculated<br>1208.24 (10)               | Reported<br>1208.24 (10)            |                           |
| Space group                    | P 21                                     | P 1 21 1                            |                           |
| Hall group                     | P 2yb                                    | P 2yb                               |                           |
| Moiety formula                 | C26 H32 B2 N2 O2                         | C26 H32 B2 N2 O2                    |                           |
| Sum formula                    | C26 H32 B2 N2 O2                         | C26 H32 B2 N2 O2                    |                           |
| Mr                             | 426.16                                   | 426.15                              |                           |
| Dx, g cm <sup>-3</sup>         | 1.171                                    | 1.171                               |                           |
| Z                              | 2                                        | 2                                   |                           |
| Mu (mm <sup>-1</sup> )         | 0.562                                    | 0.562                               |                           |
| F000                           | 456.0                                    | 456.0                               |                           |
| F000'                          | 457.22                                   |                                     |                           |
| h, k, lmax                     | 12, 12, 14                               | 12, 12, 14                          |                           |
| Nref                           | 4454 [ 2362]                             | 4404                                |                           |
| Tmin, Tmax                     | 0.856, 0.889                             | 0.673, 0.753                        |                           |
| Tmin'                          | 0.840                                    |                                     |                           |
| Correction method= #           | Reported T Limits: Tmin=0.673 Tmax=0.753 |                                     |                           |
| AbsCorr = MULTI-SCAN           |                                          |                                     |                           |
| Data completeness= 1.86/0.99   | Theta(max)= 68.526                       |                                     |                           |
| R(reflections)= 0.0902 ( 4314) |                                          | wR2(reflections)=<br>0.2909 ( 4404) |                           |
| S = 1.488                      | Npar= 306                                |                                     |                           |

Crystallographic data for compound **89<sup>b</sup>** (CCDC- 2118336) has been deposited with the Cambridge Crystallographic Data Centre, Copies of the data can be obtained, free of charge, on application to CCDC (Email: [deposit@ccdc.cam.ac.uk](mailto:deposit@ccdc.cam.ac.uk)).

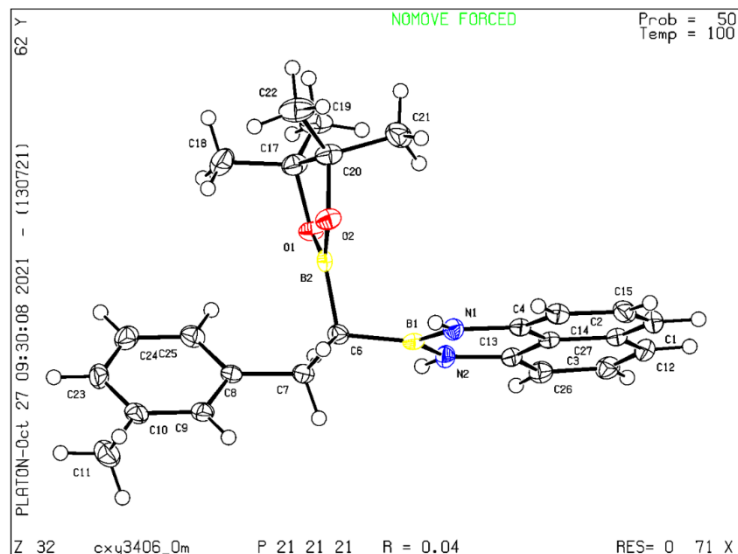

**Supplementary Figure 17. Crystal structure of compound 89**

|                                                               |                    |                    |                |
|---------------------------------------------------------------|--------------------|--------------------|----------------|
| Bond precision:                                               | C-C = 0.0031 Å     | Wavelength=1.54178 |                |
| Cell:                                                         | a=6.4367 (3)       | b=11.4196 (5)      | c=30.5689 (15) |
|                                                               | alpha=90           | beta=90            | gamma=90       |
| Temperature:                                                  | 100 K              |                    |                |
|                                                               | Calculated         | Reported           |                |
| Volume                                                        | 2246.95 (18)       | 2246.95 (18)       |                |
| Space group                                                   | P 21 21 21         | P 21 21 21         |                |
| Hall group                                                    | P 2ac 2ab          | P 2ac 2ab          |                |
| Moiety formula                                                | C25 H30 B2 N2 O2   | C25 H30 B2 N2 O2   |                |
| Sum formula                                                   | C25 H30 B2 N2 O2   | C25 H30 B2 N2 O2   |                |
| Mr                                                            | 412.13             | 412.13             |                |
| Dx, g cm <sup>-3</sup>                                        | 1.218              | 1.218              |                |
| Z                                                             | 4                  | 4                  |                |
| Mu (mm <sup>-1</sup> )                                        | 0.588              | 0.588              |                |
| F000                                                          | 880.0              | 880.0              |                |
| F000'                                                         | 882.38             |                    |                |
| h, k, lmax                                                    | 7, 13, 36          | 7, 13, 36          |                |
| Nref                                                          | 4125 [ 2400]       | 4120               |                |
| Tmin, Tmax                                                    | 0.881, 0.910       | 0.872, 1.000       |                |
| Tmin'                                                         | 0.863              |                    |                |
| Correction method= # Reported T Limits: Tmin=0.872 Tmax=1.000 |                    |                    |                |
| AbsCorr = MULTI-SCAN                                          |                    |                    |                |
| Data completeness= 1.72/1.00                                  | Theta(max)= 68.383 |                    |                |
| R(reflections)= 0.0360 ( 3970)                                | wR2(reflections)=  |                    |                |
| S = 1.083                                                     | 0.0890 ( 4120)     |                    |                |
| Npar= 285                                                     |                    |                    |                |



### 3.4 Characterization Data

2-(4-phenyl-1-(4,4,5,5-tetramethyl-1,3,2-dioxaborolan-2-yl)butyl)-2,3-dihydro-1H-naphtho[1,8-de][1,3,2]diazaborinine (4)

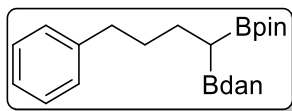

4

The reaction was performed following the general procedure A. The residue was purified by flash column chromatograph to give the product as a crystalline solid (64.7 mg, 76%). <sup>1</sup>H NMR (500 MHz, CDCl<sub>3</sub>) δ 7.31 – 7.27 (m, 2H), 7.21 – 7.18 (m, 3H), 7.11 – 7.07 (m, 2H), 6.99 (d, *J* = 8.3 Hz, 2H), 6.27 (d, *J* = 7.3 Hz, 2H), 5.76 (s, 2H), 2.65 (t, *J* = 6.9 Hz, 2H), 1.71 – 1.66 (m, 2H), 1.62 – 1.56 (m, 2H), 1.25 (d, *J* = 6.0 Hz, 12H), 0.78 (dd, *J* = 8.2, 6.0 Hz, 1H). <sup>13</sup>C NMR (126 MHz, CDCl<sub>3</sub>) δ 142.6, 141.3, 136.3, 128.4, 128.3, 127.56, 125.7, 119.5, 117.3, 105.5, 83.2, 36.0, 34.0, 26.0, 25.1, 24.5. <sup>11</sup>B NMR (160 MHz, CDCl<sub>3</sub>) δ 34.18, 33.79. HRMS (ESI, *m/z*) calcd for C<sub>26</sub>H<sub>33</sub>B<sub>2</sub>N<sub>2</sub>O<sub>3</sub> [M+H]<sup>+</sup>: 427.2723; found: 427.2726.

2-(3-phenyl-1-(4,4,5,5-tetramethyl-1,3,2-dioxaborolan-2-yl)propyl)-2,3-dihydro-1H-naphtho[1,8-de][1,3,2]diazaborinine (5)

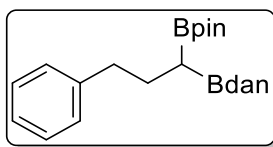

5

The reaction was performed following the general procedure A. The residue was purified by flash column chromatograph to give the product as a crystalline solid (51.9 mg, 63%). <sup>1</sup>H NMR (500 MHz, CDCl<sub>3</sub>) δ 7.32 – 7.27 (m, 2H), 7.21 (dd, *J* = 13.2, 7.0 Hz, 3H), 7.10 (t, *J* = 7.8 Hz, 2H), 7.00 (d, *J* = 8.2 Hz, 2H), 6.29 (d, *J* = 7.3 Hz, 2H), 5.80 (s, 2H), 2.78 – 2.70 (m, 1H), 2.64 – 2.60 (m, 1H), 2.03 – 1.94 (m, 1H), 1.88 – 1.83 (m, 1H), 1.28 (s, 6H), 1.27 (s, 6H), 0.84 (dd, *J* = 9.8, 5.6 Hz, 1H). <sup>13</sup>C NMR (126 MHz, CDCl<sub>3</sub>) δ 142.6, 141.3, 136.3, 128.5, 128.33 (s), 127.6, 125.8, 119.5, 117.3, 105.5, 83.3, 38.5, 28.6, 25.1, 24.5. <sup>11</sup>B NMR (160 MHz, CDCl<sub>3</sub>) δ 34.23, 34.02. HRMS (ESI, *m/z*) calcd for C<sub>25</sub>H<sub>31</sub>B<sub>2</sub>N<sub>2</sub>O<sub>2</sub> [M+H]<sup>+</sup>: 413.2566; found: 413.2561.

2-(2-cyclopropyl-1-(4,4,5,5-tetramethyl-1,3,2-dioxaborolan-2-yl)ethyl)-2,3-dihydro-1H-naphtho[1,8-de][1,3,2]diazaborinine (6)

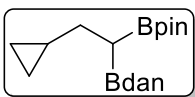

6

The reaction was performed following the general procedure A. The residue was purified by flash column chromatograph to give the product as a crystalline solid (33.3 mg, 46%). <sup>1</sup>H NMR (500 MHz, CDCl<sub>3</sub>) δ 7.08 (t, *J* = 7.8 Hz, 2H), 6.99 (d, *J* = 8.2 Hz, 2H), 6.28 (d, *J* = 7.3 Hz, 2H), 5.80 (s, 2H), 1.57 – 1.52 (m, 1H), 1.47 – 1.43 (m, 1H), 1.25 (d, *J* = 4.6 Hz, 12H), 0.90 (dd, *J* = 9.5, 6.1 Hz, 1H), 0.76 (dt, *J* = 12.3, 5.1 Hz, 1H), 0.41 (d, *J* = 7.9 Hz, 2H), 0.13 (dd, *J* = 8.8, 3.9 Hz, 1H), 0.07 – 0.04 (m, 1H). <sup>13</sup>C NMR (126 MHz, CDCl<sub>3</sub>) δ 141.3,

136.3, 127.5, 119.5, 117.2, 105.4, 83.2, 31.6, 25.0, 24.8, 24.6, 13.4, 5.1, 4.8.  $^{11}\text{B}$  NMR (160 MHz,  $\text{CDCl}_3$ )  $\delta$  34.58, 34.03. HRMS (ESI,  $m/z$ ) calcd for  $\text{C}_{21}\text{H}_{29}\text{B}_2\text{N}_2\text{O}_2$   $[\text{M}+\text{H}]^+$ : 363.2410; found: 363.2401.

**2-(3-cyclohexyl-1-(4,4,5,5-tetramethyl-1,3,2-dioxaborolan-2-yl)propyl)-2,3-dihydro-1H-naphtho[1,8-de][1,3,2]diazaborinine (7)**

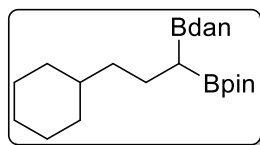

7

The reaction was performed following the general procedure A. The residue was purified by flash column chromatograph to give the product as a crystalline solid (51.0 mg, 51%).  $^1\text{H}$  NMR (500 MHz,  $\text{CDCl}_3$ )  $\delta$  7.12 – 7.07 (m, 2H), 7.00 (d,  $J = 8.2$  Hz, 2H), 6.29 (d,  $J = 7.2$  Hz, 2H), 5.80 (s, 2H), 1.75 – 1.63 (m, 8H), 1.56 (d,  $J = 4.3$  Hz, 2H), 1.24 (s, 12H), 1.18 (dd,  $J = 18.8, 6.8$  Hz, 3H), 0.89 (d,  $J = 11.3$  Hz, 2H), 0.73 – 0.69 (m, 1H).  $^{13}\text{C}$  NMR (126 MHz,  $\text{CDCl}_3$ )  $\delta$  141.4, 136.3, 127.5, 119.5, 117.2, 105.4, 83.1, 40.3, 37.8, 33.5, 33.4, 33.3, 26.8, 26.4, 25.1, 24.9, 24.5, 24.5, 23.7.  $^{11}\text{B}$  NMR (160 MHz,  $\text{CDCl}_3$ )  $\delta$  35.43, 34.63. HRMS (ESI,  $m/z$ ) calcd for  $\text{C}_{25}\text{H}_{37}\text{B}_2\text{N}_2\text{O}_2$   $[\text{M}+\text{H}]^+$ : 419.3036; found: 419.3032.

**2-(2-cyclopentyl-1-(4,4,5,5-tetramethyl-1,3,2-dioxaborolan-2-yl)ethyl)-2,3-dihydro-1H-naphtho[1,8-de][1,3,2]diazaborinine (8)**

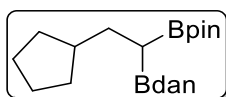

8

The reaction was performed following the general procedure A. The residue was purified by flash column chromatograph to give the product as a crystalline solid (45.3 mg, 58%).  $^1\text{H}$  NMR (500 MHz,  $\text{CDCl}_3$ )  $\delta$  7.09 (t,  $J = 7.8$  Hz, 2H), 6.99 (d,  $J = 8.2$  Hz, 2H), 6.29 (d,  $J = 7.3$  Hz, 2H), 5.78 (s, 2H), 1.79 – 1.69 (m, 4H), 1.61 – 1.56 (m, 3H), 1.52 – 1.48 (m, 2H), 1.24 (d,  $J = 5.7$  Hz, 12H), 1.09 (dt,  $J = 10.7, 3.3$  Hz, 2H), 0.83 (dd,  $J = 9.1, 6.2$  Hz, 1H).  $^{13}\text{C}$  NMR (126 MHz,  $\text{CDCl}_3$ )  $\delta$  141.4, 136.3, 127.5, 119.5, 117.2, 105.4, 83.2, 82.9, 42.4, 32.8, 32.6, 32.52, 32.50, 25.21, 25.18, 25.0, 24.8, 24.60, 24.57.  $^{11}\text{B}$  NMR (160 MHz,  $\text{CDCl}_3$ )  $\delta$  34.38, 33.90. HRMS (ESI,  $m/z$ ) calcd for  $\text{C}_{23}\text{H}_{32}\text{B}_2\text{N}_2\text{NaO}_2$   $[\text{M}+\text{Na}]^+$ : 413.2542; found: 413.2534.

**2-(1-(4,4,5,5-tetramethyl-1,3,2-dioxaborolan-2-yl)pentyl)-2,3-dihydro-1H-naphtho[1,8-de][1,3,2]diazaborinine (9)**

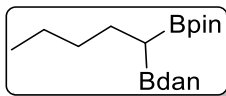

9

The reaction was performed following the general procedure A. The residue was purified by flash column chromatograph to give the product as a crystalline solid (52.5 mg, 72%).  $^1\text{H}$  NMR (500 MHz,  $\text{CDCl}_3$ )  $\delta$  7.09 (t,  $J = 7.8$  Hz, 2H), 6.99 (d,  $J = 8.2$  Hz, 2H), 6.29 (d,  $J = 7.3$  Hz, 2H), 5.80 (s, 2H), 1.67 – 1.59 (m, 1H), 1.54

(dd,  $J = 13.9, 7.4$  Hz, 1H), 1.37 – 1.31 (m, 4H), 1.25 (d,  $J = 6.1$  Hz, 12H), 0.91 (t,  $J = 6.9$  Hz, 3H), 0.75 (dd,  $J = 9.3, 6.3$  Hz, 1H).  $^{13}\text{C}$  NMR (126 MHz,  $\text{CDCl}_3$ )  $\delta$  141.4, 136.3, 127.5, 119.5, 117.2, 105.4, 83.1, 34.9, 34.6, 26.1, 25.0, 24.9, 24.5, 24.5, 22.8, 14.1.  $^{11}\text{B}$  NMR (160 MHz,  $\text{CDCl}_3$ )  $\delta$  34.66, 34.34. HRMS (ESI,  $m/z$ ) calcd for  $\text{C}_{21}\text{H}_{31}\text{B}_2\text{N}_2\text{O}_2$   $[\text{M}+\text{H}]^+$ : 365.2566; found: 365.2571.

**2-(1-(4,4,5,5-tetramethyl-1,3,2-dioxaborolan-2-yl)heptyl)-2,3-dihydro-1H-naphtho[1,8-de][1,3,2]diazaborinine (10)**

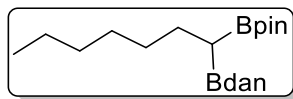

**10**

The reaction was performed following the general procedure A. The residue was purified by flash column chromatograph to give the product as a crystalline solid (61.2 mg, 78%).  $^1\text{H}$  NMR (500 MHz,  $\text{CDCl}_3$ )  $\delta$  7.10 – 7.07 (m, 2H), 6.98 (d,  $J = 7.3$  Hz, 2H), 6.28 (d,  $J = 7.3$  Hz, 2H), 5.78 (s, 2H), 1.54 (d,  $J = 7.3$  Hz, 2H), 1.24 (s, 8H), 1.23 (s, 6H), 1.22 (s, 6H), 0.87 (d,  $J = 3.2$  Hz, 3H), 0.74 – 0.72 (m, 1H).  $^{13}\text{C}$  NMR (126 MHz,  $\text{CDCl}_3$ )  $\delta$  141.4, 136.3, 127.5, 119.5, 117.2, 105.4, 83.1, 82.9, 32.6, 32.4, 31.8, 29.4, 29.3, 26.4, 25.7, 25.0, 24.9, 24.53, 24.50, 22.7, 22.6, 14.1.  $^{11}\text{B}$  NMR (160 MHz,  $\text{CDCl}_3$ )  $\delta$  34.88, 34.11. HRMS (ESI,  $m/z$ ) calcd for  $\text{C}_{23}\text{H}_{35}\text{B}_2\text{N}_2\text{O}_2$   $[\text{M}+\text{H}]^+$ : 393.2879; found: 393.2874.

**2-(1-(4,4,5,5-tetramethyl-1,3,2-dioxaborolan-2-yl)octyl)-2,3-dihydro-1H-naphtho[1,8-de][1,3,2]diazaborinine (11)**

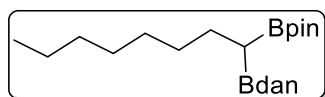

**11**

The reaction was performed following the general procedure A. The residue was purified by flash column chromatograph to give the product as a crystalline solid (61.8 mg, 76%).  $^1\text{H}$  NMR (500 MHz,  $\text{CDCl}_3$ )  $\delta$  7.10 – 7.06 (m, 2H), 6.98 (d,  $J = 8.2$  Hz, 2H), 6.28 (d,  $J = 7.3$  Hz, 2H), 5.79 (s, 2H), 1.57 – 1.41 (m, 2H), 1.27 (dd,  $J = 7.6, 2.5$  Hz, 10H), 1.25 (s, 6H), 1.24 (s, 6H), 0.88 (t,  $J = 6.8$  Hz, 3H), 0.75 – 0.72 (m, 1H).  $^{13}\text{C}$  NMR (126 MHz,  $\text{CDCl}_3$ )  $\delta$  141.4, 136.3, 127.5, 119.5, 117.2, 105.4, 83.1, 32.4, 31.9, 29.7, 29.2, 26.4, 25.0, 24.9, 24.5, 22.7, 14.1.  $^{11}\text{B}$  NMR (160 MHz,  $\text{CDCl}_3$ )  $\delta$  34.23, 33.23. HRMS (ESI,  $m/z$ ) calcd for  $\text{C}_{24}\text{H}_{36}\text{B}_2\text{N}_2\text{NaO}_2$   $[\text{M}+\text{Na}]^+$ : 429.2855; found: 429.2859.

**2-(1-(4,4,5,5-tetramethyl-1,3,2-dioxaborolan-2-yl)octyl)-2,3-dihydro-1H-naphtho[1,8-de][1,3,2]diazaborinine (12)**

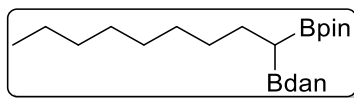

**12**

The reaction was performed following the general procedure A. The residue was purified by flash column chromatograph to give the product as a crystalline solid (57.2 mg, 68%).  $^1\text{H}$  NMR (500 MHz,  $\text{CDCl}_3$ )  $\delta$  7.10 (t,  $J = 7.8$  Hz, 2H), 7.00 (d,  $J = 8.2$  Hz, 2H), 6.30 (d,  $J = 7.3$  Hz, 2H), 5.81 (s, 2H), 1.67 – 1.61 (m, 1H), 1.55

– 1.50 (m, 1H), 1.34 – 1.27 (m, 12H), 1.26 (d,  $J = 6.2$  Hz, 12H), 0.90 (t,  $J = 6.8$  Hz, 3H), 0.76 (dd,  $J = 9.4, 6.0$  Hz, 1H).  $^{13}\text{C}$  NMR (126 MHz,  $\text{CDCl}_3$ )  $\delta$  141.4, 136.3, 127.6, 119.5, 117.2, 105.4, 83.2, 32.4, 31.9, 29.7, 29.5, 29.3, 26.4, 25.0, 24.5, 22.7, 14.1.  $^{11}\text{B}$  NMR (160 MHz,  $\text{CDCl}_3$ )  $\delta$  34.45, 34.19. HRMS (ESI,  $m/z$ ) calcd for  $\text{C}_{25}\text{H}_{39}\text{B}_2\text{N}_2\text{O}_2$   $[\text{M}+\text{H}]^+$ : 421.3192; found: 421.3195.

**2-(5-methyl-1-(4,4,5,5-tetramethyl-1,3,2-dioxaborolan-2-yl)hexyl)-2,3-dihydro-1H-naphtho[1,8-de][1,3,2]diazaborinine (13)**

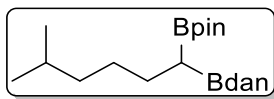

**13**

The reaction was performed following the general procedure A. The residue was purified by flash column chromatograph to give the product as a crystalline solid (48.6 mg, 62%).  $^1\text{H}$  NMR (500 MHz,  $\text{CDCl}_3$ )  $\delta$  7.09 (t,  $J = 7.8$  Hz, 2H), 6.99 (d,  $J = 8.2$  Hz, 2H), 6.29 (d,  $J = 7.2$  Hz, 2H), 5.80 (s, 2H), 1.64 – 1.60 (m, 1H), 1.53 (td,  $J = 8.1, 7.4, 4.5$  Hz, 2H), 1.37 (qd,  $J = 8.3, 5.5$  Hz, 4H), 1.26 (s, 3H), 1.25 (s, 5H), 1.24 (s, 4H), 1.23 (s, 3H), 0.88 (d,  $J = 6.6$  Hz, 3H), 0.85 (d,  $J = 6.5$  Hz, 3H), 0.76 (dt,  $J = 10.1, 5.2$  Hz, 1H).  $^{13}\text{C}$  NMR (126 MHz,  $\text{CDCl}_3$ )  $\delta$  141.4, 136.3, 127.5, 119.5, 117.2, 105.4, 83.1, 39.1, 30.1, 27.8, 26.6, 25.0, 24.9, 24.5, 24.5, 22.7, 22.6.  $^{11}\text{B}$  NMR (160 MHz,  $\text{CDCl}_3$ )  $\delta$  34.33, 33.33. HRMS (ESI,  $m/z$ ) calcd for  $\text{C}_{23}\text{H}_{34}\text{B}_2\text{N}_2\text{NaO}_2$   $[\text{M}+\text{H}]^+$ : 415.2699; found: 415.2699.

**2-(3,3-dimethyl-1-(4,4,5,5-tetramethyl-1,3,2-dioxaborolan-2-yl)butyl)-2,3-dihydro-1H-naphtho[1,8-de][1,3,2]diazaborinine (14)**

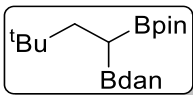

**14**

The reaction was performed following the general procedure A. The residue was purified by flash column chromatograph to give the product as a crystalline solid (42.4 mg, 56%).  $^1\text{H}$  NMR (500 MHz,  $\text{CDCl}_3$ )  $\delta$  7.11 – 7.06 (m, 2H), 7.00 (dd,  $J = 8.3, 1.8$  Hz, 2H), 6.26 (d,  $J = 7.2$  Hz, 2H), 5.60 (d,  $J = 18.6$  Hz, 2H), 1.35 – 1.27 (m, 12H), 1.26 (s, 2H), 1.24 – 1.17 (m, 9H), 0.91 – 0.86 (m, 1H).  $^{13}\text{C}$  NMR (126 MHz,  $\text{CDCl}_3$ )  $\delta$  141.3, 127.5, 117.2, 105.4, 83.2, 82.9, 40.3, 39.23, 31.8, 31.6, 29.3, 29.2, 24.9, 24.8, 24.7, 24.6.  $^{11}\text{B}$  NMR (160 MHz,  $\text{CDCl}_3$ )  $\delta$  34.35, 34.06. HRMS (ESI,  $m/z$ ) calcd for  $\text{C}_{22}\text{H}_{33}\text{B}_2\text{N}_2\text{O}_2$   $[\text{M}+\text{H}]^+$ : 379.2723; found: 379.2723.

**2-(6-((tert-butyl)dimethylsilyloxy)-1-(4,4,5,5-tetramethyl-1,3,2-dioxaborolan-2-yl)hexyl)-2,3-dihydro-1H-naphtho[1,8-de][1,3,2]diazaborinine (15)**

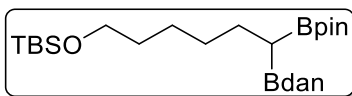

**15**

The reaction was performed following the general procedure A. The residue was purified by flash column chromatograph to give the product as a crystalline solid (64.1 mg, 63%).  $^1\text{H}$  NMR (500 MHz,  $\text{CDCl}_3$ )  $\delta$  7.08 (t,  $J = 7.8$  Hz, 2H), 6.98 (d,  $J = 8.2$  Hz, 2H), 6.28 (d,  $J = 7.3$  Hz, 2H), 5.79 (s, 2H), 3.59 (d,  $J = 6.6$  Hz, 2H),

1.55 – 1.48 (m, 4H), 1.35 (dd,  $J = 12.2, 6.6$  Hz, 4H), 1.25 (s, 6H), 1.23 (s, 6H), 0.89 (s, 9H), 0.75 – 0.71 (m, 1H), 0.04 (s, 6H).  $^{13}\text{C NMR}$  (126 MHz,  $\text{CDCl}_3$ )  $\delta$  141.3, 136.3, 127.5, 119.5, 117.2, 105.4, 83.2, 63.3, 32.8, 32.2, 26.4, 26.0, 25.9, 25.0, 24.9, 24.5, 24.52, 24.50, 18.4, -5.2.  $^{11}\text{B NMR}$  (160 MHz,  $\text{CDCl}_3$ )  $\delta$  33.92, 33.51. **HRMS** (ESI,  $m/z$ ) calcd for  $\text{C}_{28}\text{H}_{47}\text{B}_2\text{N}_2\text{O}_3\text{Si}$   $[\text{M}+\text{H}]^+$ : 509.3537; found: 509.3530.

**2-(4-((tert-butyldimethylsilyl)oxy)-1-(4,4,5,5-tetramethyl-1,3,2-dioxaborolan-2-yl)butyl)-2,3-dihydro-1H-naphtho[1,8-de][1,3,2]diazaborinine (16)**

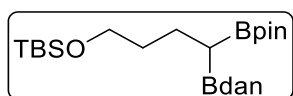

**16**

**The reaction was performed following the general procedure A.** The residue was purified by flash column chromatograph to give the product as a crystalline solid (50.0 mg, 52%)  $^1\text{H NMR}$  (500 MHz,  $\text{CDCl}_3$ )  $\delta$  7.11 (dd,  $J = 8.2, 7.3$  Hz, 2H), 7.01 (dd,  $J = 8.3, 1.0$  Hz, 2H), 6.30 (dd,  $J = 7.4, 1.0$  Hz, 2H), 5.86 (s, 2H), 3.68 – 3.64 (m, 2H), 1.66 (dd,  $J = 13.6, 5.3$  Hz, 2H), 1.63 – 1.56 (m, 2H), 1.26 (d,  $J = 5.3$  Hz, 12H), 0.94 (s, 9H), 0.78 (dd,  $J = 8.7, 5.6$  Hz, 1H), 0.09 (d,  $J = 1.0$  Hz, 6H).  $^{13}\text{C NMR}$  (126 MHz,  $\text{CDCl}_3$ )  $\delta$  141.3, 136.3, 127.5, 119.5, 117.2, 105.4, 83.2, 82.9, 63.2, 35.4, 25.1, 24.9, 24.54, 24.52, 22.4, 18.4, -5.2.  $^{11}\text{B NMR}$  (160 MHz,  $\text{CDCl}_3$ )  $\delta$  34.08, 33.91. **HRMS** (ESI,  $m/z$ ) calcd for  $\text{C}_{26}\text{H}_{43}\text{B}_2\text{N}_2\text{O}_3\text{Si}$   $[\text{M}+\text{H}]^+$ : 481.3224; found: 481.3221.

**tert-butyl 4-(2-(1H-naphtho[1,8-de][1,3,2]diazaborinin-2(3H)-yl)-2-(4,4,5,5-tetramethyl-1,3,2-dioxaborolan-2-yl)ethyl)piperidine-1-carboxylate (17)**

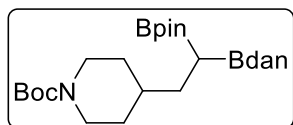

**17**

**The reaction was performed following the general procedure A.** The residue was purified by flash column chromatograph to give the product as a crystalline solid (58.6 mg, 58%)  $^1\text{H NMR}$  (500 MHz,  $\text{CDCl}_3$ )  $\delta$  7.13 – 7.07 (m, 2H), 7.04 – 6.96 (m, 2H), 6.33 – 6.27 (m, 2H), 5.76 (s, 2H), 4.08 (s, 4H), 2.65 (s, 4H), 1.45 (d,  $J = 3.5$  Hz, 9H), 1.24 (s, 12H), 1.06 (d,  $J = 12.2$  Hz, 2H), 0.85 (s, 1H), 0.81 – 0.71 (m, 1H).  $^{13}\text{C NMR}$  (126 MHz,  $\text{CDCl}_3$ )  $\delta$  155.2, 141.2, 136.3, 117.4, 105.5, 83.3, 79.3, 38.0, 33.0, 28.5, 25.0, 24.8, 24.5.  $^{11}\text{B NMR}$  (160 MHz,  $\text{CDCl}_3$ )  $\delta$  33.92, 33.33. **HRMS** (ESI,  $m/z$ ) calcd for  $\text{C}_{21}\text{H}_{31}\text{B}_2\text{N}_2\text{O}_2$   $[\text{M}+\text{H}]^+$ : 365.2566; found: 365.2571.

**2-(2-(cyclohex-1-en-1-yl)-1-(4,4,5,5-tetramethyl-1,3,2-dioxaborolan-2-yl)ethyl)-2,3-dihydro-1H-naphtho[1,8-de][1,3,2]diazaborinine (18)**

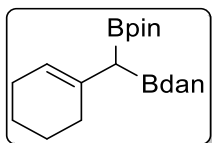

**18**

The reaction was performed following the general procedure A. The residue was purified by flash column chromatograph to give the product as a crystalline solid (51.5 mg, 64%).  $^1\text{H NMR}$  (500 MHz,  $\text{CDCl}_3$ )  $\delta$  7.10 – 7.08 (m, 2H), 6.98 (d,  $J = 4.8$  Hz, 2H), 6.31 (d,  $J = 8.2$  Hz, 2H), 6.05 (s, 2H), 6.00 (s, 1H), 2.26 (s, 1H), 2.19 (s, 1H), 1.67 (t,  $J = 6.1$  Hz, 2H), 1.62 – 1.60 (m, 2H), 1.36 (s, 12H), 1.24 (d,  $J = 4.6$  Hz, 4H), 0.90 – 0.80 (m, 1H).  $^{13}\text{C NMR}$  (126 MHz,  $\text{CDCl}_3$ )  $\delta$  153.6, 136.4, 134.3, 127.6, 117.2, 105.6, 83.8, 26.5, 26.2, 25.0, 24.8, 24.60, 22.4, 22.1.  $^{11}\text{B NMR}$  (160 MHz,  $\text{CDCl}_3$ )  $\delta$  32.80, 31.92. **HRMS** (ESI,  $m/z$ ) calcd for  $\text{C}_{24}\text{H}_{33}\text{B}_2\text{N}_2\text{O}_2$   $[\text{M}+\text{H}]^+$ : 403.2723; found: 403.2725.

**5-(1H-naphtho[1,8-de][1,3,2]diazaborinin-2(3H)-yl)-5-(4,4,5,5-tetramethyl-1,3,2-dioxaborolan-2-yl)pentyl propionate (19)**

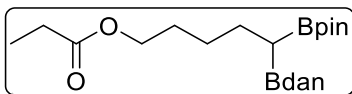

19

The reaction was performed following the general procedure A. The residue was purified by flash column chromatograph to give the product as a crystalline solid (53.2 mg, 61%).  $^1\text{H NMR}$  (500 MHz,  $\text{CDCl}_3$ )  $\delta$  7.11 – 7.06 (m, 2H), 6.99 (d,  $J = 8.2$  Hz, 2H), 6.29 (d,  $J = 7.3$  Hz, 2H), 5.79 (s, 2H), 4.06 (dt,  $J = 9.5, 5.2$  Hz, 2H), 2.33 – 2.31 (m, 1H), 2.31 – 2.28 (m, 1H), 1.61 – 1.51 (m, 2H), 1.48 – 1.37 (m, 2H), 1.36 – 1.26 (m, 2H), 1.25 (s, 6H), 1.23 (s, 6H), 1.12 (t,  $J = 7.6$  Hz, 3H), 0.75 (dd,  $J = 9.3, 6.1$  Hz, 1H).  $^{13}\text{C NMR}$  (126 MHz,  $\text{CDCl}_3$ )  $\delta$  174.6, 141.3, 136.3, 127.5, 119.5, 117.3, 105.5, 83.2, 64.5, 64.3, 28.6, 28.55, 27.6, 26.0, 25.0, 24.9, 24.5, 9.2.  $^{11}\text{B NMR}$  (160 MHz,  $\text{CDCl}_3$ )  $\delta$  34.34, 34.09. **HRMS** (ESI,  $m/z$ ) calcd for  $\text{C}_{24}\text{H}_{35}\text{B}_2\text{N}_2\text{O}_4$   $[\text{M}+\text{H}]^+$ : 437.2777; found: 437.2774.

**2-(4-((tetrahydro-2H-pyran-2-yl)oxy)-1-(4,4,5,5-tetramethyl-1,3,2-dioxaborolan-2-yl)butyl)-2,3-dihydro-1H-naphtho[1,8-de][1,3,2]diazaborinine (20)**

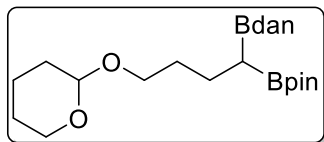

20

The reaction was performed following the general procedure A. The residue was purified by flash column chromatograph to give the product as a crystalline solid (54.0 mg, 60%).  $^1\text{H NMR}$  (500 MHz,  $\text{CDCl}_3$ )  $\delta$  7.09 (t,  $J = 7.8$  Hz, 2H), 6.99 (d,  $J = 8.2$  Hz, 2H), 6.29 (dd,  $J = 7.3, 1.0$  Hz, 2H), 5.87 (d,  $J = 3.9$  Hz, 2H), 4.59 (td,  $J = 4.5, 2.9$  Hz, 1H), 3.91 – 3.86 (m, 1H), 3.81 – 3.75 (m, 1H), 3.53 – 3.49 (m, 1H), 3.43 (dd,  $J = 9.7, 4.8$  Hz, 1H), 1.88 – 1.83 (m, 1H), 1.77 – 1.59 (m, 7H), 1.54 (d,  $J = 6.3$  Hz, 2H), 1.25 (d,  $J = 5.0$  Hz, 12H), 0.80 – 0.76 (m, 1H).  $^{13}\text{C NMR}$  (126 MHz,  $\text{CDCl}_3$ )  $\delta$  141.4, 136.3, 127.5, 119.5, 117.2, 105.4, 99.0, 83.2, 67.57, 67.55, 62.49, 62.47, 32.2, 32.1, 30.8, 25.5, 25.0, 24.9, 24.5, 22.9, 22.8, 19.81, 19.78.  $^{11}\text{B NMR}$  (160 MHz,  $\text{CDCl}_3$ )  $\delta$  33.89, 33.50. **HRMS** (ESI,  $m/z$ ) calcd for  $\text{C}_{25}\text{H}_{37}\text{B}_2\text{N}_2\text{O}_4$   $[\text{M}+\text{H}]^+$ : 451.2934; found: 451.2937.

**2-(3,3-diethoxy-1-(4,4,5,5-tetramethyl-1,3,2-dioxaborolan-2-yl)propyl)-2,3-dihydro-1H-naphtho[1,8-de][1,3,2]diazaborinine (21)**

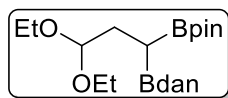

21

The reaction was performed following the general procedure A. The residue was purified by flash column chromatograph to give the product as a crystalline solid (44.1 mg, 52%).  $^1\text{H NMR}$  (500 MHz,  $\text{CDCl}_3$ )  $\delta$  7.10 – 7.06 (m, 2H), 6.98 (d,  $J = 8.3$  Hz, 2H), 6.29 – 6.25 (m, 2H), 5.92 (d,  $J = 31.5$  Hz, 2H), 3.57 – 3.36 (m, 2H), 1.97 – 1.87 (m, 0H), 1.82 (ddt,  $J = 13.4, 9.3, 6.6$  Hz, 0H), 1.25 (d,  $J = 4.0$  Hz, 6H), 1.21 (dt,  $J = 7.0, 3.6$  Hz, 3H), 0.89 – 0.84 (m, 1H).  $^{13}\text{C NMR}$  (126 MHz,  $\text{CDCl}_3$ )  $\delta$  141.37, 141.35, 136.3, 127.5, 117.2, 105.4, 104.2, 61.6, 61.4, 30.2, 26.4, 25.07, 25.03, 24.54, 24.52, 15.40, 15.37.  $^{11}\text{B NMR}$  (160 MHz,  $\text{CDCl}_3$ )  $\delta$  33.51, 32.45. **HRMS** (ESI,  $m/z$ ) calcd for  $\text{C}_{23}\text{H}_{34}\text{B}_2\text{N}_2\text{NaO}_4$  [ $\text{M}+\text{Na}$ ] $^+$ : 447.2597; found: 447.2593.

5-(1H-naphtho[1,8-de][1,3,2]diazaborinin-2(3H)-yl)-5-(4,4,5,5-tetramethyl-1,3,2-dioxaborolan-2-yl)pentyl (2E,4E)-hexa-2,4-dienoate (22)

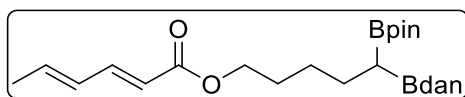

22

The reaction was performed following the general procedure A. The residue was purified by flash column chromatograph to give the product as a crystalline solid (45.5 mg, 48%).  $^1\text{H NMR}$  (500 MHz,  $\text{CDCl}_3$ )  $\delta$  7.08 (dd,  $J = 8.3, 7.3$  Hz, 2H), 6.99 (dd,  $J = 8.3, 1.0$  Hz, 2H), 6.29 (dd,  $J = 7.3, 1.0$  Hz, 2H), 5.79 (s, 2H), 5.60 – 5.27 (m, 4H), 4.07 (dt,  $J = 6.6, 3.4$  Hz, 2H), 2.35 – 2.32 (m, 2H), 2.30 – 2.27 (m, 2H), 1.63 (d,  $J = 1.2$  Hz, 3H), 1.45 – 1.36 (m, 2H), 1.26 (s, 3H), 1.25 (s, 6H), 1.23 (s, 3H), 0.74 (dd,  $J = 9.3, 6.2$  Hz, 1H).  $^{13}\text{C NMR}$  (126 MHz,  $\text{CDCl}_3$ )  $\delta$  173.4, 141.3, 136.3, 129.2, 127.6, 126.1, 117.3, 105.5, 83.2, 64.3, 34.4, 28.8, 28.6, 27.9, 26.0, 25.0, 24.8, 24.5, 17.9.  $^{11}\text{B NMR}$  (160 MHz,  $\text{CDCl}_3$ )  $\delta$  34.45, 33.68. **HRMS** (ESI,  $m/z$ ) calcd for  $\text{C}_{27}\text{H}_{37}\text{B}_2\text{N}_2\text{O}_4$  [ $\text{M}+\text{H}$ ] $^+$ : 475.2934; found: 475.2929.

5-(1H-naphtho[1,8-de][1,3,2]diazaborinin-2(3H)-yl)-5-(4,4,5,5-tetramethyl-1,3,2-dioxaborolan-2-yl)pentyl 2-propylpentanoate (23)

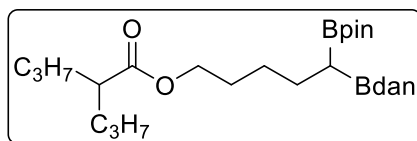

23

The reaction was performed following the general procedure A. The residue was purified by flash column chromatograph to give the product as a crystalline solid (64.8 mg, 64%).  $^1\text{H NMR}$  (500 MHz,  $\text{CDCl}_3$ )  $\delta$  7.08 (t,  $J = 7.8$  Hz, 2H), 6.98 (d,  $J = 8.2$  Hz, 2H), 6.29 (d,  $J = 7.3$  Hz, 2H), 5.79 (s, 2H), 4.07 – 4.03 (m, 2H), 2.35 – 2.32 (m, 1H), 1.66 (d,  $J = 7.1$  Hz, 2H), 1.57 (dd,  $J = 10.5, 4.9$  Hz, 4H), 1.41 – 1.36 (m, 4H), 1.27 (d,  $J = 7.7$  Hz, 4H), 1.24 (s, 3H), 1.23 (d,  $J = 2.4$  Hz, 6H), 1.22 (s, 3H), 0.88 (d,  $J = 5.4$  Hz, 6H), 0.75 – 0.72 (m, 1H).  $^{13}\text{C NMR}$  (126 MHz,  $\text{CDCl}_3$ )  $\delta$  176.7, 141.3, 136.3, 127.5, 119.5, 117.3, 105.5, 83.2, 83.0, 64.0, 45.4,

34.7, 28.9, 28.8, 28.6, 26.1, 25.0, 24.9, 24.5, 20.6, 14.0.  $^{11}\text{B}$  NMR (160 MHz,  $\text{CDCl}_3$ )  $\delta$  34.80, 34.45. HRMS (ESI,  $m/z$ ) calcd for  $\text{C}_{29}\text{H}_{45}\text{B}_2\text{N}_2\text{O}_4$   $[\text{M}+\text{H}]^+$ : 507.3560; found: 507.3559.

**5-(1H-naphtho[1,8-de][1,3,2]diazaborinin-2(3H)-yl)-5-(4,4,5,5-tetramethyl-1,3,2-dioxaborolan-2-yl)pentyl 1-phenylcyclopentane-1-carboxylate (24)**

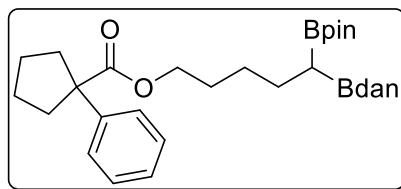

**24**

The reaction was performed following the general procedure A. The residue was purified by flash column chromatography to give the product as a crystalline solid (46.4 mg, 42%).  $^1\text{H}$  NMR (500 MHz,  $\text{CDCl}_3$ )  $\delta$  7.32 (d,  $J = 7.8$  Hz, 3H), 7.25 (s, 1H), 7.17 (d,  $J = 7.4$  Hz, 1H), 7.07 (t,  $J = 7.8$  Hz, 2H), 6.97 (d,  $J = 8.3$  Hz, 2H), 6.27 (d,  $J = 7.3$  Hz, 2H), 5.74 (s, 2H), 3.98 (d,  $J = 5.3$  Hz, 2H), 2.62 (dd,  $J = 12.6, 6.2$  Hz, 2H), 1.85 (d,  $J = 11.0$  Hz, 2H), 1.70 – 1.65 (m, 4H), 1.57 – 1.49 (m, 4H), 1.25 (s, 2H), 1.21 (d,  $J = 7.6$  Hz, 12H), 0.65 (t,  $J = 7.6$  Hz, 1H).  $^{13}\text{C}$  NMR (126 MHz,  $\text{CDCl}_3$ )  $\delta$  176.0, 143.5, 141.3, 136.3, 128.2, 127.5, 126.9, 126.6, 117.3, 105.5, 83.2, 64.8, 59.2, 36.1, 28.7, 28.5, 26.0, 24.99, 24.52, 23.6.  $^{11}\text{B}$  NMR (160 MHz,  $\text{CDCl}_3$ )  $\delta$  35.15, 34.45. HRMS (ESI,  $m/z$ ) calcd for  $\text{C}_{33}\text{H}_{43}\text{B}_2\text{N}_2\text{O}_4$   $[\text{M}+\text{H}]^+$ : 553.3403; found: 553.3398.

**5-(1H-naphtho[1,8-de][1,3,2]diazaborinin-2(3H)-yl)-5-(4,4,5,5-tetramethyl-1,3,2-dioxaborolan-2-yl)pentyl (2R)-2-phenylpropanoate (25)**

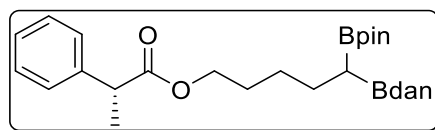

**25**

The reaction was performed following the Condition A. The residue was purified by flash column chromatography (PE:EA=30:1) to give the product as a yellow oil liquid (60.4 mg, 59%).  $^1\text{H}$  NMR (500 MHz,  $\text{CDCl}_3$ )  $\delta$  7.34 – 7.30 (m, 3H), 7.24 (ddt,  $J = 8.4, 5.9, 3.4$  Hz, 2H), 7.10 (t,  $J = 7.8$  Hz, 2H), 7.00 (d,  $J = 8.3$  Hz, 2H), 6.30 (d,  $J = 7.2$  Hz, 2H), 5.79 (s, 2H), 4.08 (t,  $J = 7.0$  Hz, 2H), 3.70 (d,  $J = 7.2$  Hz, 1H), 1.61 (d,  $J = 7.3$  Hz, 2H), 1.49 (d,  $J = 7.2$  Hz, 3H), 1.36 – 1.27 (m, 4H), 1.25 (s, 6H), 1.23 (s, 6H), 0.71 (dd,  $J = 9.5, 6.0$  Hz, 1H).  $^{13}\text{C}$  NMR (126 MHz,  $\text{CDCl}_3$ )  $\delta$  174.6, 141.3, 140.7, 136.3, 128.6, 127.6, 127.5, 127.1, 119.5, 117.3, 105.5, 83.2, 83.0, 64.7, 45.6, 28.7, 28.5, 26.0, 25.98, 25.0, 24.9, 24.54, 24.52, 18.5.  $^{11}\text{B}$  NMR (160 MHz,  $\text{CDCl}_3$ )  $\delta$  34.44, 33.92. HRMS (ESI,  $m/z$ ) calcd for  $\text{C}_{30}\text{H}_{39}\text{B}_2\text{N}_2\text{O}_4$   $[\text{M}+\text{H}]^+$ : 513.3090; found: 513.3094. HPLC analysis: HPLC DAICEL CHIRALCEL OD, hexane/isopropanol = 90/10, 0.5 mL/min,  $\lambda = 280$  nm,  $t_{\text{R}}$  (major) = 14.5 min,  $t_{\text{R}}$  (minor) = 16.2 min,  $d_r \approx 1:1$ .

**5-(1H-naphtho[1,8-de][1,3,2]diazaborinin-2(3H)-yl)-5-(4,4,5,5-tetramethyl-1,3,2-dioxaborolan-2-yl)pentyl benzoate (26)**



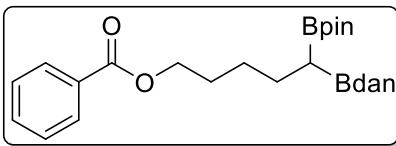

26

The reaction was performed following the general procedure A. The residue was purified by flash column chromatograph to give the product as a crystalline solid (63.9 mg, 66%). <sup>1</sup>H NMR (500 MHz, CDCl<sub>3</sub>) δ 8.06 (d, *J* = 1.4 Hz, 1H), 8.05 (d, *J* = 1.7 Hz, 1H), 7.55 – 7.52 (m, 1H), 7.41 (t, *J* = 7.8 Hz, 2H), 7.10 (t, *J* = 7.8 Hz, 2H), 7.01 (d, *J* = 8.3 Hz, 2H), 6.30 (d, *J* = 7.3 Hz, 2H), 5.84 (s, 2H), 4.35 (t, *J* = 6.6 Hz, 2H), 1.82 (t, *J* = 7.0 Hz, 2H), 1.67 – 1.47 (m, 4H), 1.25 (s, 6H), 1.23 (s, 6H), 0.80 (dd, *J* = 9.4, 5.7 Hz, 1H). <sup>13</sup>C NMR (126 MHz, CDCl<sub>3</sub>) δ 166.7, 141.3, 136.3, 132.8, 130.5, 129.6, 128.3, 127.6, 119.6, 117.3, 105.5, 83.2, 64.9, 28.9, 28.7, 26.1, 25.0, 24.87, 24.54, 24.51. <sup>11</sup>B NMR (160 MHz, CDCl<sub>3</sub>) δ 33.92, 32.98. HRMS (ESI, *m/z*) calcd for C<sub>28</sub>H<sub>35</sub>B<sub>2</sub>N<sub>2</sub>O<sub>4</sub> [M+H]<sup>+</sup>: 485.2777; found: 485.2773.

5-(1H-naphtho[1,8-de][1,3,2]diazaborinin-2(3H)-yl)-5-(4,4,5,5-tetramethyl-1,3,2-dioxaborolan-2-yl)pentyl (2S)-2-(4-isobutylphenyl)propanoate (27)

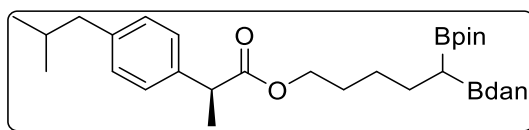

27

The reaction was performed following the general procedure A. The residue was purified by flash column chromatograph to give the product as a crystalline solid (67.1 mg, 59%). <sup>1</sup>H NMR (500 MHz, CDCl<sub>3</sub>) δ 7.18 (d, *J* = 8.0 Hz, 2H), 7.08 (dd, *J* = 9.3, 1.8 Hz, 4H), 7.00 (d, *J* = 7.7 Hz, 2H), 6.30 (d, *J* = 7.3 Hz, 2H), 5.78 (s, 2H), 4.06 (dd, *J* = 11.4, 4.7 Hz, 2H), 3.67 (d, *J* = 7.1 Hz, 1H), 2.43 (d, *J* = 7.2 Hz, 2H), 1.83 (dd, *J* = 11.1, 4.4 Hz, 1H), 1.63 – 1.54 (m, 4H), 1.48 – 1.46 (m, 3H), 1.36 – 1.31 (m, 2H), 1.24 (d, *J* = 7.3 Hz, 12H), 0.90 (d, *J* = 1.0 Hz, 6H), 0.71 (dd, *J* = 8.0, 4.7 Hz, 1H). <sup>13</sup>C NMR (126 MHz, CDCl<sub>3</sub>) δ 174.9, 141.3, 140.4, 137.8, 136.3, 129.3, 127.5, 127.1, 119.5, 117.3, 105.5, 83.2, 83.0, 64.6, 45.2, 45.0, 30.2, 28.7, 28.5, 26.0, 25.0, 24.9, 24.5, 24.5, 22.4, 18.5. <sup>11</sup>B NMR (160 MHz, CDCl<sub>3</sub>) δ 34.62, 34.09. HRMS (ESI, *m/z*) calcd for C<sub>34</sub>H<sub>47</sub>B<sub>2</sub>N<sub>2</sub>O<sub>4</sub> [M+H]<sup>+</sup>: 569.3716; found: 569.3713. HPLC analysis: HPLC DAICEL CHIRALCEL OD, hexane/isopropanol = 90/10, 1.0 mL/min, λ = 280 nm, t<sub>R</sub> (minor) = 5.6 min, t<sub>R</sub> (major) = 6.4 min, dr ≈ 1:1.

5-(1H-naphtho[1,8-de][1,3,2]diazaborinin-2(3H)-yl)-5-(4,4,5,5-tetramethyl-1,3,2-dioxaborolan-2-yl)pentyl (E)-2-methyl-3-phenylacrylate (28)

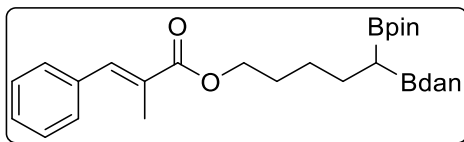

28

The reaction was performed following the general procedure A. The residue was purified by flash column chromatograph to give the product as a crystalline solid (61.9 mg, 59%). <sup>1</sup>H NMR (500 MHz, CDCl<sub>3</sub>) δ 7.69

(s, 1H), 7.41 – 7.37 (m, 4H), 7.32 (q,  $J = 5.2, 4.4$  Hz, 1H), 7.08 (t,  $J = 7.7$  Hz, 2H), 7.00 (d,  $J = 8.3$  Hz, 2H), 6.29 (d,  $J = 7.2$  Hz, 2H), 5.81 (s, 2H), 4.24 (td,  $J = 6.6, 1.9$  Hz, 2H), 2.11 (s, 3H), 1.76 (q,  $J = 7.1$  Hz, 2H), 1.65 – 1.43 (m, 4H), 1.24 (d,  $J = 6.7$  Hz, 12H), 0.90 (t,  $J = 6.8$  Hz, 1H).  $^{13}\text{C}$  NMR (126 MHz,  $\text{CDCl}_3$ )  $\delta$  168.8, 141.3, 138.7, 136.3, 135.96, 129.65, 128.36, 128.25, 127.56, 119.52, 117.30, 105.50, 83.25, 64.93, 28.87, 28.77, 26.12, 25.04, 24.51, 14.08.  $^{11}\text{B}$  NMR (160 MHz,  $\text{CDCl}_3$ )  $\delta$  33.24, 33.15. HRMS (ESI,  $m/z$ ) calcd for  $\text{C}_{31}\text{H}_{39}\text{B}_2\text{N}_2\text{O}_4$   $[\text{M}+\text{H}]^+$ : 525.3090; found: 525.3092.

**5-(1H-naphtho[1,8-de][1,3,2]diazaborinin-2(3H)-yl)-5-(4,4,5,5-tetramethyl-1,3,2-dioxaborolan-2-yl)pentyl (1R,2S,4R)-bicyclo[2.2.1]hept-5-ene-2-carboxylate (29)**

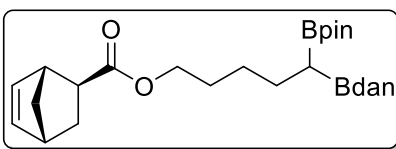

**29**

The reaction was performed following the general procedure A. The residue was purified by flash column chromatograph to give the product as a crystalline solid (63.0 mg, 63%).  $^1\text{H}$  NMR (500 MHz,  $\text{CDCl}_3$ )  $\delta$  7.09 (t,  $J = 7.7$  Hz, 2H), 6.99 (d,  $J = 8.2$  Hz, 2H), 6.29 (d,  $J = 7.2$  Hz, 2H), 6.12 (dd,  $J = 5.7, 3.1$  Hz, 1H), 6.09 – 6.06 (m, 1H), 5.79 (s, 2H), 4.11 – 4.07 (m, 2H), 3.02 (s, 1H), 2.89 (s, 1H), 2.22 – 2.19 (m, 1H), 1.93 – 1.89 (m, 1H), 1.67 (dd,  $J = 12.3, 5.1$  Hz, 4H), 1.50 (s, 1H), 1.39 – 1.31 (m, 4H), 1.24 (d,  $J = 6.6$  Hz, 12H), 0.75 (dd,  $J = 9.4, 6.1$  Hz, 1H).  $^{13}\text{C}$  NMR (126 MHz,  $\text{CDCl}_3$ )  $\delta$  175.1, 141.3, 136.3, 127.5, 117.3, 105.5, 83.2, 64.2, 46.1, 40.5, 40.1, 37.0, 31.9, 29.1, 28.9, 28.64, 28.62, 26.1, 25.02, 25.01, 24.9, 24.8, 24.53, 24.51.  $^{11}\text{B}$  NMR (160 MHz,  $\text{CDCl}_3$ )  $\delta$  35.22, 34.45. HRMS (ESI,  $m/z$ ) calcd for  $\text{C}_{29}\text{H}_{38}^{10}\text{B}_2\text{KN}_2\text{O}_4$   $[\text{M}+\text{K}]^+$ : 537.2722; found: 537.2725. HPLC analysis: HPLC DAICEL CHIRALCEL AD, hexane/isopropanol = 97/3, 0.5 mL/min,  $\lambda = 280$  nm,  $t_{\text{R}}$  (major) = 19.4 min,  $t_{\text{R}}$  (minor) = 21.0 min,  $d_r \approx 1:1$ .

**5-(1H-naphtho[1,8-de][1,3,2]diazaborinin-2(3H)-yl)-5-(4,4,5,5-tetramethyl-1,3,2-dioxaborolan-2-yl)pentyl 2,3-dihydrobenzo[b][1,4]dioxine-2-carboxylate (30)**

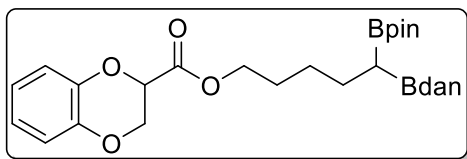

**30**

The reaction was performed following the general procedure A. The residue was purified by flash column chromatograph to give the product as a crystalline solid (66.6 mg, 59%).  $^1\text{H}$  NMR (500 MHz,  $\text{CDCl}_3$ )  $\delta$  7.09 (t,  $J = 7.7$  Hz, 2H), 6.99 (d,  $J = 7.6$  Hz, 3H), 6.86 (d,  $J = 1.6$  Hz, 3H), 6.30 (d,  $J = 7.3$  Hz, 2H), 5.79 (s, 2H), 4.81 (dd,  $J = 3.9, 2.8$  Hz, 1H), 4.39 – 4.32 (m, 2H), 4.22 (dt,  $J = 13.8, 5.0$  Hz, 2H), 1.69 – 1.65 (m, 2H), 1.60 (d,  $J = 5.7$  Hz, 1H), 1.56 – 1.49 (m, 1H), 1.41 – 1.33 (m, 2H), 1.24 (d,  $J = 7.2$  Hz, 12H), 0.72 (dd,  $J = 9.0, 6.3$  Hz, 1H).  $^{13}\text{C}$  NMR (126 MHz,  $\text{CDCl}_3$ )  $\delta$  168.1, 143.0, 142.4, 141.3, 136.3, 127.6, 126.2, 122.2, 121.8,

119.8, 119.5, 117.4, 117.34, 117.28, 111.6, 105.5, 83.3, 83.0, 72.1, 65.9, 65.9, 65.0, 31.6, 28.6, 28.4, 28.3, 26.0, 25.9, 25.0, 24.9, 24.5, 22.7, 14.1.  $^{11}\text{B}$  NMR (160 MHz,  $\text{CDCl}_3$ )  $\delta$  33.33, 32.34. HRMS (ESI,  $m/z$ ) calcd for  $\text{C}_{30}\text{H}_{36}\text{B}_2\text{N}_2\text{NaO}_6$   $[\text{M}+\text{Na}]^+$ : 565.2652; found: 565.2644.

**5-(1H-naphtho[1,8-de][1,3,2]diazaborinin-2(3H)-yl)-5-(4,4,5,5-tetramethyl-1,3,2-dioxaborolan-2-yl)pentyl 6-(3-(bicyclo[3.3.1]nonan-1-yl)-4-methoxyphenyl)-2-naphthoate (31)**

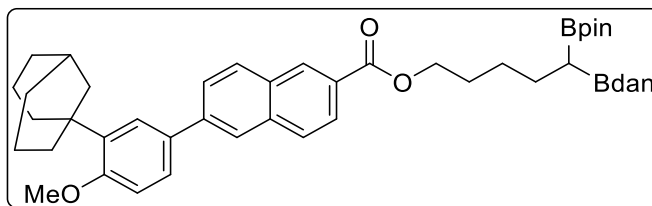

**31**

The reaction was performed following the general procedure A. The residue was purified by flash column chromatograph to give the product as a crystalline solid (73.2 mg, 48%).  $^1\text{H}$  NMR (500 MHz,  $\text{CDCl}_3$ )  $\delta$  8.63 (d,  $J = 1.7$  Hz, 1H), 8.09 (dd,  $J = 8.6, 1.8$  Hz, 1H), 8.08 – 7.73 (m, 5H), 7.64 (d,  $J = 2.4$  Hz, 1H), 7.56 (dd,  $J = 8.4, 2.3$  Hz, 1H), 7.10 (dd,  $J = 8.3, 7.3$  Hz, 2H), 7.02 – 7.02 (m, 1H), 7.01 – 7.00 (m, 1H), 6.30 (dd,  $J = 7.2, 1.0$  Hz, 2H), 5.85 (s, 2H), 4.44 (td,  $J = 6.5, 1.5$  Hz, 2H), 3.92 (s, 3H), 2.23 (d,  $J = 3.0$  Hz, 6H), 2.16 – 2.12 (m, 3H), 1.89 (t,  $J = 7.0$  Hz, 2H), 1.84 (s, 6H), 1.78 – 1.75 (m, 1H), 1.68 – 1.60 (m, 2H), 1.26 (d,  $J = 7.3$  Hz, 12H), 0.94 – 0.90 (m, 1H), 0.84 (dd,  $J = 9.5, 5.4$  Hz, 1H).  $^{13}\text{C}$  NMR (126 MHz,  $\text{CDCl}_3$ )  $\delta$  166.9, 159.0, 141.3, 139.0, 136.3, 136.0, 132.6, 131.3, 130.8, 129.7, 128.2, 127.6, 127.3, 126.5, 126.0, 125.8, 125.6, 124.7, 119.6, 117.3, 112.2, 105.6, 83.3, 65.1, 55.2, 40.7, 37.3, 37.2, 31.6, 29.2, 29.0, 28.9, 26.2, 25.1, 24.5, 22.7, 14.2.  $^{11}\text{B}$  NMR (160 MHz,  $\text{CDCl}_3$ )  $\delta$  36.03, 35.68. HRMS (ESI,  $m/z$ ) calcd for  $\text{C}_{48}\text{H}_{57}\text{B}_2\text{N}_2\text{O}_5$   $[\text{M}+\text{H}]^+$ : 763.4448; found: 763.4443.

**5-(1H-naphtho[1,8-de][1,3,2]diazaborinin-2(3H)-yl)-5-(4,4,5,5-tetramethyl-1,3,2-dioxaborolan-2-yl)pentyl 2S)-2-(6-methoxynaphthalen-2-yl)propanoate (32)**

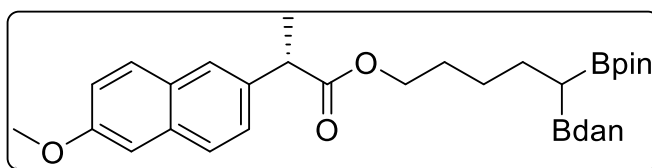

**32**

The reaction was performed following the general procedure A. The residue was purified by flash column chromatograph to give the product as a crystalline solid (68.7 mg, 58%).  $^1\text{H}$  NMR (500 MHz,  $\text{CDCl}_3$ )  $\delta$  7.71 – 7.67 (m, 3H), 7.42 (dd,  $J = 8.5, 1.9$  Hz, 1H), 7.17 – 7.12 (m, 2H), 7.11 – 7.10 (m, 2H), 7.02 (d,  $J = 8.2$  Hz, 2H), 6.31 (d,  $J = 7.3$  Hz, 2H), 5.78 (s, 2H), 4.11 (t,  $J = 6.8$  Hz, 2H), 3.90 (d,  $J = 5.2$  Hz, 3H), 3.85 (d,  $J = 7.1$  Hz, 1H), 1.63 (d,  $J = 7.4$  Hz, 2H), 1.59 (d,  $J = 7.1$  Hz, 3H), 1.50 (ddt,  $J = 16.8, 12.9, 6.9$  Hz, 2H), 1.32 – 1.29 (m, 2H), 1.25 (s, 6H), 1.23 (s, 6H), 0.85 (dd, 1H).  $^{13}\text{C}$  NMR (126 MHz,  $\text{CDCl}_3$ )  $\delta$  174.8, 157.6, 141.3, 136.3, 135.9, 133.7, 129.3, 129.0, 127.6, 127.1, 126.3, 125.9, 119.6, 119.0, 117.3, 105.5, 83.2, 64.7, 55.3, 45.6, 29.8,

28.7, 28.5, 25.97, 25.95, 25.0, 24.9, 24.5, 18.5.  $^{11}\text{B}$  NMR (160 MHz,  $\text{CDCl}_3$ )  $\delta$  34.62, 33.51. **HRMS** (ESI,  $m/z$ ) calcd for  $\text{C}_{35}\text{H}_{43}\text{B}_2\text{N}_2\text{O}_5$   $[\text{M}+\text{H}]^+$ :593.3353; found: 593.3346. **HPLC analysis**: HPLC DAICEL CHIRALCEL OD, hexane/isopropanol = 90/10, 0.5 mL/min,  $\lambda$  = 250 nm,  $t_{\text{R}}$  (minor) = 9.4 min,  $t_{\text{R}}$  (major) = 11.8 min, dr = 0.94:1.

**5-(1H-naphtho[1,8-de][1,3,2]diazaborinin-2(3H)-yl)-5-(4,4,5,5-tetramethyl-1,3,2-dioxaborolan-2-yl)pentyl 4-cyclohexylbenzoate (33)**

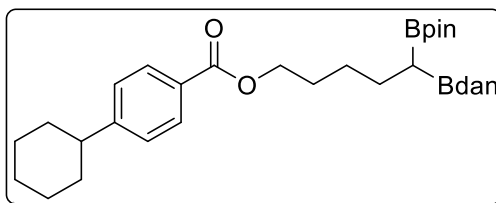

**33**

The reaction was performed following the general procedure A. The residue was purified by flash column chromatograph to give the product as a crystalline solid (77.0 mg, 68%).  $^1\text{H}$  NMR (500 MHz,  $\text{CDCl}_3$ )  $\delta$  7.96 (s, 1H), 7.95 (s, 1H), 7.22 (d,  $J$  = 8.3 Hz, 2H), 7.11 – 7.07 (m, 2H), 7.00 (d,  $J$  = 8.2 Hz, 2H), 6.29 (d,  $J$  = 7.3 Hz, 2H), 5.82 (s, 2H), 4.32 (t,  $J$  = 6.5 Hz, 2H), 2.56 – 2.52 (m, 1H), 1.87 – 1.85 (m, 4H), 1.79 (d,  $J$  = 6.9 Hz, 2H), 1.76 (t,  $J$  = 3.7 Hz, 2H), 1.66 – 1.58 (m, 2H), 1.57 – 1.50 (m, 2H), 1.40 (dd,  $J$  = 8.5, 3.7 Hz, 4H), 1.24 (s, 6H), 1.22 (s, 6H), 0.79 (ddd,  $J$  = 9.5, 6.2, 2.8 Hz, 1H).  $^{13}\text{C}$  NMR (126 MHz,  $\text{CDCl}_3$ )  $\delta$  166.8, 141.3, 129.7, 127.6, 126.8, 117.3, 105.5, 83.2, 64.7, 44.7, 34.2, 28.9, 28.8, 26.8, 26.1, 25.0, 24.9, 24.5, 24.5.  $^{11}\text{B}$  NMR (160 MHz,  $\text{CDCl}_3$ )  $\delta$  34.71, 33.02. **HRMS** (ESI,  $m/z$ ) calcd for  $\text{C}_{34}\text{H}_{45}\text{B}_2\text{N}_2\text{O}_4$   $[\text{M}+\text{H}]^+$ :567.3560; found: 567.3560.

**2-(2-phenyl-1-(4,4,5,5-tetramethyl-1,3,2-dioxaborolan-2-yl)ethyl)-2,3-dihydro-1H-naphtho[1,8-de][1,3,2]diazaborinine (34)**

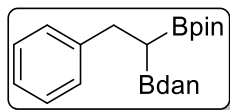

**34**

The reaction was performed following the general procedure A. The residue was purified by flash column chromatograph to give the product as a crystalline solid (45.4 mg, 57%).  $^1\text{H}$  NMR (500 MHz,  $\text{CDCl}_3$ )  $\delta$  7.25 (s, 4H), 7.17 – 7.14 (m, 1H), 7.08 (t,  $J$  = 7.8 Hz, 2H), 6.99 (d,  $J$  = 8.2 Hz, 2H), 6.27 (d,  $J$  = 7.3 Hz, 2H), 5.81 (s, 2H), 2.96 (dd,  $J$  = 14.1, 9.6 Hz, 1H), 2.91 – 2.86 (m, 1H), 1.28 – 1.25 (m, 1H), 1.18 (s, 6H), 1.16 (s, 6H).  $^{13}\text{C}$  NMR (126 MHz,  $\text{CDCl}_3$ )  $\delta$  143.7, 141.2, 136.3, 128.3, 128.2, 127.5, 125.7, 119.5, 117.3, 105.5, 83.4, 32.0, 24.9, 24.5.  $^{11}\text{B}$  NMR (160 MHz,  $\text{CDCl}_3$ )  $\delta$  34.27, 33.68. **HRMS** (ESI,  $m/z$ ) calcd for  $\text{C}_{24}\text{H}_{29}\text{B}_2\text{N}_2\text{O}_2$   $[\text{M}+\text{H}]^+$ : 399.2410; found: 399.2418.

**2-(1-(4,4,5,5-tetramethyl-1,3,2-dioxaborolan-2-yl)-2-(p-tolyl)ethyl)-2,3-dihydro-1H-naphtho[1,8-de][1,3,2]diazaborinine (35)**

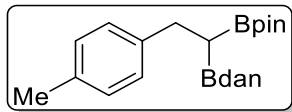

35

The reaction was performed following the general procedure A. The residue was purified by flash column chromatograph to give the product as a crystalline solid (42.9 mg, 52%).  $^1\text{H NMR}$  (500 MHz,  $\text{CDCl}_3$ )  $\delta$  7.17 (d,  $J = 7.8$  Hz, 2H), 7.11 – 7.07 (m, 4H), 7.00 (d,  $J = 8.2$  Hz, 2H), 6.28 (d,  $J = 7.3$  Hz, 2H), 5.83 (s, 2H), 2.95 (dd,  $J = 14.2, 9.3$  Hz, 1H), 2.87 (t,  $J = 4.7$  Hz, 1H), 2.32 (s, 3H), 1.20-1.26 (m, 1H), 1.21 (s, 6H), 1.19 (s, 6H).  $^{13}\text{C NMR}$  (126 MHz,  $\text{CDCl}_3$ )  $\delta$  141.3, 140.6, 136.3, 135.1, 129.0, 128.1, 127.6, 119.6, 117.3, 105.5, 83.4, 31.5, 29.7, 25.0, 24.8, 24.5, 21.0.  $^{11}\text{B NMR}$  (160 MHz,  $\text{CDCl}_3$ )  $\delta$  34.27, 34.09. **HRMS** (ESI,  $m/z$ ) calcd for  $\text{C}_{25}\text{H}_{30}\text{B}_2\text{N}_2\text{NaO}_2$   $[\text{M}+\text{Na}]^+$ : 435.2386; found: 435.2381.

2-(2-(4-ethylphenyl)-1-(4,4,5,5-tetramethyl-1,3,2-dioxaborolan-2-yl)ethyl)-2,3-dihydro-1H-naphtho[1,8-de][1,3,2]diazaborinine (36)

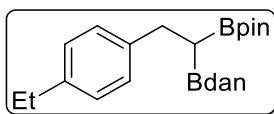

36

The reaction was performed following the general procedure A. The residue was purified by flash column chromatograph to give the product as a crystalline solid (37.9 mg, 46%).  $^1\text{H NMR}$  (500 MHz,  $\text{CDCl}_3$ )  $\delta$  7.14 (d,  $J = 7.9$  Hz, 2H), 7.10 – 7.05 (m, 4H), 6.98 (d,  $J = 8.2$  Hz, 2H), 6.26 (d,  $J = 7.3$  Hz, 2H), 5.81 (s, 2H), 2.93 (dd,  $J = 14.2, 9.3$  Hz, 1H), 2.84 (dd,  $J = 14.2, 6.8$  Hz, 1H), 2.30 (s, 3H), 1.26 (s, 2H), 1.18 (d,  $J = 8.4$  Hz, 12H), 1.15 – 1.13 (m, 1H).  $^{13}\text{C NMR}$  (126 MHz,  $\text{CDCl}_3$ )  $\delta$  141.2 (s), 140.6 (s), 135.1 (s), 128.9 (s), 128.0 (s), 127.5 (s), 117.3 (s), 105.5 (s), 83.3 (s), 31.5 (s), 25.0 (s), 24.5 (s), 21.0 (s).  $^{11}\text{B NMR}$  (160 MHz,  $\text{CDCl}_3$ )  $\delta$  34.45, 34.09. **HRMS** (ESI,  $m/z$ ) calcd for  $\text{C}_{26}\text{H}_{33}\text{B}_2\text{N}_2\text{O}_2$   $[\text{M}+\text{H}]^+$ : 427.2723; found: 427.2722.

2-(2-(4-(tert-butyl)phenyl)-1-(4,4,5,5-tetramethyl-1,3,2-dioxaborolan-2-yl)ethyl)-2,3-dihydro-1H-naphtho[1,8-de][1,3,2]diazaborinine (37)

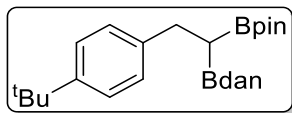

37

The reaction was performed following the general procedure A. The residue was purified by flash column chromatograph to give the product as a crystalline solid (56.3 mg, 62%).  $^1\text{H NMR}$  (500 MHz,  $\text{CDCl}_3$ )  $\delta$  7.31 – 7.28 (m, 2H), 7.20 (d,  $J = 8.3$  Hz, 2H), 7.09 (dd,  $J = 8.3, 7.3$  Hz, 2H), 7.00 (dd,  $J = 8.4, 1.0$  Hz, 2H), 6.27 (d,  $J = 7.3$  Hz, 2H), 5.82 (s, 2H), 2.97 – 2.85 (m, 2H), 1.30 (s, 9H), 1.24 (d,  $J = 4.3$  Hz, 1H), 1.19 (s, 6H), 1.17 (s, 6H).  $^{13}\text{C NMR}$  (126 MHz,  $\text{CDCl}_3$ )  $\delta$  141.3, 140.6, 136.3, 127.8, 127.5, 125.1, 117.3, 105.5, 83.3, 34.3, 31.4, 24.9, 24.5.  $^{11}\text{B NMR}$  (160 MHz,  $\text{CDCl}_3$ )  $\delta$  34.62, 33.92. **HRMS** (ESI,  $m/z$ ) calcd for  $\text{C}_{28}\text{H}_{36}\text{B}_2\text{KN}_2\text{O}_2$   $[\text{M}+\text{K}]^+$ : 493.2594; found: 493.2588.

2-(2-(4-isopropylphenyl)-1-(4,4,5,5-tetramethyl-1,3,2-dioxaborolan-2-yl)ethyl)-2,3-dihydro-1H-

naphtho[1,8-de][1,3,2]diazaborinine (38)

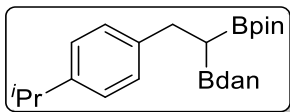

38

The reaction was performed following the general procedure A. The residue was purified by flash column chromatograph to give the product as a crystalline solid (31.7 mg, 36%). <sup>1</sup>H NMR (500 MHz, CDCl<sub>3</sub>) δ 7.19 (d, *J* = 8.2 Hz, 2H), 7.13 (d, *J* = 8.2 Hz, 2H), 7.09 (dd, *J* = 8.3, 7.3 Hz, 2H), 7.00 (dd, *J* = 8.4, 1.0 Hz, 2H), 6.27 (dd, *J* = 7.3, 1.0 Hz, 2H), 5.82 (s, 2H), 2.94 (dd, *J* = 14.2, 9.3 Hz, 1H), 2.87 (ddd, *J* = 13.7, 6.9, 2.1 Hz, 2H), 1.23 (d, *J* = 6.9 Hz, 6H), 1.19 (s, 1H), 1.18 (d, *J* = 6.9 Hz, 12H). <sup>13</sup>C NMR (126 MHz, CDCl<sub>3</sub>) δ 141.2, 141.0, 136.3, 128.1, 127.5, 126.3, 117.3, 105.5, 83.3, 33.7, 31.5, 24.9, 24.5, 24.1. <sup>11</sup>B NMR (160 MHz, CDCl<sub>3</sub>) δ 33.33, 32.10. HRMS (ESI, *m/z*) calcd for C<sub>27</sub>H<sub>34</sub>B<sub>2</sub>N<sub>2</sub>NaO<sub>2</sub> [M+Na]<sup>+</sup>: 463.2699; found: 463.2706.

2-(2-(4-butylphenyl)-1-(4,4,5,5-tetramethyl-1,3,2-dioxaborolan-2-yl)ethyl)-2,3-dihydro-1H-naphtho[1,8-de][1,3,2]diazaborinine (39)

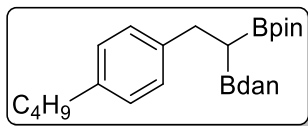

39

The reaction was performed following the general procedure A. The residue was purified by flash column chromatograph to give the product as a crystalline solid (40.9 mg, 45 %). <sup>1</sup>H NMR (500 MHz, CDCl<sub>3</sub>) δ 7.17 (d, *J* = 8.0 Hz, 2H), 7.08 (t, *J* = 7.8 Hz, 4H), 6.99 (d, *J* = 8.2 Hz, 2H), 6.26 (d, *J* = 7.3 Hz, 2H), 5.81 (s, 2H), 2.93 (dd, *J* = 14.1, 9.4 Hz, 1H), 2.86 (dd, *J* = 14.2, 6.9 Hz, 1H), 2.58 – 2.54 (m, 2H), 1.58 – 1.53 (m, 2H), 1.36 – 1.31 (m, 2H), 1.27 (d, *J* = 7.4 Hz, 1H), 1.18 (s, 6H), 1.17 (s, 6H), 0.91 (t, *J* = 7.3 Hz, 3H). <sup>13</sup>C NMR (126 MHz, CDCl<sub>3</sub>) δ 141.2, 140.8, 140.2, 136.3, 128.3, 128.0, 127.5, 119.5, 117.3, 105.5, 83.3, 35.2, 33.7, 31.6, 24.9, 24.5, 22.3, 14.0. <sup>11</sup>B NMR (160 MHz, CDCl<sub>3</sub>) δ 34.09, 33.51.

HRMS (ESI, *m/z*) calcd for C<sub>28</sub>H<sub>36</sub>B<sub>2</sub>KN<sub>2</sub>O<sub>2</sub> [M+K]<sup>+</sup>: 493.2594; found: 493.2598.

2-(2-(4-propylphenyl)-1-(4,4,5,5-tetramethyl-1,3,2-dioxaborolan-2-yl)ethyl)-2,3-dihydro-1H-naphtho[1,8-de][1,3,2]diazaborinine (40)

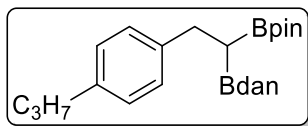

40

The reaction was performed following the general procedure A. The residue was purified by flash column chromatograph to give the product as a crystalline solid (45.8 mg, 52%). <sup>1</sup>H NMR (500 MHz, CDCl<sub>3</sub>) δ 7.19 (d, *J* = 7.8 Hz, 2H), 7.10 (t, *J* = 7.8 Hz, 4H), 7.01 (dd, *J* = 8.3, 1.0 Hz, 2H), 6.28 (dd, *J* = 7.3, 1.0 Hz, 2H), 5.84 (s, 2H), 2.96 (dd, *J* = 14.2, 9.4 Hz, 1H), 2.88 (dd, *J* = 14.1, 6.9 Hz, 1H), 2.58 – 2.55 (m, 2H), 1.66 – 1.61 (m, 2H), 1.24 – 1.22 (m, 1H), 1.20 (d, *J* = 7.8 Hz, 12H), 0.94 (t, *J* = 7.3 Hz, 3H). <sup>13</sup>C NMR (126 MHz, CDCl<sub>3</sub>)

$\delta$  141.3, 140.9, 140.0, 136.3, 128.4, 128.1, 127.6, 119.6, 117.3, 105.5, 83.4, 37.7, 31.6, 24.9, 24.7, 24.5, 13.8.  $^{11}\text{B}$  NMR (160 MHz,  $\text{CDCl}_3$ )  $\delta$  33.68, 32.10. HRMS (ESI,  $m/z$ ) calcd for  $\text{C}_{27}\text{H}_{35}\text{B}_2\text{N}_2\text{O}_2$   $[\text{M}+\text{H}]^+$ : 441.2879; found: 441.2878.

**2-(2-([1,1'-biphenyl]-4-yl)-1-(4,4,5,5-tetramethyl-1,3,2-dioxaborolan-2-yl)ethyl)-2,3-dihydro-1H-naphtho[1,8-de][1,3,2]diazaborinine (41)**

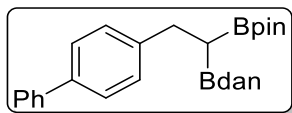

41

The reaction was performed following the general procedure A. The residue was purified by flash column chromatograph to give the product as a crystalline solid (45.6 mg, 48%).  $^1\text{H}$  NMR (500 MHz,  $\text{CDCl}_3$ )  $\delta$  7.58 (dd,  $J = 7.0, 1.6$  Hz, 2H), 7.51 (d,  $J = 8.2$  Hz, 2H), 7.44 – 7.41 (m, 3H), 7.35 (s, 1H), 7.33 (d,  $J = 3.7$  Hz, 1H), 7.09 (dd,  $J = 8.3, 7.3$  Hz, 2H), 7.00 (d,  $J = 8.3$  Hz, 2H), 6.29 (dd,  $J = 7.3, 1.1$  Hz, 2H), 5.84 (s, 2H), 3.03 – 2.98 (m, 1H), 2.96 – 2.91 (m, 1H), 1.22 (s, 1H), 1.20 (s, 6H), 1.18 (s, 6H).  $^{13}\text{C}$  NMR (126 MHz,  $\text{CDCl}_3$ )  $\delta$  142.9, 141.2, 138.7, 136.3, 128.7, 128.6, 127.6, 127.0, 127.0, 117.4, 105.6, 83.4, 31.7, 29.7, 25.0, 24.5.  $^{11}\text{B}$  NMR (160 MHz,  $\text{CDCl}_3$ )  $\delta$  34.09, 33.51. HRMS (ESI,  $m/z$ ) calcd for  $\text{C}_{30}\text{H}_{33}\text{B}_2\text{N}_2\text{O}_2$   $[\text{M}+\text{H}]^+$ : 475.2723; found: 475.2723.

**2-(2-(4-methoxyphenyl)-1-(4,4,5,5-tetramethyl-1,3,2-dioxaborolan-2-yl)ethyl)-2,3-dihydro-1H-naphtho[1,8-de][1,3,2]diazaborinine (42)**

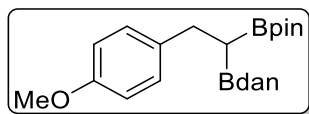

42

The reaction was performed following the general procedure A. The residue was purified by flash column chromatograph to give the product as a crystalline solid (40.3 mg, 47%).  $^1\text{H}$  NMR (500 MHz,  $\text{CDCl}_3$ )  $\delta$  7.19 (d,  $J = 8.6$  Hz, 2H), 7.11 – 7.08 (m, 2H), 7.00 (d,  $J = 8.2$  Hz, 2H), 6.83 – 6.80 (m, 2H), 6.28 (d,  $J = 7.3$  Hz, 2H), 5.83 (s, 2H), 3.78 (s, 3H), 2.92 (dd,  $J = 14.1, 9.5$  Hz, 1H), 2.85 (s, 1H), 1.31 – 1.26 (m, 1H), 1.20 (s,  $J = 1.3$  Hz, 6H), 1.19 (s, 3H), 1.18 (s, 3H).  $^{13}\text{C}$  NMR (126 MHz,  $\text{CDCl}_3$ )  $\delta$  157.7, 141.2, 136.3, 135.9, 129.1, 127.6, 117.3, 113.7, 105.5, 83.4, 55.3, 31.1, 25.0, 24.8, 24.55 (s), 24.5.  $^{11}\text{B}$  NMR (160 MHz,  $\text{CDCl}_3$ )  $\delta$  34.97, 34.45. HRMS (ESI,  $m/z$ ) calcd for  $\text{C}_{25}\text{H}_{31}\text{B}_2\text{N}_2\text{O}_3$   $[\text{M}+\text{H}]^+$ : 429.2515; found: 429.2508.

**2-(2-(3-methoxyphenyl)-1-(4,4,5,5-tetramethyl-1,3,2-dioxaborolan-2-yl)ethyl)-2,3-dihydro-1H-naphtho[1,8-de][1,3,2]diazaborinine (43)**

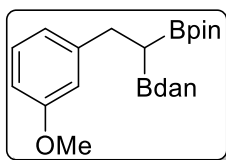

43

The reaction was performed following the general procedure A. The residue was purified by flash column chromatograph to give the product as a crystalline solid (36.8 mg, 43%). <sup>1</sup>H NMR (500 MHz, CDCl<sub>3</sub>) δ 7.17 (t, *J* = 7.9 Hz, 1H), 7.07 (d, *J* = 7.4 Hz, 2H), 7.00 – 6.96 (m, 2H), 6.85 (d, *J* = 7.5 Hz, 1H), 6.81 – 6.78 (m, 1H), 6.70 (dd, *J* = 8.1, 2.3 Hz, 1H), 6.26 (dd, *J* = 7.3, 0.8 Hz, 2H), 5.81 (s, 2H), 3.77 (s, 3H), 2.93 (dd, *J* = 14.1, 9.5 Hz, 1H), 2.86 (d, *J* = 8.0 Hz, 1H), 1.27 – 1.25 (m, 1H), 1.18 (s, 6H), 1.17 (d, *J* = 1.7 Hz, 6H). <sup>13</sup>C NMR (126 MHz, CDCl<sub>3</sub>) δ 159.6, 146.1, 145.4, 141.2, 136.3, 129.2, 128.9, 127.5, 120.8, 120.6, 119.5, 117.3, 116.8, 113.9, 113.8, 111.3, 111.2, 105.5, 83.4 55.1, 32.0, 31.4, 25.0, 24.8, 24.6, 24.5. <sup>11</sup>B NMR (160 MHz, CDCl<sub>3</sub>) δ 33.92, 33.68. HRMS (ESI, *m/z*) calcd for C<sub>25</sub>H<sub>31</sub>B<sub>2</sub>N<sub>2</sub>O<sub>3</sub> [M+H]<sup>+</sup>: 429.2515; found: 429.2512.

**2-(2-(4-(pentyloxy)phenyl)-1-(4,4,5,5-tetramethyl-1,3,2-dioxaborolan-2-yl)ethyl)-2,3-dihydro-1H-naphtho[1,8-de][1,3,2]diazaborinine (44)**

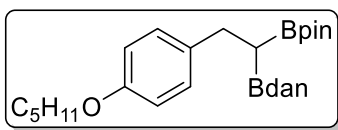

44

The reaction was performed following the general procedure A. The residue was purified by flash column chromatograph to give the product as a crystalline solid (56.2 mg, 58%). <sup>1</sup>H NMR (500 MHz, CDCl<sub>3</sub>) δ 7.16 (d, *J* = 8.5 Hz, 2H), 7.11 – 7.06 (m, 2H), 6.99 (d, *J* = 8.2 Hz, 2H), 6.80 (d, *J* = 8.6 Hz, 2H), 6.27 (d, *J* = 7.3 Hz, 2H), 5.81 (s, 2H), 3.92 (t, *J* = 6.6 Hz, 2H), 2.90 (dd, *J* = 14.1, 9.4 Hz, 1H), 2.85 – 2.81 (m, 1H), 1.81 – 1.72 (m, 3H), 1.43 – 1.37 (m, 4H), 1.19 (s, 6H), 1.18 (s, 6H), 1.14 (dd, *J* = 6.8, 2.4 Hz, 1H), 0.93 (d, *J* = 5.1 Hz, 3H). <sup>13</sup>C NMR (126 MHz, CDCl<sub>3</sub>) δ 157.3, 141.2, 136.3, 135.7, 129.2, 129.0, 127.5, 119.5, 117.3, 114.4, 114.1, 105.5, 83.3, 68.1, 31.1, 29.1, 28.2, 25.0, 24.8 24.54, 24.52, 22.5, 14.0. <sup>11</sup>B NMR (160 MHz, CDCl<sub>3</sub>) δ 34.27, 34.09. HRMS (ESI, *m/z*) calcd for C<sub>29</sub>H<sub>39</sub>B<sub>2</sub>N<sub>2</sub>O<sub>3</sub> [M+H]<sup>+</sup>: 485.3141; found: 485.3147.

**4-(2-(1H-naphtho[1,8-de][1,3,2]diazaborinin-2(3H)-yl)-2-(4,4,5,5-tetramethyl-1,3,2-dioxaborolan-2-yl)ethyl)-N,N-dimethylaniline (45)**

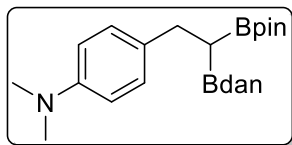

45

The reaction was performed following the general procedure A. The residue was purified by flash column chromatograph to give the product as a crystalline solid (30.9 mg, 35%). <sup>1</sup>H NMR (500 MHz, CDCl<sub>3</sub>) δ 7.15 (d, *J* = 8.6 Hz, 2H), 7.11 – 7.07 (m, 2H), 7.00 (d, *J* = 8.2 Hz, 2H), 6.70 (d, *J* = 8.6 Hz, 2H), 6.27 (d, *J* = 7.3 Hz, 2H), 5.84 (s, 2H), 2.91 (s, 6H), 2.89 – 2.79 (m, 2H), 1.21 (d, *J* = 6.4 Hz, 12H), 1.18 – 1.14 (m, 1H). <sup>13</sup>C NMR (126 MHz, CDCl<sub>3</sub>) δ 149.1, 141.3, 136.3, 128.7, 127.5, 119.5, 117.2, 113.1, 105.5, 83.3, 41.0, 30.9, 25.0, 24.6. <sup>11</sup>B NMR (160 MHz, CDCl<sub>3</sub>) δ 33.92, 32.45. HRMS (ESI, *m/z*) calcd for C<sub>26</sub>H<sub>34</sub>B<sub>2</sub>N<sub>3</sub>O<sub>2</sub> [M+H]<sup>+</sup>: 442.2832; found: 442.2828.

**Methyl 4-(2-(1H-naphtho[1,8-de][1,3,2]diazaborinin-2(3H)-yl)-2-(4,4,5,5-tetramethyl-1,3,2-**



dioxaborolan-2-yl)ethyl)benzoate (46)

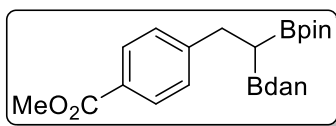

46

The reaction was performed following the general procedure A. The residue was purified by flash column chromatograph to give the product as a crystalline solid (43.8 mg, 48%).  $^1\text{H NMR}$  (500 MHz,  $\text{CDCl}_3$ )  $\delta$  7.97 (s, 1H), 7.93 (d,  $J = 8.3$  Hz, 1H), 7.32 (s, 1H), 7.29 (s, 1H), 7.09 (dd,  $J = 8.3, 7.3$  Hz, 2H), 7.01 (dd,  $J = 8.3, 1.0$  Hz, 2H), 6.27 (dd,  $J = 7.3, 1.0$  Hz, 2H), 5.58 (s, 2H), 3.91 (s, 3H), 2.85 (d,  $J = 8.2$  Hz, 1H), 2.80 (s, 1H), 1.40 – 1.37 (m, 1H), 1.21 (s, 12H).  $^{13}\text{C NMR}$  (126 MHz,  $\text{CDCl}_3$ )  $\delta$  167.3, 149.4, 140.9, 136.3, 129.9, 129.6, 128.1, 128.0, 127.6, 117.6, 105.6, 83.2, 52.0, 31.0, 30.0, 24.8.  $^{11}\text{B NMR}$  (160 MHz,  $\text{CDCl}_3$ )  $\delta$  34.80, 34.27. HRMS (ESI,  $m/z$ ) calcd for  $\text{C}_{26}\text{H}_{31}\text{B}_2\text{N}_2\text{O}_4$   $[\text{M}+\text{H}]^+$ : 457.2464; found: 457.2461.

2-(1-(4,4,5,5-tetramethyl-1,3,2-dioxaborolan-2-yl)-2-(4-(trifluoromethoxy)phenyl)ethyl)-2,3-dihydro-1H-naphtho[1,8-de][1,3,2]diazaborinine (47)

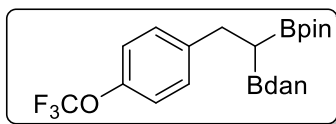

47

The reaction was performed following the general procedure B. The residue was purified by flash column chromatograph to give the product as a crystalline solid (46.3 mg, 48%).  $^1\text{H NMR}$  (500 MHz,  $\text{CDCl}_3$ )  $\delta$  7.29 (d,  $J = 2.7$  Hz, 1H), 7.27 (d,  $J = 3.1$  Hz, 1H), 7.13 – 7.11 (m, 2H), 7.10 – 7.08 (m, 2H), 7.01 (dd,  $J = 8.3, 2.8$  Hz, 2H), 6.30 (d,  $J = 7.4$  Hz, 2H), 5.80 (s, 2H), 2.93 – 2.87 (m, 2H), 1.27 (s, 1H), 1.17 (s, 12H).  $^{13}\text{C NMR}$  (126 MHz,  $\text{CDCl}_3$ )  $\delta$  147.3, 142.6, 141.1, 136.3, 129.5, 127.6, 120.8, 120.4 (q,  $J = 119.7$ ), 119.5, 117.5, 105.6, 83.5, 31.4, 24.9, 24.4.  $^{11}\text{B NMR}$  (160 MHz,  $\text{CDCl}_3$ )  $\delta$  33.92, 33.15.  $^{19}\text{F NMR}$  (471 MHz,  $\text{CDCl}_3$ )  $\delta$  -57.96. HRMS (ESI,  $m/z$ ) calcd for  $\text{C}_{25}\text{H}_{28}\text{B}_2\text{F}_3\text{N}_2\text{O}_3$   $[\text{M}+\text{H}]^+$ : 483.2233; found: 483.2229.

2-(2-(4-fluorophenyl)-1-(4,4,5,5-tetramethyl-1,3,2-dioxaborolan-2-yl)ethyl)-2,3-dihydro-1H-naphtho[1,8-de][1,3,2]diazaborinine (48)

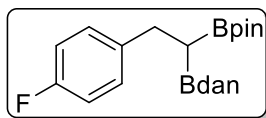

48

The reaction was performed following the general procedure B. The residue was purified by flash column chromatograph to give the product as a crystalline solid (37.5 mg, 45%).  $^1\text{H NMR}$  (500 MHz,  $\text{CDCl}_3$ )  $\delta$  7.22 (dd,  $J = 8.4, 5.5$  Hz, 2H), 7.10 (t,  $J = 7.8$  Hz, 2H), 7.01 (d,  $J = 8.2$  Hz, 2H), 6.95 (t,  $J = 8.7$  Hz, 2H), 6.29 (d,

$J = 7.3$  Hz, 2H), 5.81 (s, 2H), 2.94 – 2.84 (m, 2H), 1.33 – 1.21 (m, 1H), 1.17 (d,  $J = 12.5$  Hz, 12H).  $^{13}\text{C}$  NMR (126 MHz,  $\text{CDCl}_3$ )  $\delta$  161.2 (d,  $J = 243.4$  Hz), 141.1, 139.4 (d,  $J = 3.1$  Hz), 136.3, 129.6 (d,  $J = 7.9$  Hz), 127.6, 119.5, 117.4, 114.9 (d,  $J = 21.3$  Hz), 105.6, 83.4, 31.2, 25.0, 24.5.  $^{11}\text{B}$  NMR (160 MHz,  $\text{CDCl}_3$ )  $\delta$  34.54, 34.34.  $^{19}\text{F}$  NMR (471 MHz,  $\text{CDCl}_3$ )  $\delta$  -117.92. HRMS (ESI,  $m/z$ ) calcd for  $\text{C}_{24}\text{H}_{28}\text{B}_2\text{FN}_2\text{O}_2$   $[\text{M}+\text{H}]^+$ : 417.2315; found: 417.2307.

**2-(2-(4-chlorophenyl)-1-(4,4,5,5-tetramethyl-1,3,2-dioxaborolan-2-yl)ethyl)-2,3-dihydro-1H-naphtho[1,8-de][1,3,2]diazaborinine (49)**

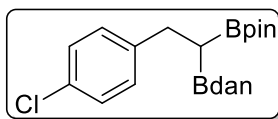

49

The reaction was performed following the general procedure B. The residue was purified by flash column chromatograph to give the product as a crystalline solid (40.6 mg, 47%).  $^1\text{H}$  NMR (500 MHz,  $\text{CDCl}_3$ )  $\delta$  7.23 (d,  $J = 8.3$  Hz, 2H), 7.19 (d,  $J = 8.4$  Hz, 2H), 7.09 (t,  $J = 7.8$  Hz, 2H), 7.00 (d,  $J = 8.2$  Hz, 2H), 6.28 (d,  $J = 7.3$  Hz, 2H), 5.80 (s, 2H), 2.91 (dd,  $J = 14.1, 9.8$  Hz, 1H), 2.85 (t,  $J = 3.9$  Hz, 1H), 1.27 (d,  $J = 6.0$  Hz, 1H), 1.19 (s, 6H), 1.17 (s, 3H), 1.16 (s, 3H).  $^{13}\text{C}$  NMR (126 MHz,  $\text{CDCl}_3$ )  $\delta$  142.2, 141.1, 136.3, 131.4, 129.7, 129.6, 128.3, 128.0, 127.6, 119.5, 117.5, 105.6, 83.5, 31.4, 30.7, 25.0, 24.8, 24.7, 24.5, 24.5.  $^{11}\text{B}$  NMR (160 MHz,  $\text{CDCl}_3$ )  $\delta$  34.25, 33.50. HRMS (ESI,  $m/z$ ) calcd for  $\text{C}_{24}\text{H}_{28}\text{B}_2\text{ClN}_2\text{O}_2$   $[\text{M}+\text{H}]^+$ : 433.2020; found: 433.2017.

**2-(1-(4,4,5,5-tetramethyl-1,3,2-dioxaborolan-2-yl)-2-(4-(trifluoromethyl)phenyl)ethyl)-2,3-dihydro-1H-naphtho[1,8-de][1,3,2]diazaborinine (50)**

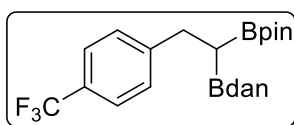

50

The reaction was performed following the general procedure B. The residue was purified by flash column chromatograph to give the product as a crystalline solid (48.5 mg, 52%).  $^1\text{H}$  NMR (500 MHz,  $\text{CDCl}_3$ )  $\delta$  7.51 (s, 2H), 7.37 (d,  $J = 9.1$  Hz, 2H), 7.09 (d,  $J = 8.4$  Hz, 2H), 7.01 (d,  $J = 9.1$  Hz, 2H), 6.30 (d,  $J = 8.2$  Hz, 2H), 5.81 (s, 2H), 2.95 (dd,  $J = 16.9, 9.6$  Hz, 2H), 1.18 (s, 6H), 1.15 (s, 6H), 0.88 (s, 1H).  $^{13}\text{C}$  NMR (126 MHz,  $\text{CDCl}_3$ )  $\delta$  147.9, 141.0, 136.3, 128.5, 128.0, 127.6, 125.2 (q,  $J = 3.7$  Hz, 1H), 119.5, 117.6, 105.6, 83.5, 31.9, 24.9, 24.44.  $^{11}\text{B}$  NMR (160 MHz,  $\text{CDCl}_3$ )  $\delta$  34.80, 34.27.  $^{19}\text{F}$  NMR (471 MHz,  $\text{CDCl}_3$ )  $\delta$  -62.27. HRMS (ESI,  $m/z$ ) calcd for  $\text{C}_{25}\text{H}_{27}\text{B}_2\text{F}_3\text{N}_2\text{NaO}_2$   $[\text{M}+\text{H}]^+$ : 489.2103; found: 489.2108.

**2-(1-(4,4,5,5-tetramethyl-1,3,2-dioxaborolan-2-yl)-2-(m-tolyl)ethyl)-2,3-dihydro-1H-naphtho[1,8-de][1,3,2]diazaborinine (51)**

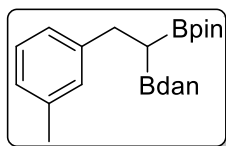

51

The reaction was performed following the general procedure A. The residue was purified by flash column chromatograph to give the product as a crystalline solid (43.0 mg, 40%).  $^1\text{H NMR}$  (500 MHz,  $\text{CDCl}_3$ )  $\delta$  7.14 (d,  $J = 7.5$  Hz, 1H), 7.08 (t,  $J = 7.8$  Hz, 5H), 6.99 (d,  $J = 8.2$  Hz, 3H), 6.27 (d,  $J = 7.3$  Hz, 2H), 5.81 (s, 2H), 2.92 (dd,  $J = 14.0, 9.7$  Hz, 1H), 2.84 (dd,  $J = 14.1, 6.5$  Hz, 1H), 2.31 (s, 3H), 1.21 (s, 1H), 1.19 (s, 6H), 1.17 (s, 6H).  $^{13}\text{C NMR}$  (126 MHz,  $\text{CDCl}_3$ )  $\delta$  143.7 (s), 141.2 (s), 137.7 (s), 129.0 (s), 128.2 (s), 127.5 (s), 126.4 (s), 125.2 (s), 117.3 (s), 105.5 (s), 83.3 (s), 31.9 (s), 25.0 (s), 24.5 (s), 21.4 (s).  $^{11}\text{B NMR}$  (160 MHz,  $\text{CDCl}_3$ )  $\delta$  34.32, 34.09. **HRMS** (ESI,  $m/z$ ) calcd for  $\text{C}_{25}\text{H}_{30}\text{B}_2\text{N}_2\text{NaO}_2$   $[\text{M}+\text{Na}]^+$ : 435.2386; found: 435.2391.

**2-(2-(3,4-dimethylphenyl)-1-(4,4,5,5-tetramethyl-1,3,2-dioxaborolan-2-yl)ethyl)-2,3-dihydro-1H-naphtho[1,8-de][1,3,2]diazaborinine (52)**

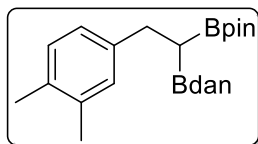

52

The reaction was performed following the general procedure A. The residue was purified by flash column chromatograph to give the product as a crystalline solid (34.1 mg, 40%).  $^1\text{H NMR}$  (500 MHz,  $\text{CDCl}_3$ )  $\delta$  7.09 (td,  $J = 7.9, 7.5, 2.0$  Hz, 2H), 7.05 – 6.98 (m, 5H), 6.27 (d,  $J = 7.4$  Hz, 2H), 5.83 (s, 2H), 2.92 (ddd,  $J = 14.0, 9.3, 2.5$  Hz, 1H), 2.82 (ddd,  $J = 14.1, 6.8, 2.5$  Hz, 1H), 2.23 (dd,  $J = 4.6, 2.1$  Hz, 6H), 1.20 (dd,  $J = 6.4, 2.0$  Hz, 12H), 1.16 – 1.13 (m, 1H).  $^{13}\text{C NMR}$  (126 MHz,  $\text{CDCl}_3$ )  $\delta$  141.3, 141.2, 136.3, 136.2, 133.7, 129.5, 127.5, 125.5, 119.5, 105.5, 83.3, 31.5, 29.7, 25.0, 24.5, 19.8, 19.3.  $^{11}\text{B NMR}$  (160 MHz,  $\text{CDCl}_3$ )  $\delta$  32.27, 31.57. **HRMS** (ESI,  $m/z$ ) calcd for  $\text{C}_{26}\text{H}_{32}\text{B}_2\text{KN}_2\text{O}_2$   $[\text{M}+\text{K}]^+$ : 465.2281; found: 465.2288.

**2-(2-(3,5-dimethylphenyl)-1-(4,4,5,5-tetramethyl-1,3,2-dioxaborolan-2-yl)ethyl)-2,3-dihydro-1H-naphtho[1,8-de][1,3,2]diazaborinine (53)**

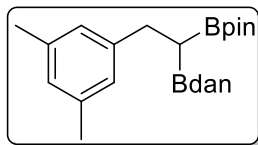

53

The reaction was performed following the general procedure A. The residue was purified by flash column chromatograph to give the product as a crystalline solid (49.4 mg, 58%).  $^1\text{H NMR}$  (500 MHz,  $\text{CDCl}_3$ )  $\delta$  7.09 (dd,  $J = 8.3, 7.3$  Hz, 2H), 6.99 (dd,  $J = 8.2, 1.0$  Hz, 2H), 6.89 (d,  $J = 1.5$  Hz, 2H), 6.80 (s, 1H), 6.27 (dd,  $J = 7.2, 1.0$  Hz, 2H), 5.82 (s, 2H), 2.90 (dd,  $J = 13.9, 9.9$  Hz, 1H), 2.80 (dd,  $J = 13.9, 6.2$  Hz, 1H), 2.28 (s, 6H), 1.19 (d,  $J = 6.1$  Hz, 12H), 1.14 (d,  $J = 3.7$  Hz, 1H).  $^{13}\text{C NMR}$  (126 MHz,  $\text{CDCl}_3$ )  $\delta$  143.7, 141.3, 137.6, 136.3,

127.6, 127.3, 126.1, 119.5, 117.3, 105.5, 83.3, 31.8, 29.7, 25.0, 24.5, 21.3. **<sup>11</sup>B NMR** (160 MHz, CDCl<sub>3</sub>) δ 34.09, 32.63. **HRMS** (ESI, m/z) calcd for C<sub>26</sub>H<sub>33</sub>B<sub>2</sub>N<sub>2</sub>O<sub>2</sub> [M+H]<sup>+</sup>: 427.2723; found: 427.2725.

**2-(2-(4,4-dimethylthiochroman-7-yl)-1-(4,4,5,5-tetramethyl-1,3,2-dioxaborolan-2-yl)ethyl)-2,3-dihydro-1H-naphtho[1,8-de][1,3,2]diazaborinine (54)**

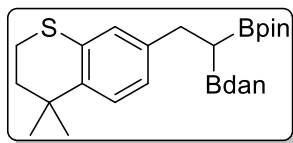

**54**

**The reaction was performed following the general procedure A.** The residue was purified by flash column chromatograph to give the product as a crystalline solid (56.8 mg, 57%). **<sup>1</sup>H NMR** (500 MHz, CDCl<sub>3</sub>) δ 7.25 (d, *J* = 1.6 Hz, 1H), 7.08 (dd, *J* = 8.2, 7.4 Hz, 2H), 7.01 – 6.97 (m, 3H), 6.94 (dd, *J* = 8.0, 1.8 Hz, 1H), 6.26 (dd, *J* = 7.3, 0.8 Hz, 2H), 5.81 (s, 2H), 3.01 – 2.98 (m, 2H), 2.91 – 2.79 (m, 2H), 1.94 – 1.91 (m, 2H), 1.29 (s, 3H), 1.27 (s, 3H), 1.19 (s, 6H), 1.17 (s, 6H), 1.15 – 1.12 (m, 1H). **<sup>13</sup>C NMR** (126 MHz, CDCl<sub>3</sub>) δ 141.8, 141.2, 139.5, 136.3, 128.4, 127.5, 126.5, 126.4, 126.0, 119.5, 117.3, 105.5, 83.34, 37.7, 33.0, 31.7, 30.31, 30.26, 25.0, 24.6, 23.1. **<sup>11</sup>B NMR** (160 MHz, CDCl<sub>3</sub>) δ 33.15, 32.27. **HRMS** (ESI, m/z) calcd for C<sub>29</sub>H<sub>37</sub>B<sub>2</sub>N<sub>2</sub>O<sub>2</sub>S [M+H]<sup>+</sup>: 499.2756; found: 499.2754.

**2-(1-(4,4,5,5-tetramethyl-1,3,2-dioxaborolan-2-yl)-2-(thiophen-3-yl)ethyl)-2,3-dihydro-1H-naphtho[1,8-de][1,3,2]diazaborinine (55)**

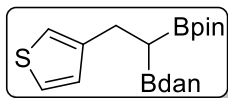

**55**

**The reaction was performed following the general procedure A.** The residue was purified by flash column chromatograph to give the product as a crystalline solid (46.9 mg, 58%). **<sup>1</sup>H NMR** (500 MHz, CDCl<sub>3</sub>) δ 7.56 (d, *J* = 3.0 Hz, 1H), 7.50 (s, 1H), 7.41 (dd, *J* = 5.1, 1.3 Hz, 1H), 7.10 (d, *J* = 7.8 Hz, 2H), 7.00 (d, *J* = 8.3 Hz, 2H), 6.34 (d, *J* = 7.3 Hz, 2H), 6.21 (s, 2H), 1.38 (s, 12H), 1.26 (d, *J* = 6.5 Hz, 2H), 1.20 (s, 1H). **<sup>13</sup>C NMR** (126 MHz, CDCl<sub>3</sub>) δ 144.6, 141.5, 136.4, 127.9, 127.6, 126.1, 125.4, 117.3, 105.7, 83.9, 53.4, 25.0, 24.8. **<sup>11</sup>B NMR** (160 MHz, CDCl<sub>3</sub>) δ 32.08, 31.80. **HRMS** (ESI, m/z) calcd for C<sub>22</sub>H<sub>27</sub>B<sub>2</sub>N<sub>2</sub>O<sub>2</sub>S [M+H]<sup>+</sup>: 405.1974; found: 405.1974.

**2-(2-(1H-phenalen-5-yl)-1-(4,4,5,5-tetramethyl-1,3,2-dioxaborolan-2-yl)ethyl)-2,3-dihydro-1H-naphtho[1,8-de][1,3,2]diazaborinine (56)**

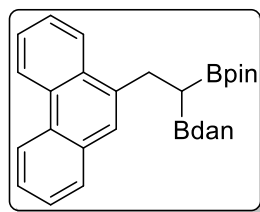

56

The reaction was performed following the general procedure A. The residue was purified by flash column chromatograph to give the product as a crystalline solid (50.6 mg, 52%).  $^1\text{H NMR}$  (500 MHz,  $\text{CDCl}_3$ )  $\delta$  8.77 – 8.75 (m, 1H), 8.66 (s, 1H), 8.17 (dt,  $J = 7.8, 3.0$  Hz, 1H), 7.84 – 7.82 (m, 1H), 7.74 (s, 1H), 7.67 (s, 1H), 7.65 – 7.63 (m, 1H), 7.60 – 7.57 (m, 2H), 7.13 (t,  $J = 7.8$  Hz, 2H), 7.05 (d,  $J = 8.2$  Hz, 2H), 6.34 (d,  $J = 7.3$  Hz, 2H), 5.97 (s, 2H), 3.45 (s, 2H), 1.23 (s, 3H), 1.23 (s, 3H), 1.19 (s, 3H), 1.18 (s, 3H), 0.92 (s, 1H).  $^{13}\text{C NMR}$  (126 MHz,  $\text{CDCl}_3$ )  $\delta$  141.2, 137.6, 136.4, 131.9, 131.3, 129.7, 128.1, 128.0, 127.6, 126.62, 126.60, 126.4, 126.2, 126.0, 125.7, 125.5, 125.3, 124.7, 124.4, 123.3, 123.0, 122.5, 122.4, 119.6, 117.5, 105.7, 83.5, 83.2, 31.6, 29.2, 28.6, 25.1, 24.9, 24.6, 24.5, 22.7, 14.2.  $^{11}\text{B NMR}$  (160 MHz,  $\text{CDCl}_3$ )  $\delta$  34.62, 34.09. **HRMS** (ESI,  $m/z$ ) calcd for  $\text{C}_{32}\text{H}_{32}\text{B}_2\text{N}_2\text{NaO}_2$  [ $\text{M}+\text{Na}$ ] $^+$ : 521.2542; found: 521.2539.

2-(2-(4-(9H-carbazol-9-yl)phenyl)-1-(4,4,5,5-tetramethyl-1,3,2-dioxaborolan-2-yl)ethyl)-2,3-dihydro-1H-naphtho[1,8-de][1,3,2]diazaborinine (57)

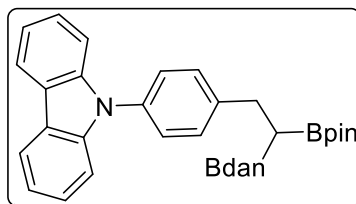

57

The reaction was performed following the general procedure A. The residue was purified by flash column chromatograph to give the product as a crystalline solid (53.0 mg, 47%).  $^1\text{H NMR}$  (500 MHz,  $\text{CDCl}_3$ )  $\delta$  8.16 (d,  $J = 7.8$  Hz, 2H), 7.51 (d,  $J = 8.4$  Hz, 2H), 7.48 – 7.46 (m, 2H), 7.43 – 7.40 (m, 2H), 7.40 – 7.37 (m, 2H), 7.30 – 7.28 (m, 2H), 7.15 – 7.11 (m, 2H), 7.04 (dd,  $J = 8.3, 1.0$  Hz, 2H), 6.34 (dd,  $J = 7.3, 1.0$  Hz, 2H), 5.88 (s, 2H), 3.11 – 3.02 (m, 2H), 1.24 (s, 6H), 1.22 (s, 6H), 0.89 – 0.88 (m, 1H).  $^{13}\text{C NMR}$  (126 MHz,  $\text{CDCl}_3$ )  $\delta$  143.3, 141.2, 141.1, 136.3, 135.3, 129.7, 127.6, 127.0, 125.9, 123.3, 120.3, 119.8, 117.5, 109.8, 105.7, 83.5, 31.8, 25.0, 24.6.  $^{11}\text{B NMR}$  (160 MHz,  $\text{CDCl}_3$ )  $\delta$  34.27, 33.51. **HRMS** (ESI,  $m/z$ ) calcd for  $\text{C}_{36}\text{H}_{36}\text{B}_2\text{N}_3\text{O}_2$  [ $\text{M}+\text{H}$ ] $^+$ : 564.2988; found: 564.2986.

2-(2-(naphthalen-2-yl)-1-(4,4,5,5-tetramethyl-1,3,2-dioxaborolan-2-yl)ethyl)-2,3-dihydro-1H-naphtho[1,8-de][1,3,2]diazaborinine (58)

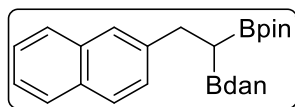

58

The reaction was performed following the general procedure A. The residue was purified by flash column chromatograph to give the product as a crystalline solid (42.6 mg, 52%).  $^1\text{H NMR}$  (500 MHz,  $\text{CDCl}_3$ )  $\delta$  7.81 (d,  $J = 7.6$  Hz, 1H), 7.79 – 7.77 (m, 2H), 7.72 (s, 1H), 7.46 – 7.42 (m, 3H), 7.11 (t,  $J = 7.7$  Hz, 2H), 7.03 (s, 2H), 6.30 (d,  $J = 7.3$  Hz, 2H), 5.88 (s, 2H), 3.16 (dd,  $J = 14.2, 9.9$  Hz, 1H), 3.07 (dd,  $J = 14.2, 6.2$  Hz, 1H), 1.31 (d,  $J = 6.3$  Hz, 1H), 1.18 (d,  $J = 9.7$  Hz, 12H).  $^{13}\text{C NMR}$  (126 MHz,  $\text{CDCl}_3$ )  $\delta$  141.4, 141.2, 133.6, 127.9, 127.6, 127.5, 127.3, 126.0, 125.8, 125.1, 117.4, 117.3, 105.6, 83.4, 32.2, 29.7, 25.00, 24.8, 24.73, 24.71, 24.6, 24.5.  $^{11}\text{B NMR}$  (160 MHz,  $\text{CDCl}_3$ )  $\delta$  33.15, 32.27. **HRMS** (ESI,  $m/z$ ) calcd for  $\text{C}_{28}\text{H}_{31}\text{B}_2\text{N}_2\text{O}_2$   $[\text{M}+\text{H}]^+$ : 449.2566; found: 449.2560.

**(R)-2-(4-phenyl-1-(4,4,5,5-tetramethyl-1,3,2-dioxaborolan-2-yl)butyl)-2,3-dihydro-1H-naphtho[1,8-de][1,3,2]diazaborinine (59)**

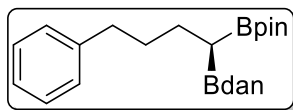

59

The reaction was performed following the general procedure C. The residue was purified by flash column chromatograph to give the product as a crystalline solid (66.5 mg, 78%).  $^1\text{H NMR}$  (500 MHz,  $\text{CDCl}_3$ )  $\delta$  7.31 – 7.27 (m, 2H), 7.21 – 7.18 (m, 3H), 7.11 – 7.07 (m, 2H), 6.99 (d,  $J = 8.3$  Hz, 2H), 6.27 (d,  $J = 7.3$  Hz, 2H), 5.76 (s, 2H), 2.65 (t,  $J = 6.9$  Hz, 2H), 1.71 – 1.66 (m, 2H), 1.62 – 1.56 (m, 2H), 1.25 (d,  $J = 6.0$  Hz, 12H), 0.78 (dd,  $J = 8.2, 6.0$  Hz, 1H).  $^{13}\text{C NMR}$  (126 MHz,  $\text{CDCl}_3$ )  $\delta$  142.6, 141.3, 136.3, 128.4, 128.3, 127.56, 125.7, 119.5, 117.3, 105.5, 83.2, 36.0, 34.0, 26.0, 25.1, 24.5.  $^{11}\text{B NMR}$  (160 MHz,  $\text{CDCl}_3$ )  $\delta$  34.18, 33.79. **HRMS** (ESI,  $m/z$ ) calcd for  $\text{C}_{26}\text{H}_{33}\text{B}_2\text{N}_2\text{O}_3$   $[\text{M}+\text{H}]^+$ : 427.2723; found: 427.2726. **Specific rotation**:  $[\alpha]_{\text{D}}^{25} = -8.78^\circ$  ( $c = 0.82$ ,  $\text{CHCl}_3$ ). **HPLC analysis**: HPLC DAICEL CHIRALCEL AD, hexane/isopropanol = 90/10, 0.5 mL/min,  $\lambda = 280$  nm,  $t_{\text{R}}$  (minor) = 9.8 min,  $t_{\text{R}}$  (major) = 10.4 min, er = 94:6.

**(R)-2-(3-phenyl-1-(4,4,5,5-tetramethyl-1,3,2-dioxaborolan-2-yl)propyl)-2,3-dihydro-1H-naphtho[1,8-de][1,3,2]diazaborinine (60)**

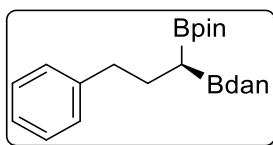

60

The reaction was performed following the general procedure C. The residue was purified by flash column chromatograph to give the product as a crystalline solid (62.6 mg, 76%).  $^1\text{H NMR}$  (500 MHz,  $\text{CDCl}_3$ )  $\delta$  7.32 – 7.27 (m, 2H), 7.21 (dd,  $J = 13.2, 7.0$  Hz, 3H), 7.10 (t,  $J = 7.8$  Hz, 2H), 7.00 (d,  $J = 8.2$  Hz, 2H), 6.29 (d,  $J = 7.3$  Hz, 2H), 5.80 (s, 2H), 2.78 – 2.70 (m, 1H), 2.64 – 2.60 (m, 1H), 2.03 – 1.94 (m, 1H), 1.88 – 1.83 (m, 1H), 1.28 (s, 6H), 1.27 (s, 6H), 0.84 (dd,  $J = 9.8, 5.6$  Hz, 1H).  $^{13}\text{C NMR}$  (126 MHz,  $\text{CDCl}_3$ )  $\delta$  142.6, 141.3, 136.3, 128.5, 128.33 (s), 127.6, 125.8, 119.5, 117.3, 105.5, 83.3, 38.5, 28.6, 25.1, 24.5.  $^{11}\text{B NMR}$  (160 MHz,  $\text{CDCl}_3$ )  $\delta$  34.23, 34.02. **HRMS** (ESI,  $m/z$ ) calcd for  $\text{C}_{25}\text{H}_{31}\text{B}_2\text{N}_2\text{O}_2$   $[\text{M}+\text{H}]^+$ : 413.2566; found: 413.2561. **Specific rotation**:  $[\alpha]_{\text{D}}^{25} = -4.08^\circ$  ( $c = 0.76$ ,  $\text{CHCl}_3$ ). **HPLC analysis**: HPLC DAICEL CHIRALCEL OD, hexane/isopropanol = 99/1, 1.0 mL/min,  $\lambda = 280$  nm,  $t_{\text{R}}$  (minor) = 14.5 min,  $t_{\text{R}}$  (major) = 16.4 min, er = 89:11.

**(R)-2-(2-cyclohexyl-1-(4,4,5,5-tetramethyl-1,3,2-dioxaborolan-2-yl)ethyl)-2,3-dihydro-1H-naphtho[1,8-de][1,3,2]diazaborinine (61)**

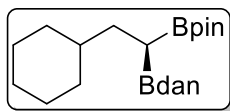

**61**

The reaction was performed following the general procedure C. The residue was purified by flash column chromatograph to give the product as a crystalline solid (56.6 mg, 70%). <sup>1</sup>H NMR (500 MHz, CDCl<sub>3</sub>) δ 7.12 – 7.07 (m, 2H), 7.00 (d, *J* = 8.2 Hz, 2H), 6.29 (d, *J* = 7.2 Hz, 2H), 5.80 (s, 2H), 1.75 – 1.63 (m, 8H), 1.56 (d, *J* = 4.3 Hz, 2H), 1.24 (s, 12H), 1.18 (dd, *J* = 18.8, 6.8 Hz, 3H), 0.89 (d, *J* = 11.3 Hz, 2H), 0.73 – 0.69 (m, 1H). <sup>13</sup>C NMR (126 MHz, CDCl<sub>3</sub>) δ 141.4, 136.3, 127.5, 119.5, 117.2, 105.4, 83.1, 40.3, 37.8, 33.5, 33.4, 33.3, 26.8, 26.4, 25.1, 24.9, 24.5, 24.5, 23.7. <sup>11</sup>B NMR (160 MHz, CDCl<sub>3</sub>) δ 34.26, 34.14. HRMS (ESI, *m/z*) calcd for C<sub>24</sub>H<sub>35</sub>B<sub>2</sub>N<sub>2</sub>O<sub>2</sub> [M+H]<sup>+</sup>: 405.2879; found: 405.2873. **Specific rotation:** [ $\alpha$ ]<sub>D</sub><sup>25</sup> = -6.3° (*c* = 1.02, CHCl<sub>3</sub>). **HPLC analysis:** HPLC DAICEL CHIRALCEL OD, hexane/isopropanol = 99/1, 0.5 mL/min,  $\lambda$  = 280 nm, *t<sub>R</sub>* (major) = 20.4 min, *t<sub>R</sub>* (minor) = 24.8 min, er = 97:3.

**(R)-2-(2-cyclopentyl-1-(4,4,5,5-tetramethyl-1,3,2-dioxaborolan-2-yl)ethyl)-2,3-dihydro-1H-naphtho[1,8-de][1,3,2]diazaborinine (62)**

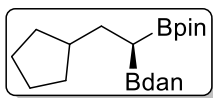

**62**

The reaction was performed following the general procedure C. The residue was purified by flash column chromatograph to give the product as a crystalline solid (52.3 mg, 67%). <sup>1</sup>H NMR (500 MHz, CDCl<sub>3</sub>) δ 7.09 (t, *J* = 7.8 Hz, 2H), 6.99 (d, *J* = 8.2 Hz, 2H), 6.29 (d, *J* = 7.3 Hz, 2H), 5.78 (s, 2H), 1.79 – 1.69 (m, 4H), 1.61 – 1.56 (m, 3H), 1.52 – 1.48 (m, 2H), 1.24 (d, *J* = 5.7 Hz, 12H), 1.09 (dt, *J* = 10.7, 3.3 Hz, 2H), 0.83 (dd, *J* = 9.1, 6.2 Hz, 1H). <sup>13</sup>C NMR (126 MHz, CDCl<sub>3</sub>) δ 141.4, 136.3, 127.5, 119.5, 117.2, 105.4, 83.2, 82.9, 42.4, 32.8, 32.6, 32.52, 32.50, 25.21, 25.18, 25.0, 24.8, 24.60, 24.57. <sup>11</sup>B NMR (160 MHz, CDCl<sub>3</sub>) δ 34.38, 33.90. HRMS (ESI, *m/z*) calcd for C<sub>23</sub>H<sub>32</sub>B<sub>2</sub>N<sub>2</sub>NaO<sub>2</sub> [M+Na]<sup>+</sup>: 413.2542; found: 413.2534. **Specific rotation:** [ $\alpha$ ]<sub>D</sub><sup>25</sup> = -8.44° (*c* = 1.28, CHCl<sub>3</sub>). **HPLC analysis:** HPLC DAICEL CHIRALCEL OD, hexane/isopropanol = 90/10, 1.0 mL/min,  $\lambda$  = 280 nm, *t<sub>R</sub>* (major) = 6.8 min, *t<sub>R</sub>* (minor) = 7.9 min, er = 86:14.

**(R)-2-(2-cyclopropyl-1-(4,4,5,5-tetramethyl-1,3,2-dioxaborolan-2-yl)ethyl)-2,3-dihydro-1H-naphtho[1,8-de][1,3,2]diazaborinine (63)**

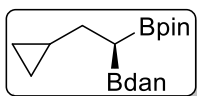

**63**

The reaction was performed following the general procedure C. The residue was purified by flash column chromatograph to give the product as a crystalline solid (48.5 mg, 67%). <sup>1</sup>H NMR (500 MHz, CDCl<sub>3</sub>) δ 7.08

(t,  $J = 7.8$  Hz, 2H), 6.99 (d,  $J = 8.2$  Hz, 2H), 6.28 (d,  $J = 7.3$  Hz, 2H), 5.80 (s, 2H), 1.57 – 1.52 (m, 1H), 1.47 – 1.43 (m, 1H), 1.25 (d,  $J = 4.6$  Hz, 12H), 0.90 (dd,  $J = 9.5, 6.1$  Hz, 1H), 0.76 (dt,  $J = 12.3, 5.1$  Hz, 1H), 0.41 (d,  $J = 7.9$  Hz, 2H), 0.13 (dd,  $J = 8.8, 3.9$  Hz, 1H), 0.07 – 0.04 (m, 1H).  $^{13}\text{C NMR}$  (126 MHz,  $\text{CDCl}_3$ )  $\delta$  141.3, 136.3, 127.5, 119.5, 117.2, 105.4, 83.2, 31.6, 25.0, 24.8, 24.6, 13.4, 5.1, 4.8.  $^{11}\text{B NMR}$  (160 MHz,  $\text{CDCl}_3$ )  $\delta$  34.58, 34.03. **HRMS** (ESI,  $m/z$ ) calcd for  $\text{C}_{21}\text{H}_{29}\text{B}_2\text{N}_2\text{O}_2$   $[\text{M}+\text{H}]^+$ : 363.2410; found: 363.2401. **Specific rotation**:  $[\alpha]_{\text{D}}^{25} = -14.69^\circ$  ( $c = 0.49$ ,  $\text{CHCl}_3$ ). **HPLC analysis**: HPLC DAICEL CHIRALCEL OD, hexane/isopropanol = 95/5, 0.5 mL/min,  $\lambda = 280$  nm,  $t_{\text{R}}$  (major) = 26.8 min,  $t_{\text{R}}$  (minor) = 29.5 min, er = 93:7.

**(R)-2-(3,3-dimethyl-1-(4,4,5,5-tetramethyl-1,3,2-dioxaborolan-2-yl)butyl)-2,3-dihydro-1H-naphtho[1,8-de][1,3,2]diazaborinine (64)**

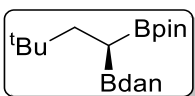

64

**The reaction was performed following the general procedure C.** The residue was purified by flash column chromatograph to give the product as a crystalline solid (42.4 mg, 56%).  $^1\text{H NMR}$  (500 MHz,  $\text{CDCl}_3$ )  $\delta$  7.11 – 7.06 (m, 2H), 7.00 (dd,  $J = 8.3, 1.8$  Hz, 2H), 6.26 (d,  $J = 7.2$  Hz, 2H), 5.60 (d,  $J = 18.6$  Hz, 2H), 1.35 – 1.27 (m, 12H), 1.26 (s, 2H), 1.24 – 1.17 (m, 9H), 0.91 – 0.86 (m, 1H).  $^{13}\text{C NMR}$  (126 MHz,  $\text{CDCl}_3$ )  $\delta$  141.3, 127.5, 117.2, 105.4, 83.2, 82.9, 40.3, 39.23 31.8, 31.6, 29.3, 29.2, 24.9, 24.8, 24.7, 24.6.  $^{11}\text{B NMR}$  (160 MHz,  $\text{CDCl}_3$ )  $\delta$  34.35, 34.06. **HRMS** (ESI,  $m/z$ ) calcd for  $\text{C}_{22}\text{H}_{33}\text{B}_2\text{N}_2\text{O}_2$   $[\text{M}+\text{H}]^+$ : 379.2723; found: 379.2723. **Specific rotation**:  $[\alpha]_{\text{D}}^{25} = -15.45^\circ$  ( $c = 0.44$ ,  $\text{CHCl}_3$ ). **HPLC analysis**: HPLC DAICEL CHIRALCEL OD, hexane/isopropanol = 99.0/1.0, 1.0 mL/min,  $\lambda = 280$  nm,  $t_{\text{R}}$  (major) = 5.8 min,  $t_{\text{R}}$  (minor) = 7.5 min, er = 85:15.

**(R)-2-(1-(4,4,5,5-tetramethyl-1,3,2-dioxaborolan-2-yl)pentyl)-2,3-dihydro-1H-naphtho[1,8-de][1,3,2]diazaborinine (65)**

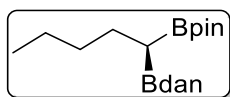

65

**The reaction was performed following the general procedure C.** The residue was purified by flash column chromatograph to give the product as a crystalline solid (49.5 mg, 68%).  $^1\text{H NMR}$  (500 MHz,  $\text{CDCl}_3$ )  $\delta$  7.09 (t,  $J = 7.8$  Hz, 2H), 6.99 (d,  $J = 8.2$  Hz, 2H), 6.29 (d,  $J = 7.3$  Hz, 2H), 5.80 (s, 2H), 1.67 – 1.59 (m, 1H), 1.54 (dd,  $J = 13.9, 7.4$  Hz, 1H), 1.37 – 1.31 (m, 4H), 1.25 (d,  $J = 6.1$  Hz, 12H), 0.91 (t,  $J = 6.9$  Hz, 3H), 0.75 (dd,  $J = 9.3, 6.3$  Hz, 1H).  $^{13}\text{C NMR}$  (126 MHz,  $\text{CDCl}_3$ )  $\delta$  141.4, 136.3, 127.5, 119.5, 117.2, 105.4, 83.1, 34.9, 34.6, 26.1, 25.0, 24.9, 24.5, 24.5, 22.8, 14.1.  $^{11}\text{B NMR}$  (160 MHz,  $\text{CDCl}_3$ )  $\delta$  34.66, 34.34. **HRMS** (ESI,  $m/z$ ) calcd for  $\text{C}_{21}\text{H}_{31}\text{B}_2\text{N}_2\text{O}_2$   $[\text{M}+\text{H}]^+$ : 365.2566; found: 365.2571. **Specific rotation**:  $[\alpha]_{\text{D}}^{25} = -11.27^\circ$  ( $c = 0.55$ ,  $\text{CHCl}_3$ ). **HPLC analysis**: HPLC DAICEL CHIRALCEL AD, hexane/isopropanol = 99.5/0.5, 1.4 mL/min,  $\lambda = 280$  nm,  $t_{\text{R}}$  (minor) = 5.2 min,  $t_{\text{R}}$  (major) = 6.3 min, er = 93:7.



**(R)-2-(1-(4,4,5,5-tetramethyl-1,3,2-dioxaborolan-2-yl)hexyl)-2,3-dihydro-1H-naphtho[1,8-de][1,3,2]diazaborinine (66)**

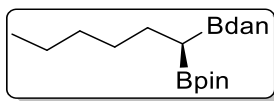

66

The reaction was performed following the general procedure C. The residue was purified by flash column chromatograph to give the product as a crystalline solid (54.4 mg, 72%). <sup>1</sup>H NMR (500 MHz, CDCl<sub>3</sub>) δ 7.10 (dd, *J* = 8.3, 7.3 Hz, 2H), 7.00 (dd, *J* = 8.3, 1.0 Hz, 2H), 6.30 (dd, *J* = 7.3, 1.0 Hz, 2H), 5.81 (s, 2H), 1.66 – 1.61 (m, 1H), 1.55 – 1.51 (m, 1H), 1.37 – 1.30 (m, 6H), 1.26 (d, *J* = 6.3 Hz, 12H), 0.93 – 0.89 (m, 3H), 0.76 (dd, *J* = 9.5, 6.0 Hz, 1H). <sup>13</sup>C NMR (126 MHz, CDCl<sub>3</sub>) δ 141.4, 136.3, 127.6, 119.5, 117.2, 105.4, 83.2, 32.1, 31.9, 26.4, 25.0, 24.5, 22.6, 14.1. <sup>11</sup>B NMR (160 MHz, CDCl<sub>3</sub>) δ 34.80, 33.92. HRMS (ESI, *m/z*) calcd for C<sub>22</sub>H<sub>32</sub>B<sub>2</sub>N<sub>2</sub>NaO<sub>2</sub> [M+Na]<sup>+</sup>: 401.2542; found: 401.2540. Specific rotation: [α]<sup>25</sup><sub>D</sub> = -7.72° (*c* = 1.32, CHCl<sub>3</sub>). HPLC analysis: HPLC DAICEL CHIRALCEL AD, hexane/isopropanol = 99.5/0.5, 1.4 mL/min, λ = 280 nm, *t<sub>R</sub>* (minor) = 6.2 min, *t<sub>R</sub>* (major) = 7.0 min, er = 94:6.

**(R)-2-(1-(4,4,5,5-tetramethyl-1,3,2-dioxaborolan-2-yl)heptyl)-2,3-dihydro-1H-naphtho[1,8-de][1,3,2]diazaborinine (67)**

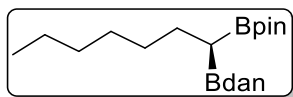

67

The reaction was performed following the general procedure C. The residue was purified by flash column chromatograph to give the product as a crystalline solid (58.1 mg, 74%). <sup>1</sup>H NMR (500 MHz, CDCl<sub>3</sub>) δ 7.10 – 7.07 (m, 2H), 6.98 (d, *J* = 7.3 Hz, 2H), 6.28 (d, *J* = 7.3 Hz, 2H), 5.78 (s, 2H), 1.54 (d, *J* = 7.3 Hz, 2H), 1.24 (s, 8H), 1.23 (s, 6H), 1.22 (s, 6H), 0.87 (d, *J* = 3.2 Hz, 3H), 0.74 – 0.72 (m, 1H). <sup>13</sup>C NMR (126 MHz, CDCl<sub>3</sub>) δ 141.4, 136.3, 127.5, 119.5, 117.2, 105.4, 83.1, 82.9, 32.6, 32.4, 31.8, 29.4, 29.3, 26.4, 25.7, 25.0, 24.9, 24.53, 24.50, 22.7, 22.6, 14.1. <sup>11</sup>B NMR (160 MHz, CDCl<sub>3</sub>) δ 34.88, 34.11. HRMS (ESI, *m/z*) calcd for C<sub>23</sub>H<sub>35</sub>B<sub>2</sub>N<sub>2</sub>O<sub>2</sub> [M+H]<sup>+</sup>: 393.2879; found: 393.2874. Specific rotation: [α]<sup>25</sup><sub>D</sub> = -10.7° (*c* = 1.43, CHCl<sub>3</sub>). HPLC analysis: HPLC DAICEL CHIRALCEL AD, hexane/isopropanol = 99.5/0.5, 0.5 mL/min, λ = 280 nm, *t<sub>R</sub>* (minor) = 12.5 min, *t<sub>R</sub>* (major) = 12.9 min, er = 94:6.

**(R)-2-(1-(4,4,5,5-tetramethyl-1,3,2-dioxaborolan-2-yl)octyl)-2,3-dihydro-1H-naphtho[1,8-de][1,3,2]diazaborinine (68)**

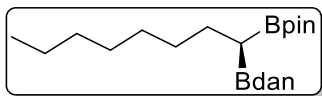

68

The reaction was performed following the general procedure C. The residue was purified by flash column chromatograph to give the product as a crystalline solid (63.4 mg, 78%). <sup>1</sup>H NMR (500 MHz, CDCl<sub>3</sub>) δ 7.10 – 7.06 (m, 2H), 6.98 (d, *J* = 8.2 Hz, 2H), 6.28 (d, *J* = 7.3 Hz, 2H), 5.79 (s, 2H), 1.57 – 1.41 (m, 2H), 1.27 (dd,

$J = 7.6, 2.5$  Hz, 10H), 1.25 (s, 6H), 1.24 (s, 6H), 0.88 (t,  $J = 6.8$  Hz, 3H), 0.75 – 0.72 (m, 1H).  $^{13}\text{C}$  NMR (126 MHz,  $\text{CDCl}_3$ )  $\delta$  141.4, 136.3, 127.5, 119.5, 117.2, 105.4, 83.1, 32.4, 31.9, 29.7, 29.2, 26.4, 25.0, 24.9, 24.5, 22.7, 14.1.  $^{11}\text{B}$  NMR (160 MHz,  $\text{CDCl}_3$ )  $\delta$  34.23, 33.23. HRMS (ESI,  $m/z$ ) calcd for  $\text{C}_{24}\text{H}_{36}\text{B}_2\text{N}_2\text{NaO}_2$   $[\text{M}+\text{Na}]^+$ : 429.2855; found: 429.2859. **Specific rotation:**  $[\alpha]_{\text{D}}^{25} = -8.29^\circ$  ( $c = 0.70$ ,  $\text{CHCl}_3$ ). **HPLC analysis:** HPLC DAICEL CHIRALCEL AD, hexane/isopropanol = 99.5/0.5, 0.5 mL/min,  $\lambda = 280$  nm,  $t_{\text{R}}$  (minor) = 15.9 min,  $t_{\text{R}}$  (major) = 16.3 min, er = 92:8.

**(R)-2-(1-(4,4,5,5-tetramethyl-1,3,2-dioxaborolan-2-yl)octyl)-2,3-dihydro-1H-naphtho[1,8-de][1,3,2]diazaborinine (69)**

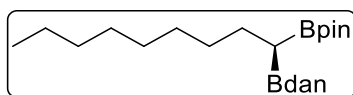

69

The reaction was performed following the general procedure C. The residue was purified by flash column chromatograph to give the product as a crystalline solid (58.8 mg, 70%).  $^1\text{H}$  NMR (500 MHz,  $\text{CDCl}_3$ )  $\delta$  7.10 (t,  $J = 7.8$  Hz, 2H), 7.00 (d,  $J = 8.2$  Hz, 2H), 6.30 (d,  $J = 7.3$  Hz, 2H), 5.81 (s, 2H), 1.67 – 1.61 (m, 1H), 1.55 – 1.50 (m, 1H), 1.34 – 1.27 (m, 12H), 1.26 (d,  $J = 6.2$  Hz, 12H), 0.90 (t,  $J = 6.8$  Hz, 3H), 0.76 (dd,  $J = 9.4, 6.0$  Hz, 1H).  $^{13}\text{C}$  NMR (126 MHz,  $\text{CDCl}_3$ )  $\delta$  141.4, 136.3, 127.6, 119.5, 117.2, 105.4, 83.2, 32.4, 31.9, 29.7, 29.5, 29.3, 26.4, 25.0, 24.5, 22.7, 14.1.  $^{11}\text{B}$  NMR (160 MHz,  $\text{CDCl}_3$ )  $\delta$  34.45, 34.19. HRMS (ESI,  $m/z$ ) calcd for  $\text{C}_{25}\text{H}_{39}\text{B}_2\text{N}_2\text{O}_2$   $[\text{M}+\text{H}]^+$ : 421.3192; found: 421.3195. **Specific rotation:**  $[\alpha]_{\text{D}}^{25} = -21.97^\circ$  ( $c = 1.22$ ,  $\text{CHCl}_3$ ). **HPLC analysis:** HPLC DAICEL CHIRALCEL AD, hexane/isopropanol = 99.5/0.5, 0.5 mL/min,  $\lambda = 280$  nm,  $t_{\text{R}}$  (minor) = 14.4 min,  $t_{\text{R}}$  (major) = 14.9 min, er = 96:4.

**(R)-2-(5-methyl-1-(4,4,5,5-tetramethyl-1,3,2-dioxaborolan-2-yl)hexyl)-2,3-dihydro-1H-naphtho[1,8-de][1,3,2]diazaborinine (70)**

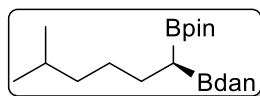

70

The reaction was performed following the general procedure C. The residue was purified by flash column chromatograph to give the product as a crystalline solid (52.3 mg, 67%).  $^1\text{H}$  NMR (500 MHz,  $\text{CDCl}_3$ )  $\delta$  7.09 (t,  $J = 7.8$  Hz, 2H), 6.99 (d,  $J = 8.2$  Hz, 2H), 6.29 (d,  $J = 7.2$  Hz, 2H), 5.80 (s, 2H), 1.64 – 1.60 (m, 1H), 1.53 (td,  $J = 8.1, 7.4, 4.5$  Hz, 2H), 1.37 (qd,  $J = 8.3, 5.5$  Hz, 4H), 1.26 (s, 3H), 1.25 (s, 5H), 1.24 (s, 4H), 1.23 (s, 3H), 0.88 (d,  $J = 6.6$  Hz, 3H), 0.85 (d,  $J = 6.5$  Hz, 3H), 0.76 (dt,  $J = 10.1, 5.2$  Hz, 1H).  $^{13}\text{C}$  NMR (126 MHz,  $\text{CDCl}_3$ )  $\delta$  141.4, 136.3, 127.5, 119.5, 117.2, 105.4, 83.1, 39.1, 30.1, 27.8, 26.6, 25.0, 24.9, 24.5, 24.5, 22.7, 22.6.  $^{11}\text{B}$  NMR (160 MHz,  $\text{CDCl}_3$ )  $\delta$  34.33, 33.33. HRMS (ESI,  $m/z$ ) calcd for  $\text{C}_{23}\text{H}_{34}\text{B}_2\text{N}_2\text{NaO}_2$   $[\text{M}+\text{Na}]^+$ : 415.2699; found: 415.2699. **Specific rotation:**  $[\alpha]_{\text{D}}^{25} = -4.04^\circ$  ( $c = 0.99$ ,  $\text{CHCl}_3$ ). **HPLC analysis:** HPLC DAICEL CHIRALCEL AD, hexane/isopropanol = 99.4/0.6, 1.4 mL/min,  $\lambda = 280$  nm,  $t_{\text{R}}$  (minor) = 5.0 min,  $t_{\text{R}}$  (major) = 5.2 min, er = 87:13.

**(R)-tert-butyl 4-(2-(1H-naphtho[1,8-de][1,3,2]diazaborinin-2(3H)-yl)-2-(4,4,5,5-tetramethyl-1,3,2-**

**dioxaborolan-2-yl)ethyl)piperidine-1-carboxylate (71)**

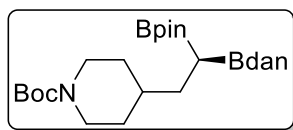

71

The reaction was performed following the general procedure C. The residue was purified by flash column chromatograph to give the product as a crystalline solid (72.8 mg, 72%). <sup>1</sup>H NMR (500 MHz, CDCl<sub>3</sub>) δ 7.13 – 7.07 (m, 2H), 7.04 – 6.96 (m, 2H), 6.33 – 6.27 (m, 2H), 5.76 (s, 2H), 4.08 (s, 4H), 2.65 (s, 4H), 1.45 (d, *J* = 3.5 Hz, 9H), 1.24 (s, 12H), 1.06 (d, *J* = 12.2 Hz, 2H), 0.85 (s, 1H), 0.81 – 0.71 (m, 1H). <sup>13</sup>C NMR (126 MHz, CDCl<sub>3</sub>) δ 155.2, 141.2, 136.3, 117.4, 105.5, 83.3, 79.3, 38.0, 33.0, 28.5, 25.0, 24.8, 24.5. <sup>11</sup>B NMR (160 MHz, CDCl<sub>3</sub>) δ 33.92, 33.33. HRMS (ESI, *m/z*) calcd for C<sub>21</sub>H<sub>31</sub>B<sub>2</sub>N<sub>2</sub>O<sub>2</sub> [M+H]<sup>+</sup>: 365.2566; found: 365.2571. Specific rotation: [α]<sup>25</sup><sub>D</sub> = -5.32° (*c* = 1.09, CHCl<sub>3</sub>). HPLC analysis: HPLC DAICEL CHIRALCEL AD, hexane/isopropanol = 90/10, 0.5 mL/min, λ = 280 nm, *t<sub>R</sub>* (minor) = 14.5 min, *t<sub>R</sub>* (major) = 15.6 min, er = 94:6.

**(R)-2-(4-((tert-butyldimethylsilyl)oxy)-1-(4,4,5,5-tetramethyl-1,3,2-dioxaborolan-2-yl)butyl)-2,3-dihydro-1H-naphtho[1,8-de][1,3,2]diazaborinine (72)**

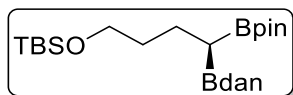

72

The reaction was performed following the general procedure C. The residue was purified by flash column chromatograph to give the product as a crystalline solid (60.5 mg, 63%). <sup>1</sup>H NMR (500 MHz, CDCl<sub>3</sub>) δ 7.11 (dd, *J* = 8.2, 7.3 Hz, 2H), 7.01 (dd, *J* = 8.3, 1.0 Hz, 2H), 6.30 (dd, *J* = 7.4, 1.0 Hz, 2H), 5.86 (s, 2H), 3.68 – 3.64 (m, 2H), 1.66 (dd, *J* = 13.6, 5.3 Hz, 2H), 1.63 – 1.56 (m, 2H), 1.26 (d, *J* = 5.3 Hz, 12H), 0.94 (s, 9H), 0.78 (dd, *J* = 8.7, 5.6 Hz, 1H), 0.09 (d, *J* = 1.0 Hz, 6H). <sup>13</sup>C NMR (126 MHz, CDCl<sub>3</sub>) δ 141.3, 136.3, 127.5, 119.5, 117.2, 105.4, 83.2, 82.9, 63.2, 35.4, 25.1, 24.9, 24.54, 24.52, 22.4, 18.4, -5.2. <sup>11</sup>B NMR (160 MHz, CDCl<sub>3</sub>) δ 34.08, 33.91. HRMS (ESI, *m/z*) calcd for C<sub>26</sub>H<sub>43</sub>B<sub>2</sub>N<sub>2</sub>O<sub>3</sub>Si [M+H]<sup>+</sup>: 481.3224; found: 481.3221. Specific rotation: [α]<sup>25</sup><sub>D</sub> = -2.30° (*c* = 0.87, CHCl<sub>3</sub>). HPLC analysis: HPLC DAICEL CHIRALCEL OD, hexane/isopropanol = 95/5, 1.0 mL/min, λ = 280 nm, *t<sub>R</sub>* (minor) = 3.9 min, *t<sub>R</sub>* (major) = 4.3 min, er = 90.5:9.5.

**(R)-2-(6-((tert-butyldimethylsilyl)oxy)-1-(4,4,5,5-tetramethyl-1,3,2-dioxaborolan-2-yl)hexyl)-2,3-dihydro-1H-naphtho[1,8-de][1,3,2]diazaborinine (73)**

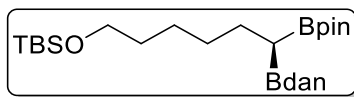

73

The reaction was performed following the general procedure C. The residue was purified by flash column chromatograph to give the product as a crystalline solid (70.2 mg, 69%). <sup>1</sup>H NMR (500 MHz, CDCl<sub>3</sub>) δ 7.08 (t, *J* = 7.8 Hz, 2H), 6.98 (d, *J* = 8.2 Hz, 2H), 6.28 (d, *J* = 7.3 Hz, 2H), 5.79 (s, 2H), 3.59 (d, *J* = 6.6 Hz, 2H), 1.55 – 1.48 (m, 4H), 1.35 (dd, *J* = 12.2, 6.6 Hz, 4H), 1.25 (s, 6H), 1.23 (s, 6H), 0.89 (s, 9H), 0.75 – 0.71 (m,

1H), 0.04 (s, 6H).  $^{13}\text{C}$  NMR (126 MHz,  $\text{CDCl}_3$ )  $\delta$  141.3, 136.3, 127.5, 119.5, 117.2, 105.4, 83.2, 63.3, 32.8, 32.2, 26.4, 26.0, 25.9, 25.0, 24.9, 24.5, 24.52, 24.50, 18.4, -5.2.  $^{11}\text{B}$  NMR (160 MHz,  $\text{CDCl}_3$ )  $\delta$  33.92, 33.51. **HRMS** (ESI,  $m/z$ ) calcd for  $\text{C}_{28}\text{H}_{47}\text{B}_2\text{N}_2\text{O}_3\text{Si}$   $[\text{M}+\text{H}]^+$ : 509.3537; found: 509.3530. **Specific rotation**:  $[\alpha]_{\text{D}}^{25} = -6.25^\circ$  ( $c = 0.64$ ,  $\text{CHCl}_3$ ). **HPLC analysis**: HPLC DAICEL CHIRALCEL OD, hexane/isopropanol = 99/1, 0.3 mL/min,  $\lambda = 280$  nm,  $t_{\text{R}}$  (minor) = 26.5 min,  $t_{\text{R}}$  (major) = 29.3 min, er = 94:6.

**(R)-2-(5-((tert-butylidiphenylsilyl)oxy)-1-(4,4,5,5-tetramethyl-1,3,2-dioxaborolan-2-yl)pentyl)-2,3-dihydro-1H-naphtho[1,8-de][1,3,2]diazaborinine (74)**

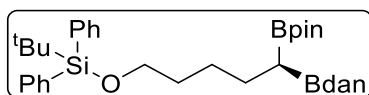

74

**The reaction was performed following the general procedure C.** The residue was purified by flash column chromatograph to give the product as a crystalline solid (91.5 mg, 74%).  $^1\text{H}$  NMR (500 MHz,  $\text{CDCl}_3$ )  $\delta$  7.70 – 7.67 (m, 4H), 7.40 (ddt,  $J = 12.1, 6.6, 3.5$  Hz, 6H), 7.10 (td,  $J = 7.8, 2.2$  Hz, 2H), 7.01 (dd,  $J = 8.4, 2.4$  Hz, 2H), 6.29 (dd,  $J = 7.4, 2.2$  Hz, 2H), 5.79 (d,  $J = 3.2$  Hz, 2H), 3.71 – 3.67 (m, 2H), 1.62 (dd,  $J = 7.7, 3.6$  Hz, 2H), 1.51 (h,  $J = 4.0, 3.4$  Hz, 2H), 1.42 – 1.39 (m, 1H), 1.31 (d,  $J = 2.8$  Hz, 1H), 1.25 (dd,  $J = 8.3, 2.4$  Hz, 12H), 1.06 (d,  $J = 3.5$  Hz, 9H), 0.75 (dd,  $J = 8.1, 3.8$  Hz, 1H).  $^{13}\text{C}$  NMR (126 MHz,  $\text{CDCl}_3$ )  $\delta$  141.4, 136.3, 135.6, 134.2, 129.5, 127.6, 127.6, 119.5, 117.2, 105.5, 83.2, 64.0, 32.8, 28.7, 26.9, 26.3, 25.0, 24.6, 19.2.  $^{11}\text{B}$  NMR (160 MHz,  $\text{CDCl}_3$ )  $\delta$  34.42, 34.10. **HRMS** (ESI,  $m/z$ ) calcd for  $\text{C}_{37}\text{H}_{48}\text{B}_2\text{KN}_2\text{O}_3\text{Si}$   $[\text{M}+\text{K}]^+$ : 657.3252; found: 657.3262. **Specific rotation**:  $[\alpha]_{\text{D}}^{25} = -4.97^\circ$  ( $c = 1.45$ ,  $\text{CHCl}_3$ ). **HPLC analysis**: HPLC DAICEL CHIRALCEL OD, hexane/isopropanol = 99/1, 1.0 mL/min,  $\lambda = 250$  nm,  $t_{\text{R}}$  (minor) = 22.1 min,  $t_{\text{R}}$  (major) = 26.8 min, er = 90:10.

**(R)-2-(1-(4,4,5,5-tetramethyl-1,3,2-dioxaborolan-2-yl)-5-((triisopropylsilyl)oxy)pentyl)-2,3-dihydro-1H-naphtho[1,8-de][1,3,2]diazaborinine (75)**

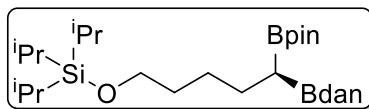

75

**The reaction was performed following the general procedure C.** The residue was purified by flash column chromatograph to give the product as a crystalline solid (74.0 mg, 69%).  $^1\text{H}$  NMR (500 MHz,  $\text{CDCl}_3$ )  $\delta$  7.12 – 7.07 (m, 2H), 7.00 (dd,  $J = 8.3, 0.9$  Hz, 2H), 6.30 (dd,  $J = 7.2, 1.0$  Hz, 2H), 5.81 (s, 2H), 3.70 (t,  $J = 6.5$  Hz, 2H), 1.72 – 1.64 (m, 1H), 1.62 – 1.55 (m, 3H), 1.51 – 1.45 (m, 1H), 1.26 (d,  $J = 5.5$  Hz, 12H), 1.24 (s, 2H), 1.13 – 1.10 (m, 2H), 1.08 (s, 13H), 0.78 (dd,  $J = 9.5, 5.8$  Hz, 1H).  $^{13}\text{C}$  NMR (126 MHz,  $\text{CDCl}_3$ )  $\delta$  141.4, 136.3, 127.5, 119.5, 117.2, 105.5, 83.2, 63.5, 33.3, 26.4, 25.0, 24.5, 18.1, 12.1.  $^{11}\text{B}$  NMR (160 MHz,  $\text{CDCl}_3$ )  $\delta$  34.32, 33.75. **HRMS** (ESI,  $m/z$ ) calcd for  $\text{C}_{30}\text{H}_{50}\text{B}_2\text{KN}_2\text{O}_3\text{Si}$   $[\text{M}+\text{K}]^+$ : 575.3408; found: 575.3411. **Specific rotation**:  $[\alpha]_{\text{D}}^{25} = -7.84^\circ$  ( $c = 1.16$ ,  $\text{CHCl}_3$ ). **HPLC analysis**: HPLC DAICEL CHIRALCEL AD, hexane/isopropanol = 99.7/0.3, 0.5 mL/min,  $\lambda = 280$  nm,  $t_{\text{R}}$  (minor) = 19.0 min,  $t_{\text{R}}$  (major) = 21.1 min, er = 92:8.

**(R)-5-(1H-naphtho[1,8-de][1,3,2]diazaborinin-2(3H)-yl)-5-(4,4,5,5-tetramethyl-1,3,2-dioxaborolan-2-yl)pentyl propionate (76)**

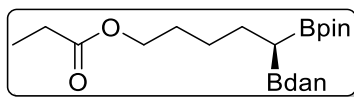

76

The reaction was performed following the general procedure C. The residue was purified by flash column chromatograph to give the product as a crystalline solid (56.7 mg, 65%). <sup>1</sup>H NMR (500 MHz, CDCl<sub>3</sub>) δ 7.11 – 7.06 (m, 2H), 6.99 (d, *J* = 8.2 Hz, 2H), 6.29 (d, *J* = 7.3 Hz, 2H), 5.79 (s, 2H), 4.06 (dt, *J* = 9.5, 5.2 Hz, 2H), 2.33 – 2.31 (m, 1H), 2.31 – 2.28 (m, 1H), 1.61 – 1.51 (m, 2H), 1.48 – 1.37 (m, 2H), 1.36 – 1.26 (m, 2H), 1.25 (s, 6H), 1.23 (s, 6H), 1.12 (t, *J* = 7.6 Hz, 3H), 0.75 (dd, *J* = 9.3, 6.1 Hz, 1H). <sup>13</sup>C NMR (126 MHz, CDCl<sub>3</sub>) δ 174.6, 141.3, 136.3, 127.5, 119.5, 117.3, 105.5, 83.2, 64.5, 64.3, 28.6, 28.55, 27.6, 26.0, 25.0, 24.9, 24.5, 9.2. <sup>11</sup>B NMR (160 MHz, CDCl<sub>3</sub>) δ 34.34, 34.09. HRMS (ESI, *m/z*) calcd for C<sub>24</sub>H<sub>35</sub>B<sub>2</sub>N<sub>2</sub>O<sub>4</sub> [M+H]<sup>+</sup>: 437.2777; found: 437.2774. Specific rotation: [α]<sub>D</sub><sup>25</sup> = -11.62° (*c* = 0.37, CHCl<sub>3</sub>). HPLC analysis: HPLC DAICEL CHIRALCEL OD, hexane/isopropanol = 97/3, 0.5 mL/min, λ = 280 nm, t<sub>R</sub> (major) = 23.0 min, t<sub>R</sub> (minor) = 26.1 min, er = 90:10.

**(R)-5-(1H-naphtho[1,8-de][1,3,2]diazaborinin-2(3H)-yl)-5-(4,4,5,5-tetramethyl-1,3,2-dioxaborolan-2-yl)pentyl (2E,4E)-hexa-2,4-dienoate (77)**

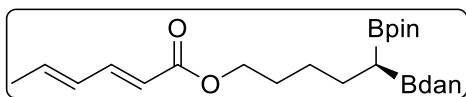

77

The reaction was performed following the general procedure C. The residue was purified by flash column chromatograph to give the product as a crystalline solid (43.6 mg, 46%). <sup>1</sup>H NMR (500 MHz, CDCl<sub>3</sub>) δ 7.08 (dd, *J* = 8.3, 7.3 Hz, 2H), 6.99 (dd, *J* = 8.3, 1.0 Hz, 2H), 6.29 (dd, *J* = 7.3, 1.0 Hz, 2H), 5.79 (s, 2H), 5.60 – 5.27 (m, 4H), 4.07 (dt, *J* = 6.6, 3.4 Hz, 2H), 2.35 – 2.32 (m, 2H), 2.30 – 2.27 (m, 2H), 1.63 (d, *J* = 1.2 Hz, 3H), 1.45 – 1.36 (m, 2H), 1.26 (s, 3H), 1.25 (s, 6H), 1.23 (s, 3H), 0.74 (dd, *J* = 9.3, 6.2 Hz, 1H). <sup>13</sup>C NMR (126 MHz, CDCl<sub>3</sub>) δ 173.4, 141.3, 136.3, 129.2, 127.6, 126.1, 117.3, 105.5, 83.2, 64.3, 34.4, 28.8, 28.6, 27.9, 26.0, 25.0, 24.8, 24.5, 17.9. <sup>11</sup>B NMR (160 MHz, CDCl<sub>3</sub>) δ 34.45, 33.68. HRMS (ESI, *m/z*) calcd for C<sub>27</sub>H<sub>37</sub>B<sub>2</sub>N<sub>2</sub>O<sub>4</sub> [M+H]<sup>+</sup>: 475.2934; found: 475.2929. Specific rotation: [α]<sub>D</sub><sup>25</sup> = -1.24° (*c* = 0.86, CHCl<sub>3</sub>). HPLC analysis: HPLC DAICEL CHIRALCEL AD, hexane/isopropanol = 90/10, 0.5 mL/min, λ = 280 nm, t<sub>R</sub> (major) = 14.4 min, t<sub>R</sub> (minor) = 15.7 min, er = 88:12.

**(R)-5-(1H-naphtho[1,8-de][1,3,2]diazaborinin-2(3H)-yl)-5-(4,4,5,5-tetramethyl-1,3,2-dioxaborolan-2-yl)pentyl 2-propylpentanoate (78)**

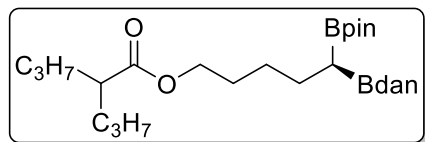

78

The reaction was performed following the general procedure C. The residue was purified by flash column chromatograph to give the product as a crystalline solid (64.8 mg, 64%). <sup>1</sup>H NMR (500 MHz, CDCl<sub>3</sub>) δ 7.08 (t, *J* = 7.8 Hz, 2H), 6.98 (d, *J* = 8.2 Hz, 2H), 6.29 (d, *J* = 7.3 Hz, 2H), 5.79 (s, 2H), 4.07 – 4.03 (m, 2H), 2.35 – 2.32 (m, 1H), 1.66 (d, *J* = 7.1 Hz, 2H), 1.57 (dd, *J* = 10.5, 4.9 Hz, 4H), 1.41 – 1.36 (m, 4H), 1.27 (d, *J* = 7.7 Hz, 4H), 1.24 (s, 3H), 1.23 (d, *J* = 2.4 Hz, 6H), 1.22 (s, 3H), 0.88 (d, *J* = 5.4 Hz, 6H), 0.75 – 0.72 (m, 1H). <sup>13</sup>C NMR (126 MHz, CDCl<sub>3</sub>) δ 176.7, 141.3, 136.3, 127.5, 119.5, 117.3, 105.5, 83.2, 83.0, 64.0, 45.4, 34.7, 28.9, 28.8, 28.6, 26.1, 25.0, 24.9, 24.5, 20.6, 14.0. <sup>11</sup>B NMR (160 MHz, CDCl<sub>3</sub>) δ 34.80, 34.45. HRMS (ESI, *m/z*) calcd for C<sub>29</sub>H<sub>45</sub>B<sub>2</sub>N<sub>2</sub>O<sub>4</sub> [M+H]<sup>+</sup>: 507.3560; found: 507.3559. **Specific rotation:** [α]<sup>25</sup><sub>D</sub> = 4.57° (*c* = 0.46, CHCl<sub>3</sub>). **HPLC analysis:** HPLC DAICEL CHIRALCEL OD, hexane/isopropanol = 97/3, 0.5 mL/min, λ = 280 nm, *t<sub>R</sub>* (major) = 12.8 min, *t<sub>R</sub>* (minor) = 14.3 min, er = 89:11.

**(R)-5-(1H-naphtho[1,8-de][1,3,2]diazaborinin-2(3H)-yl)-5-(4,4,5,5-tetramethyl-1,3,2-dioxaborolan-2-yl)pentyl benzoate (79)**

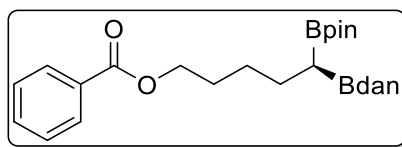

79

The reaction was performed following the general procedure C. The residue was purified by flash column chromatograph to give the product as a crystalline solid (66.8 mg, 69%). <sup>1</sup>H NMR (500 MHz, CDCl<sub>3</sub>) δ 8.06 (d, *J* = 1.4 Hz, 1H), 8.05 (d, *J* = 1.7 Hz, 1H), 7.55 – 7.52 (m, 1H), 7.41 (t, *J* = 7.8 Hz, 2H), 7.10 (t, *J* = 7.8 Hz, 2H), 7.01 (d, *J* = 8.3 Hz, 2H), 6.30 (d, *J* = 7.3 Hz, 2H), 5.84 (s, 2H), 4.35 (t, *J* = 6.6 Hz, 2H), 1.82 (t, *J* = 7.0 Hz, 2H), 1.67 – 1.47 (m, 4H), 1.25 (s, 6H), 1.23 (s, 6H), 0.80 (dd, *J* = 9.4, 5.7 Hz, 1H). <sup>13</sup>C NMR (126 MHz, CDCl<sub>3</sub>) δ 166.7, 141.3, 136.3, 132.8, 130.5, 129.6, 128.3, 127.6, 119.6, 117.3, 105.5, 83.2, 64.9, 28.9, 28.7, 26.1, 25.0, 24.87, 24.54, 24.51. <sup>11</sup>B NMR (160 MHz, CDCl<sub>3</sub>) δ 33.92, 32.98. HRMS (ESI, *m/z*) calcd for C<sub>28</sub>H<sub>35</sub>B<sub>2</sub>N<sub>2</sub>O<sub>4</sub> [M+H]<sup>+</sup>: 485.2777; found: 485.2773. **Specific rotation:** [α]<sup>25</sup><sub>D</sub> = -5.6° (*c* = 0.75, CHCl<sub>3</sub>). **HPLC analysis:** HPLC DAICEL CHIRALCEL OD, hexane/isopropanol = 95/5 1.0 mL/min, λ = 250 nm, *t<sub>R</sub>* (minor) = 18.4 min, *t<sub>R</sub>* (major) = 29.4 min, er = 90:10.

**(R)-5-(1H-naphtho[1,8-de][1,3,2]diazaborinin-2(3H)-yl)-5-(4,4,5,5-tetramethyl-1,3,2-dioxaborolan-2-yl)pentyl 4-methylbenzoate (80)**

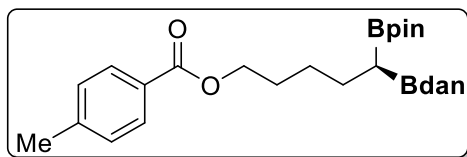

80

The reaction was performed following the general procedure C. The residue was purified by flash column chromatograph to give the product as a crystalline solid (67.9 mg, 66%). <sup>1</sup>H NMR (500 MHz, CDCl<sub>3</sub>) δ 7.93 (s, 1H), 7.92 (d, *J* = 1.8 Hz, 1H), 7.20 (s, 1H), 7.18 (s, 1H), 7.11 – 7.07 (m, 2H), 6.99 (d, *J* = 8.1 Hz, 2H), 6.28 (d, *J* = 7.3 Hz, 2H), 5.81 (s, 2H), 4.32 (t, *J* = 6.5 Hz, 2H), 2.39 (s, 3H), 1.82 – 1.78 (m, 2H), 1.67 – 1.59 (m, 2H), 1.56 – 1.49 (m, 2H), 1.24 (s, 3H), 1.23 (s, 3H), 1.23 (s, 3H), 1.22 (s, 3H), 0.80 – 0.76 (m, 1H). <sup>13</sup>C NMR (126 MHz, CDCl<sub>3</sub>) δ 166.8, 143.4, 141.3, 129.6, 129.0, 127.5, 117.3, 105.5, 83.2, 64.7, 28.9, 28.7, 26.1, 25.0, 24.9, 24.53, 24.50, 21.6. <sup>11</sup>B NMR (160 MHz, CDCl<sub>3</sub>) δ 34.97, 34.27. HRMS (ESI, *m/z*) calcd for C<sub>29</sub>H<sub>37</sub>B<sub>2</sub>N<sub>2</sub>O<sub>4</sub> [M+H]<sup>+</sup>:499.2934; found: 499.2932. **Specific rotation:** [α]<sub>D</sub><sup>25</sup> = -7.65° (*c* = 0.51, CHCl<sub>3</sub>). **HPLC analysis:** HPLC DAICEL CHIRALCEL OD, hexane/isopropanol = 95/5 1.0 mL/min, λ = 280 nm, *t<sub>R</sub>* (minor) = 18.9 min, *t<sub>R</sub>* (major) = 21.8 min, er = 88:12.

**(R)-5-(1H-naphtho[1,8-de][1,3,2]diazaborinin-2(3H)-yl)-5-(4,4,5,5-tetramethyl-1,3,2-dioxaborolan-2-yl)pentyl 4-cyclohexylbenzoate (81)**

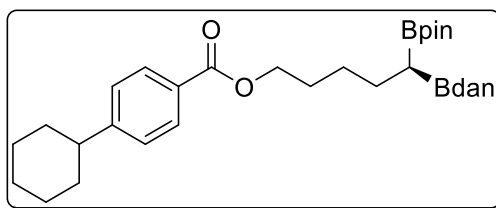

81

The reaction was performed following the general procedure C. The residue was purified by flash column chromatograph to give the product as a crystalline solid (74.8 mg, 66%). <sup>1</sup>H NMR (500 MHz, CDCl<sub>3</sub>) δ 7.96 (s, 1H), 7.95 (s, 1H), 7.22 (d, *J* = 8.3 Hz, 2H), 7.11 – 7.07 (m, 2H), 7.00 (d, *J* = 8.2 Hz, 2H), 6.29 (d, *J* = 7.3 Hz, 2H), 5.82 (s, 2H), 4.32 (t, *J* = 6.5 Hz, 2H), 2.56 – 2.52 (m, 1H), 1.87 – 1.85 (m, 4H), 1.79 (d, *J* = 6.9 Hz, 2H), 1.76 (t, *J* = 3.7 Hz, 2H), 1.66 – 1.58 (m, 2H), 1.57 – 1.50 (m, 2H), 1.40 (dd, *J* = 8.5, 3.7 Hz, 4H), 1.24 (s, 6H), 1.22 (s, 6H), 0.79 (ddd, *J* = 9.5, 6.2, 2.8 Hz, 1H). <sup>13</sup>C NMR (126 MHz, CDCl<sub>3</sub>) δ 166.8, 141.3, 129.7, 127.6, 126.8, 117.3, 105.5, 83.2, 64.7, 44.7, 34.2, 28.9, 28.8, 26.8, 26.1, 25.0, 24.9, 24.5, 24.5. <sup>11</sup>B NMR (160 MHz, CDCl<sub>3</sub>) δ 34.71, 33.02. HRMS (ESI, *m/z*) calcd for C<sub>34</sub>H<sub>45</sub>B<sub>2</sub>N<sub>2</sub>O<sub>4</sub> [M+H]<sup>+</sup>:567.3560; found: 567.3560. **Specific rotation:** [α]<sub>D</sub><sup>25</sup> = -4.66° (*c* = 0.88, CHCl<sub>3</sub>). **HPLC analysis:** HPLC DAICEL CHIRALCEL OD, hexane/isopropanol = 95/5, 1.0 mL/min, λ = 280 nm, *t<sub>R</sub>* (major) = 9.2 min, *t<sub>R</sub>* (minor) = 11.3 min, er = 85:15.

**(R)-5-(1H-naphtho[1,8-de][1,3,2]diazaborinin-2(3H)-yl)-5-(4,4,5,5-tetramethyl-1,3,2-dioxaborolan-2-yl)pentyl (E)-2-methyl-3-phenylacrylate (82)**

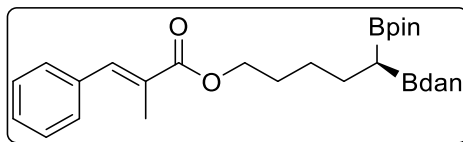

82

The reaction was performed following the general procedure C. The residue was purified by flash column chromatograph to give the product as a crystalline solid (51.4 mg, 49%). <sup>1</sup>H NMR (500 MHz, CDCl<sub>3</sub>) δ 7.69

(s, 1H), 7.41 – 7.37 (m, 4H), 7.32 (q,  $J = 5.2, 4.4$  Hz, 1H), 7.08 (t,  $J = 7.7$  Hz, 2H), 7.00 (d,  $J = 8.3$  Hz, 2H), 6.29 (d,  $J = 7.2$  Hz, 2H), 5.81 (s, 2H), 4.24 (td,  $J = 6.6, 1.9$  Hz, 2H), 2.11 (s, 3H), 1.76 (q,  $J = 7.1$  Hz, 2H), 1.65 – 1.43 (m, 4H), 1.24 (d,  $J = 6.7$  Hz, 12H), 0.90 (t,  $J = 6.8$  Hz, 1H).  $^{13}\text{C}$  NMR (126 MHz,  $\text{CDCl}_3$ )  $\delta$  168.8, 141.3, 138.7, 136.3, 135.96, 129.65, 128.36, 128.25, 127.56, 119.52, 117.30, 105.50, 83.25, 64.93, 28.87, 28.77, 26.12, 25.04, 24.51, 14.08.  $^{11}\text{B}$  NMR (160 MHz,  $\text{CDCl}_3$ )  $\delta$  33.24, 33.15. **HRMS** (ESI,  $m/z$ ) calcd for  $\text{C}_{31}\text{H}_{39}\text{B}_2\text{N}_2\text{O}_4$   $[\text{M}+\text{H}]^+$ : 525.3090; found: 525.3092. **Specific rotation**:  $[\alpha]_{\text{D}}^{25} = -8.48^\circ$  ( $c = 0.33$ ,  $\text{CHCl}_3$ ). **HPLC analysis**: HPLC DAICEL CHIRALCEL AD, hexane/isopropanol = 90/10, 0.5 mL/min,  $\lambda = 280$  nm,  $t_{\text{R}}$  (major) = 13.6 min,  $t_{\text{R}}$  (minor) = 14.9 min,  $e_r = 91:9$ .

**(R)-5-(1H-naphtho[1,8-de][1,3,2]diazaborinin-2(3H)-yl)-5-(4,4,5,5-tetramethyl-1,3,2-dioxaborolan-2-yl)pentyl (2R)-2-phenylpropanoate (83)**

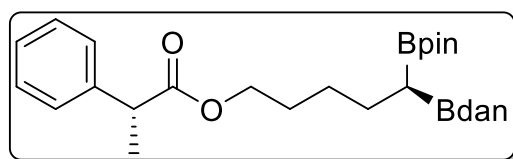

**83**

The reaction was performed following the **Condition C**. The residue was purified by flash column chromatograph (PE:EA=30:1) to give the product as a yellow oil liquid (60.4 mg, 59%).  $^1\text{H}$  NMR (500 MHz,  $\text{CDCl}_3$ )  $\delta$  7.32 – 7.28 (m, 5H), 7.10 (t,  $J = 7.8$  Hz, 2H), 7.00 (d,  $J = 8.3$  Hz, 2H), 6.30 (d,  $J = 7.3$  Hz, 2H), 5.78 (s, 2H), 4.07 (t,  $J = 6.8$  Hz, 2H), 3.70 (d,  $J = 7.3$  Hz, 1H), 1.62 (d,  $J = 7.1$  Hz, 2H), 1.49 (d,  $J = 7.3$  Hz, 3H), 1.27 (s, 2H), 1.25 (s, 6H), 1.23 (s, 6H), 1.22 (s, 2H), 0.72 – 0.68 (m, 1H).  $^{13}\text{C}$  NMR (126 MHz,  $\text{CDCl}_3$ )  $\delta$  174.6, 141.3, 136.3, 128.6, 127.6, 127.5, 127.1, 117.3, 105.5, 83.2, 64.7, 45.6, 28.7, 28.5, 26.0, 25.0, 24.9, 24.8, 24.54, 24.52, 18.5.  $^{11}\text{B}$  NMR (160 MHz,  $\text{CDCl}_3$ )  $\delta$  34.44, 33.92. **HRMS** (ESI,  $m/z$ ) calcd for  $\text{C}_{30}\text{H}_{39}\text{B}_2\text{N}_2\text{O}_4$   $[\text{M}+\text{H}]^+$ : 513.3090; found: 513.3094. **Specific rotation**:  $[\alpha]_{\text{D}}^{25} = -16.3^\circ$  ( $c = 1.00$ ,  $\text{CHCl}_3$ ).  $D_r > 95:5$ .

**(R)-5-(1H-naphtho[1,8-de][1,3,2]diazaborinin-2(3H)-yl)-5-(4,4,5,5-tetramethyl-1,3,2-dioxaborolan-2-yl)pentyl (S)-2-(4-isobutylphenyl)propanoate (84)**

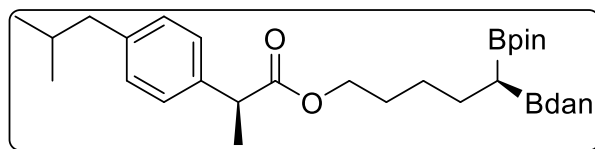

**84**

The reaction was performed following the **general procedure C**. The residue was purified by flash column chromatograph to give the product as a crystalline solid (64.8 mg, 57%).  $^1\text{H}$  NMR (500 MHz,  $\text{CDCl}_3$ )  $\delta$  7.18 (d,  $J = 7.9$  Hz, 2H), 7.08 (dd,  $J = 10.7, 7.8$  Hz, 4H), 7.00 (d,  $J = 8.2$  Hz, 2H), 6.30 (d,  $J = 7.3$  Hz, 2H), 5.78 (s, 2H), 4.09 – 4.04 (m, 2H), 3.67 (d,  $J = 7.2$  Hz, 1H), 2.43 (d,  $J = 7.3$  Hz, 2H), 1.85 – 1.82 (m, 1H), 1.61 (d,  $J = 6.9$  Hz, 2H), 1.47 (d,  $J = 7.2$  Hz, 3H), 1.34 (dq,  $J = 11.2, 3.6$  Hz, 2H), 1.27 (s, 3H), 1.25 (s, 3H), 1.23 (s, 6H), 0.89 (d,  $J = 6.6$  Hz, 6H), 0.72 – 0.69 (m, 1H).  $^{13}\text{C}$  NMR (126 MHz,  $\text{CDCl}_3$ )  $\delta$  174.9, 141.3, 140.5, 137.9, 136.3, 129.3, 127.6, 127.2, 119.5, 117.3, 105.5, 64.7, 45.2, 45.0, 30.2, 28.7, 28.5, 26.0, 25.0, 24.9, 24.8, 24.5,



22.4, 18.5.  $^{11}\text{B}$  NMR (160 MHz,  $\text{CDCl}_3$ )  $\delta$  34.62, 34.09. HRMS (ESI,  $m/z$ ) calcd for  $\text{C}_{34}\text{H}_{47}\text{B}_2\text{N}_2\text{O}_4$   $[\text{M}+\text{H}]^+$ : 569.3716; found: 569.3713. Specific rotation:  $[\alpha]_{\text{D}}^{25} = -3.03^\circ$  ( $c = 0.99$ ,  $\text{CHCl}_3$ ). Dr >95:5.

(R)-5-(1H-naphtho[1,8-de][1,3,2]diazaborinin-2(3H)-yl)-5-(4,4,5,5-tetramethyl-1,3,2-dioxaborolan-2-yl)pentyl (S)-2-(6-methoxynaphthalen-2-yl)propanoate (85)

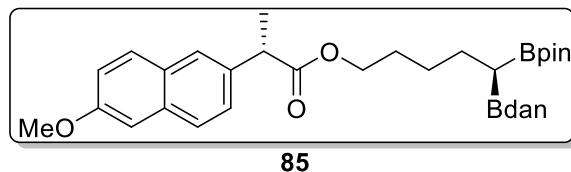

The reaction was performed following the general procedure C. The residue was purified by flash column chromatograph to give the product as a crystalline solid (69.9 mg, 59%).  $^1\text{H}$  NMR (500 MHz,  $\text{CDCl}_3$ )  $\delta$  7.74 – 7.70 (m, 3H), 7.46 (dd,  $J = 8.4, 1.9$  Hz, 1H), 7.16 (dd,  $J = 16.1, 8.2$  Hz, 4H), 7.06 (d,  $J = 8.2$  Hz, 2H), 6.34 (d,  $J = 7.3$  Hz, 2H), 5.84 (s, 2H), 4.18 – 4.12 (m, 2H), 3.91 (d,  $J = 5.5$  Hz, 3H), 3.88 (d,  $J = 7.2$  Hz, 1H), 1.66 (d,  $J = 7.2$  Hz, 2H), 1.63 (s, 3H), 1.53 (dt,  $J = 10.1, 6.4$  Hz, 2H), 1.38 – 1.33 (m, 2H), 1.28 – 1.26 (m, 12H), 0.73 – 0.68 (m, 1H).  $^{13}\text{C}$  NMR (126 MHz,  $\text{CDCl}_3$ )  $\delta$  177.9, 157.0, 141.2, 136.4, 136.3, 130.3, 127.5, 123.6, 120.7, 119.5, 117.3, 112.0, 105.5, 83.2, 68.0, 64.4, 42.1, 37.1, 28.8, 28.6, 26.1, 25.2, 25.0, 24.8, 24.5, 21.4, 15.8.  $^{11}\text{B}$  NMR (160 MHz,  $\text{CDCl}_3$ )  $\delta$  34.62, 33.51. HRMS (ESI,  $m/z$ ) calcd for  $\text{C}_{35}\text{H}_{43}\text{B}_2\text{N}_2\text{O}_5$   $[\text{M}+\text{H}]^+$ : 593.3353; found: 593.3346. Specific rotation:  $[\alpha]_{\text{D}}^{25} = 5.00^\circ$  ( $c = 0.50$ ,  $\text{CHCl}_3$ ). Dr > 95:5.

(R)-5-(1H-naphtho[1,8-de][1,3,2]diazaborinin-2(3H)-yl)-5-(4,4,5,5-tetramethyl-1,3,2-dioxaborolan-2-yl)pentyl (1R,2S,4R)-bicyclo[2.2.1]hept-5-ene-2-carboxylate (86)

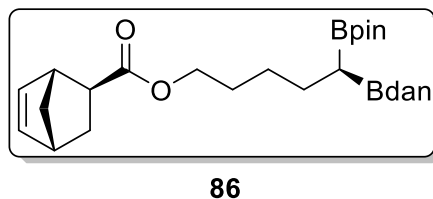

The reaction was performed following the general procedure C. The residue was purified by flash column chromatograph to give the product as a crystalline solid (60.0 mg, 60%).  $^1\text{H}$  NMR (500 MHz,  $\text{CDCl}_3$ )  $\delta$  7.09 (t,  $J = 7.7$  Hz, 2H), 6.99 (d,  $J = 8.2$  Hz, 2H), 6.29 (d,  $J = 7.2$  Hz, 2H), 6.12 (dd,  $J = 5.7, 3.1$  Hz, 1H), 6.09 – 6.06 (m, 1H), 5.79 (s, 2H), 4.11 – 4.07 (m, 2H), 3.02 (s, 1H), 2.89 (s, 1H), 2.22 – 2.19 (m, 1H), 1.93 – 1.89 (m, 1H), 1.67 (dd,  $J = 12.3, 5.1$  Hz, 4H), 1.51 (d,  $J = 8.4$  Hz, 2H), 1.39 – 1.31 (m, 4H), 1.24 (d,  $J = 6.6$  Hz, 12H), 0.75 (dd,  $J = 9.4, 6.1$  Hz, 1H).  $^{13}\text{C}$  NMR (126 MHz,  $\text{CDCl}_3$ )  $\delta$  176.3, 141.3, 138.0, 136.3, 135.8, 127.5, 117.3, 105.5, 64.4, 46.6, 46.4, 43.2, 41.6, 30.3, 28.9, 28.6, 26.1, 25.0, 24.8, 24.5.  $^{11}\text{B}$  NMR (160 MHz,  $\text{CDCl}_3$ )  $\delta$  35.22, 34.45. HRMS (ESI,  $m/z$ ) calcd for  $\text{C}_{29}\text{H}_{38}^{10}\text{B}_2\text{KN}_2\text{O}_4$   $[\text{M}+\text{K}]^+$ : 537.2722; found: 537.2725. Specific rotation:  $[\alpha]_{\text{D}}^{25} = -7.4^\circ$  ( $c = 0.50$ ,  $\text{CHCl}_3$ ). Dr >95:5.

(R)-2-(2-phenyl-1-(4,4,5,5-tetramethyl-1,3,2-dioxaborolan-2-yl)ethyl)-2,3-dihydro-1H-naphtho[1,8-de][1,3,2]diazaborinine (87<sup>a</sup>)

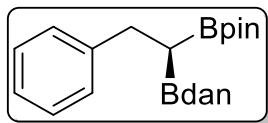

**87<sup>a</sup>**

The reaction was performed following the general procedure C. The residue was purified by flash column chromatograph to give the product as a crystalline solid (34.2 mg, 43%). <sup>1</sup>H NMR (500 MHz, CDCl<sub>3</sub>) δ 7.25 (s, 4H), 7.17 – 7.14 (m, 1H), 7.08 (t, *J* = 7.8 Hz, 2H), 6.99 (d, *J* = 8.2 Hz, 2H), 6.27 (d, *J* = 7.3 Hz, 2H), 5.81 (s, 2H), 2.96 (dd, *J* = 14.1, 9.6 Hz, 1H), 2.91 – 2.86 (m, 1H), 1.28 – 1.25 (m, 1H), 1.18 (s, 6H), 1.16 (s, 6H). <sup>13</sup>C NMR (126 MHz, CDCl<sub>3</sub>) δ 143.7, 141.2, 136.3, 128.3, 128.2, 127.5, 125.7, 119.5, 117.3, 105.5, 83.4, 32.0, 24.9, 24.5. <sup>11</sup>B NMR (160 MHz, CDCl<sub>3</sub>) δ 34.27, 33.68. HRMS (ESI, *m/z*) calcd for C<sub>24</sub>H<sub>29</sub>B<sub>2</sub>N<sub>2</sub>O<sub>2</sub> [M+H]<sup>+</sup>: 399.2410; found: 399.2418. **Specific rotation:** [α]<sup>25</sup><sub>D</sub> = -0.96° (*c* = 0.52, CHCl<sub>3</sub>). **HPLC analysis:** HPLC DAICEL CHIRALCEL OD, hexane/isopropanol = 95/5, 0.5 mL/min, λ = 210 nm, *t<sub>R</sub>* (major) = 17.2 min, *t<sub>R</sub>* (minor) = 19.6 min, *er* = 71:29.

(*S*)-2-(2-phenyl-1-(4,4,5,5-tetramethyl-1,3,2-dioxaborolan-2-yl)ethyl)-2,3-dihydro-1H-naphtho[1,8-de][1,3,2]diazaborinine (**87<sup>b</sup>**)

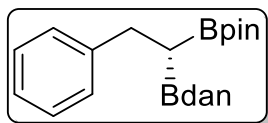

**87<sup>b</sup>**

The reaction was performed following the general procedure D. The residue was purified by flash column chromatograph to give the product as a crystalline solid (41.4 mg, 52%). <sup>1</sup>H NMR (500 MHz, CDCl<sub>3</sub>) δ 7.25 (s, 4H), 7.17 – 7.14 (m, 1H), 7.08 (t, *J* = 7.8 Hz, 2H), 6.99 (d, *J* = 8.2 Hz, 2H), 6.27 (d, *J* = 7.3 Hz, 2H), 5.81 (s, 2H), 2.96 (dd, *J* = 14.1, 9.6 Hz, 1H), 2.91 – 2.86 (m, 1H), 1.28 – 1.25 (m, 1H), 1.18 (s, 6H), 1.16 (s, 6H). <sup>13</sup>C NMR (126 MHz, CDCl<sub>3</sub>) δ 141.3, 140.6, 136.3, 135.1, 129.0, 128.1, 127.6, 119.6, 117.3, 105.5, 83.4, 31.5, 29.7, 25.0, 24.8, 24.5, 21.0. <sup>11</sup>B NMR (160 MHz, CDCl<sub>3</sub>) δ 34.27, 33.68. HRMS (ESI, *m/z*) calcd for C<sub>24</sub>H<sub>29</sub>B<sub>2</sub>N<sub>2</sub>O<sub>2</sub> [M+H]<sup>+</sup>: 399.2410; found: 399.2418. **Specific rotation:** [α]<sup>25</sup><sub>D</sub> = 3.39° (*c* = 0.62, CHCl<sub>3</sub>). **HPLC analysis:** HPLC DAICEL CHIRALCEL OD, hexane/isopropanol = 95/5, 0.5 mL/min, λ = 210 nm, *t<sub>R</sub>* (minor) = 17.0 min, *t<sub>R</sub>* (major) = 19.3 min, *er* = 9:91.

(*S*)-2-(1-(4,4,5,5-tetramethyl-1,3,2-dioxaborolan-2-yl)-2-(*p*-tolyl)ethyl)-2,3-dihydro-1H-naphtho[1,8-de][1,3,2]diazaborinine (**88**)

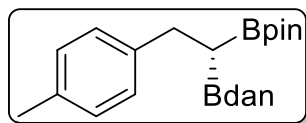

**88**

The reaction was performed following the general procedure D. The residue was purified by flash column chromatograph to give the product as a crystalline solid (48.6 mg, 59%). <sup>1</sup>H NMR (500 MHz, CDCl<sub>3</sub>) δ 7.17

(d,  $J = 7.8$  Hz, 2H), 7.11 – 7.07 (m, 4H), 7.00 (d,  $J = 8.2$  Hz, 2H), 6.28 (d,  $J = 7.3$  Hz, 2H), 5.83 (s, 2H), 2.95 (dd,  $J = 14.2, 9.3$  Hz, 1H), 2.87 (t,  $J = 4.7$  Hz, 1H), 2.32 (s, 3H), 1.20-1.26 (m, 1H), 1.21 (s, 6H), 1.19 (s, 6H).  $^{13}\text{C NMR}$  (126 MHz,  $\text{CDCl}_3$ )  $\delta$  141.2 (s), 140.6 (s), 136.3 (s), 135.1 (s), 128.9 (s), 128.0 (s), 127.5 (s), 119.5 (s), 117.3 (s), 105.5 (s), 83.3 (s), 31.5 (s), 25.0 (s), 24.5 (s), 21.0 (s).  $^{11}\text{B NMR}$  (160 MHz,  $\text{CDCl}_3$ )  $\delta$  34.27, 34.09. **HRMS** (ESI,  $m/z$ ) calcd for  $\text{C}_{25}\text{H}_{30}\text{B}_2\text{N}_2\text{NaO}_2$   $[\text{M}+\text{Na}]^+$ : 435.2386; found: 435.2381. **Specific rotation**:  $[\alpha]_{\text{D}}^{25} = 4.5^\circ$  ( $c = 0.22$ ,  $\text{CHCl}_3$ ). **HPLC analysis**: HPLC DAICEL CHIRALCEL AD, hexane/isopropanol = 95/5, 0.5 mL/min,  $\lambda = 280$  nm,  $t_{\text{R}}$  (major) = 14.8 min,  $t_{\text{R}}$  (minor) = 24.0 min, er = 86:14.

**(S)-2-(1-(4,4,5,5-tetramethyl-1,3,2-dioxaborolan-2-yl)-2-(m-tolyl)ethyl)-2,3-dihydro-1H-naphtho[1,8-de][1,3,2]diazaborinine (99)**

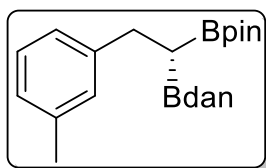

**89**

**The reaction was performed following the general procedure D.** The residue was purified by flash column chromatograph to give the product as a crystalline solid (46.9 mg, 57%).  $^1\text{H NMR}$  (500 MHz,  $\text{CDCl}_3$ )  $\delta$  7.14 (d,  $J = 7.5$  Hz, 1H), 7.08 (t,  $J = 7.8$  Hz, 5H), 6.99 (d,  $J = 8.2$  Hz, 3H), 6.27 (d,  $J = 7.3$  Hz, 2H), 5.81 (s, 2H), 2.92 (dd,  $J = 14.0, 9.7$  Hz, 1H), 2.84 (dd,  $J = 14.1, 6.5$  Hz, 1H), 2.31 (s, 3H), 1.21 (s, 1H), 1.19 (s, 6H), 1.17 (s, 6H).  $^{13}\text{C NMR}$  (126 MHz,  $\text{CDCl}_3$ )  $\delta$  143.7 (s), 141.2 (s), 137.7 (s), 129.0 (s), 128.2 (s), 127.5 (s), 126.4 (s), 125.2 (s), 117.3 (s), 105.5 (s), 83.3 (s), 31.9 (s), 25.0 (s), 24.5 (s), 21.4 (s).  $^{11}\text{B NMR}$  (160 MHz,  $\text{CDCl}_3$ )  $\delta$  34.32, 34.09. **HRMS** (ESI,  $m/z$ ) calcd for  $\text{C}_{25}\text{H}_{30}\text{B}_2\text{N}_2\text{NaO}_2$   $[\text{M}+\text{Na}]^+$ : 435.2386; found: 435.2391. **Specific rotation**:  $[\alpha]_{\text{D}}^{25} = 5.28^\circ$  ( $c = 0.53$ ,  $\text{CHCl}_3$ ). **HPLC analysis**: HPLC DAICEL CHIRALCEL AD, hexane/isopropanol = 95/5, 0.5 mL/min,  $\lambda = 210$  nm,  $t_{\text{R}}$  (major) = 11.9 min,  $t_{\text{R}}$  (minor) = 14.2 min, er = 79.5:20.5.

**(S)-2-(2-(4-ethylphenyl)-1-(4,4,5,5-tetramethyl-1,3,2-dioxaborolan-2-yl)ethyl)-2,3-dihydro-1H-naphtho[1,8-de][1,3,2]diazaborinine (90)**

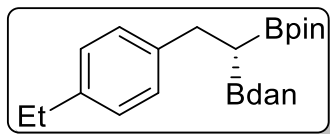

**90**

**The reaction was performed following the general procedure D.** The residue was purified by flash column chromatograph to give the product as a crystalline solid (37.9 mg, 46%).  $^1\text{H NMR}$  (500 MHz,  $\text{CDCl}_3$ )  $\delta$  7.14 (d,  $J = 7.9$  Hz, 2H), 7.10 – 7.05 (m, 4H), 6.98 (d,  $J = 8.2$  Hz, 2H), 6.26 (d,  $J = 7.3$  Hz, 2H), 5.81 (s, 2H), 2.93 (dd,  $J = 14.2, 9.3$  Hz, 1H), 2.84 (dd,  $J = 14.2, 6.8$  Hz, 1H), 2.30 (s, 3H), 1.26 (s, 2H), 1.18 (d,  $J = 8.4$  Hz, 12H), 1.15 – 1.13 (m, 1H).  $^{13}\text{C NMR}$  (126 MHz,  $\text{CDCl}_3$ )  $\delta$  141.2 (s), 140.6 (s), 135.1 (s), 128.9 (s), 128.0 (s), 127.5 (s), 117.3 (s), 105.5 (s), 83.3 (s), 31.5 (s), 25.0 (s), 24.5 (s), 21.0 (s).  $^{11}\text{B NMR}$  (160 MHz,  $\text{CDCl}_3$ )  $\delta$  34.45, 34.09. **HRMS** (ESI,  $m/z$ ) calcd for  $\text{C}_{26}\text{H}_{33}\text{B}_2\text{N}_2\text{O}_2$   $[\text{M}+\text{H}]^+$ : 427.2723; found: 427.2722. **Specific**

**rotation:**  $[\alpha]_{D}^{25} = 7.63^{\circ}$  ( $c = 0.76$ ,  $\text{CHCl}_3$ ). **HPLC analysis:** HPLC DAICEL CHIRALCEL AD, hexane/isopropanol = 95/5, 0.5 mL/min,  $\lambda = 250$  nMMm,  $t_R$  (major) = 14.7 min,  $t_R$  (minor) = 21.2 min, er = 78:22.

**(R)-2-(2-(4-propylphenyl)-1-(4,4,5,5-tetramethyl-1,3,2-dioxaborolan-2-yl)ethyl)-2,3-dihydro-1H-naphtho[1,8-de][1,3,2]diazaborinine (91)**

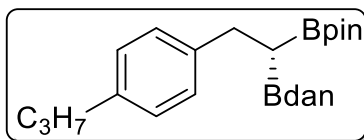

**91**

**The reaction was performed following the general procedure D.** The residue was purified by flash column chromatograph to give the product as a crystalline solid (45.8 mg, 52%).  **$^1\text{H NMR}$**  (500 MHz,  $\text{CDCl}_3$ )  $\delta$  7.19 (d,  $J = 7.8$  Hz, 2H), 7.10 (t,  $J = 7.8$  Hz, 4H), 7.01 (dd,  $J = 8.3, 1.0$  Hz, 2H), 6.28 (dd,  $J = 7.3, 1.0$  Hz, 2H), 5.84 (s, 2H), 2.96 (dd,  $J = 14.2, 9.4$  Hz, 1H), 2.88 (dd,  $J = 14.1, 6.9$  Hz, 1H), 2.58 – 2.55 (m, 2H), 1.66 – 1.61 (m, 2H), 1.24 – 1.22 (m, 1H), 1.20 (d,  $J = 7.8$  Hz, 12H), 0.94 (t,  $J = 7.3$  Hz, 3H).  **$^{13}\text{C NMR}$**  (126 MHz,  $\text{CDCl}_3$ )  $\delta$  141.3, 140.9, 140.0, 136.3, 128.4, 128.1, 127.6, 119.6, 117.3, 105.5, 83.4, 37.7, 31.6, 24.9, 24.7, 24.5, 13.8.  **$^{11}\text{B NMR}$**  (160 MHz,  $\text{CDCl}_3$ )  $\delta$  33.68, 32.10. **HRMS** (ESI,  $m/z$ ) calcd for  $\text{C}_{27}\text{H}_{35}\text{B}_2\text{N}_2\text{O}_2$   $[\text{M}+\text{H}]^+$ : 441.2879; found: 441.2878. **Specific rotation:**  $[\alpha]_{D}^{25} = 8.8^{\circ}$  ( $c = 0.68$ ,  $\text{CHCl}_3$ ). **HPLC analysis:** HPLC DAICEL CHIRALCEL AD, hexane/isopropanol = 95/5, 0.5 mL/min,  $\lambda = 210$  nm,  $t_R$  (major) = 13.4 min,  $t_R$  (minor) = 17.8 min, er = 77:23.

**2-(4-phenylbutyl-1-d)-2,3-dihydro-1H-naphtho[1,8-de][1,3,2]diazaborinine (97)**

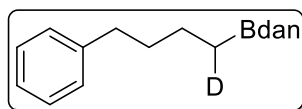

**97**

**The reaction was performed following the general procedure F.** The residue was purified by flash column chromatograph to give the product as a crystalline solid (44.5 mg, 74%).  **$^1\text{H NMR}$**  (500 MHz,  $\text{CDCl}_3$ )  $\delta$  7.32 – 7.28 (m, 2H), 7.22 – 7.18 (m, 3H), 7.10 (td,  $J = 7.7, 2.8$  Hz, 2H), 7.01 (dd,  $J = 8.3, 2.8$  Hz, 2H), 6.28 (d,  $J = 10.2$  Hz, 2H), 5.57 (s, 2H), 2.66 (dt,  $J = 7.8, 3.9$  Hz, 2H), 1.73 – 1.67 (m, 2H), 1.47 (d,  $J = 8.2$  Hz, 2H), 0.87 (t,  $J = 9.0$  Hz, 1H).  **$^{13}\text{C NMR}$**  (126 MHz,  $\text{CDCl}_3$ )  $\delta$  142.60, 141.16, 136.33, 128.46, 128.33, 127.55, 125.71, 119.57, 117.38, 105.43, 35.78, 34.10, 24.31.  **$^{11}\text{B NMR}$**  (160 MHz,  $\text{CDCl}_3$ )  $\delta$  32.35. **HRMS** (ESI,  $m/z$ ) calcd for  $\text{C}_{20}\text{H}_{21}\text{DBN}_2$   $[\text{M}+\text{H}]^+$ : 302.1933; found: 302.1933.

### 3.5 DFT Data

#### Computational Method

Density functional theory (DFT) calculations were carried out with the *Gaussian 16*<sup>3</sup> package. All geometry optimizations were performed using the dispersion-corrected B3LYP<sup>4,7</sup> functional with Grimme's D3 dispersion correction<sup>8</sup>, with a mixed basis set of SDD<sup>9</sup> for Cu and Fe and 6-31G(d) for other atoms. Normal mode vibrational frequency calculations at the same level confirmed that the optimized structures are minima (no imaginary frequency) or transition states (with one imaginary frequency). Single point energies were calculated with the SMD solvation model in cyclohexane ( $\epsilon = 2.0$ ) with the M06-L<sup>10</sup> functional and a mixed basis set of SDD for Cu and Fe and 6-311+G(d,p) for other atoms<sup>11-12</sup>. Free energies were corrected using Truhlar's quasiharmonic correction, by raising vibrational frequencies that are below 100  $\text{cm}^{-1}$  to 100  $\text{cm}^{-1}$ .<sup>13</sup> In regard to the standard state change from 1 atm to 1 M at 298.15 K, a correction of  $RT\ln(C_s/C_g)$  ( $= 1.9$  kcal/mol) was added to the Gibbs free energy ( $C_s$  is the concentration in solution phase and  $C_g$  is the concentration in gas phase).<sup>14-16</sup> DFT-optimized structures are illustrated using *CYLVView* v1.0 software.<sup>17</sup>

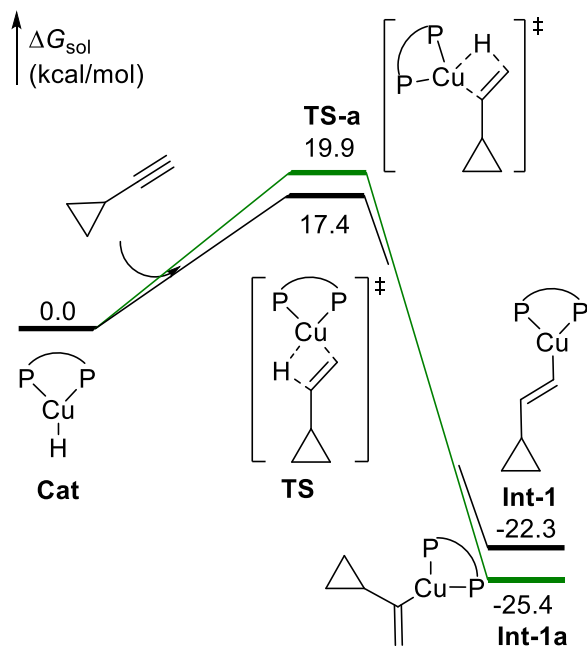

**Supplementary Figure 18. DFT calculations on the proposed reaction pathway.** Free energy profile for the 1,2- or 2,1-insertion of cyclopropyl alkyne into copper hydride.

## 4. Supplementary Figures

### 4.1 NMR Spectroscopic Data

2-(4-phenyl-1-(4,4,5,5-tetramethyl-1,3,2-dioxaborolan-2-yl)butyl)-2,3-dihydro-1H-naphtho[1,8-de][1,3,2]diazaborinine (4)

$^1\text{H}$  NMR (500 MHz, room temperature,  $\text{CDCl}_3$ )

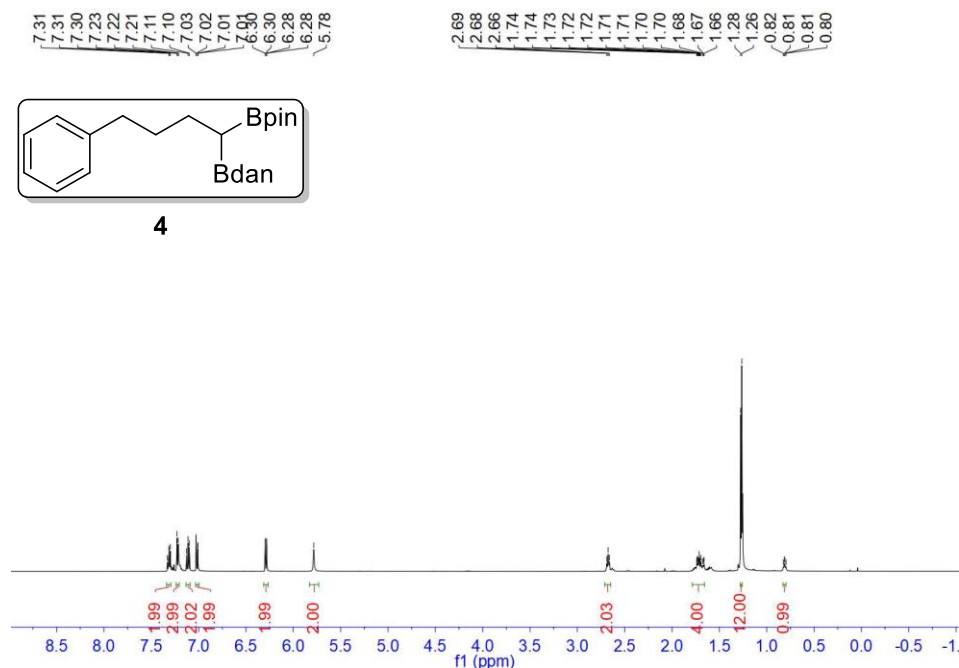

Supplementary Figure 19.  $^1\text{H}$  NMR spectrum of compound 4

$^{13}\text{C}$  NMR (126 MHz, room temperature,  $\text{CDCl}_3$ )

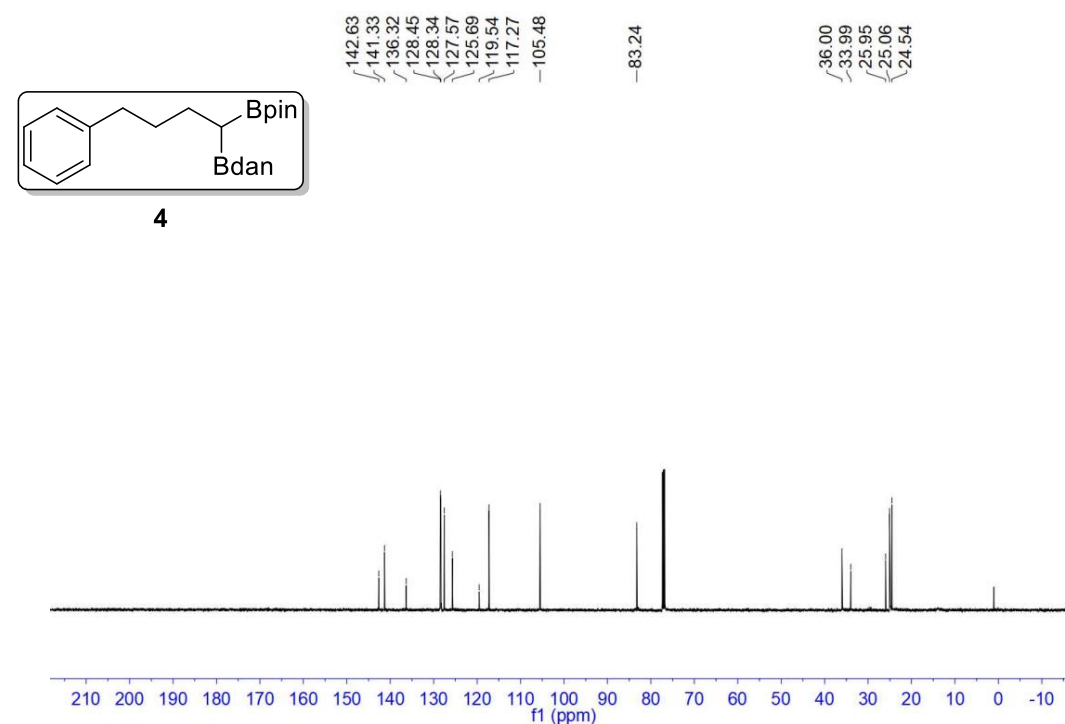

Supplementary Figure 20.  $^{13}\text{C}$  NMR spectrum of compound 4

**<sup>11</sup>B NMR (160 MHz, room temperature, CDCl<sub>3</sub>)**

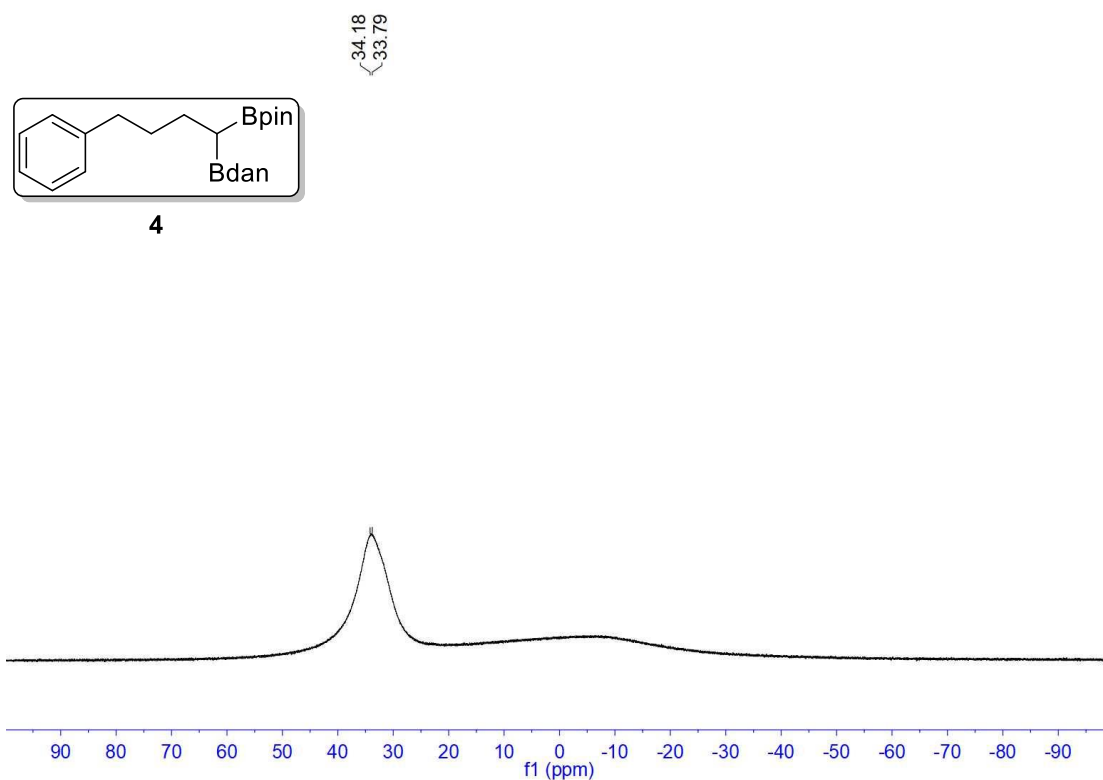

**Supplementary Figure 21. <sup>11</sup>B NMR spectrum of compound 4**

**2-(3-phenyl-1-(4,4,5,5-tetramethyl-1,3,2-dioxaborolan-2-yl)propyl)-2,3-dihydro-1H-naphtho[1,8-de][1,3,2]diazaborinine (5)**

**<sup>1</sup>H NMR (500 MHz, room temperature, CDCl<sub>3</sub>)**

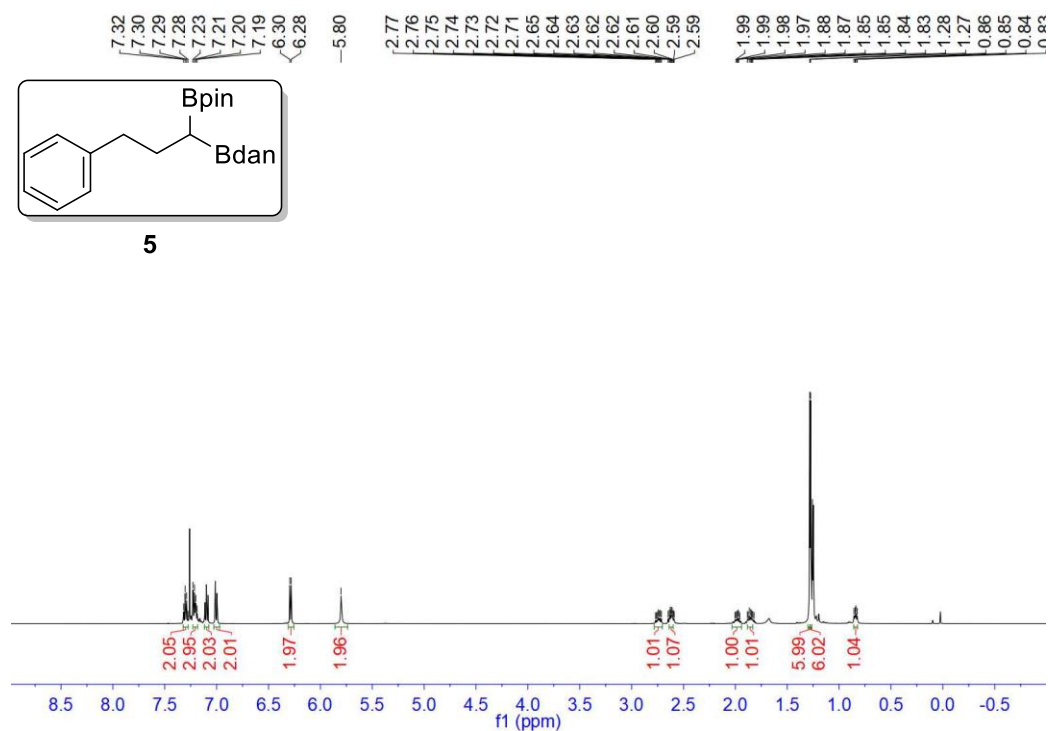

**Supplementary Figure 22. <sup>1</sup>H NMR spectrum of compound 5**

$^{13}\text{C}$  NMR (126 MHz, room temperature,  $\text{CDCl}_3$ )

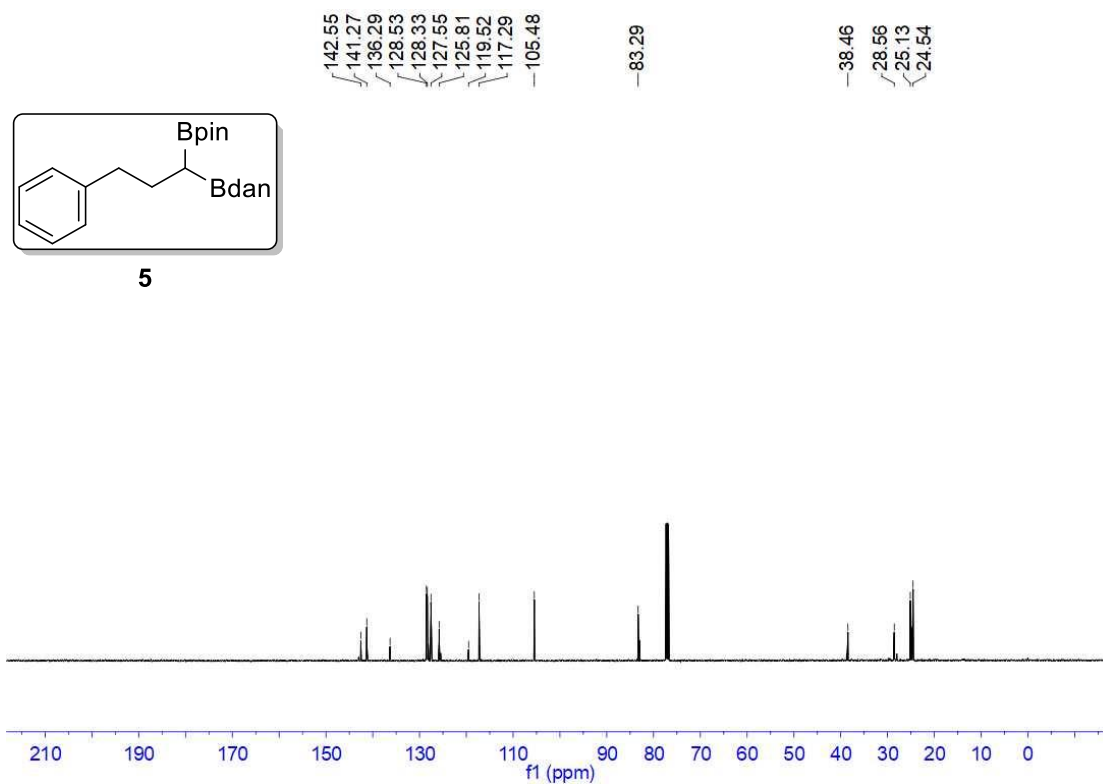

Supplementary Figure 23.  $^{13}\text{C}$  NMR spectrum of compound 5

$^{11}\text{B}$  NMR (160 MHz, room temperature,  $\text{CDCl}_3$ )

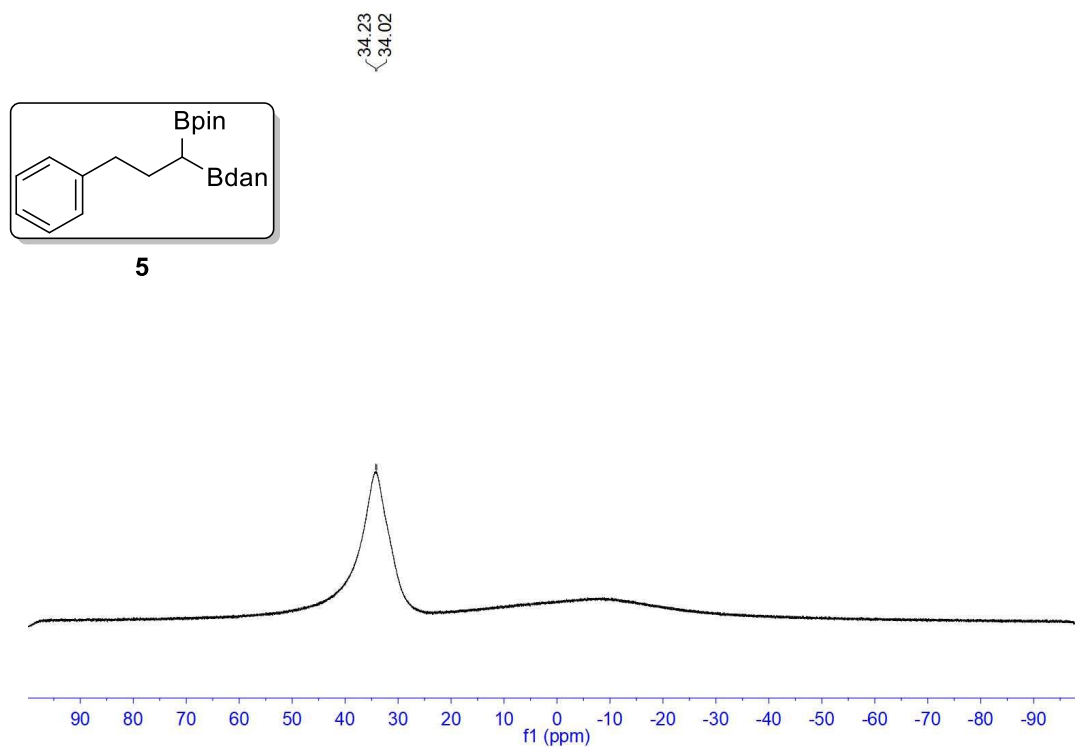

Supplementary Figure 24.  $^{11}\text{B}$  NMR spectrum of compound 5



2-(2-cyclopropyl-1-(4,4,5,5-tetramethyl-1,3,2-dioxaborolan-2-yl)  
naphtho[1,8-de][1,3,2]diazaborinine (6)

ethyl)-2,3-dihydro-1H-

<sup>1</sup>H NMR (500 MHz, room temperature, (CDCl<sub>3</sub>))

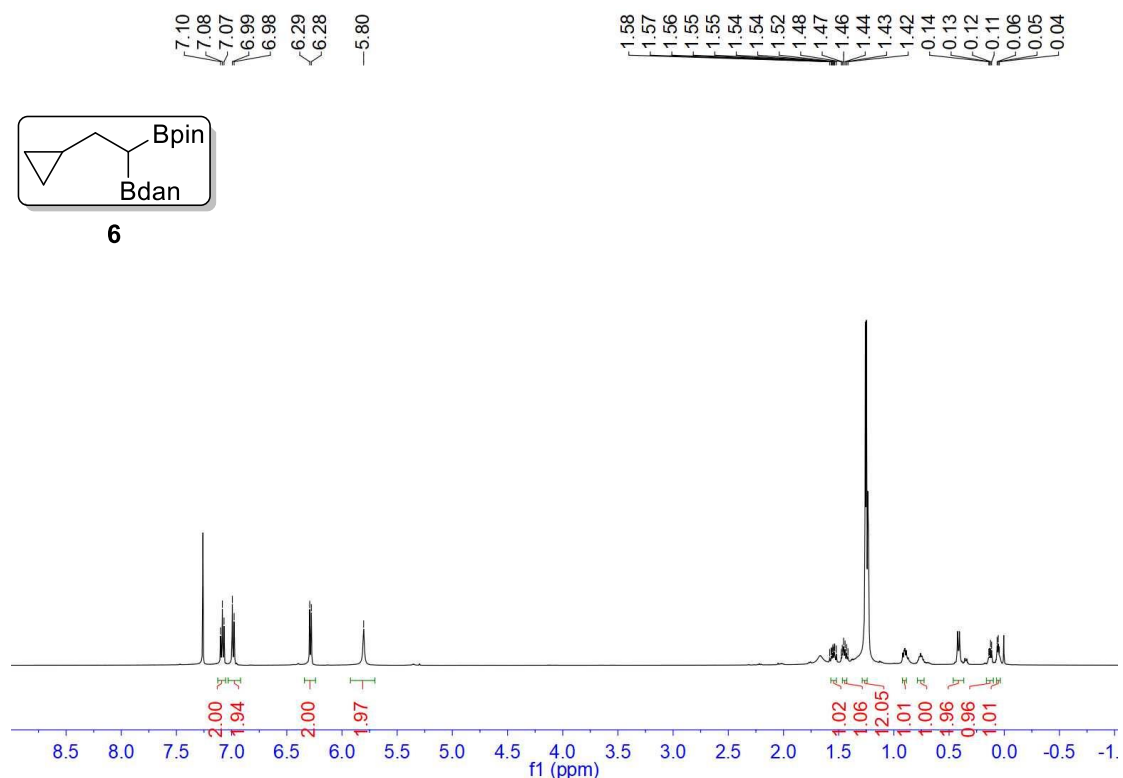

Supplementary Figure 25. <sup>1</sup>H NMR spectrum of compound 6

<sup>13</sup>C NMR (126 MHz, room temperature, CDCl<sub>3</sub>)

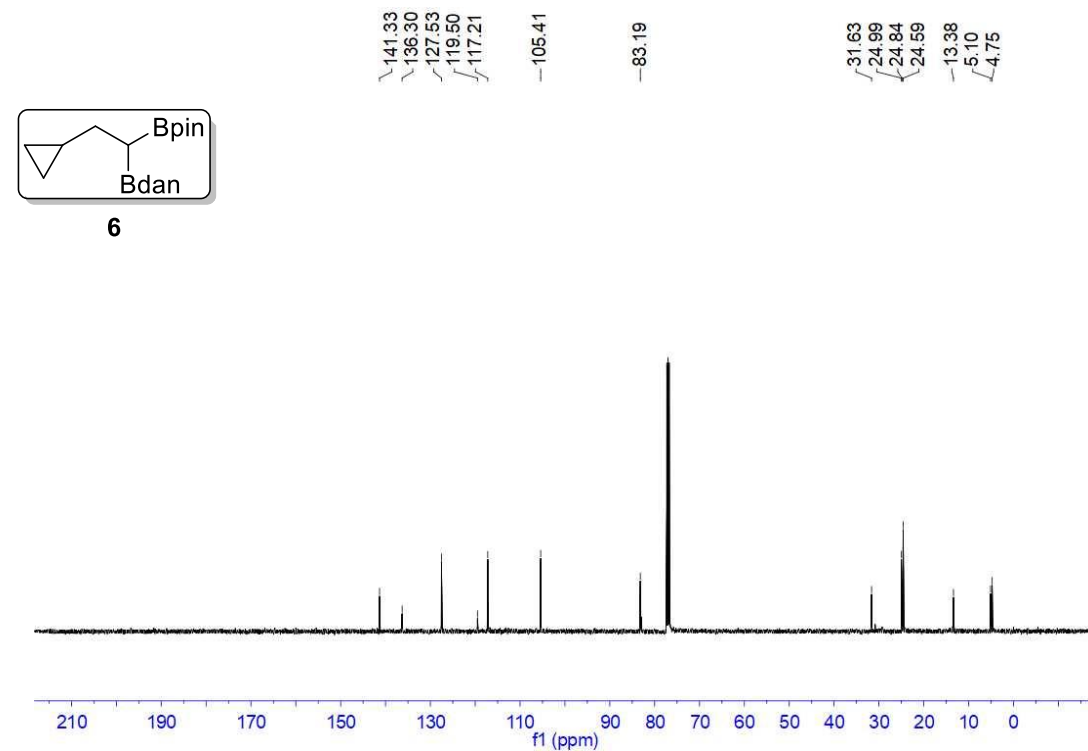

Supplementary Figure 26. <sup>13</sup>C NMR spectrum of compound 6

<sup>11</sup>B NMR (160 MHz, room temperature, CDCl<sub>3</sub>)

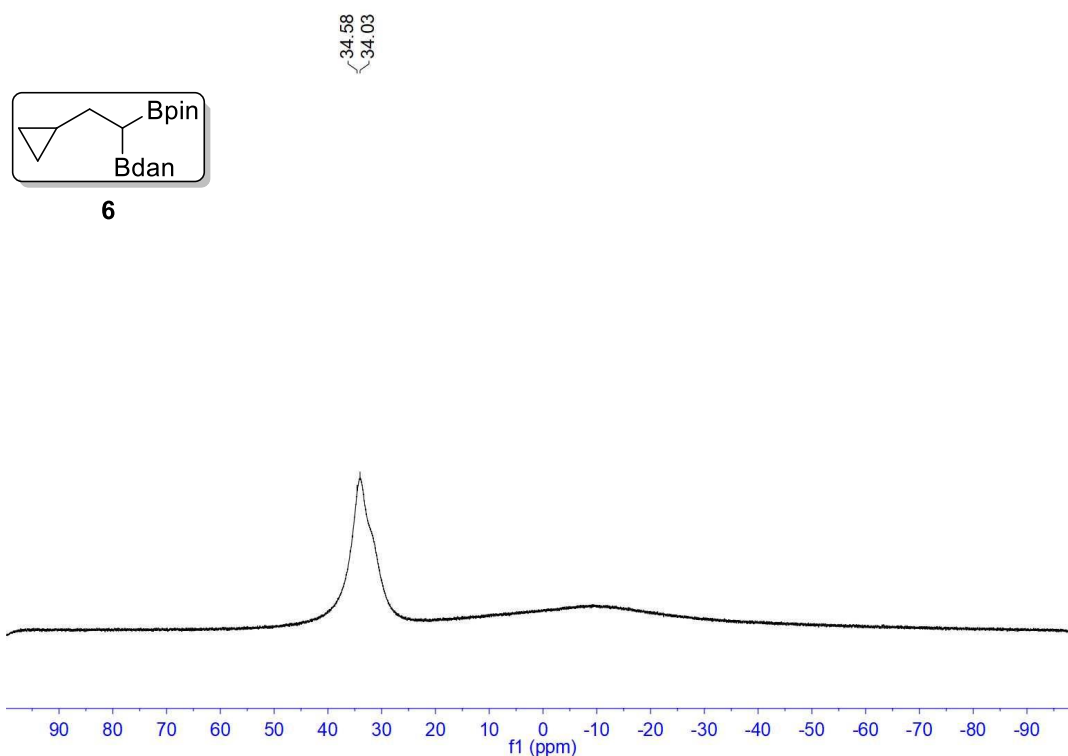

Supplementary Figure 27. <sup>11</sup>B NMR spectrum of compound 6

2-(3-cyclohexyl-1-(4,4,5,5-tetramethyl-1,3,2-dioxaborolan-2-yl)propyl) -2,3-dihydro-1H-naphtho[1,8-de][1,3,2]diazaborinine (7)

<sup>1</sup>H NMR (500 MHz, room temperature, CDCl<sub>3</sub>)

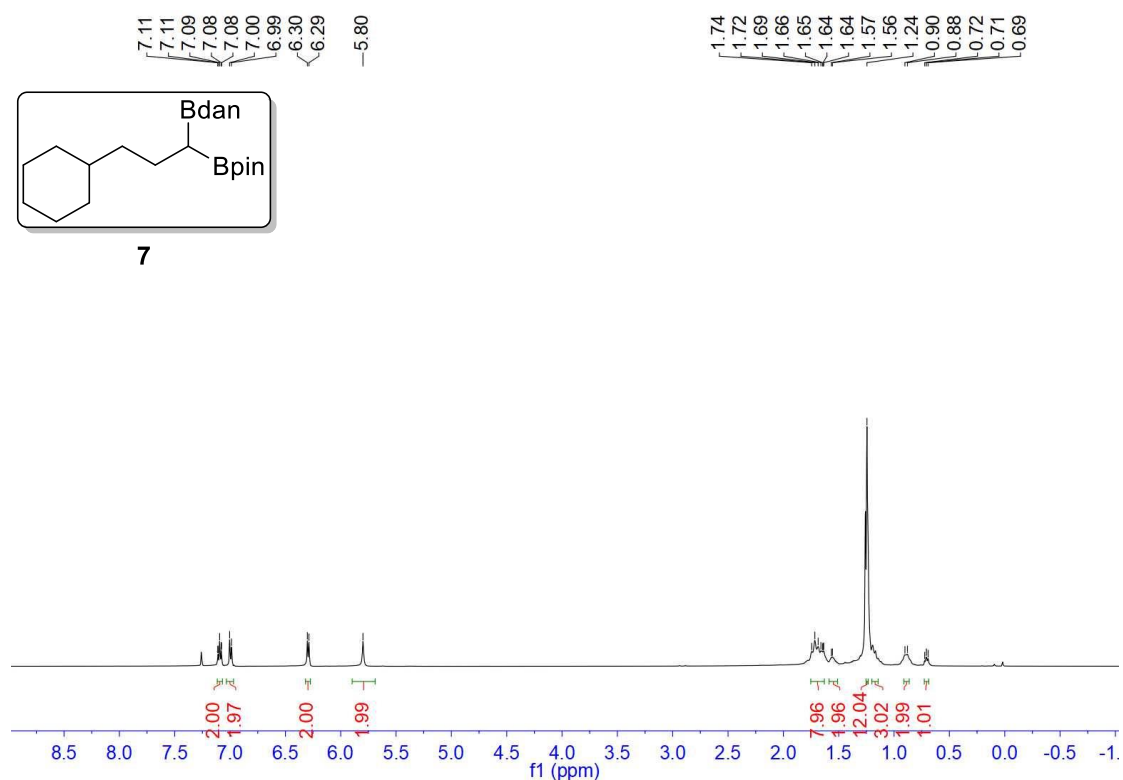

Supplementary Figure 28. <sup>1</sup>H NMR spectrum of compound 7

$^{13}\text{C}$  NMR (126 MHz, room temperature,  $\text{CDCl}_3$ )

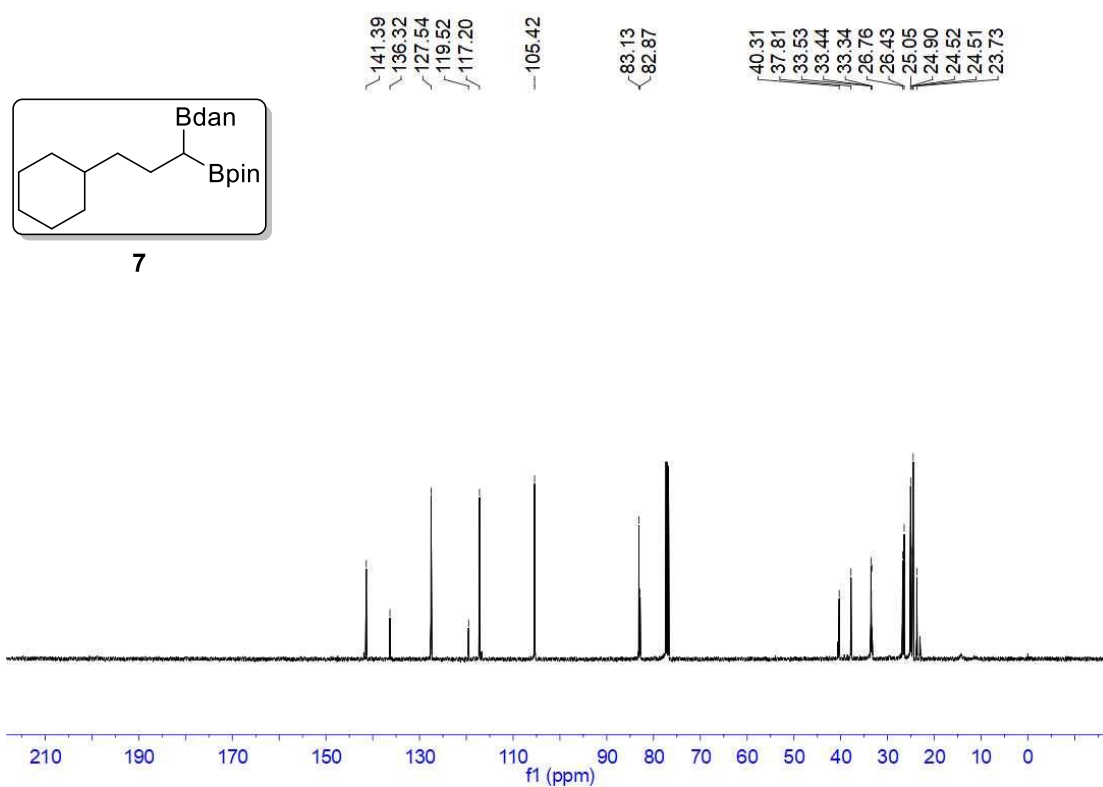

Supplementary Figure 29.  $^{13}\text{C}$  NMR spectrum of compound 7

$^{11}\text{B}$  NMR (160 MHz, room temperature,  $\text{CDCl}_3$ )

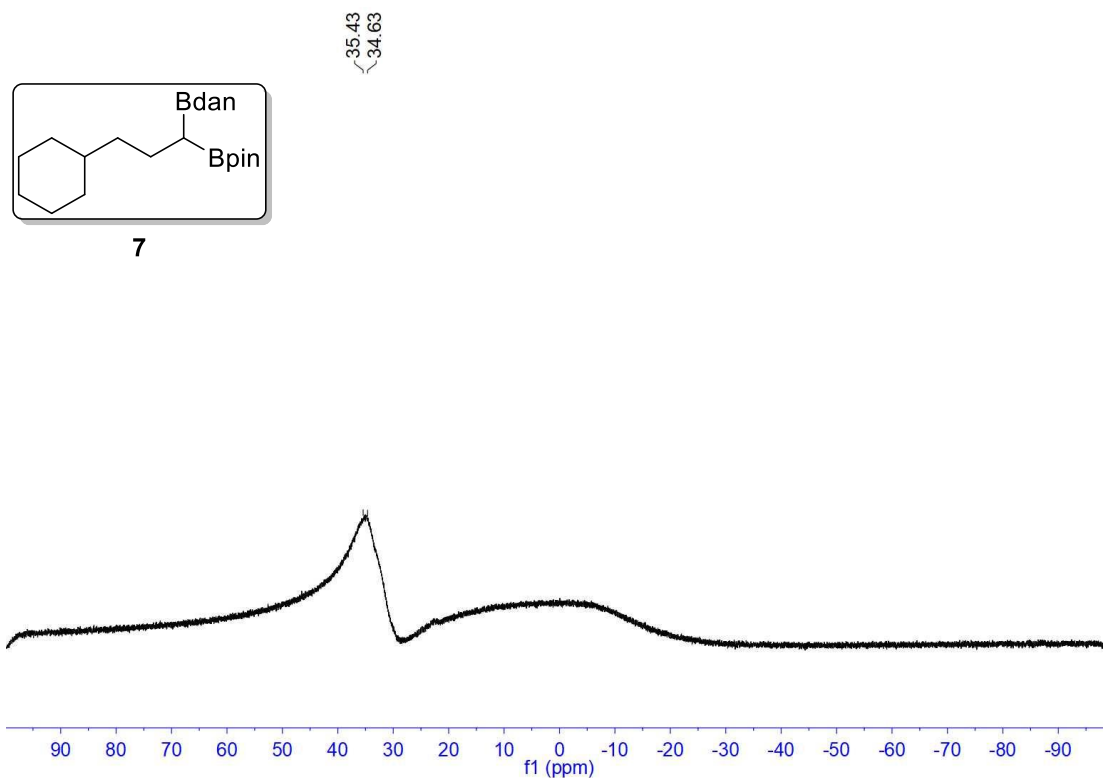

Supplementary Figure 30.  $^{11}\text{B}$  NMR spectrum of compound 7

2-(2-cyclopentyl-1-(4,4,5,5-tetramethyl-1,3,2-dioxaborolan-2-yl)ethyl)naphtho[1,8-de][1,3,2]diazaborinine (8)

-2,3-dihydro-1H-

$^1\text{H}$  NMR (500 MHz, room temperature,  $\text{CDCl}_3$ )

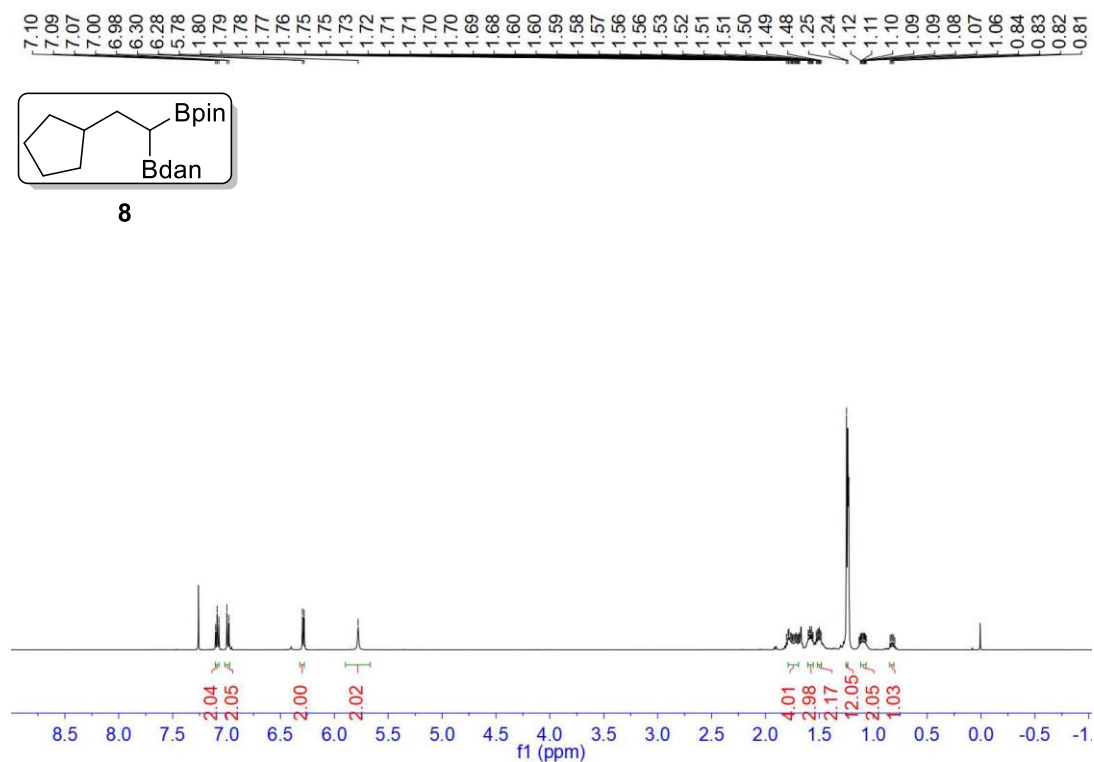

Supplementary Figure 31.  $^1\text{H}$  NMR spectrum of compound 8

$^{13}\text{C}$  NMR (126 MHz, room temperature,  $\text{CDCl}_3$ )

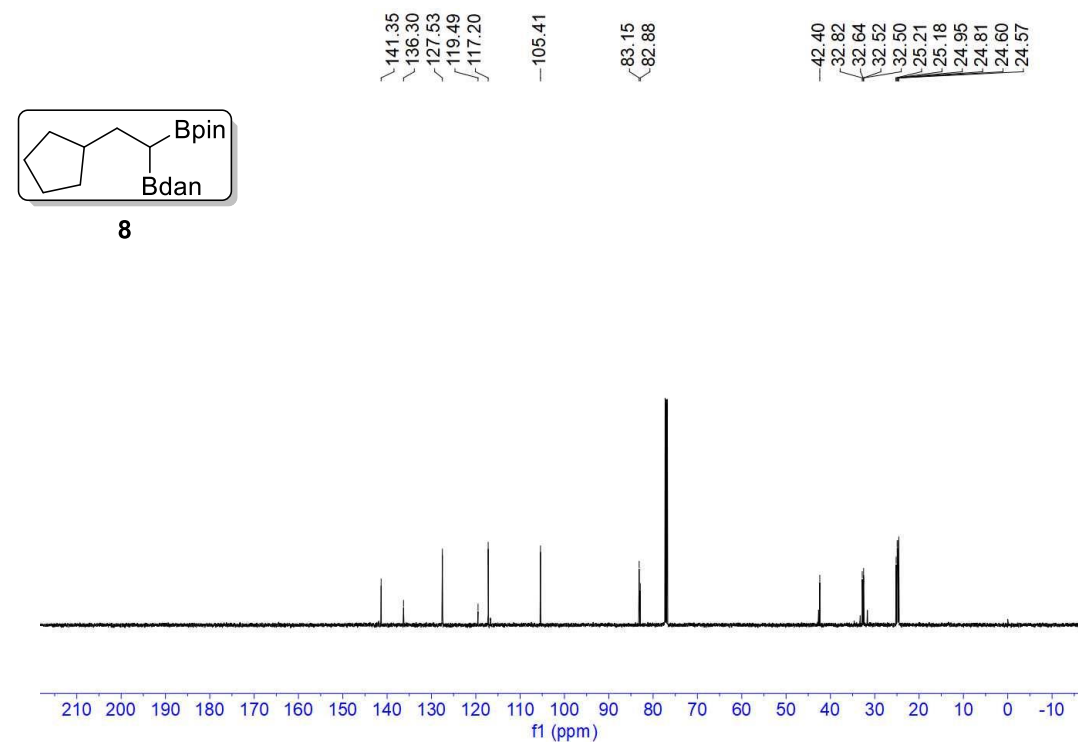

Supplementary Figure 32.  $^{13}\text{C}$  NMR spectrum of compound 8

$^{11}\text{B}$  NMR (160 MHz, room temperature,  $\text{CDCl}_3$ )

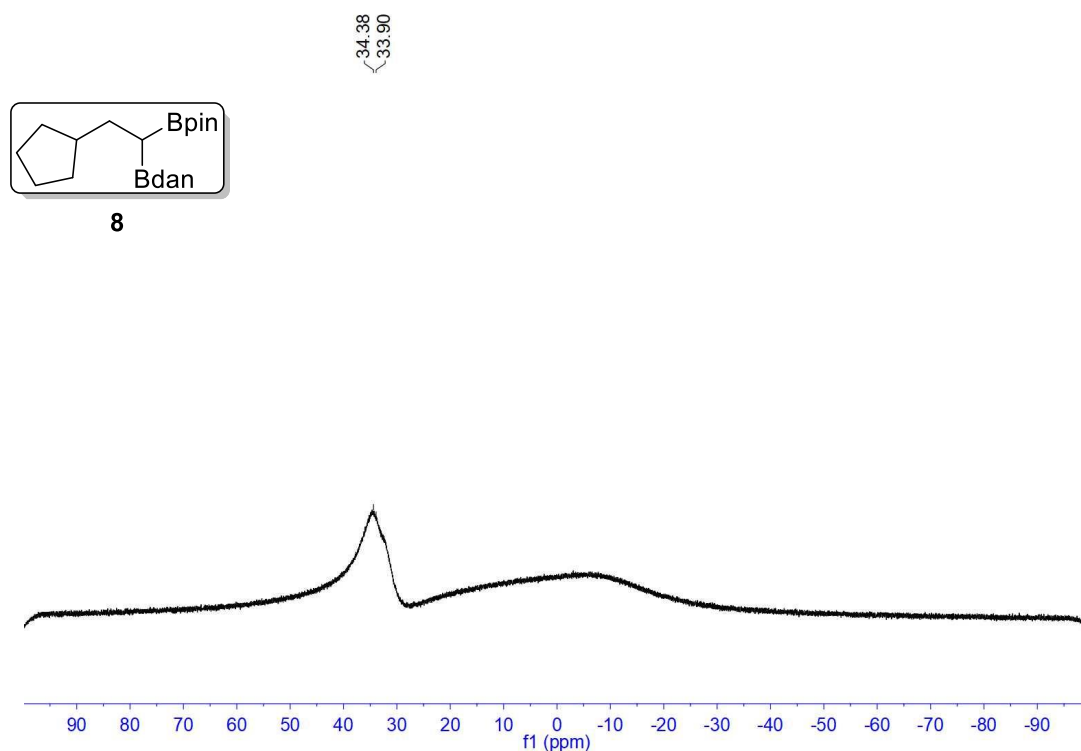

Supplementary Figure 33.  $^{11}\text{B}$  NMR spectrum of compound 8

2-(1-(4,4,5,5-tetramethyl-1,3,2-dioxaborolan-2-yl)pentyl)

-2,3-dihydro-1H-naphtho[1,8-

de][1,3,2]diazaborinine (9)

$^1\text{H}$  NMR (500 MHz, room temperature,  $\text{CDCl}_3$ )

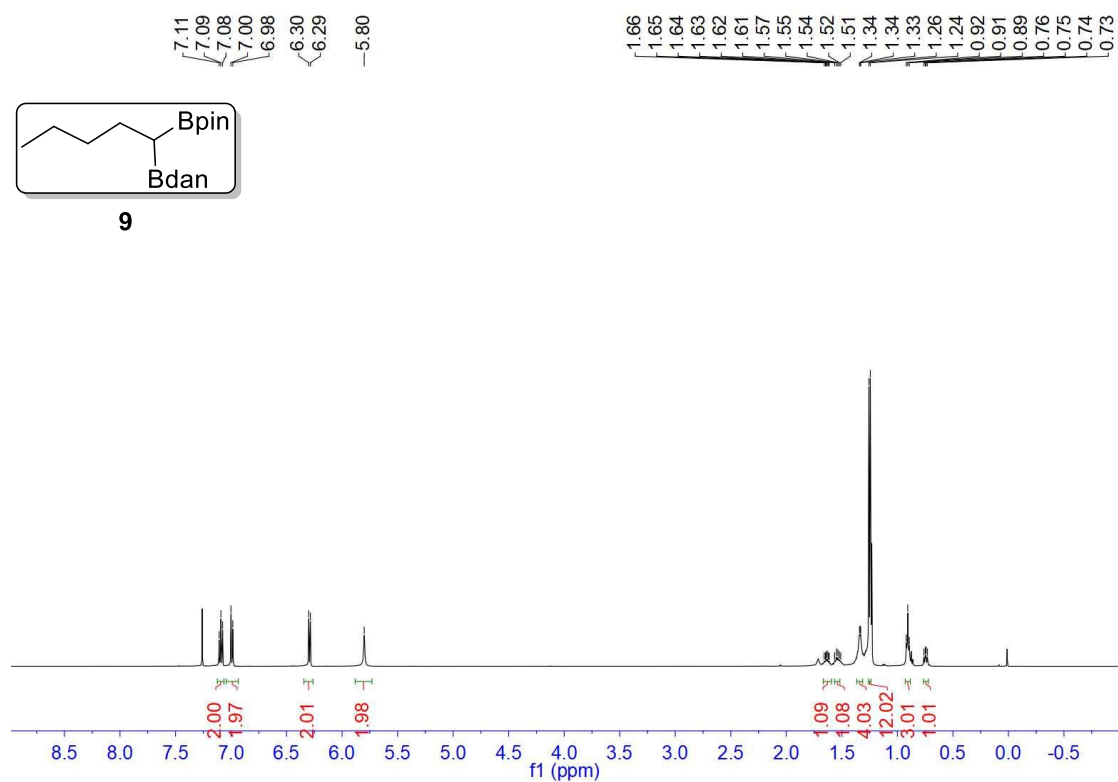

Supplementary Figure 34.  $^1\text{H}$  NMR spectrum of compound 9

$^{13}\text{C}$  NMR (126 MHz, room temperature,  $\text{CDCl}_3$ )

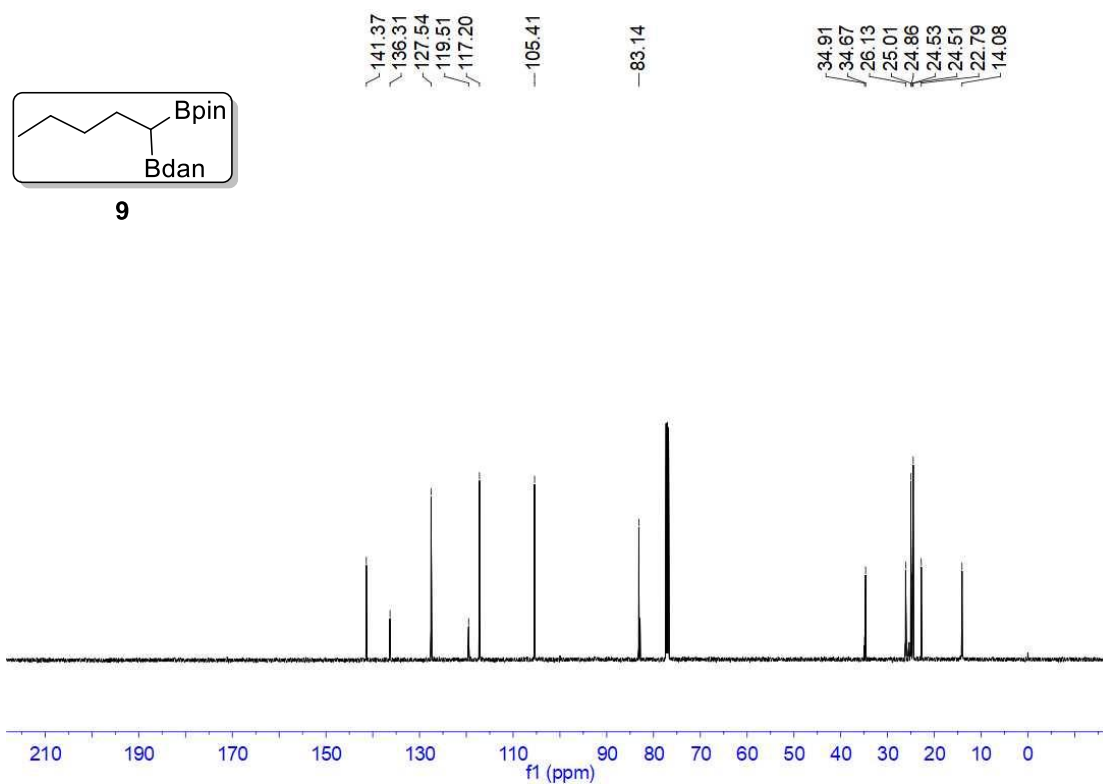

Supplementary Figure 35.  $^{13}\text{C}$  NMR spectrum of compound **9**

$^{11}\text{B}$  NMR (160 MHz, room temperature,  $\text{CDCl}_3$ )

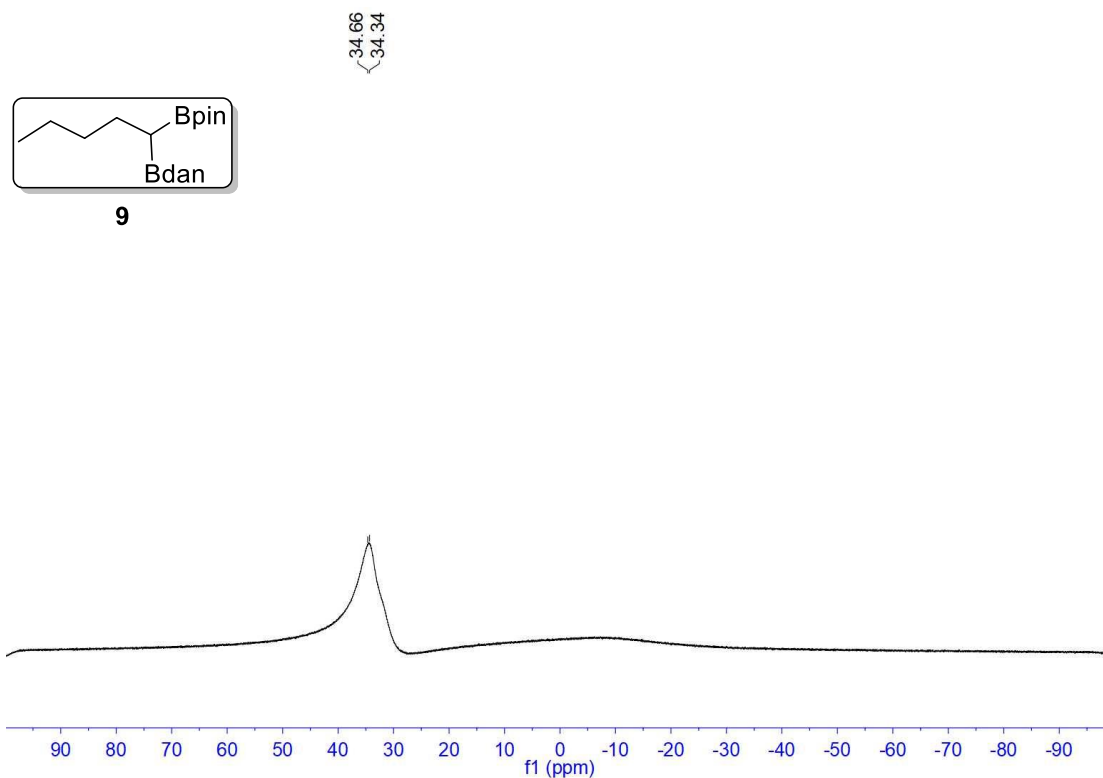

Supplementary Figure 36.  $^{11}\text{B}$  NMR spectrum of compound **9**

2-(1-(4,4,5,5-tetramethyl-1,3,2-dioxaborolan-2-yl)heptyl)-2,3-dihydro-1H-naphtho[1,8-de][1,3,2]diazaborinine (10)

$^1\text{H}$  NMR (500 MHz, room temperature,  $\text{CDCl}_3$ )

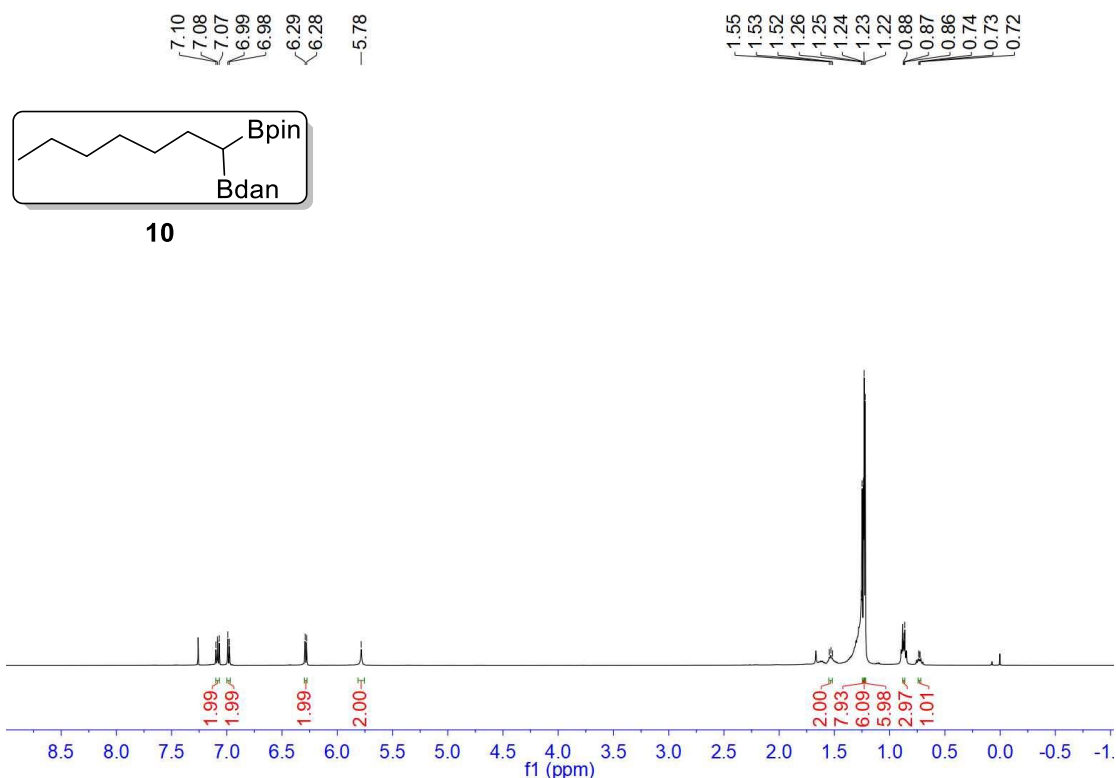

Supplementary Figure 37.  $^1\text{H}$  NMR spectrum of compound 10

$^{13}\text{C}$  NMR (126 MHz, room temperature,  $\text{CDCl}_3$ )

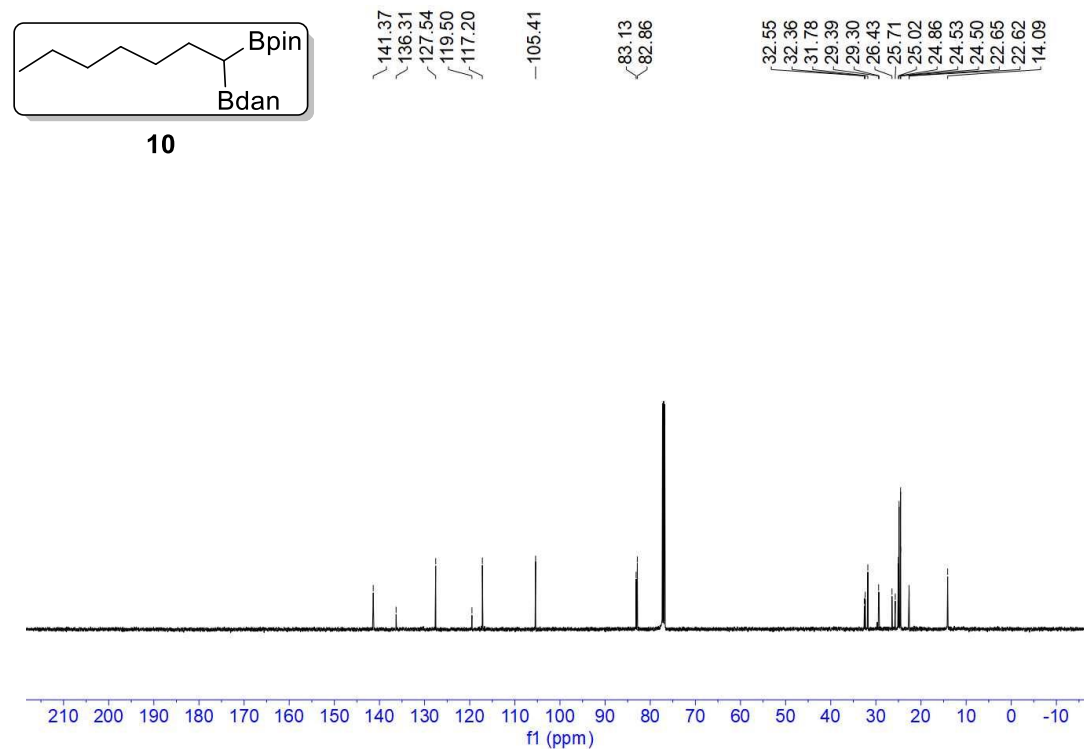

Supplementary Figure 38.  $^{13}\text{C}$  NMR spectrum of compound 10

$^{11}\text{B}$  NMR (160 MHz, room temperature,  $\text{CDCl}_3$ )

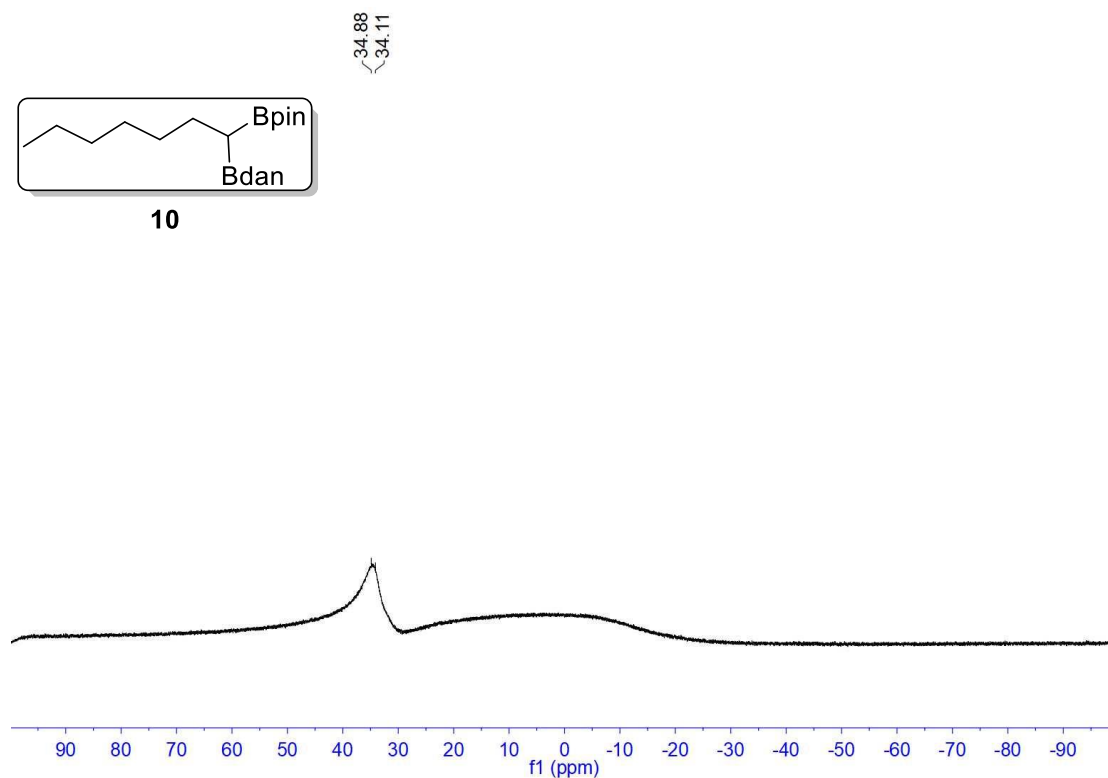

10

Supplementary Figure 39.  $^{11}\text{B}$  NMR spectrum of compound 10

2-(1-(4,4,5,5-tetramethyl-1,3,2-dioxaborolan-2-yl)octyl)

-2,3-dihydro-1H-naphtho[1,8-

de][1,3,2]diazaborinine (11)

$^1\text{H}$  NMR (500 MHz, room temperature,  $\text{CDCl}_3$ )

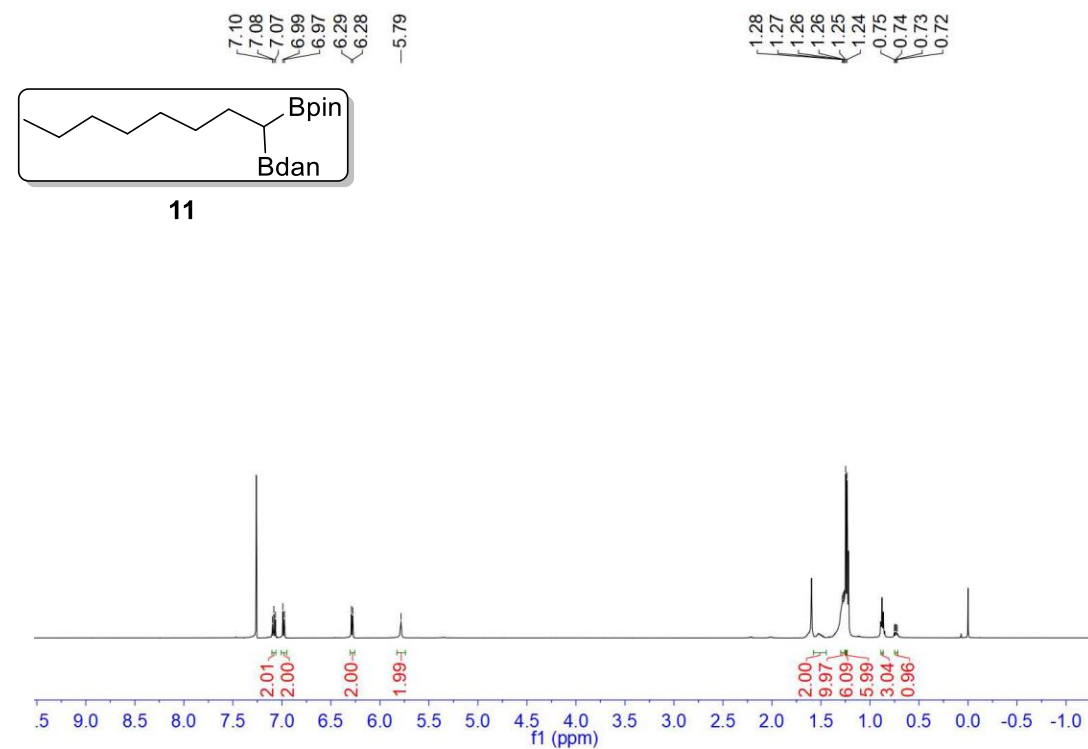

11

Supplementary Figure 40.  $^1\text{H}$  NMR spectrum of compound 11



<sup>13</sup>C NMR (126 MHz, room temperature, CDCl<sub>3</sub>)

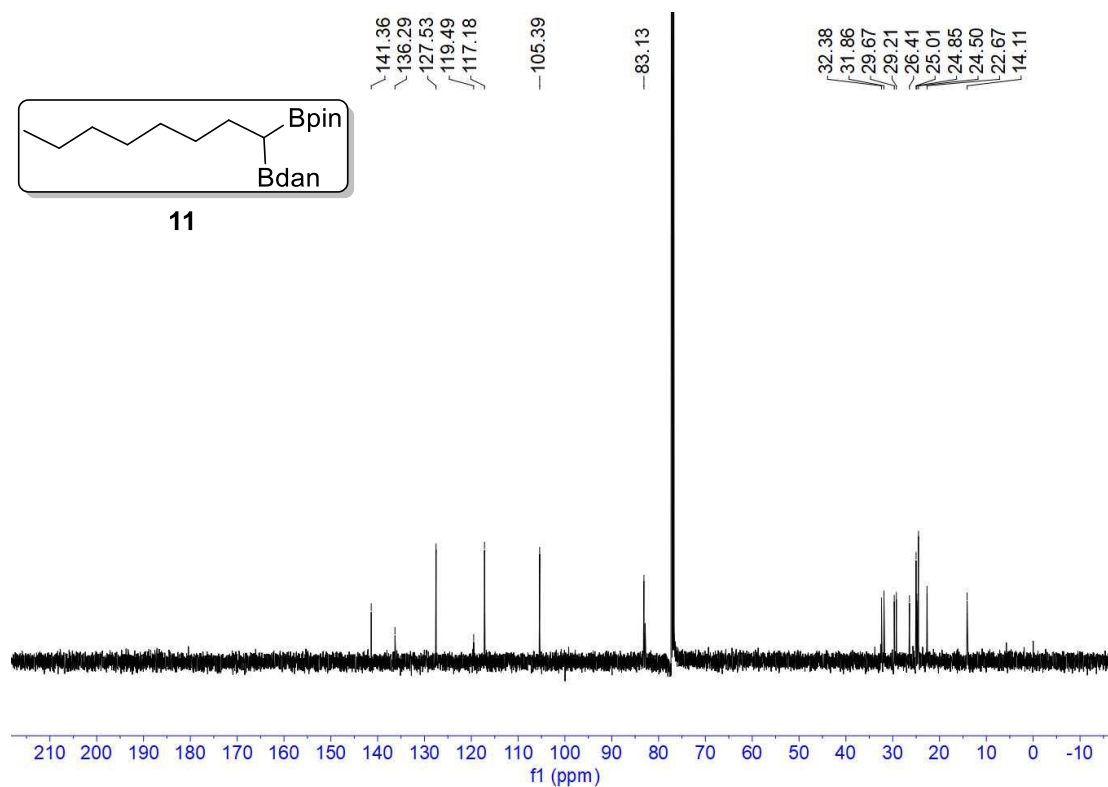

Supplementary Figure 41. <sup>13</sup>C NMR spectrum of compound 11

<sup>11</sup>B NMR (160 MHz, room temperature, CDCl<sub>3</sub>)

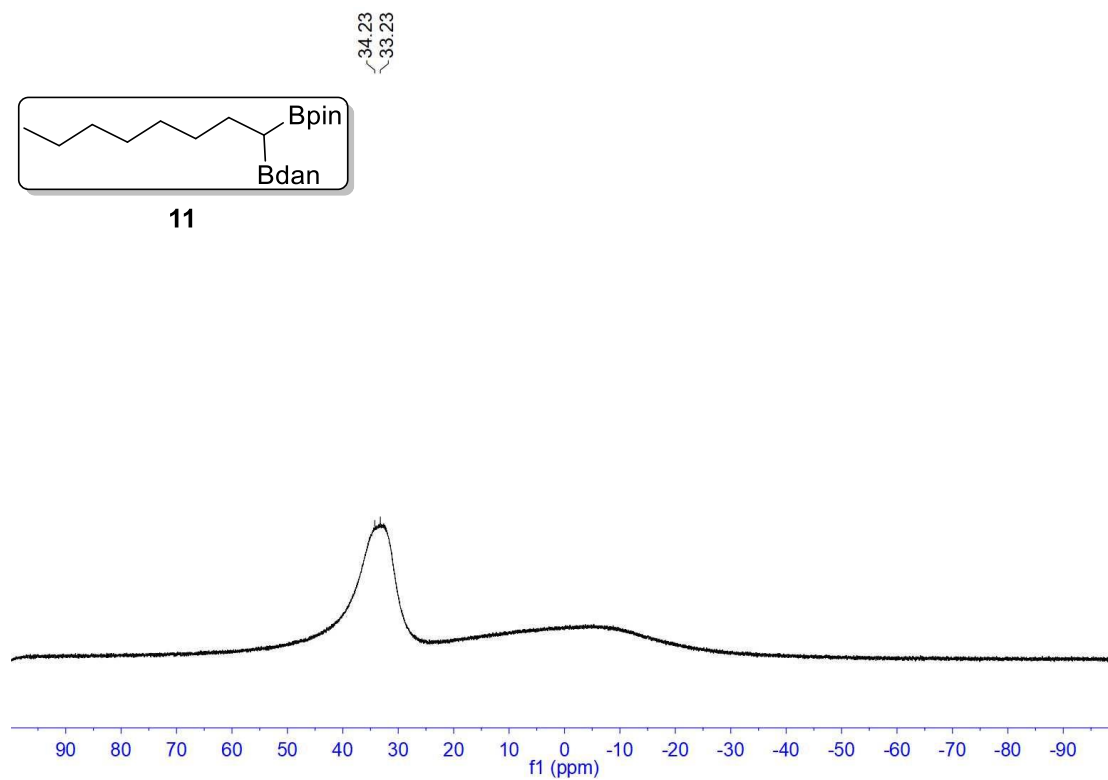

Supplementary Figure 42. <sup>11</sup>B NMR spectrum of compound 11

2-(1-(4,4,5,5-tetramethyl-1,3,2-dioxaborolan-2-yl)octyl)-2,3-dihydro-1H-naphtho[1,8-de][1,3,2]diazaborinine (12)

$^1\text{H}$  NMR (500 MHz, room temperature,  $\text{CDCl}_3$ )

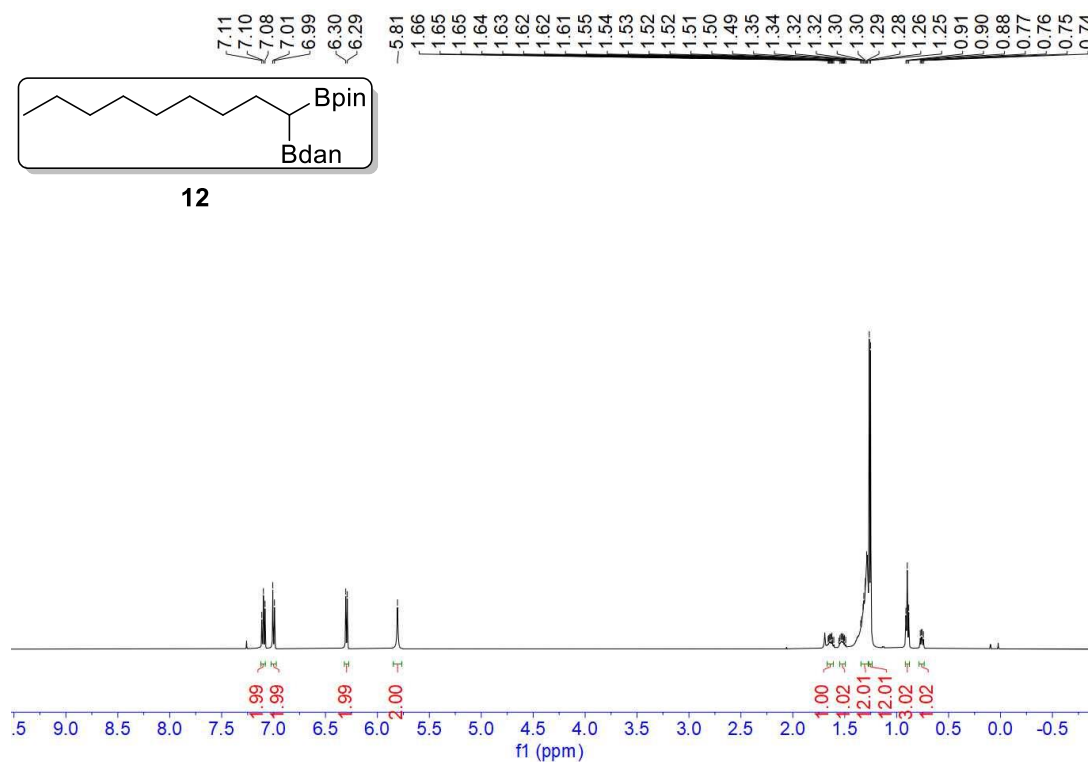

Supplementary Figure 43.  $^1\text{H}$  NMR spectrum of compound 12

$^{13}\text{C}$  NMR (126 MHz, room temperature,  $\text{CDCl}_3$ )

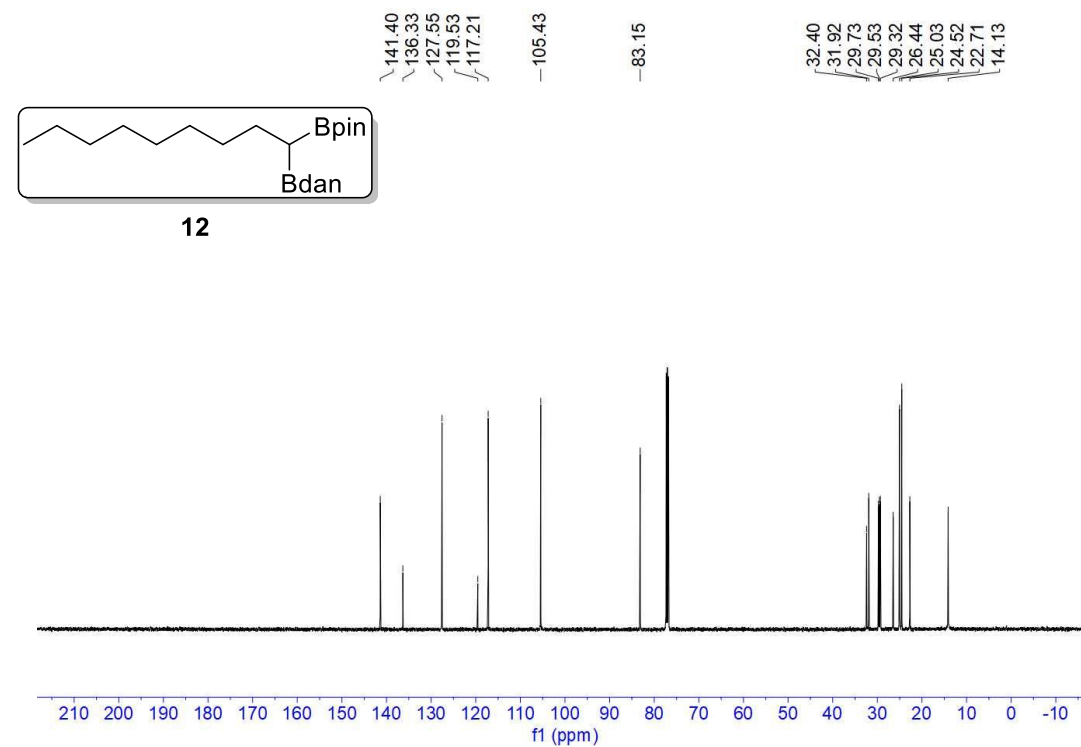

Supplementary Figure 44.  $^{13}\text{C}$  NMR spectrum of compound 12

<sup>11</sup>B NMR (160 MHz, room temperature, CDCl<sub>3</sub>)

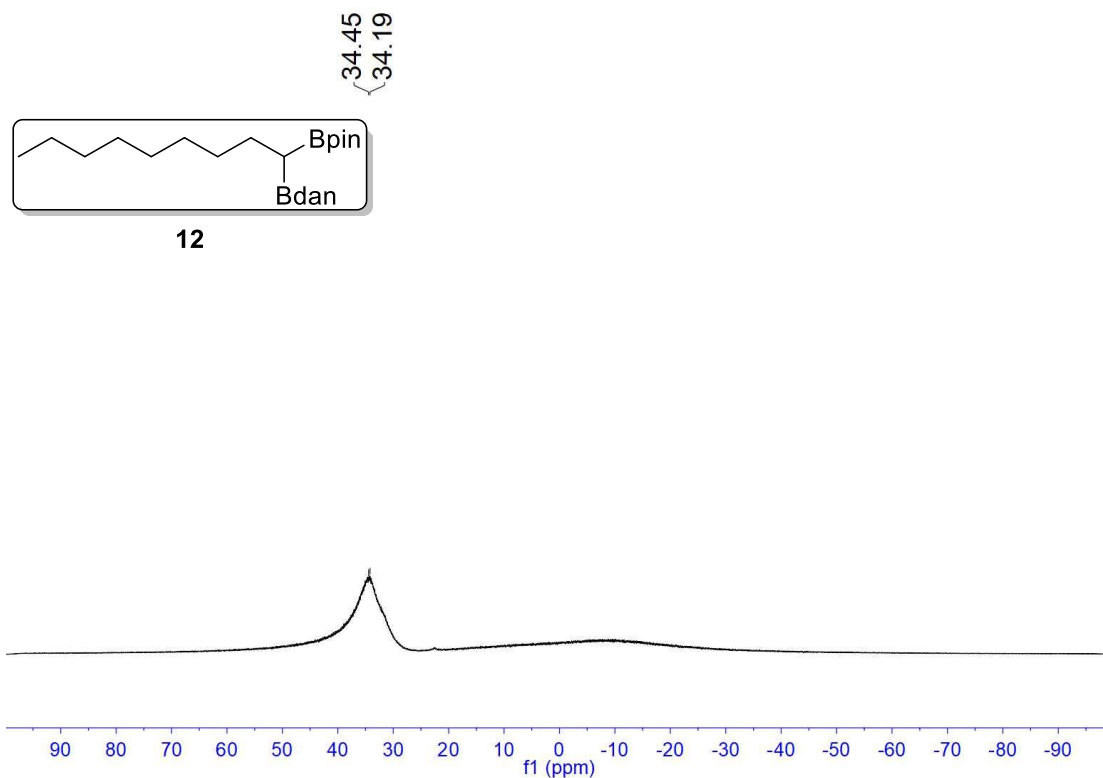

12

Supplementary Figure 45. <sup>11</sup>B NMR spectrum of compound 12

2-(5-methyl-1-(4,4,5,5-tetramethyl-1,3,2-dioxaborolan-2-yl)hexyl)-2,3-dihydro-1H-naphtho[1,8-de][1,3,2]diazaborinine (13)

<sup>1</sup>H NMR (500 MHz, room temperature, CDCl<sub>3</sub>)

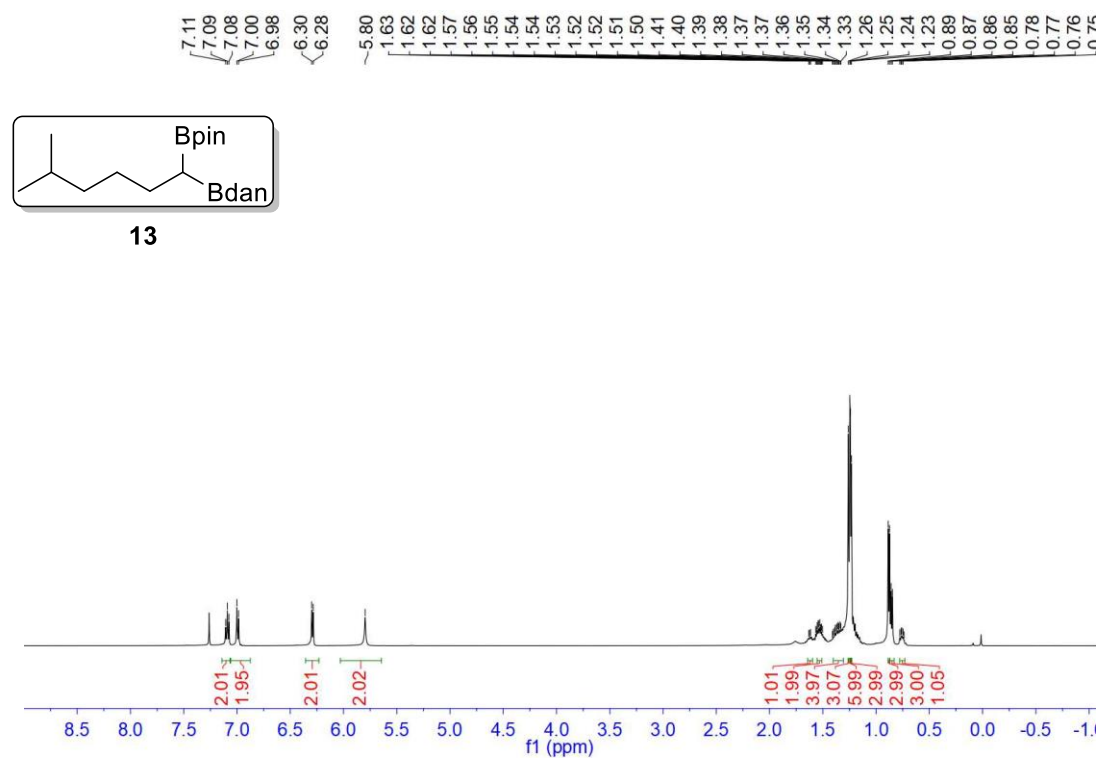

13

Supplementary Figure 46. <sup>1</sup>H NMR spectrum of compound 13

$^{13}\text{C}$  NMR (126 MHz, room temperature,  $\text{CDCl}_3$ )

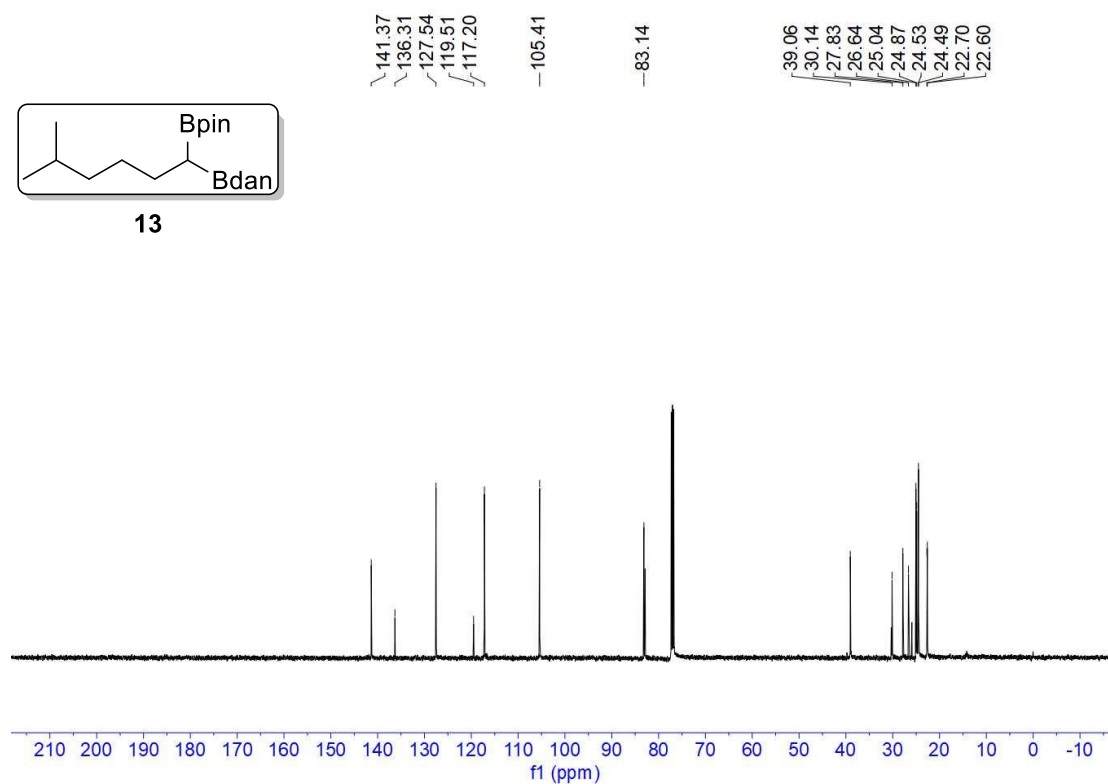

Supplementary Figure 47.  $^{13}\text{C}$  NMR spectrum of compound 13

$^{11}\text{B}$  NMR (160 MHz, room temperature,  $\text{CDCl}_3$ )

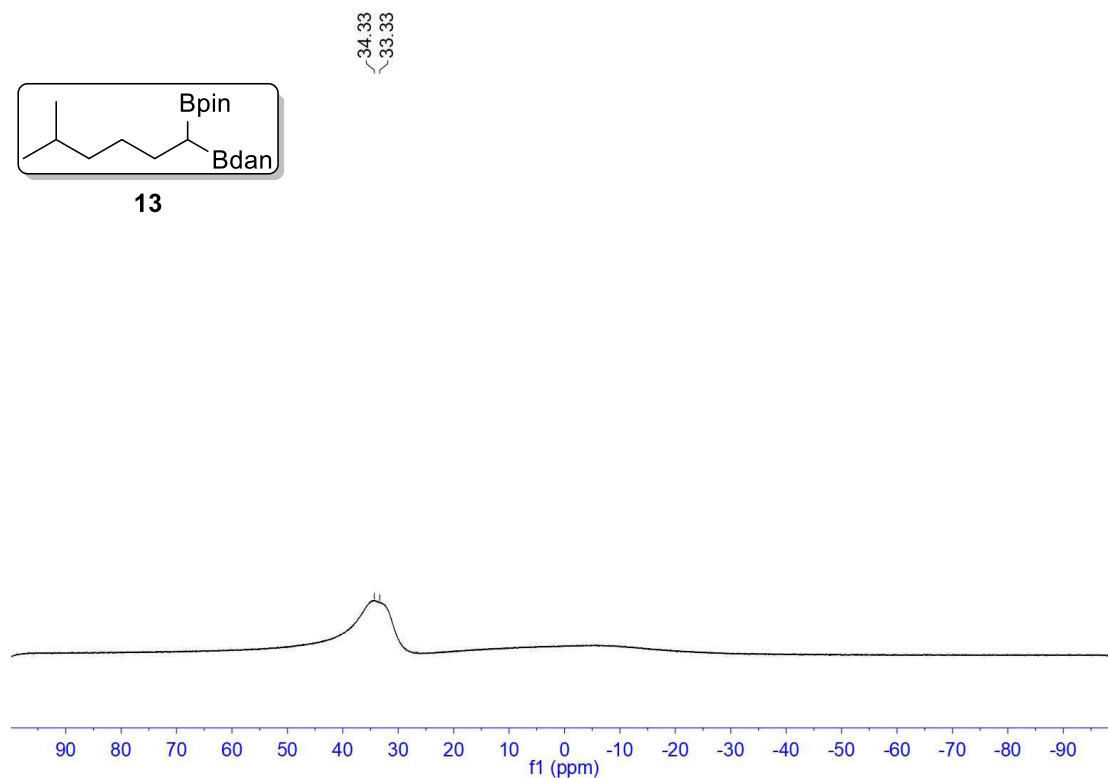

Supplementary Figure 48.  $^{11}\text{B}$  NMR spectrum of compound 13

2-(3,3-dimethyl-1-(4,4,5,5-tetramethyl-1,3,2-dioxaborolan-2-yl)butyl)-2,3-dihydro-1H-naphtho[1,8-de][1,3,2]diazaborinine (14)

<sup>1</sup>H NMR (500 MHz, room temperature, CDCl<sub>3</sub>)

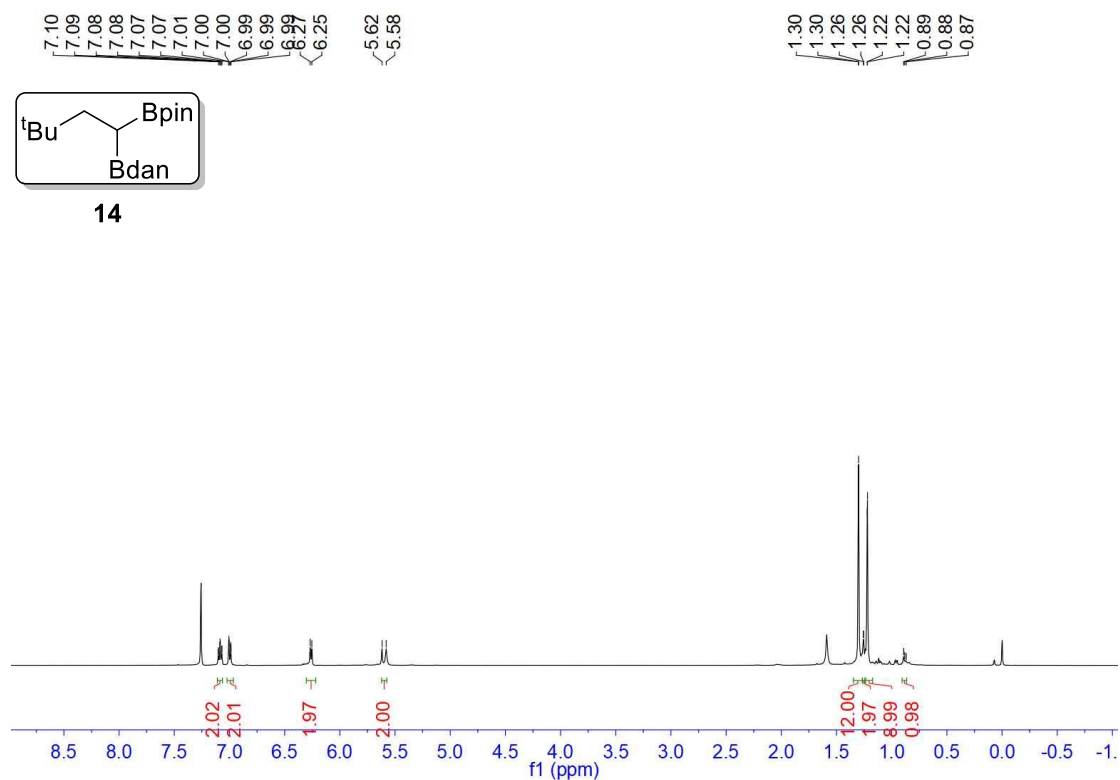

Supplementary Figure 49. <sup>1</sup>H NMR spectrum of compound 14

<sup>13</sup>C NMR (126 MHz, room temperature, CDCl<sub>3</sub>)

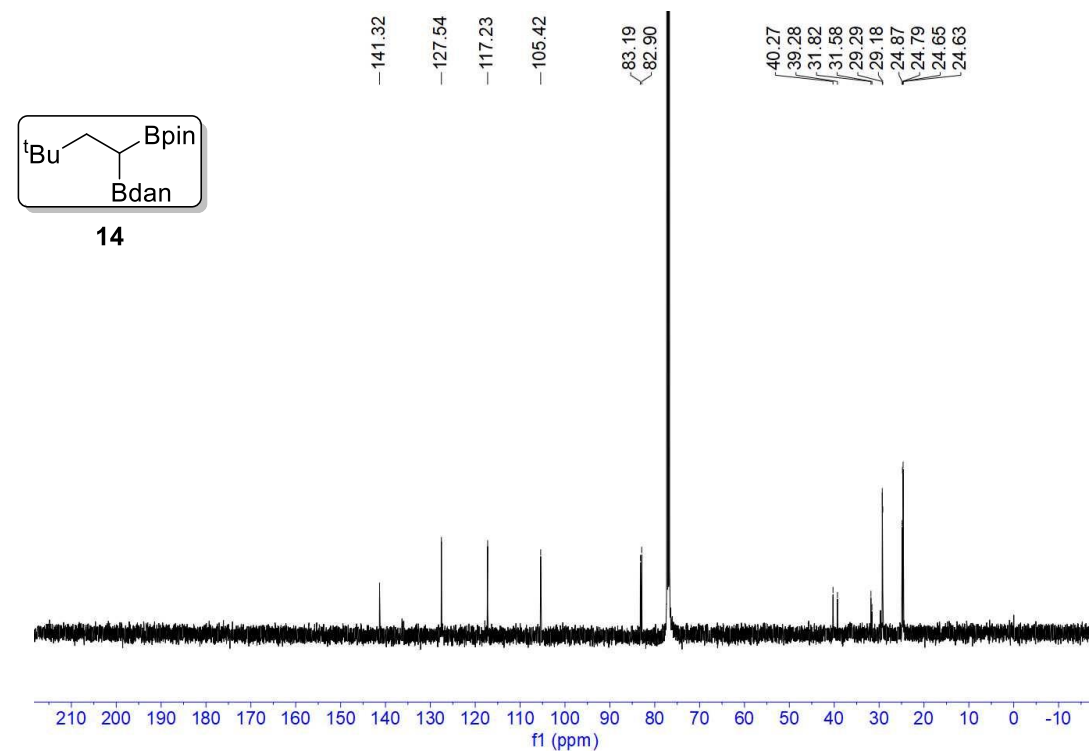

Supplementary Figure 50. <sup>13</sup>C NMR spectrum of compound 14

$^{11}\text{B}$  NMR (160 MHz, room temperature,  $\text{CDCl}_3$ )

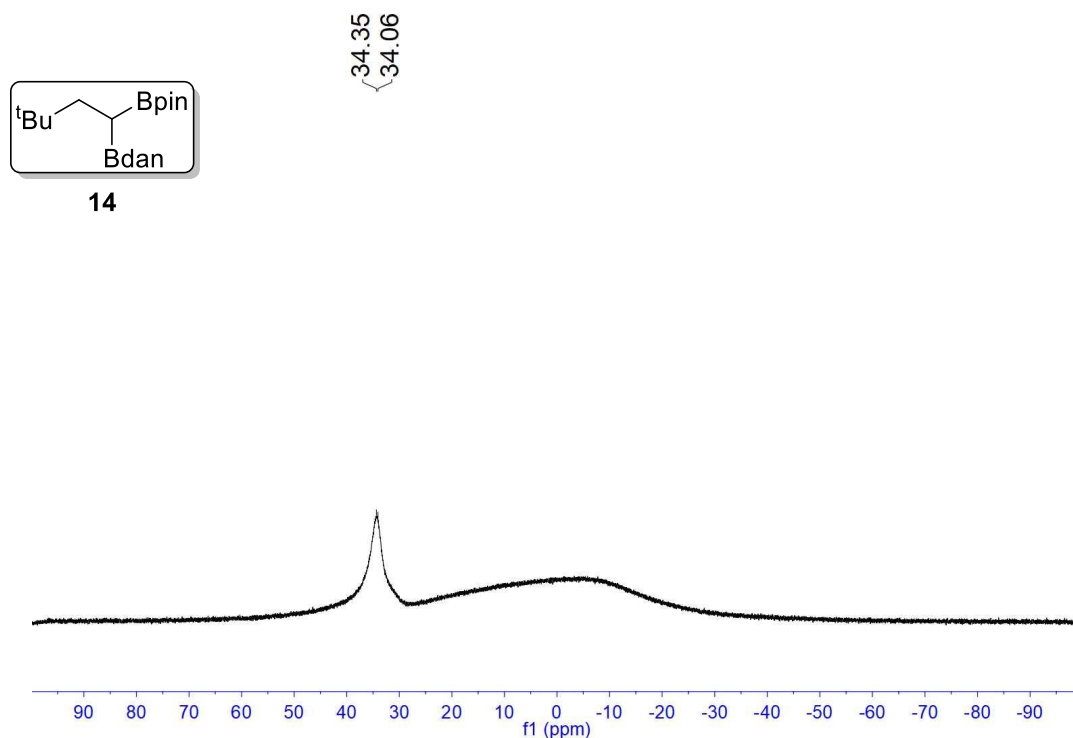

Supplementary Figure 51.  $^{11}\text{B}$  NMR spectrum of compound 14

2-(6-((tert-butyldimethylsilyloxy)-1-(4,4,5,5-tetramethyl-1,3,2-dioxaborolan-2-yl)hexyl)-2,3-dihydro-1H-naphtho[1,8-de][1,3,2]diazaborinine (15)

$^1\text{H}$  NMR (500 MHz, room temperature,  $\text{CDCl}_3$ )

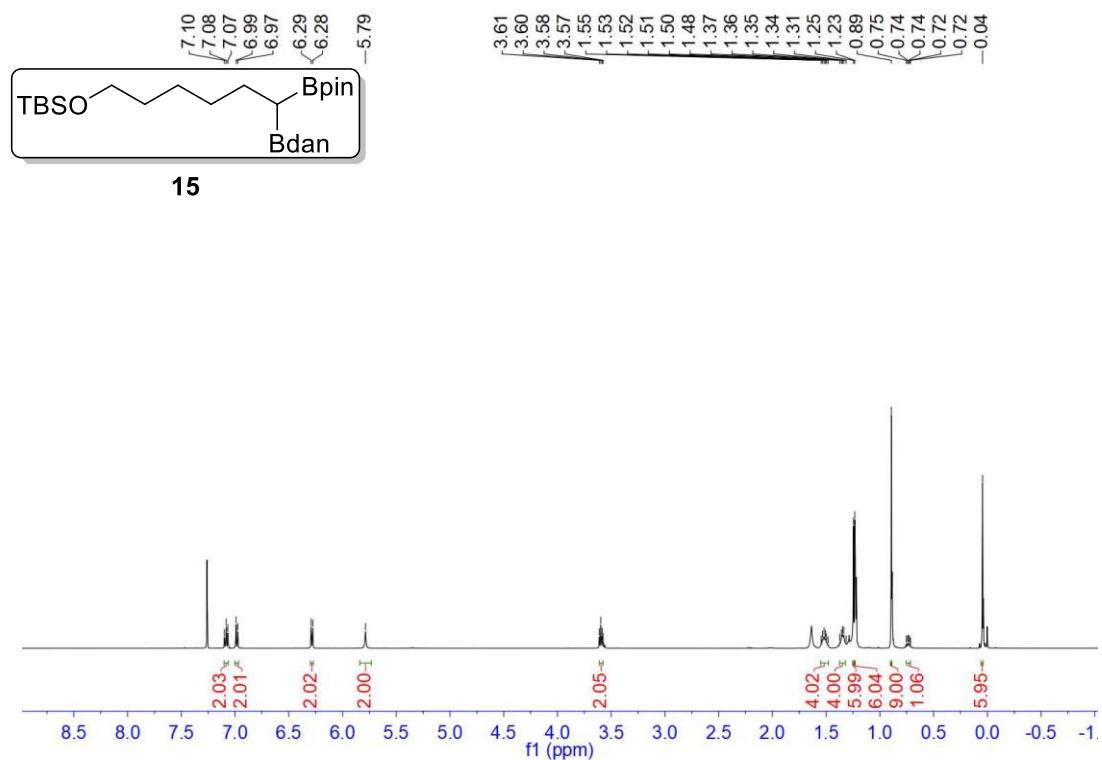

Supplementary Figure 52.  $^1\text{H}$  NMR spectrum of compound 15

$^{13}\text{C}$  NMR (126 MHz, room temperature,  $\text{CDCl}_3$ )

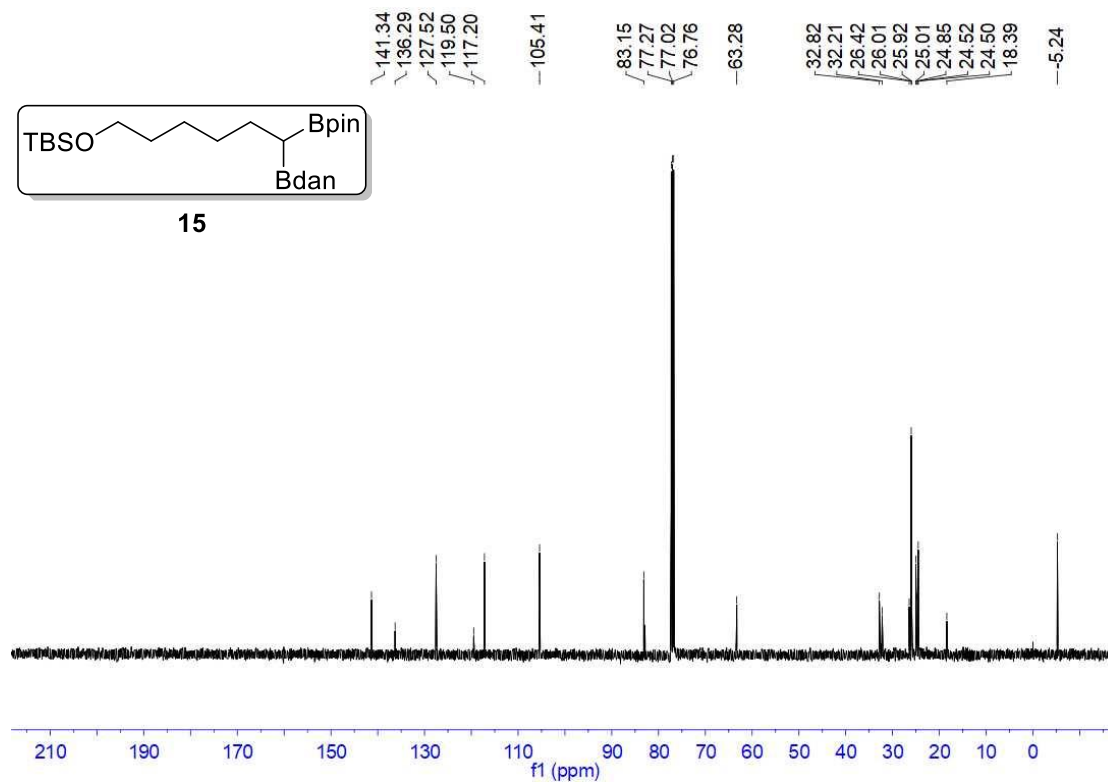

Supplementary Figure 53.  $^{13}\text{C}$  NMR spectrum of compound 15

$^{11}\text{B}$  NMR (160 MHz, room temperature,  $\text{CDCl}_3$ )

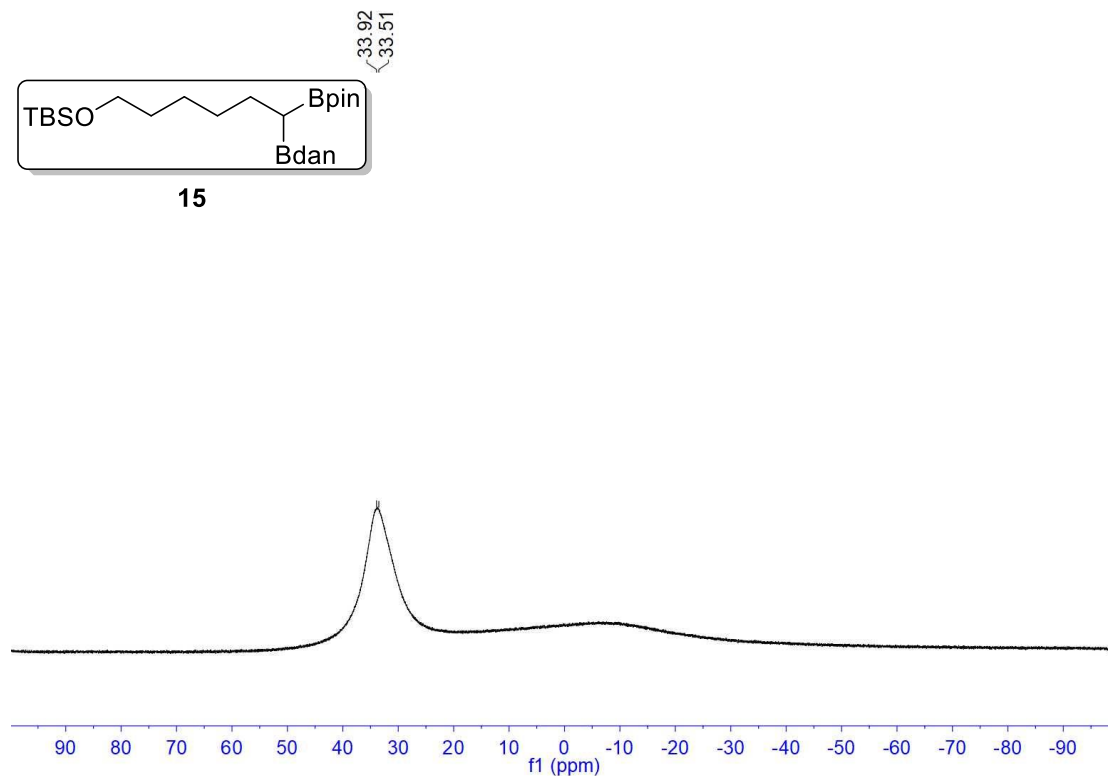

Supplementary Figure 54.  $^{11}\text{B}$  NMR spectrum of compound 15

2-(4-((tert-butyldimethylsilyloxy)-1-(4,4,5,5-tetramethyl-1,3,2-dioxaborolan-2-yl)butyl)-2,3-dihydro-1H-naphtho[1,8-de][1,3,2]diazaborinine (16)

<sup>1</sup>H NMR (500 MHz, room temperature, CDCl<sub>3</sub>)

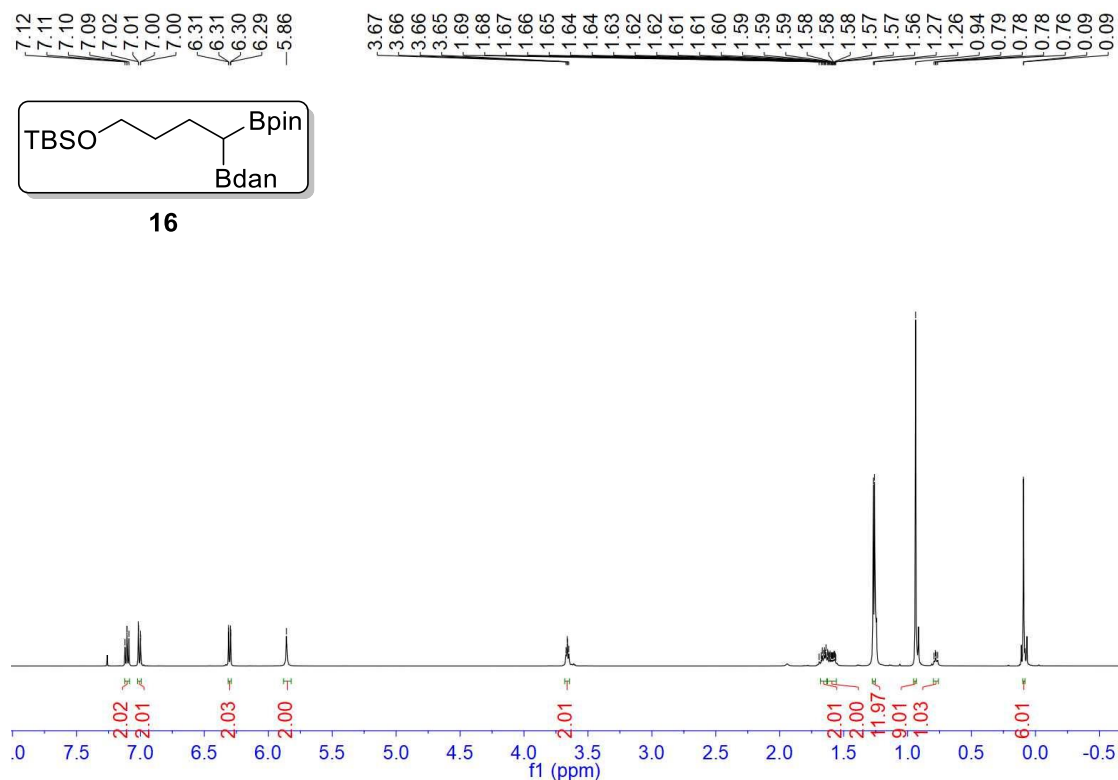

Supplementary Figure 55. <sup>1</sup>H NMR spectrum of compound 16

<sup>13</sup>C NMR (126 MHz, room temperature, CDCl<sub>3</sub>)

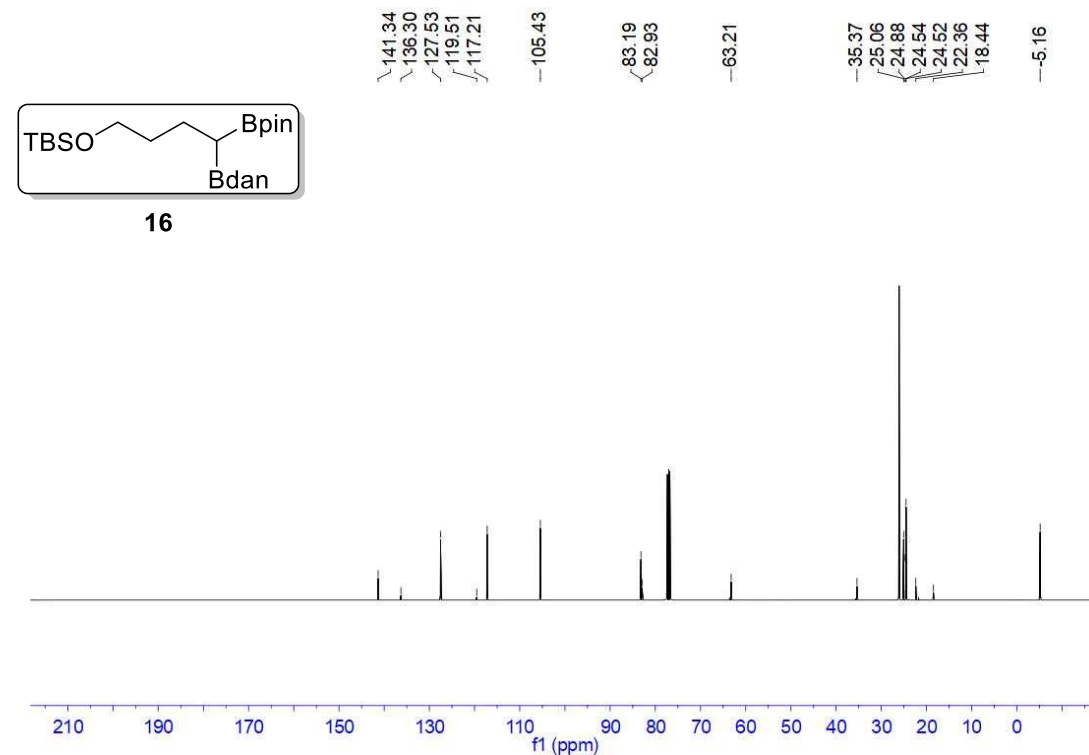

Supplementary Figure 56. <sup>13</sup>C NMR spectrum of compound 16



<sup>11</sup>B NMR (160 MHz, room temperature, CDCl<sub>3</sub>)

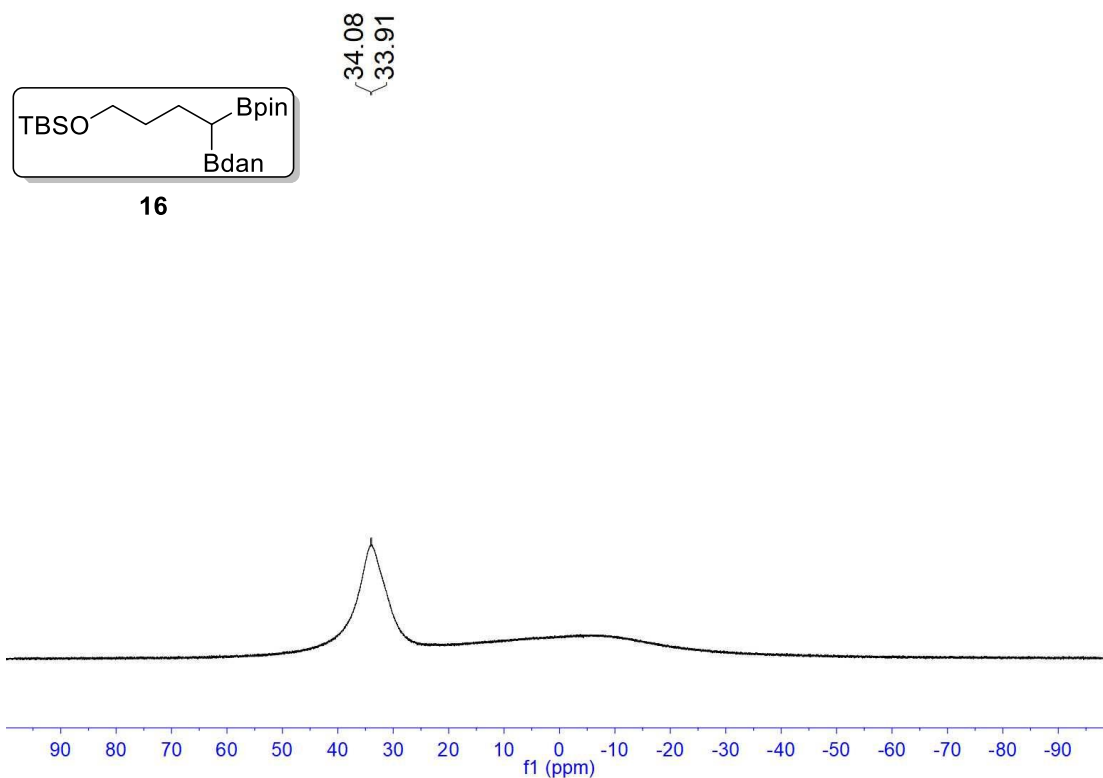

16

Supplementary Figure 57. <sup>11</sup>B NMR spectrum of compound 16

tert-butyl 4-(2-(1H-naphtho[1,8-de] [1,3,2] diazaborinin-2(3H)-yl) -2-(4,4,5,5-tetramethyl-1,3,2-dioxaborolan-2-yl) ethyl) piperidine-1-carboxylate (17)

<sup>1</sup>H NMR (500 MHz, room temperature, CDCl<sub>3</sub>)

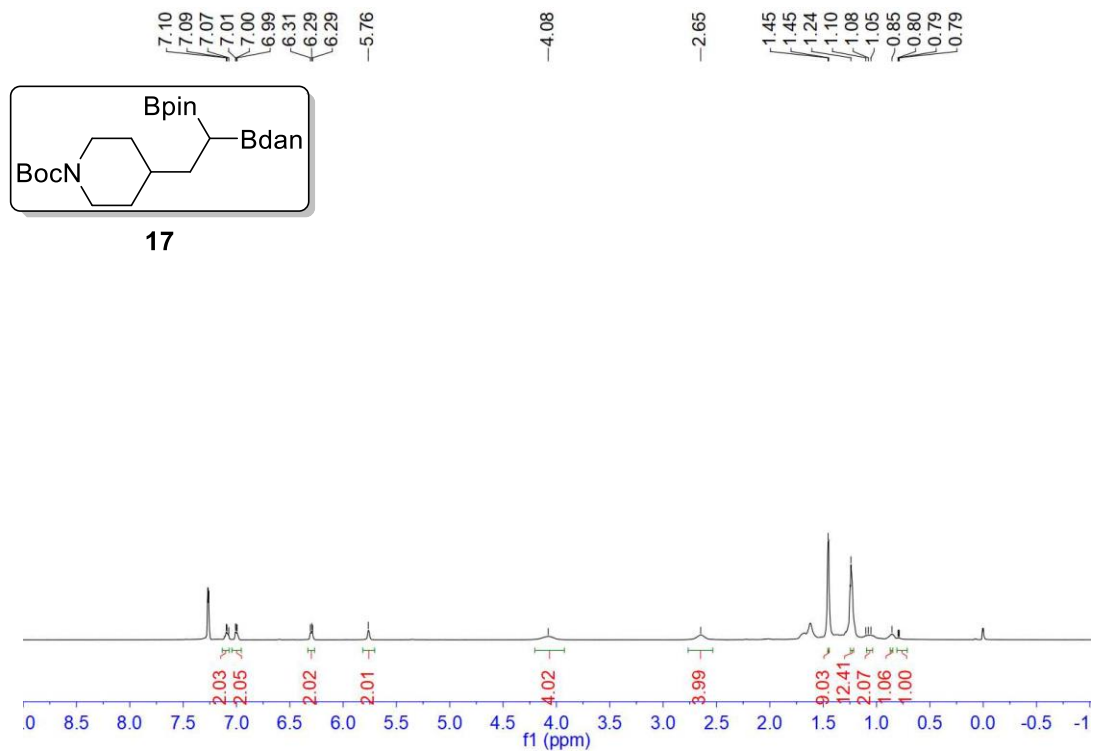

17

Supplementary Figure 58. <sup>1</sup>H NMR spectrum of compound 17

**$^{13}\text{C}$  NMR (126 MHz, room temperature,  $\text{CDCl}_3$ )**

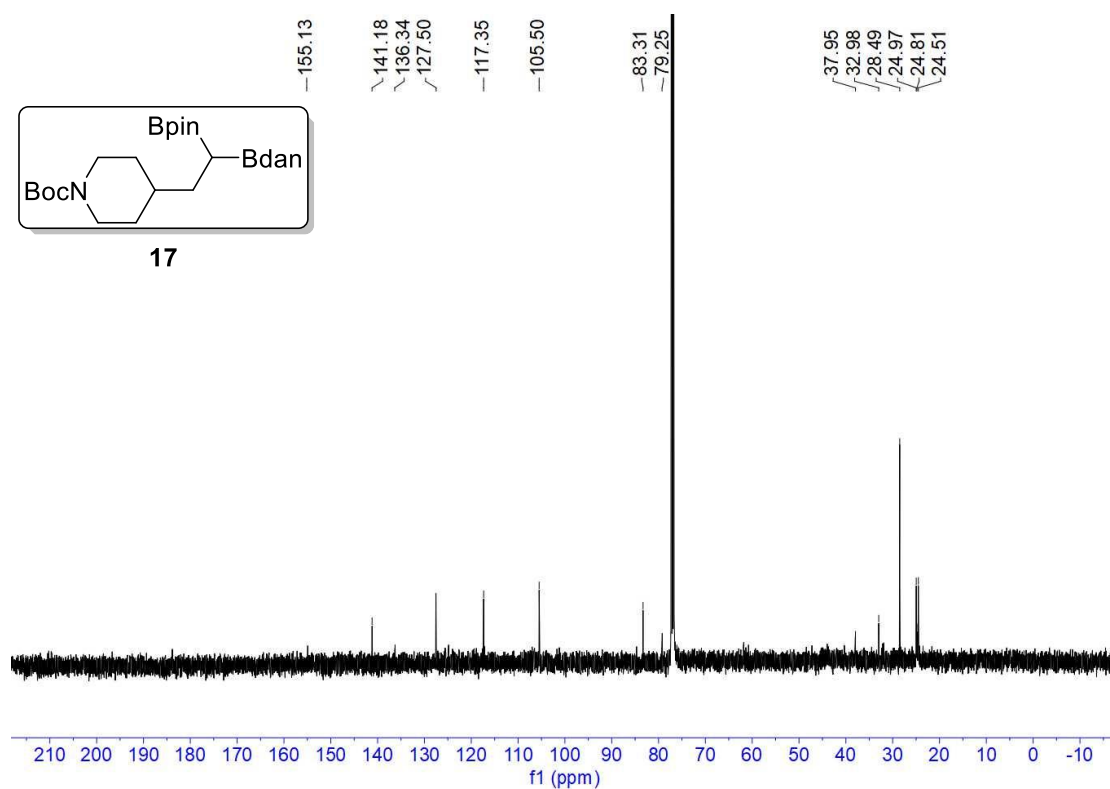

Supplementary Figure 59.  $^{13}\text{C}$  NMR spectrum of compound 17

**$^{11}\text{B}$  NMR (160 MHz, room temperature,  $\text{CDCl}_3$ )**

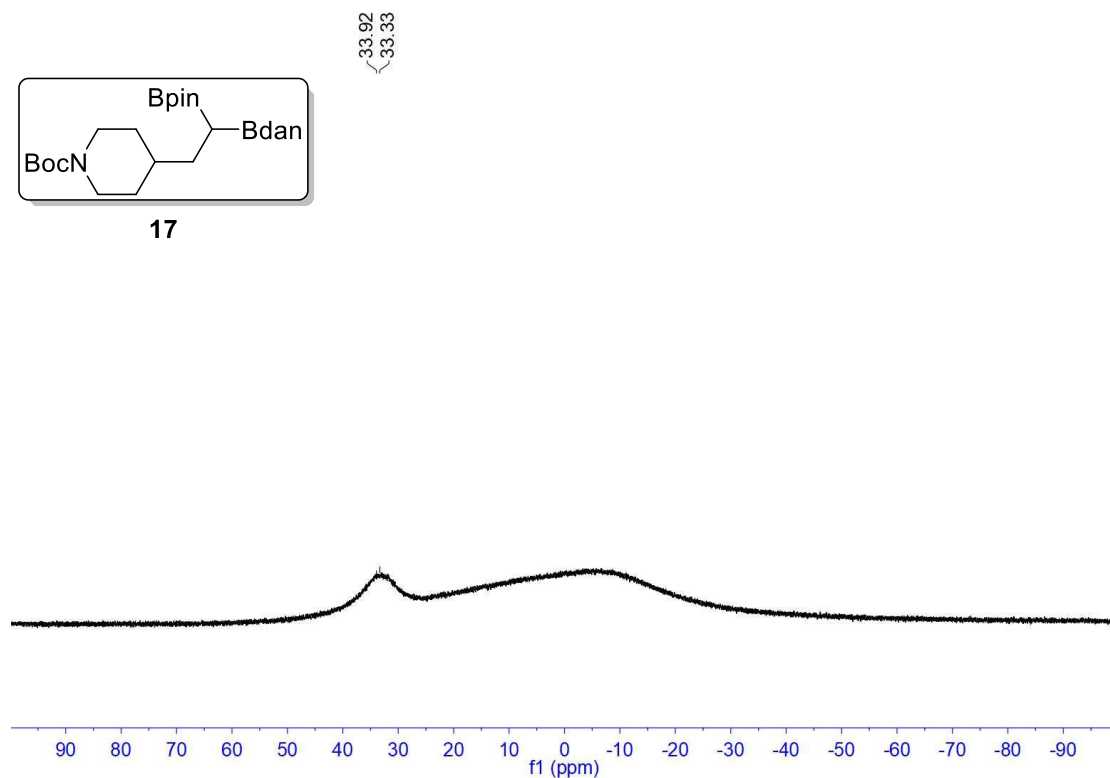

Supplementary Figure 60.  $^{11}\text{B}$  NMR spectrum of compound 17

2-(2-(cyclohex-1-en-1-yl)-1-(4,4,5,5-tetramethyl-1,3,2-dioxaborolan-2-yl)ethyl)-2,3-dihydro-1H-naphtho[1,8-de][1,3,2]diazaborinine (18)

<sup>1</sup>H NMR (500 MHz, room temperature, CDCl<sub>3</sub>)

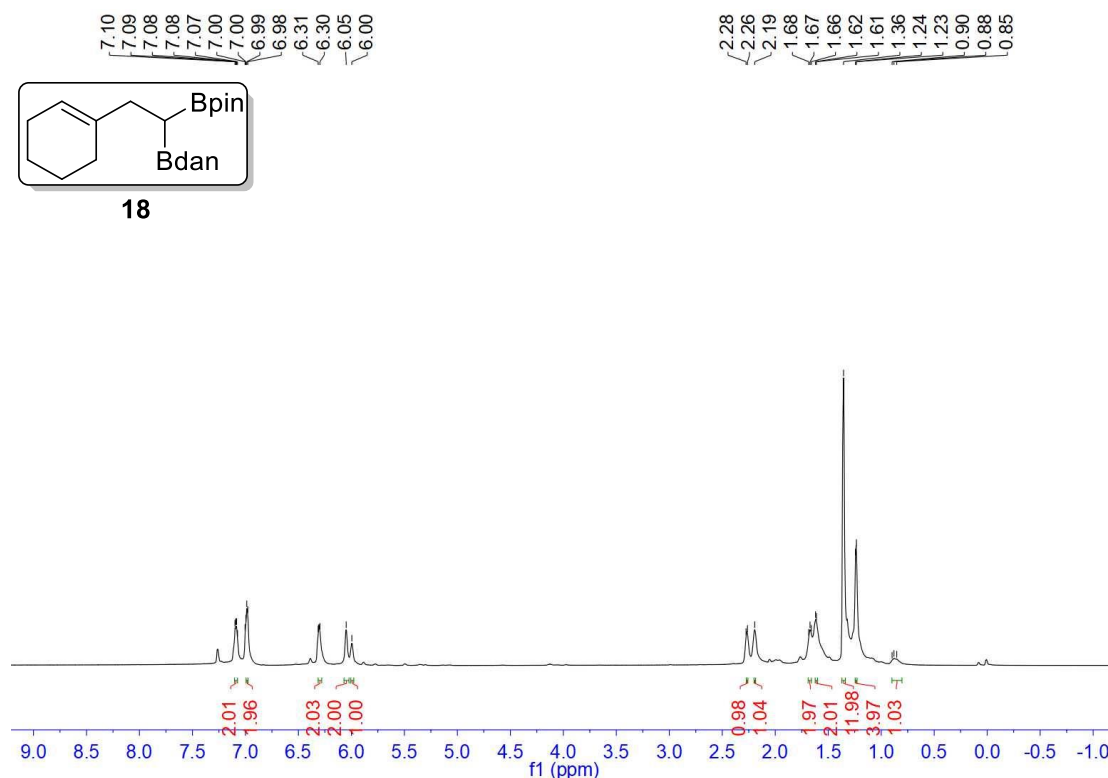

Supplementary Figure 61. <sup>1</sup>H NMR spectrum of compound 18

<sup>13</sup>C NMR (126 MHz, room temperature, CDCl<sub>3</sub>)

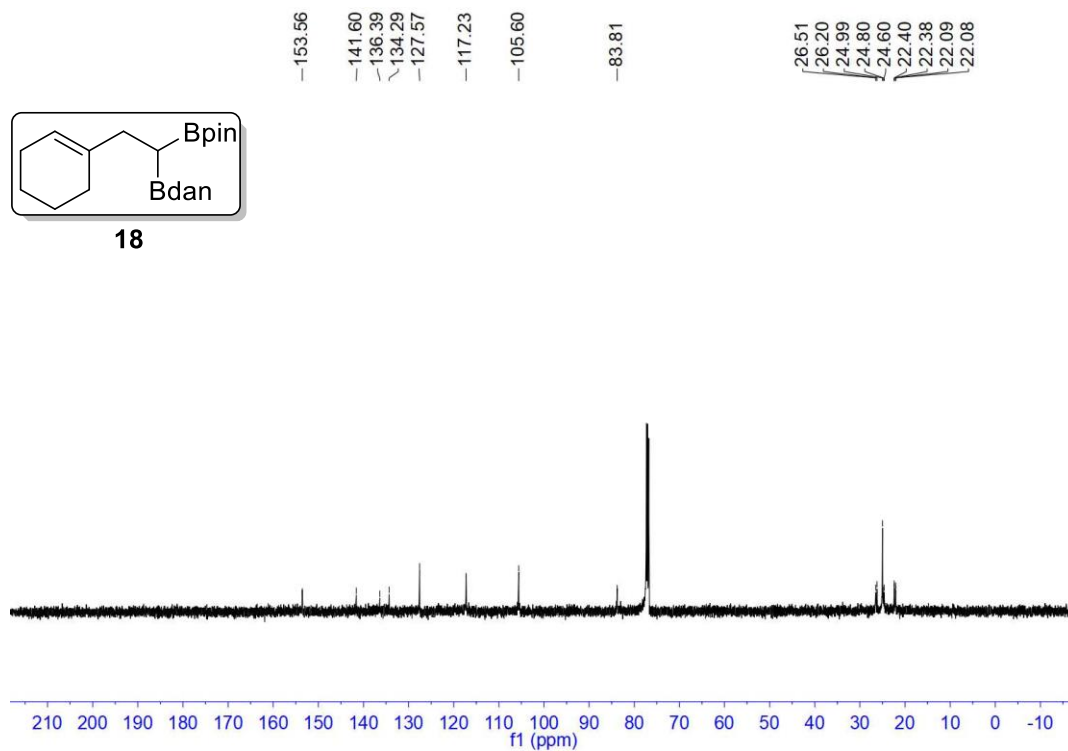

Supplementary Figure 62. <sup>13</sup>C NMR spectrum of compound 18

**<sup>11</sup>B NMR (160 MHz, room temperature, CDCl<sub>3</sub>)**

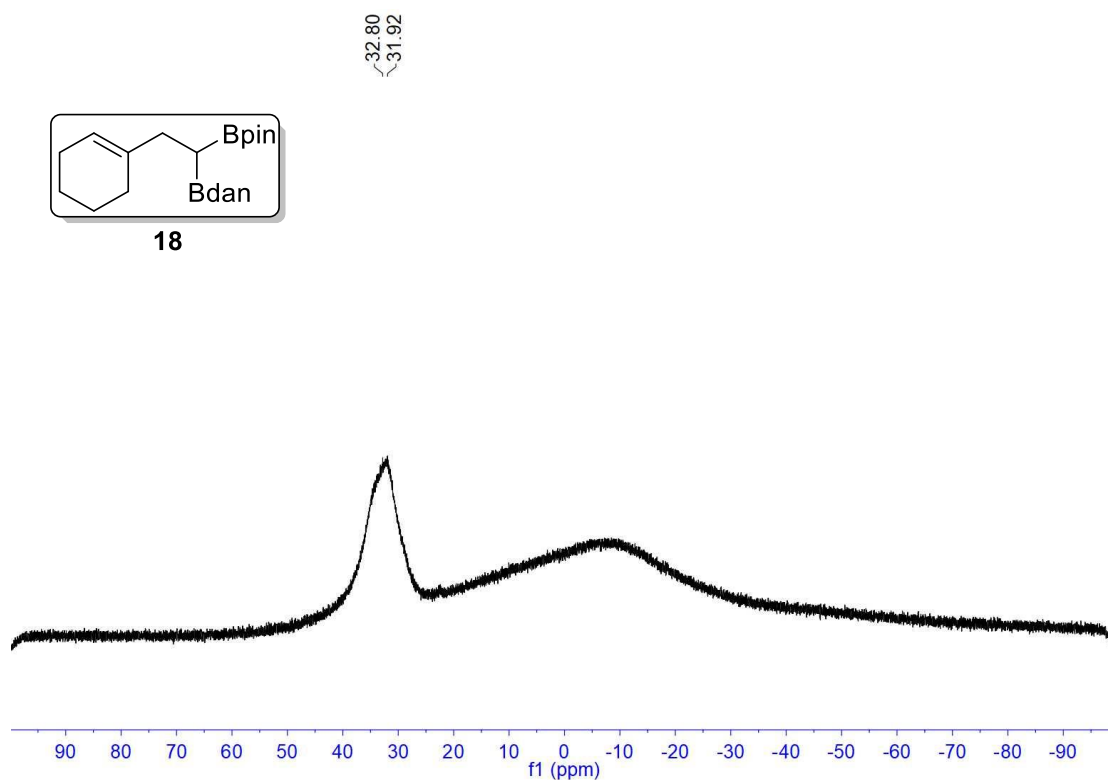

Supplementary Figure 63. <sup>11</sup>B NMR spectrum of compound 18

**5-(1H-naphtho[1,8-de][1,3,2]diazaborinin-2(3H)-yl) -5-(4,4,5,5-tetramethyl-1,3,2-dioxaborolan-2-yl)pentyl propionate (19)**

**<sup>1</sup>H NMR (500 MHz, room temperature, CDCl<sub>3</sub>)**

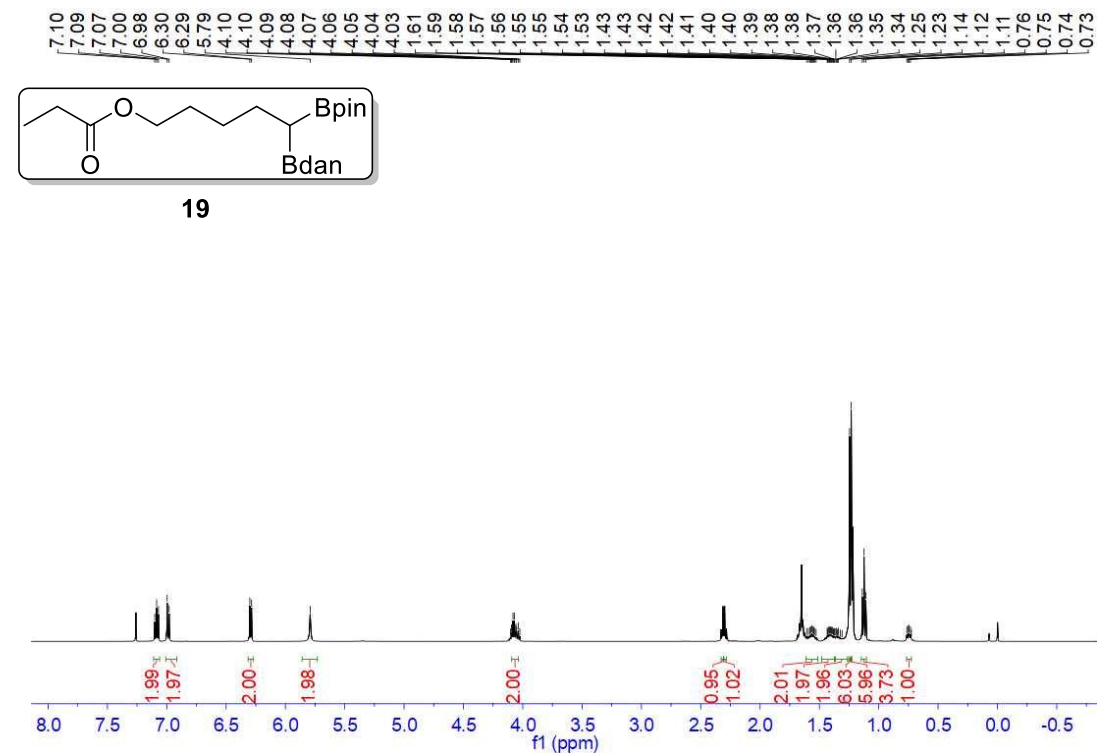

Supplementary Figure 64. <sup>1</sup>H NMR spectrum of compound 19

**$^{13}\text{C}$  NMR (126 MHz, room temperature,  $\text{CDCl}_3$ )**

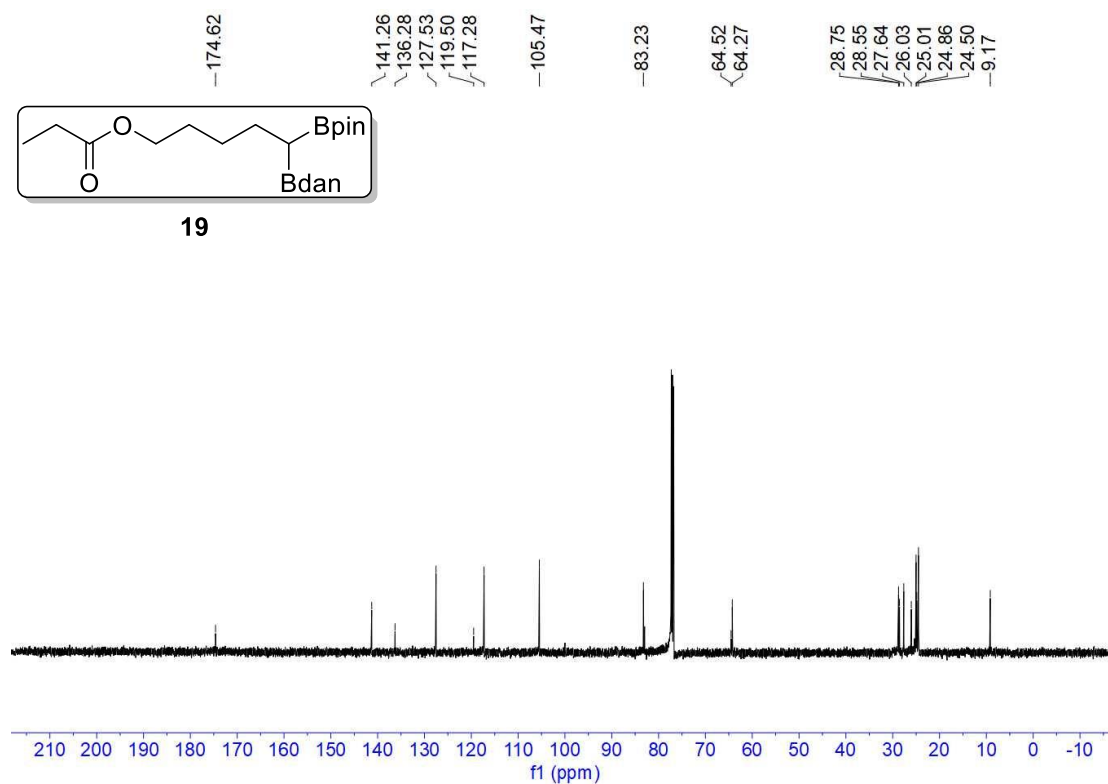

Supplementary Figure 65.  $^{13}\text{C}$  NMR spectrum of compound 19

**$^{11}\text{B}$  NMR (160 MHz, room temperature,  $\text{CDCl}_3$ )**

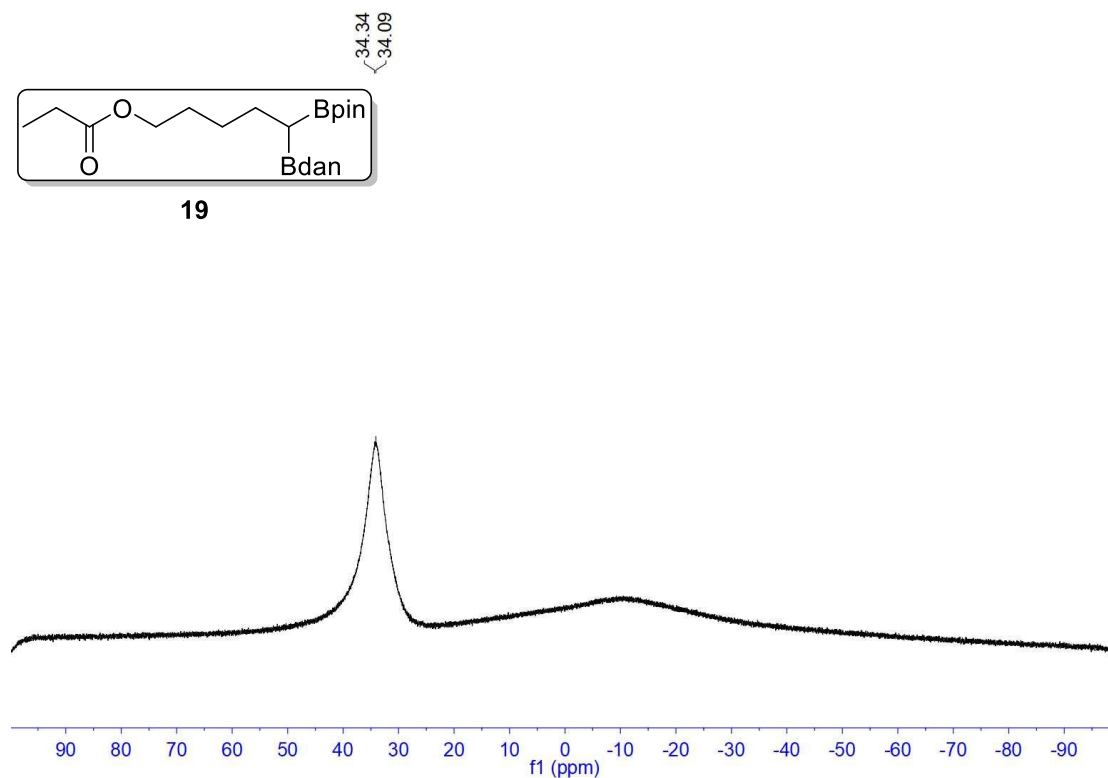

Supplementary Figure 66.  $^{11}\text{B}$  NMR spectrum of compound 19

2-(4-((tetrahydro-2H-pyran-2-yl)oxy) -1-(4,4,5,5-tetramethyl-1,3,2-dioxaborolan-2-yl)butyl)-2,3-dihydro-1H-naphtho[1,8-de][1,3,2]diazaborinine (20)

<sup>1</sup>H NMR (500 MHz, room temperature, CDCl<sub>3</sub>)

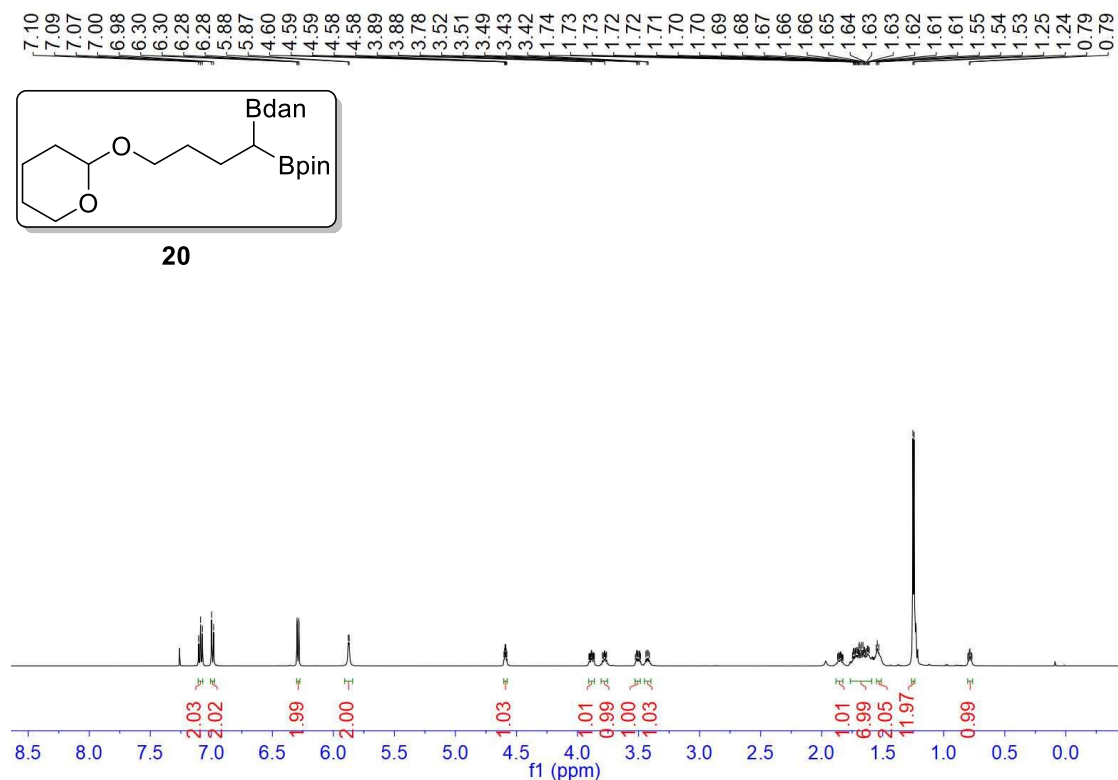

Supplementary Figure 67. <sup>1</sup>H NMR spectrum of compound 20

<sup>13</sup>C NMR (126 MHz, room temperature, CDCl<sub>3</sub>)

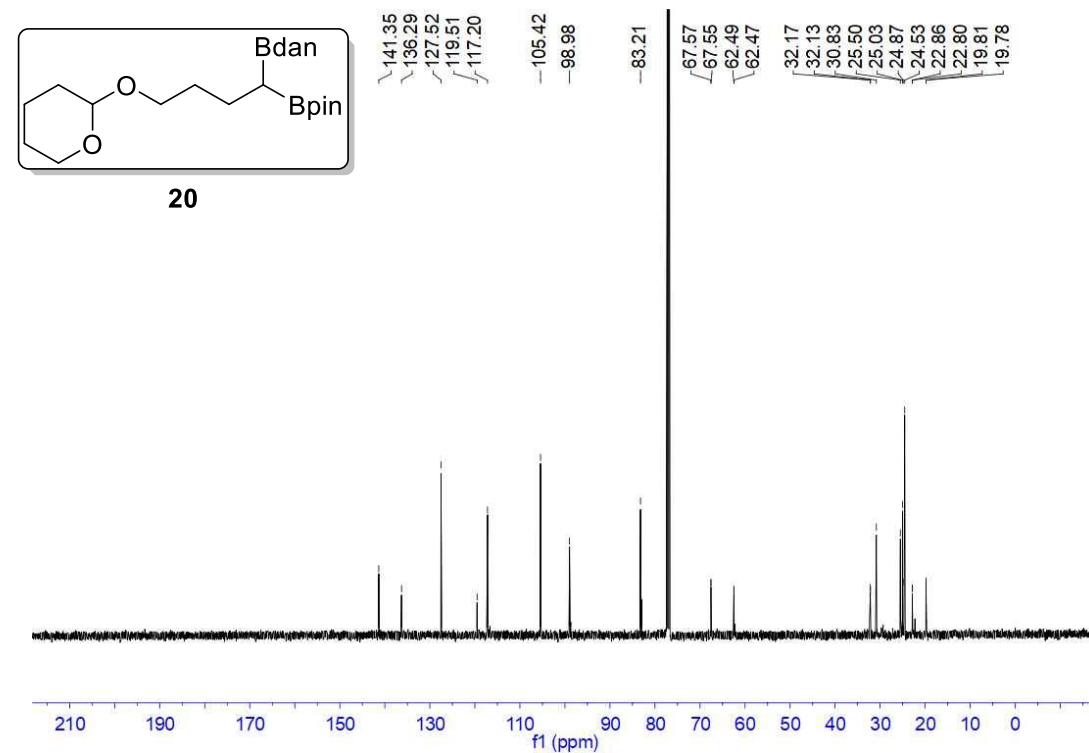

Supplementary Figure 68. <sup>13</sup>C NMR spectrum of compound 20

<sup>11</sup>B NMR (160 MHz, room temperature, CDCl<sub>3</sub>)

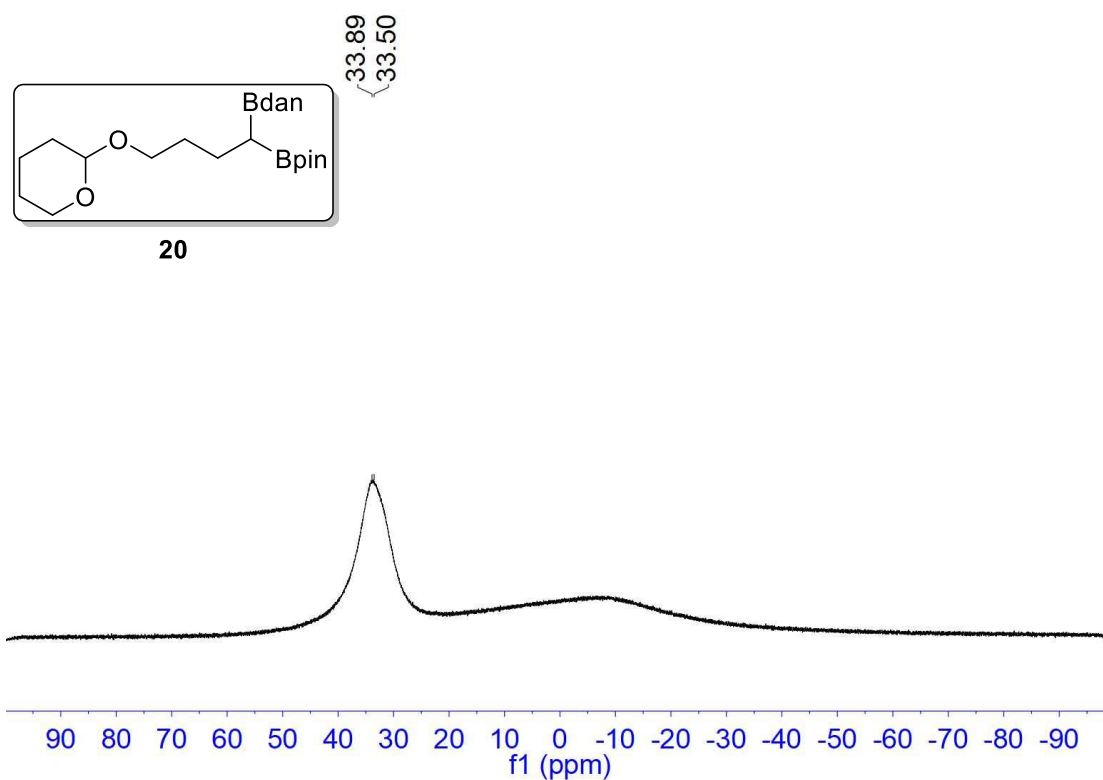

20

Supplementary Figure 69. <sup>11</sup>B NMR spectrum of compound 20

2-(3,3-diethoxy-1-(4,4,5,5-tetramethyl-1,3,2-dioxaborolan-2-yl)propyl)-2,3-dihydro-1H-naphtho[1,8-de][1,3,2]diazaborinine (21)

<sup>1</sup>H NMR (500 MHz, room temperature, CDCl<sub>3</sub>)

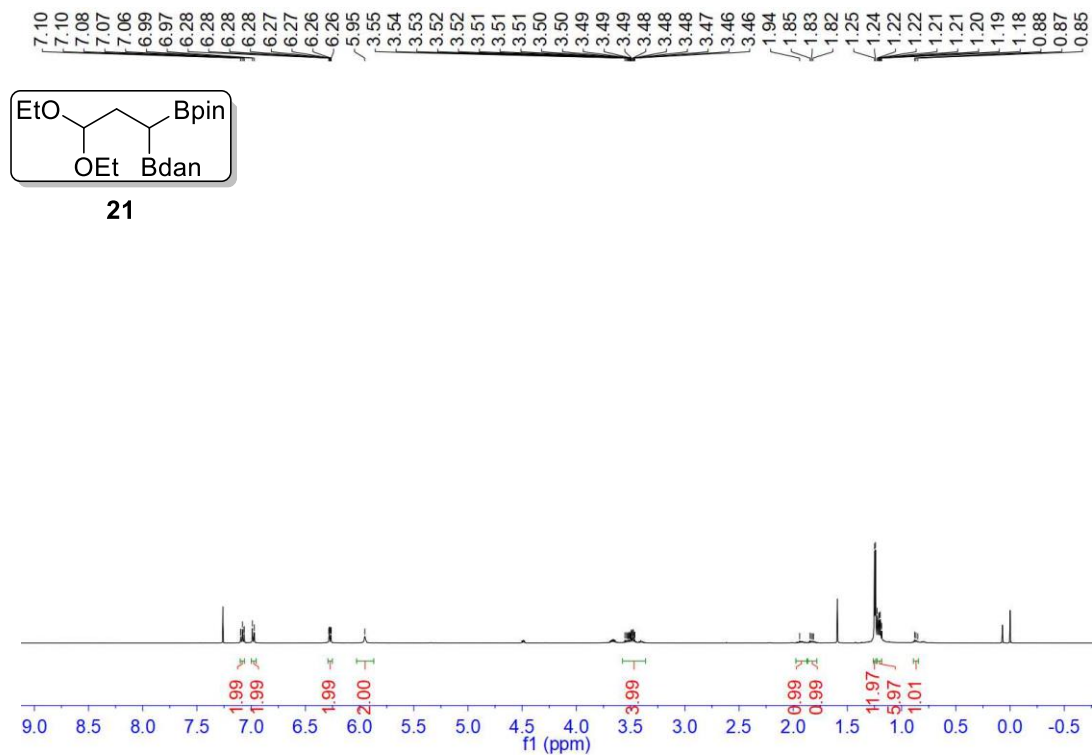

21

Supplementary Figure 70. <sup>1</sup>H NMR spectrum of compound 21

<sup>13</sup>C NMR (126 MHz, room temperature, CDCl<sub>3</sub>)

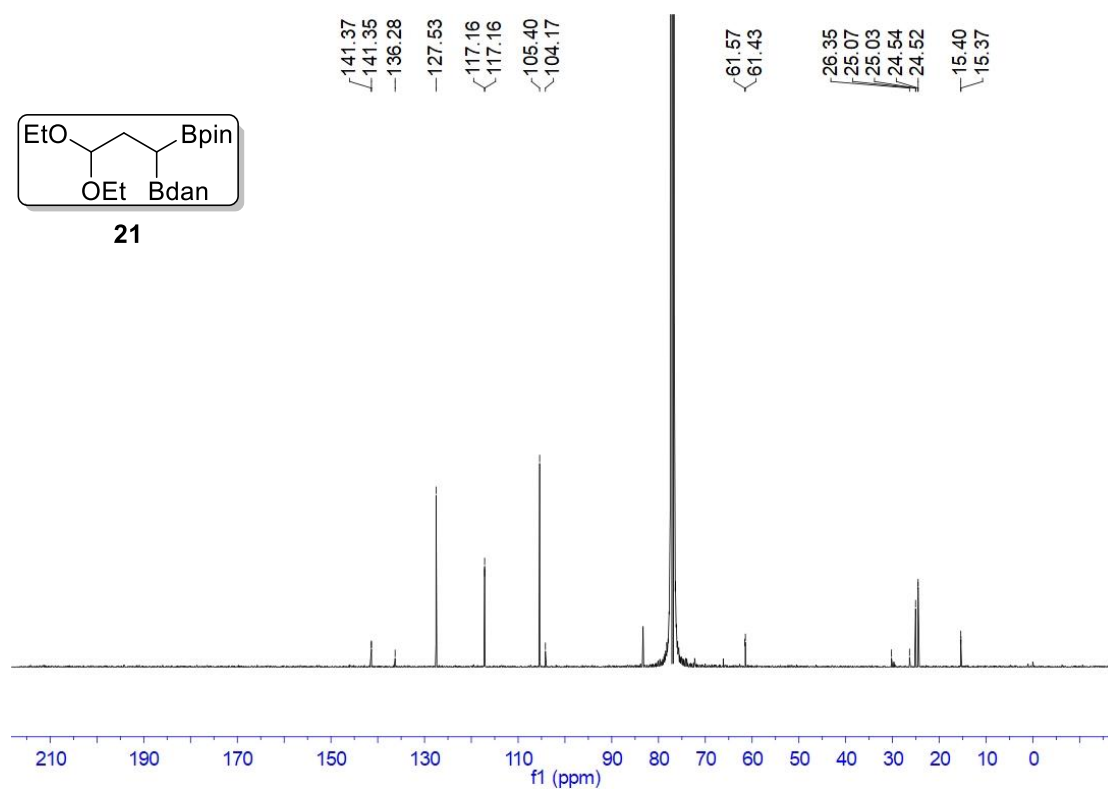

Supplementary Figure 71. <sup>13</sup>C NMR spectrum of compound 21

<sup>11</sup>B NMR (160 MHz, room temperature, CDCl<sub>3</sub>)

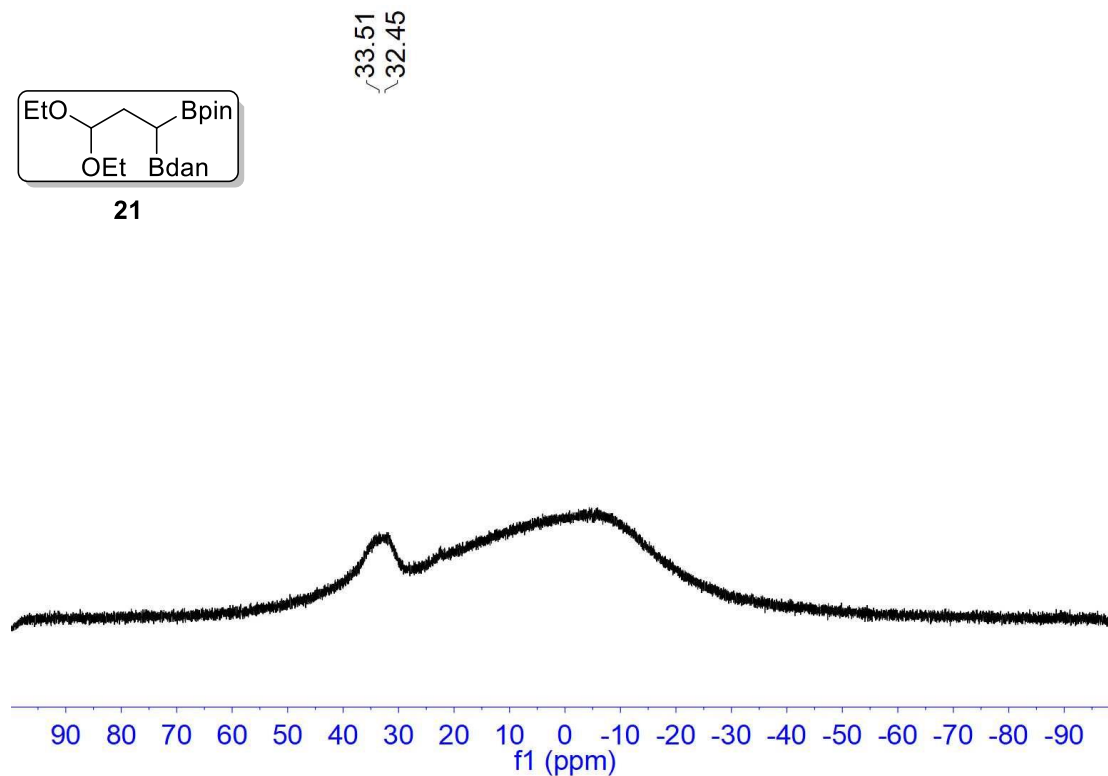

Supplementary Figure 72. <sup>11</sup>B NMR spectrum of compound 21



5-(1H-naphtho[1,8-de][1,3,2]diazaborinin-2(3H)-yl)-5-(4,4,5,5-tetramethyl-1,3,2-dioxaborolan-2-yl)pentyl (2E,4E)-hexa-2,4-dienoate (22)

<sup>1</sup>H NMR (500 MHz, room temperature, CDCl<sub>3</sub>)

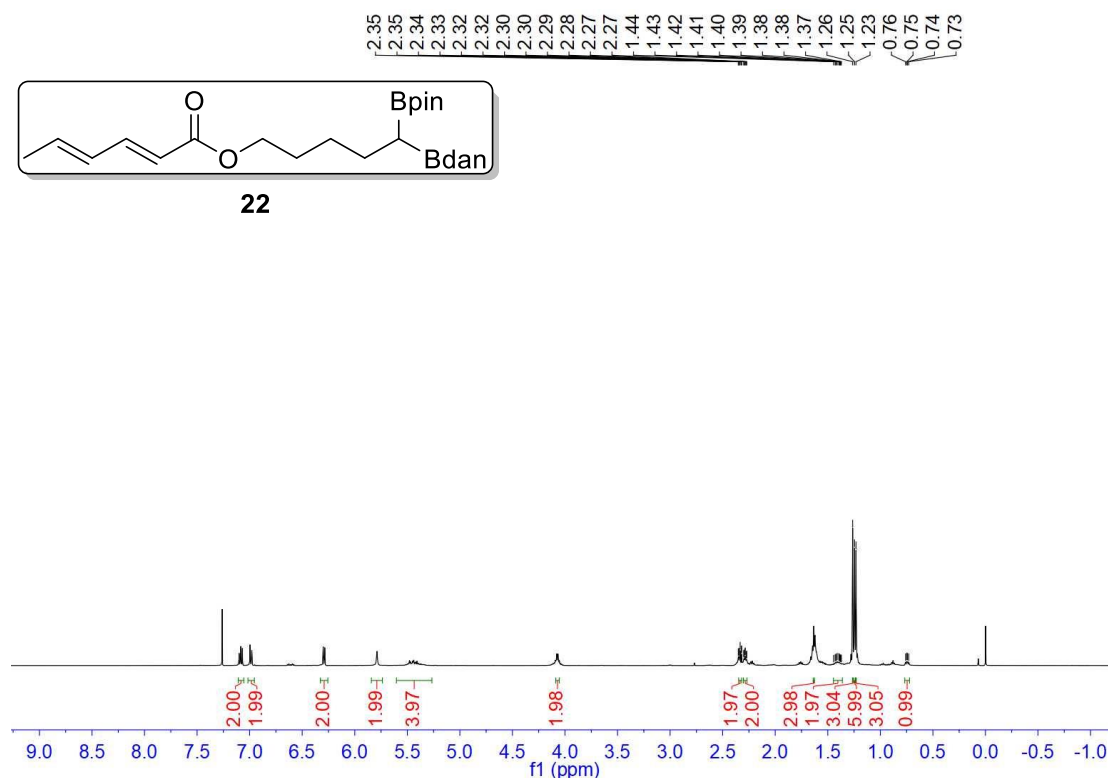

Supplementary Figure 73. <sup>1</sup>H NMR spectrum of compound 22

<sup>13</sup>C NMR (126 MHz, room temperature, CDCl<sub>3</sub>)

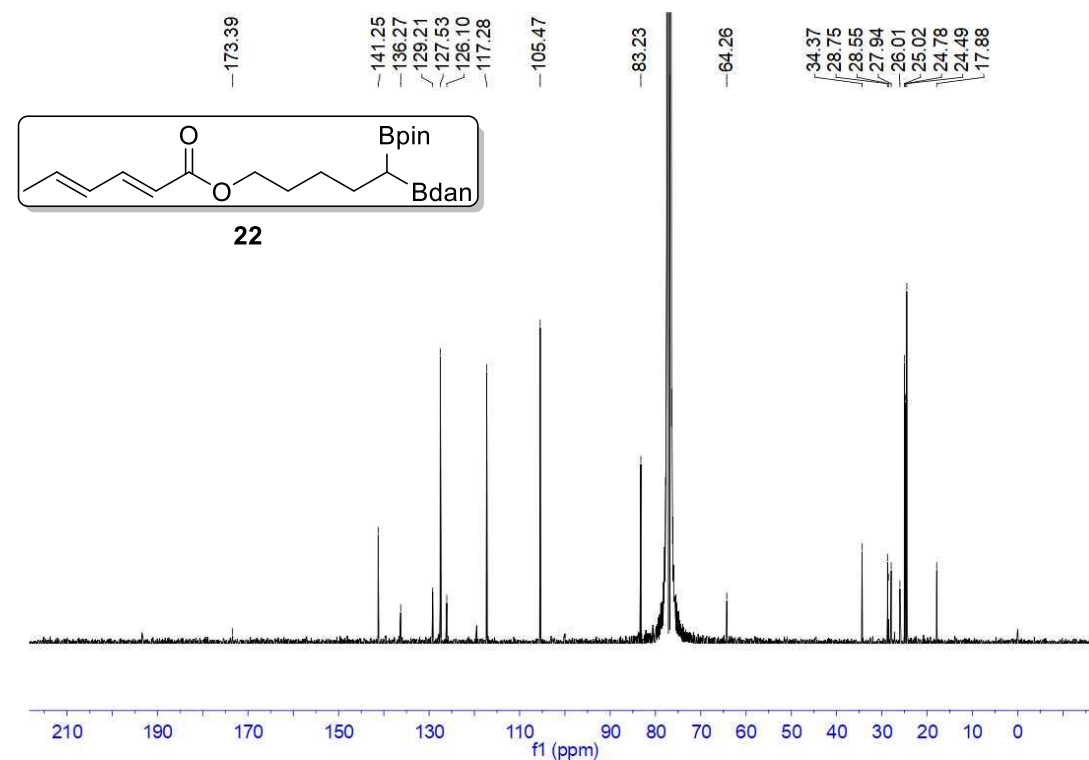

Supplementary Figure 74. <sup>13</sup>C NMR spectrum of compound 22

<sup>11</sup>B NMR (160 MHz, room temperature, CDCl<sub>3</sub>)

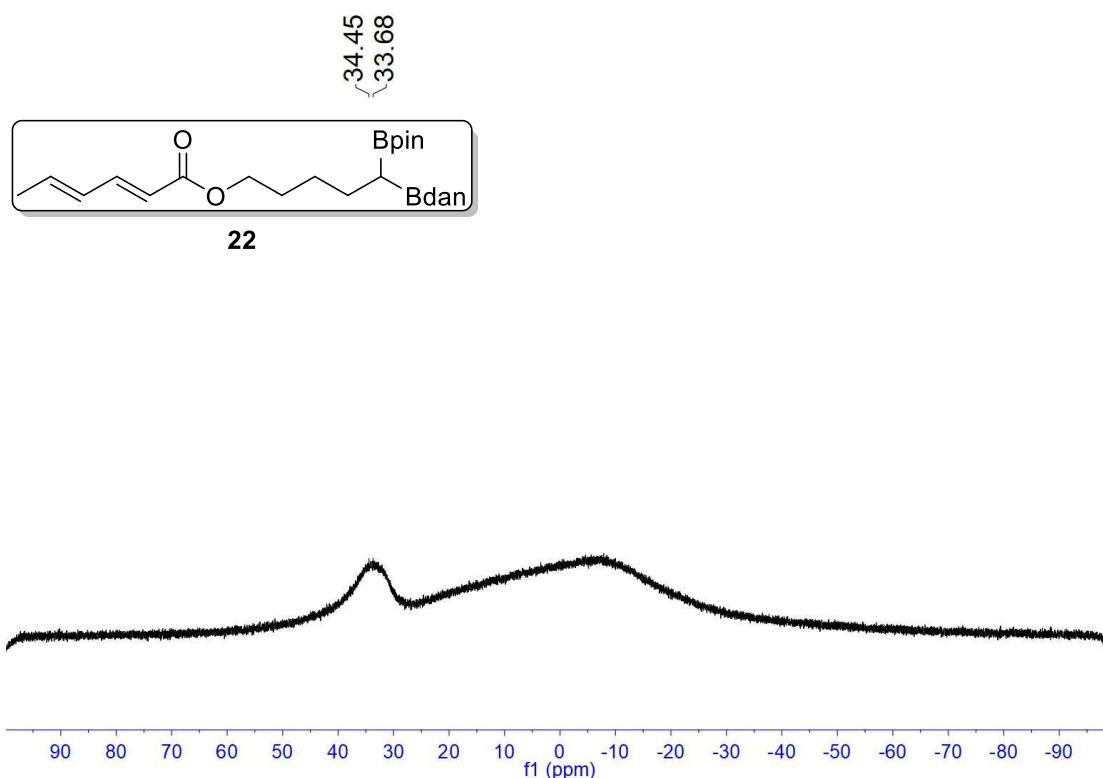

Supplementary Figure 75. <sup>11</sup>B NMR spectrum of compound 22

5-(1H-naphtho[1,8-de][1,3,2]diazaborinin-2(3H)-yl)-5-(4,4,5,5-tetramethyl-1,3,2-dioxaborolan-2-yl)pentyl 2-propylpentanoate (23)

<sup>1</sup>H NMR (500 MHz, room temperature, CDCl<sub>3</sub>)

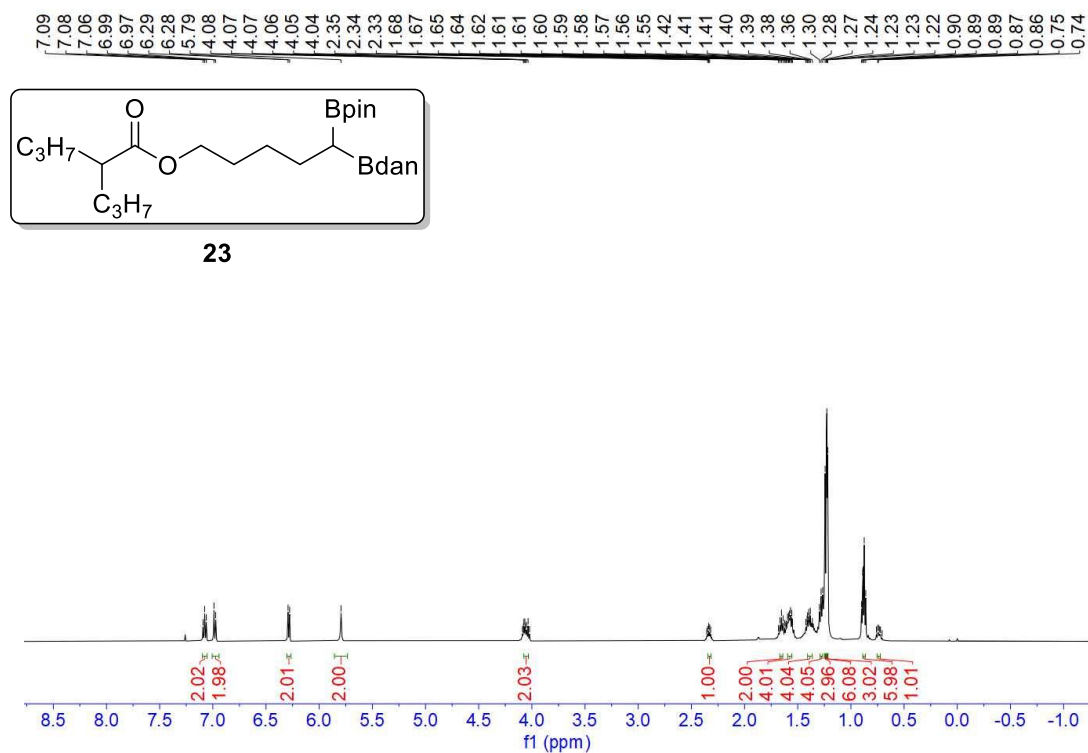

Supplementary Figure 76. <sup>1</sup>H NMR spectrum of compound 23

**<sup>13</sup>C NMR (126 MHz, room temperature, CDCl<sub>3</sub>)**

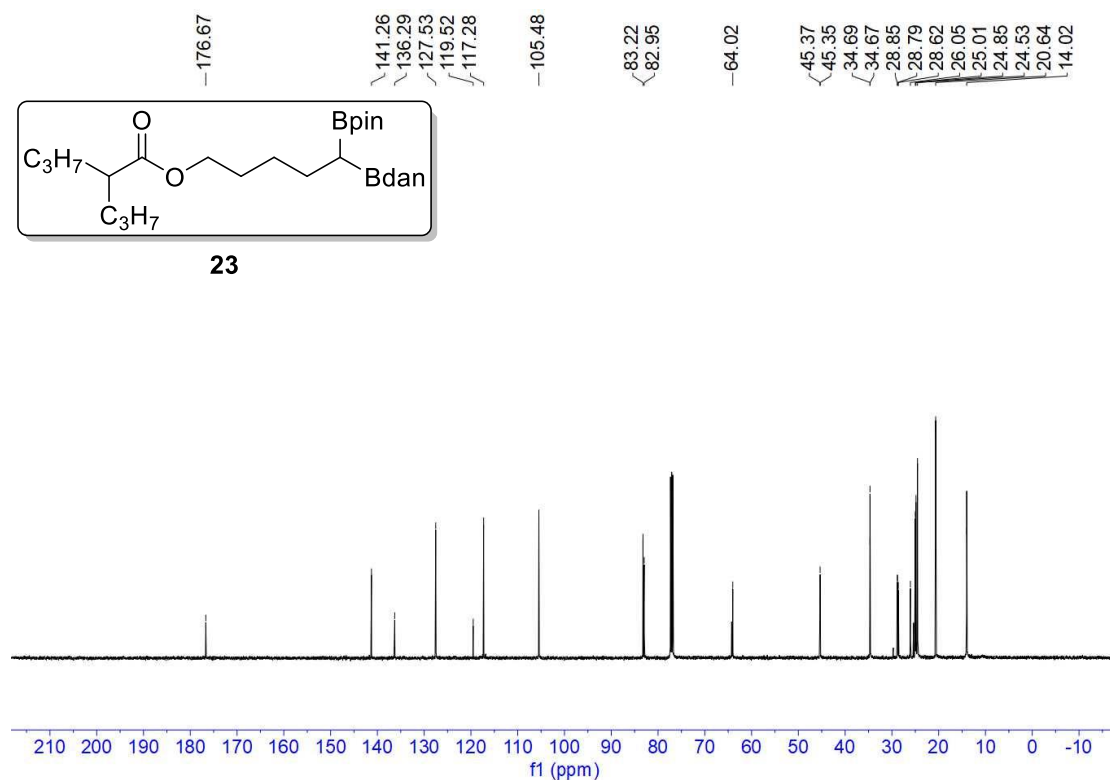

Supplementary Figure 77. <sup>13</sup>C NMR spectrum of compound 23

**<sup>11</sup>B NMR (160 MHz, room temperature, CDCl<sub>3</sub>)**

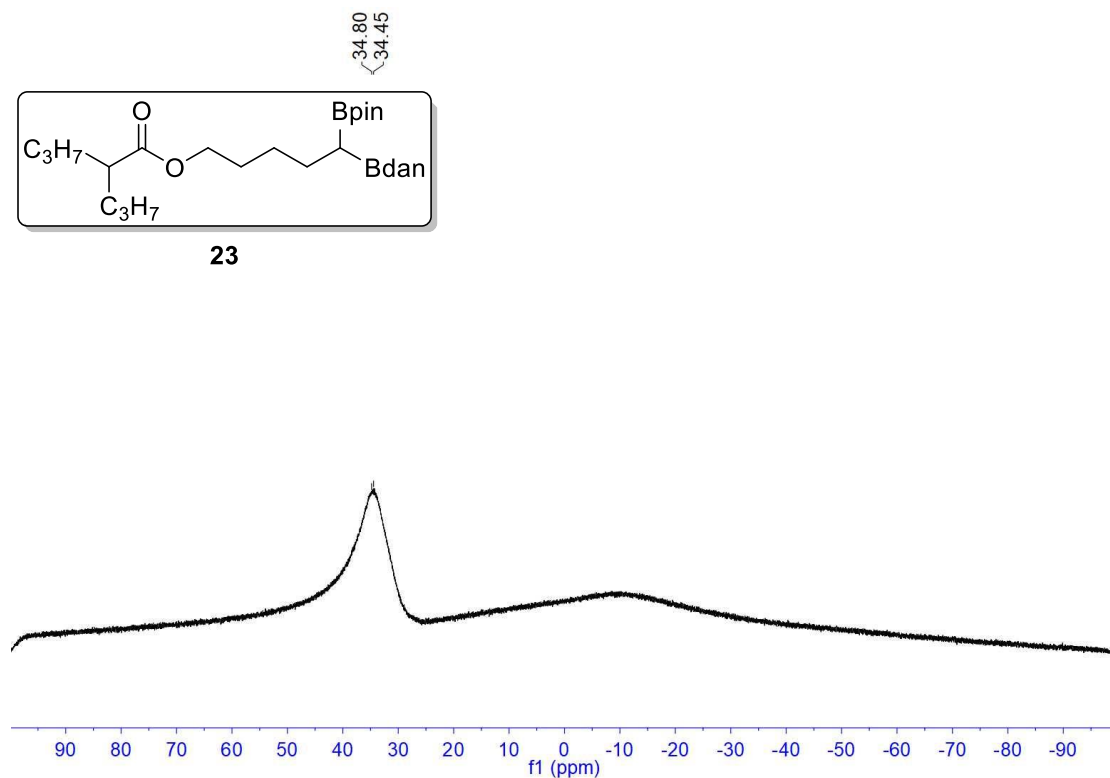

Supplementary Figure 78. <sup>11</sup>B NMR spectrum of compound 23

5-(1H-naphtho[1,8-de][1,3,2]diazaborinin-2(3H)-yl)-5-(4,4,5,5-tetramethyl-1,3,2-dioxaborolan-2-yl)pentyl 1-phenylcyclopentane-1-carboxylate (**24**)

<sup>1</sup>H NMR (500 MHz, room temperature, CDCl<sub>3</sub>)

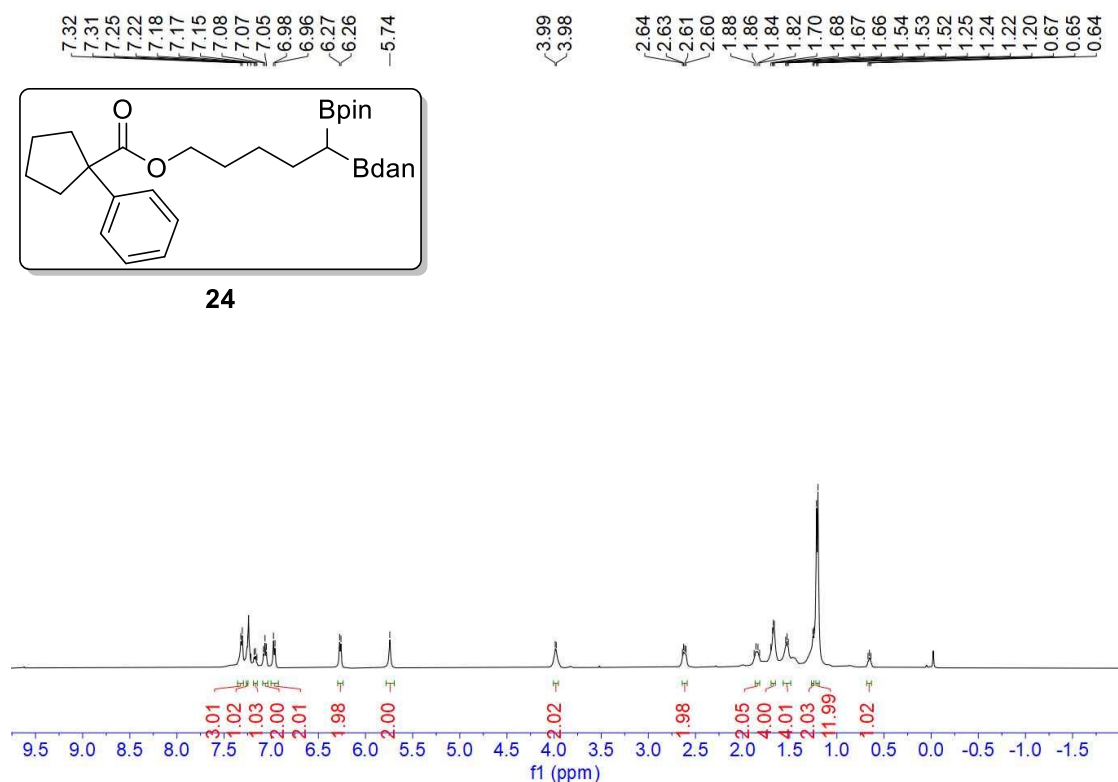

Supplementary Figure 79. <sup>1</sup>H NMR spectrum of compound **24**

<sup>13</sup>C NMR (126 MHz, room temperature, CDCl<sub>3</sub>)

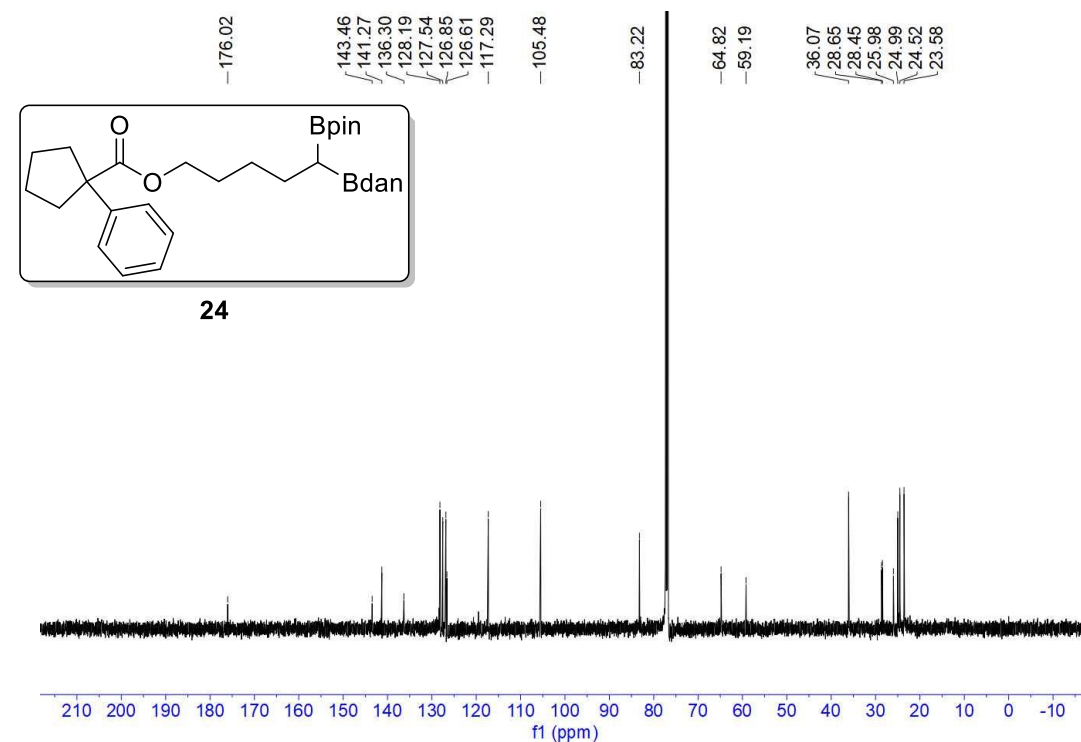

Supplementary Figure 80. <sup>13</sup>C NMR spectrum of compound **24**

**<sup>11</sup>B NMR (160 MHz, room temperature, CDCl<sub>3</sub>)**

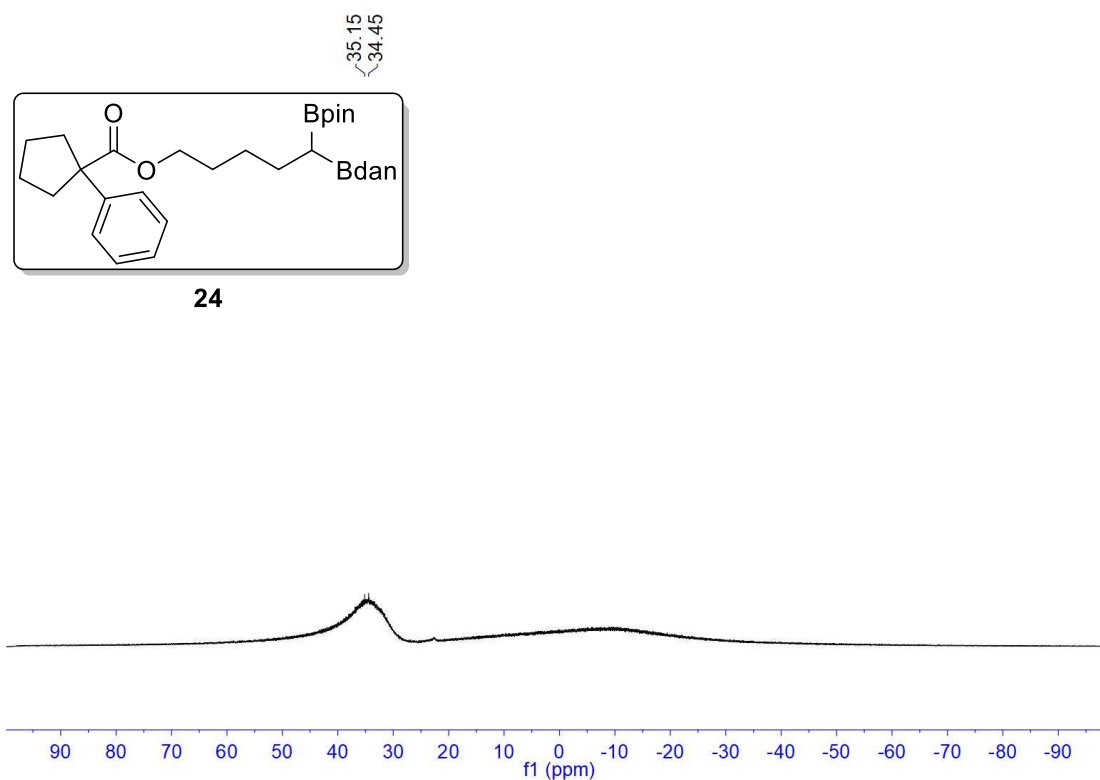

**24**

**Supplementary Figure 81. <sup>11</sup>B NMR spectrum of compound 24**

**5-(1H-naphtho[1,8-de][1,3,2]diazaborinin-2(3H)-yl)-5-(4,4,5,5-tetramethyl-1,3,2-dioxaborolan-2-yl)pentyl (2R)-2-phenylpropanoate (25)**

**<sup>1</sup>H NMR (500 MHz, room temperature, CDCl<sub>3</sub>)**

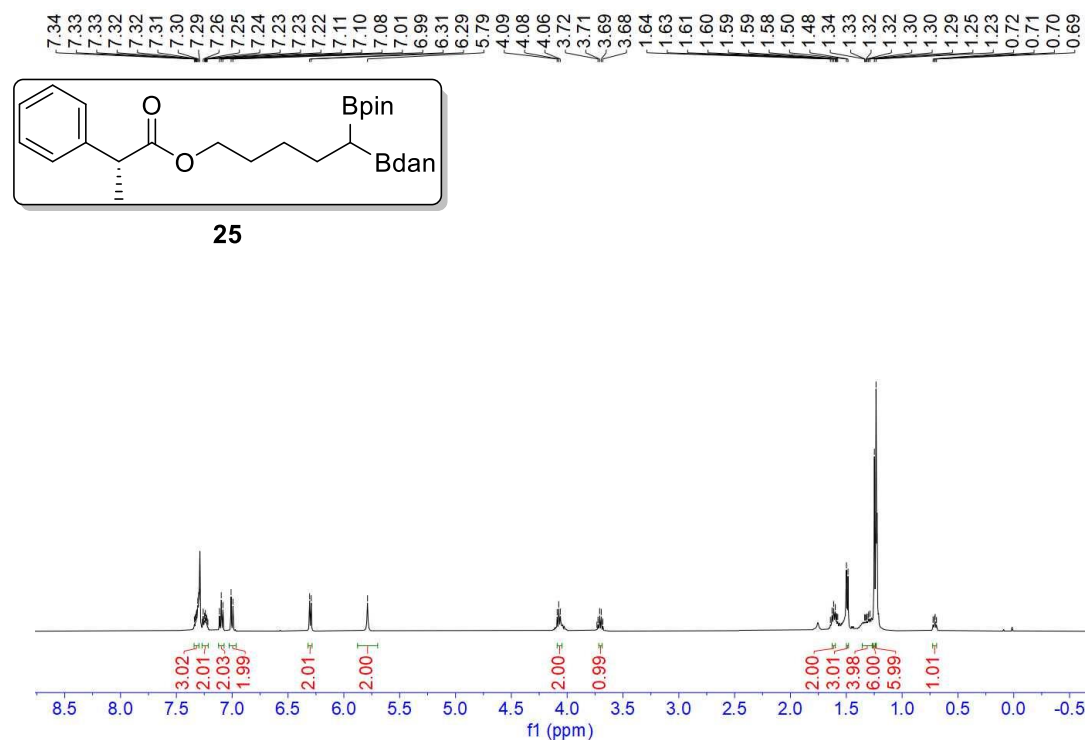

**25**

**Supplementary Figure 82. <sup>1</sup>H NMR spectrum of compound 25**

**<sup>13</sup>C NMR (126 MHz, room temperature, CDCl<sub>3</sub>)**

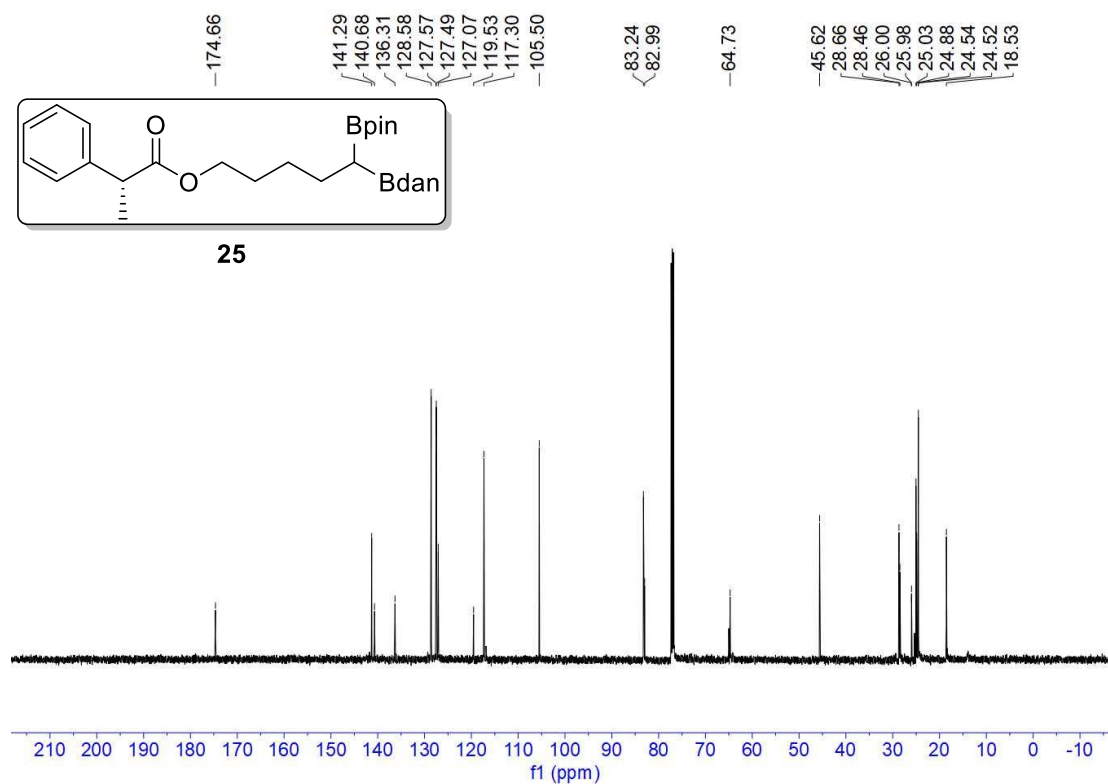

Supplementary Figure 83. <sup>13</sup>C NMR spectrum of compound 25

**<sup>11</sup>B NMR (160 MHz, room temperature, CDCl<sub>3</sub>)**

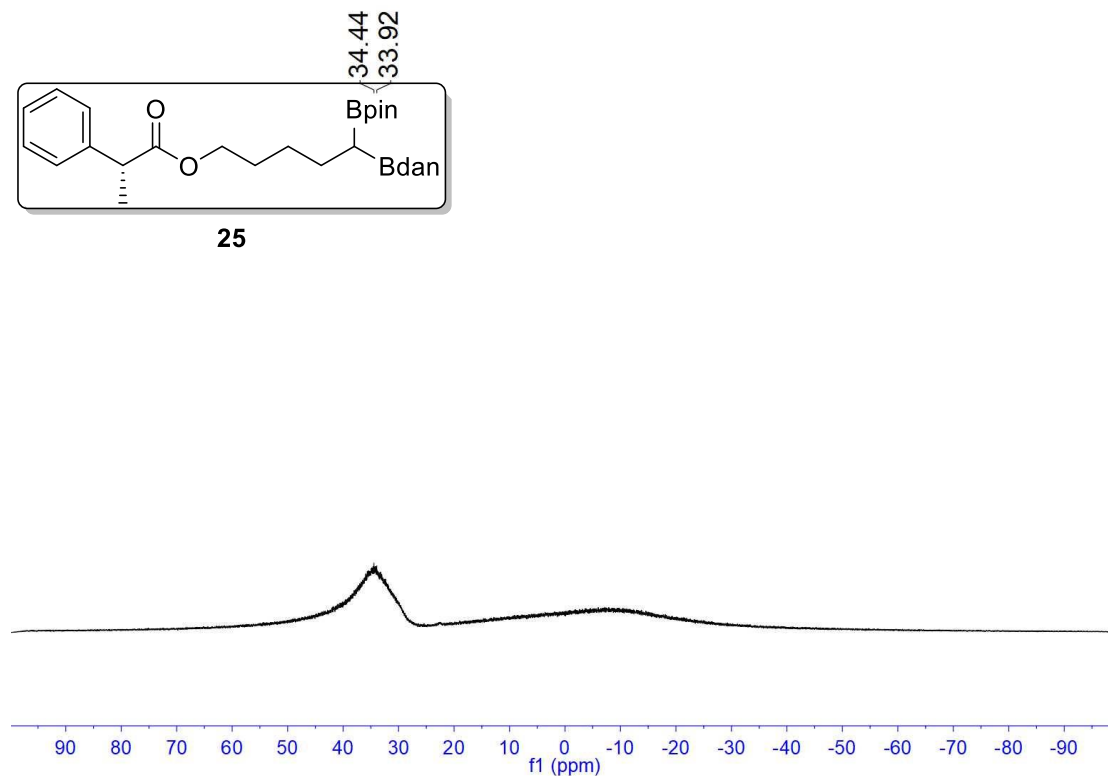

Supplementary Figure 84. <sup>11</sup>B NMR spectrum of compound 25

5-(1H-naphtho[1,8-de][1,3,2]diazaborinin-2(3H)-yl)-5-(4,4,5,5-tetramethyl-1,3,2-dioxaborolan-2-yl)pentyl benzoate (26)

<sup>1</sup>H NMR (500 MHz, room temperature, CDCl<sub>3</sub>)

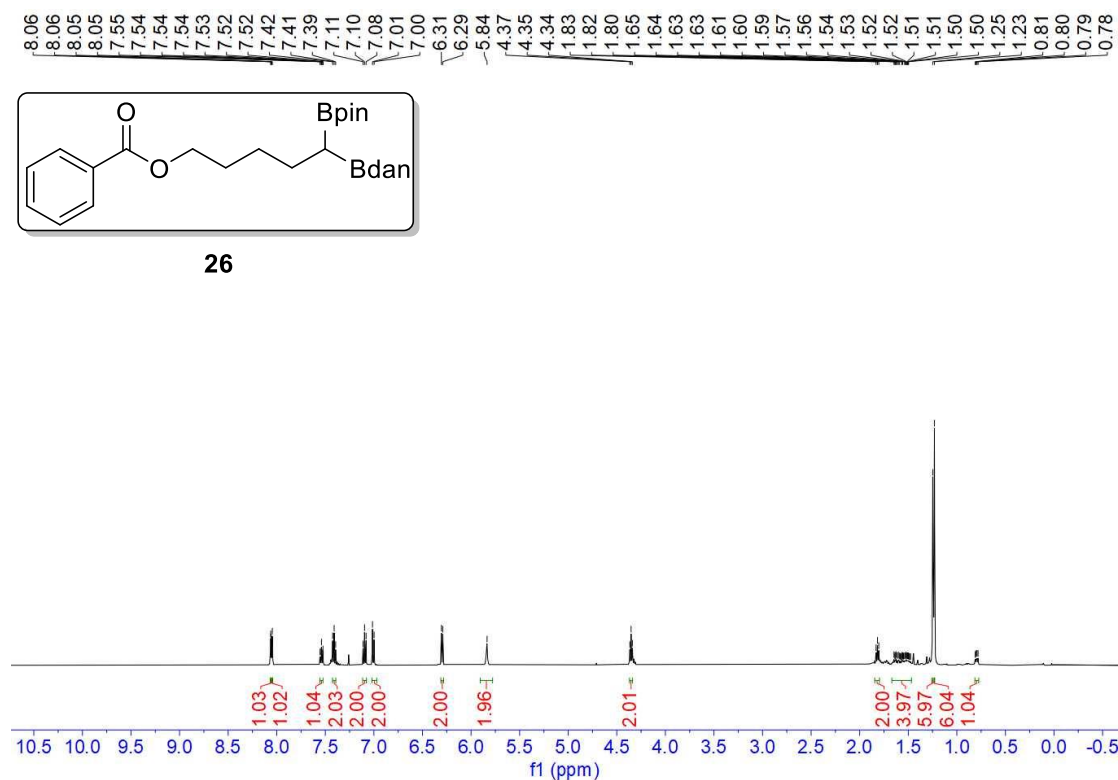

Supplementary Figure 85. <sup>1</sup>H NMR spectrum of compound 26

<sup>13</sup>C NMR (126 MHz, room temperature, CDCl<sub>3</sub>)

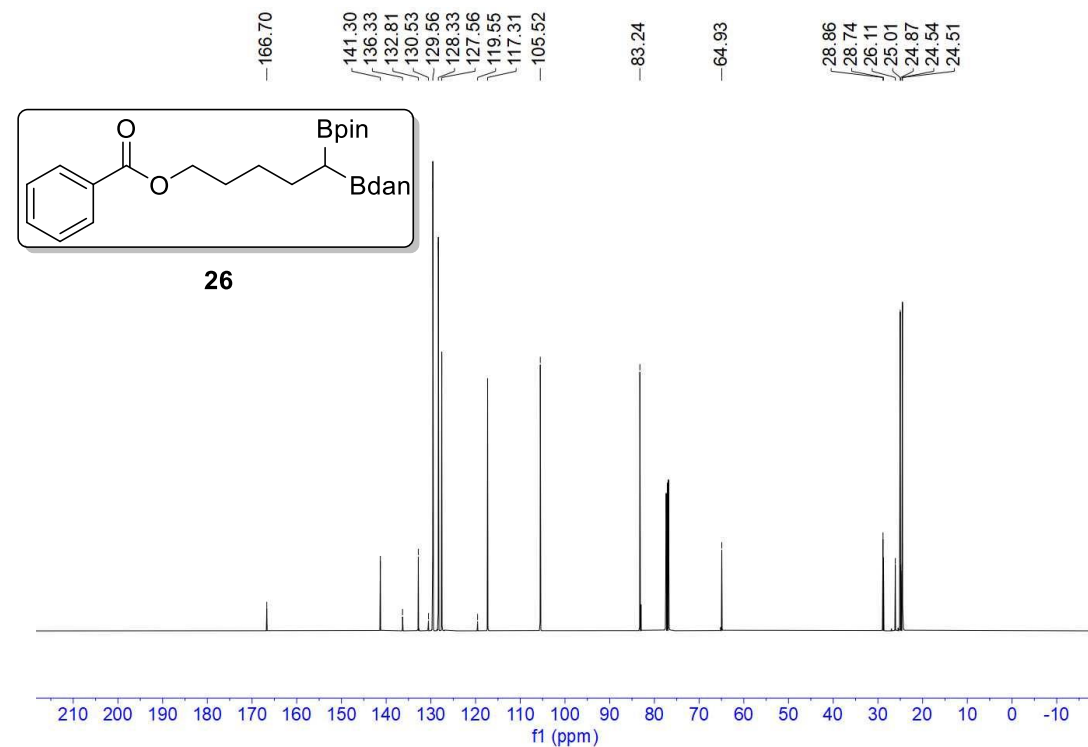

Supplementary Figure 86. <sup>13</sup>C NMR spectrum of compound 26

<sup>11</sup>B NMR (160 MHz, room temperature, CDCl<sub>3</sub>)

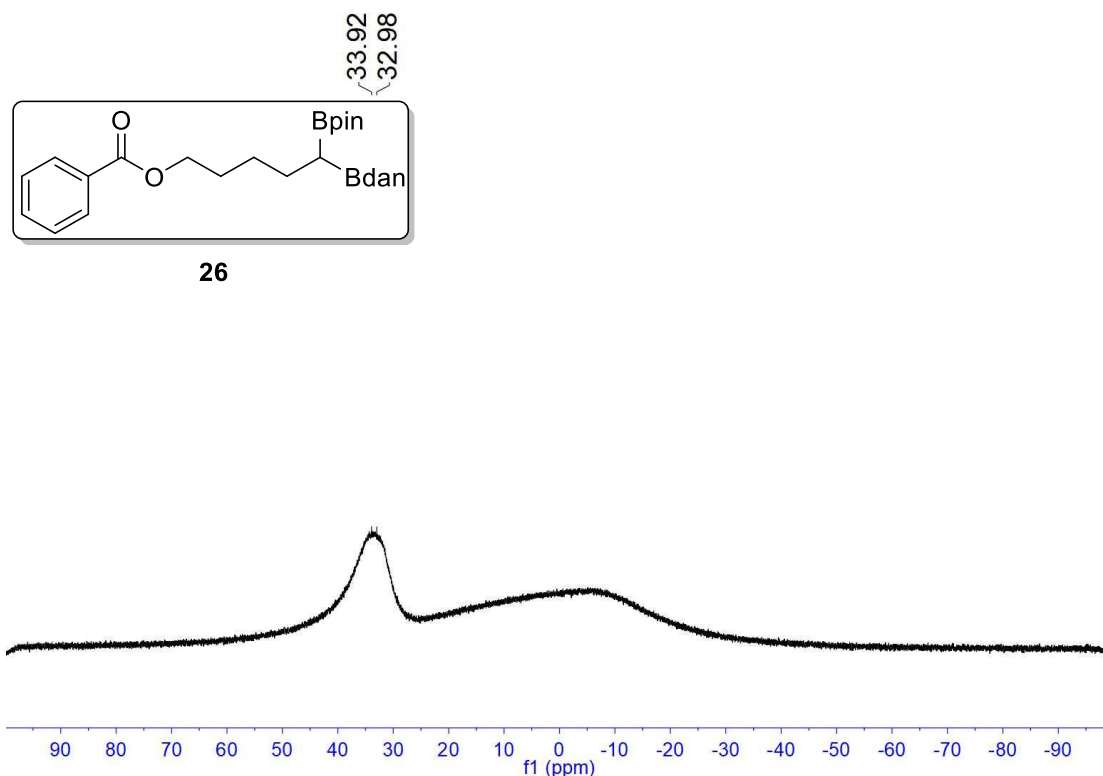

Supplementary Figure 87. <sup>11</sup>B NMR spectrum of compound 26

5-(1H-naphtho[1,8-de][1,3,2]diazaborinin-2(3H)-yl)-5-(4,4,5,5-tetramethyl-1,3,2-dioxaborolan-2-yl)pentyl (2S)-2-(4-isobutylphenyl)propanoate (27)

<sup>1</sup>H NMR (500 MHz, room temperature, CDCl<sub>3</sub>)

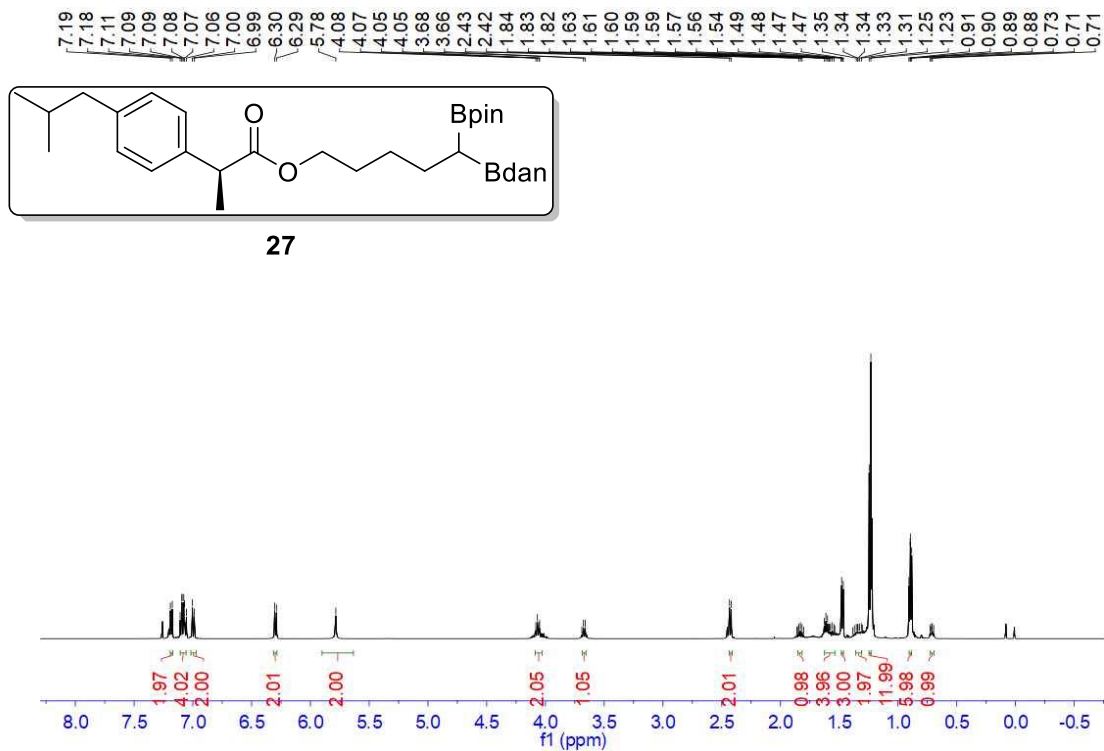

Supplementary Figure 88. <sup>1</sup>H NMR spectrum of compound 27



$^{13}\text{C}$  NMR (126 MHz, room temperature,  $\text{CDCl}_3$ )

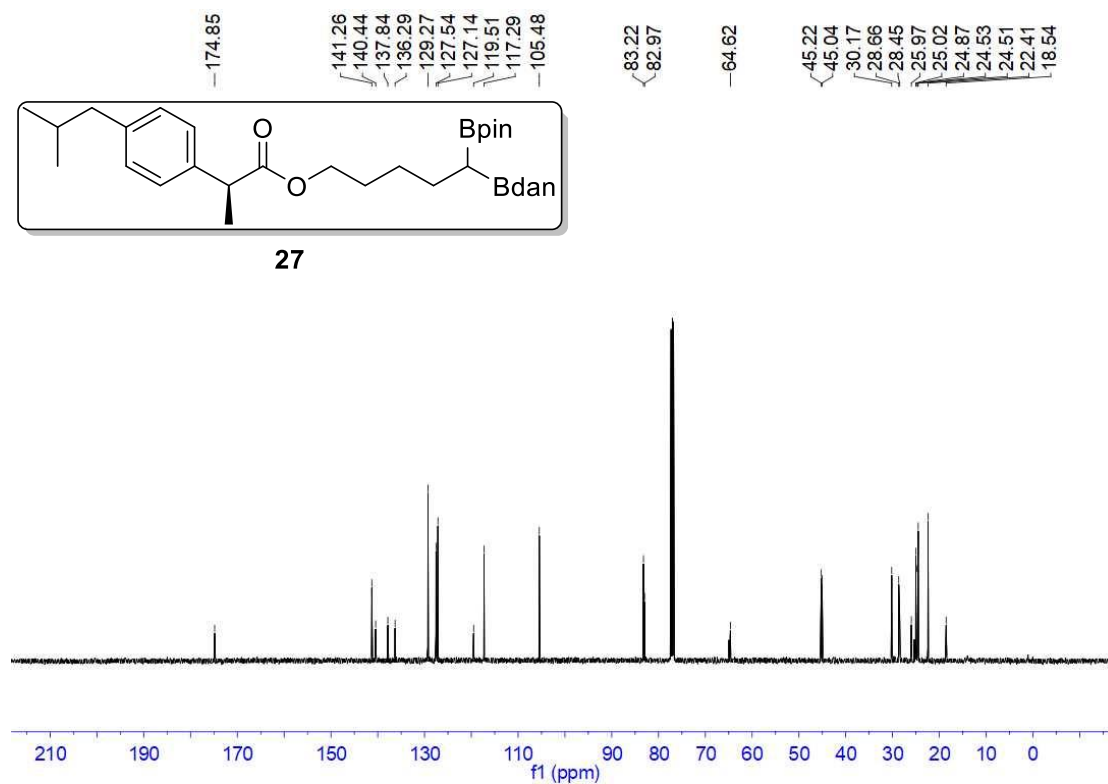

Supplementary Figure 89.  $^{13}\text{C}$  NMR spectrum of compound 27

$^{11}\text{B}$  NMR (160 MHz, room temperature,  $\text{CDCl}_3$ )

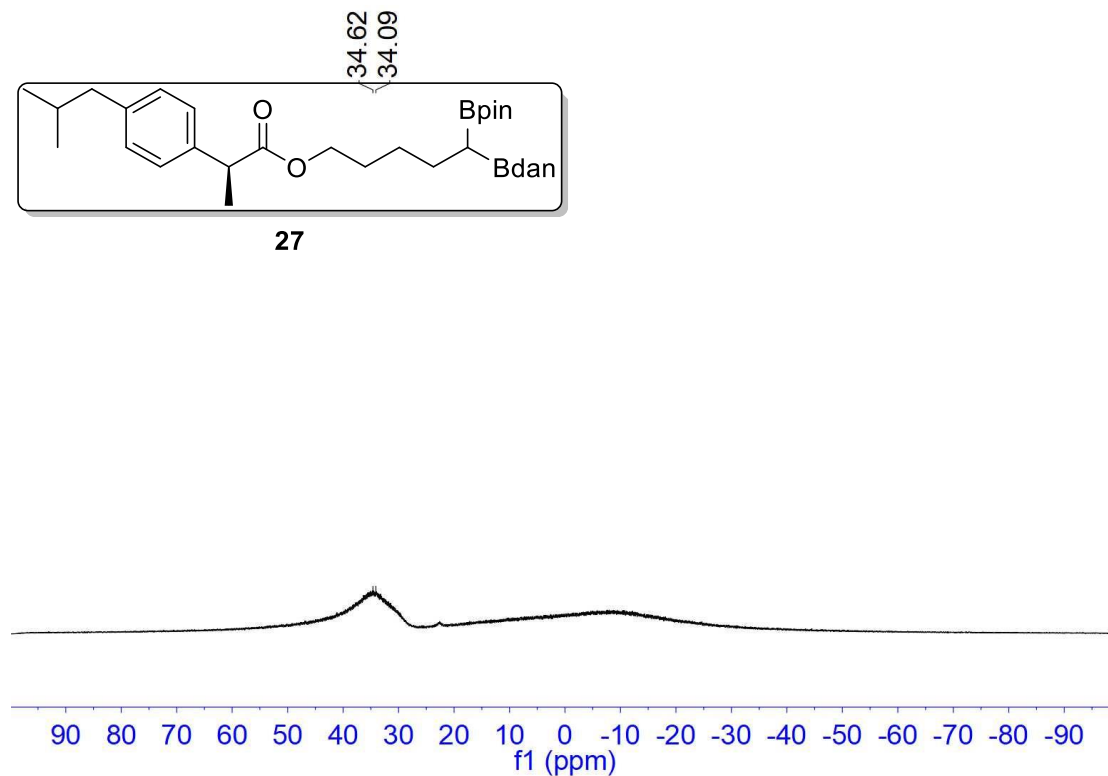

Supplementary Figure 90.  $^{11}\text{B}$  NMR spectrum of compound 27

5-(1H-naphtho[1,8-de][1,3,2]diazaborinin-2(3H)-yl)-5-(4,4,5,5-tetramethyl-1,3,2-dioxaborolan-2-yl)pentyl (E)-2-methyl-3-phenylacrylate (28)

<sup>1</sup>H NMR (500 MHz, room temperature, CDCl<sub>3</sub>)

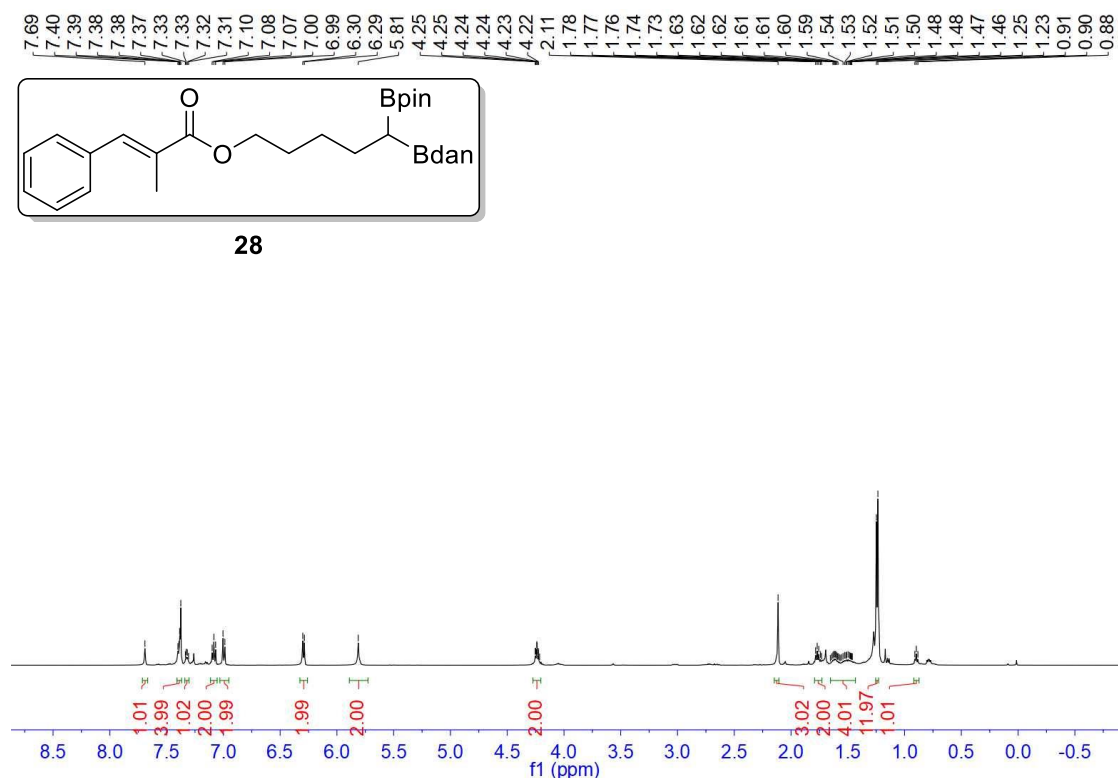

Supplementary Figure 91. <sup>1</sup>H NMR spectrum of compound 28

<sup>13</sup>C NMR (126 MHz, room temperature, CDCl<sub>3</sub>)

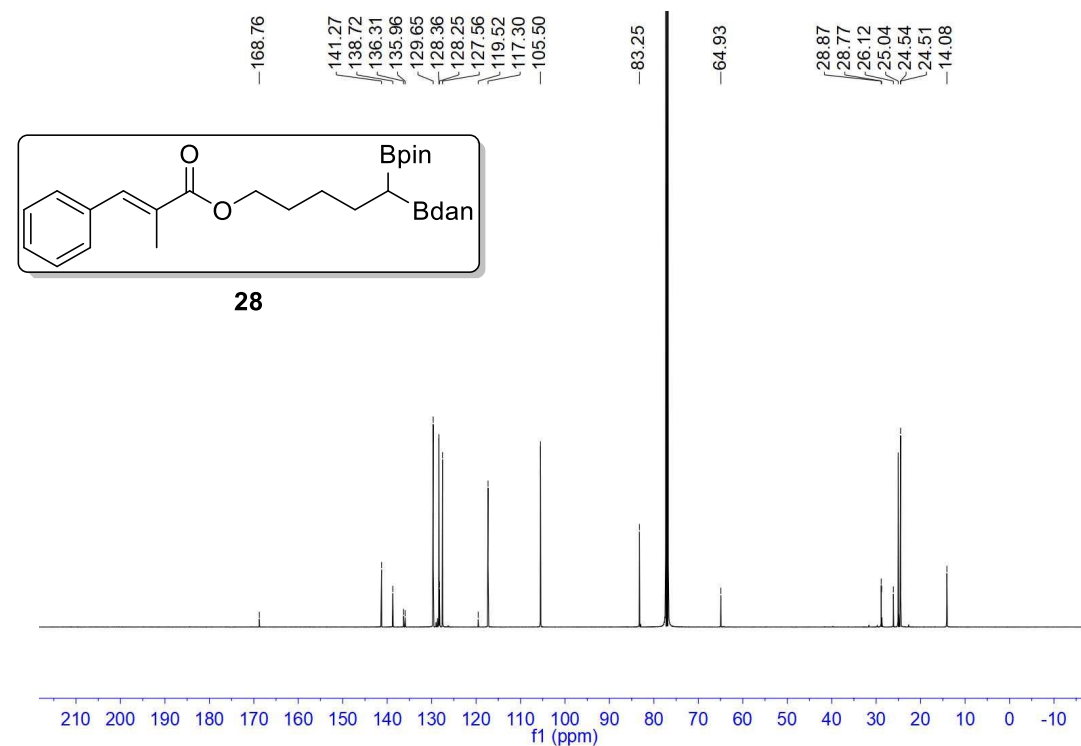

Supplementary Figure 92. <sup>13</sup>C NMR spectrum of compound 28

$^{11}\text{B}$  NMR (160 MHz, room temperature,  $\text{CDCl}_3$ )

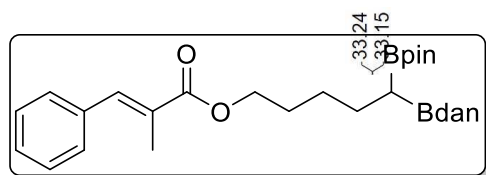

28

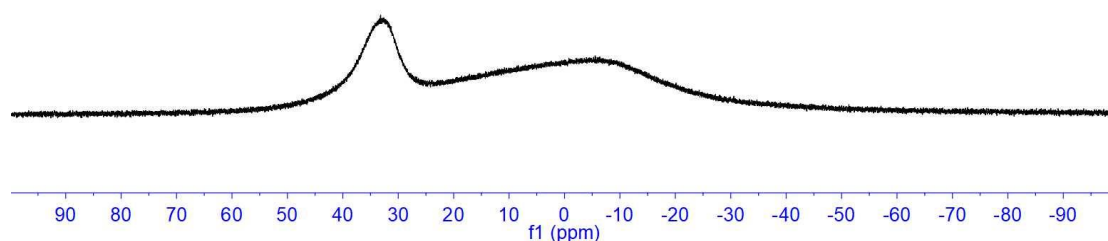

Supplementary Figure 93.  $^{11}\text{B}$  NMR spectrum of compound 28

5-(1H-naphtho[1,8-de][1,3,2]diazaborinin-2(3H)-yl)-5-(4,4,5,5-tetramethyl-1,3,2-dioxaborolan-2-yl)pentyl (1R,2S,4R)-bicyclo[2.2.1]hept-5-ene-2-carboxylate (29)

$^1\text{H}$  NMR (500 MHz, room temperature,  $\text{CDCl}_3$ )

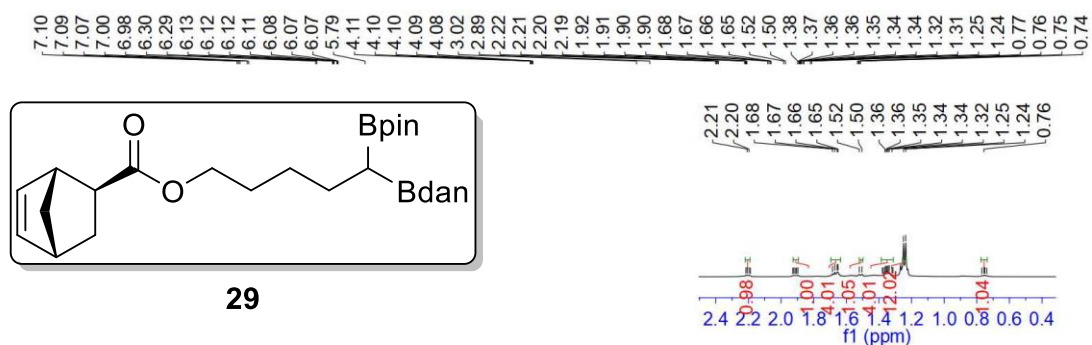

Supplementary Figure 94.  $^1\text{H}$  NMR spectrum of compound 29

<sup>13</sup>C NMR (126 MHz, room temperature, CDCl<sub>3</sub>)

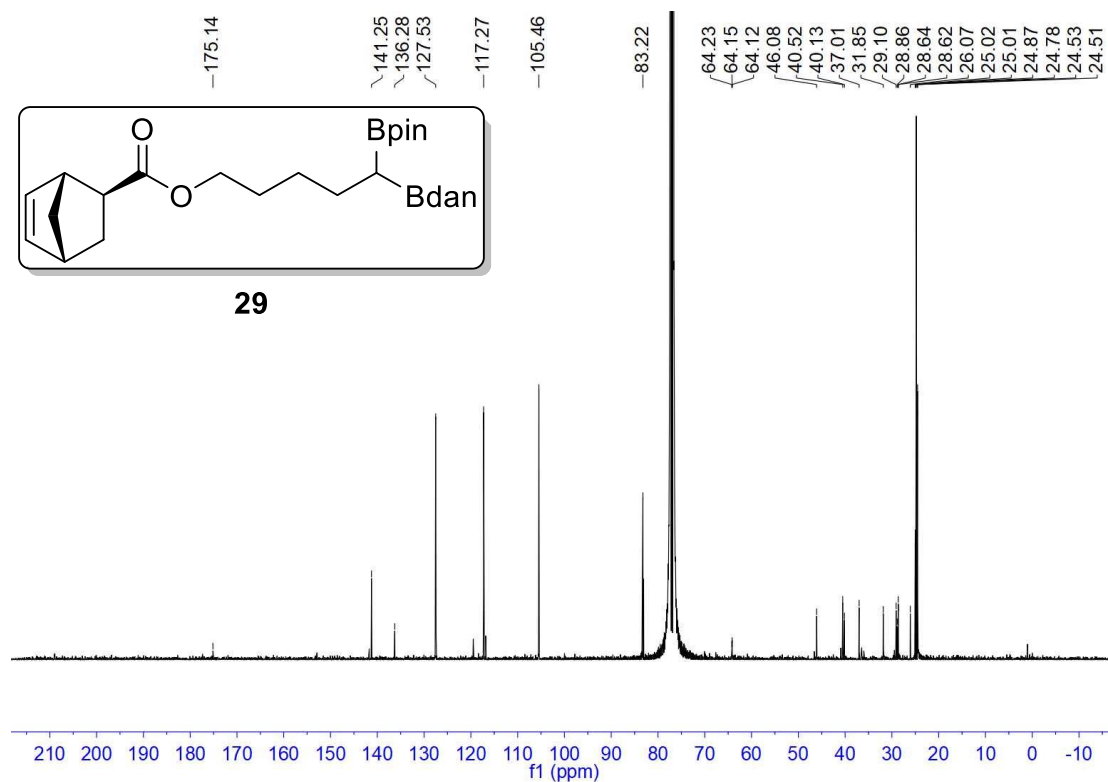

Supplementary Figure 95. <sup>13</sup>C NMR spectrum of compound 29

<sup>11</sup>B NMR (160 MHz, room temperature, CDCl<sub>3</sub>)

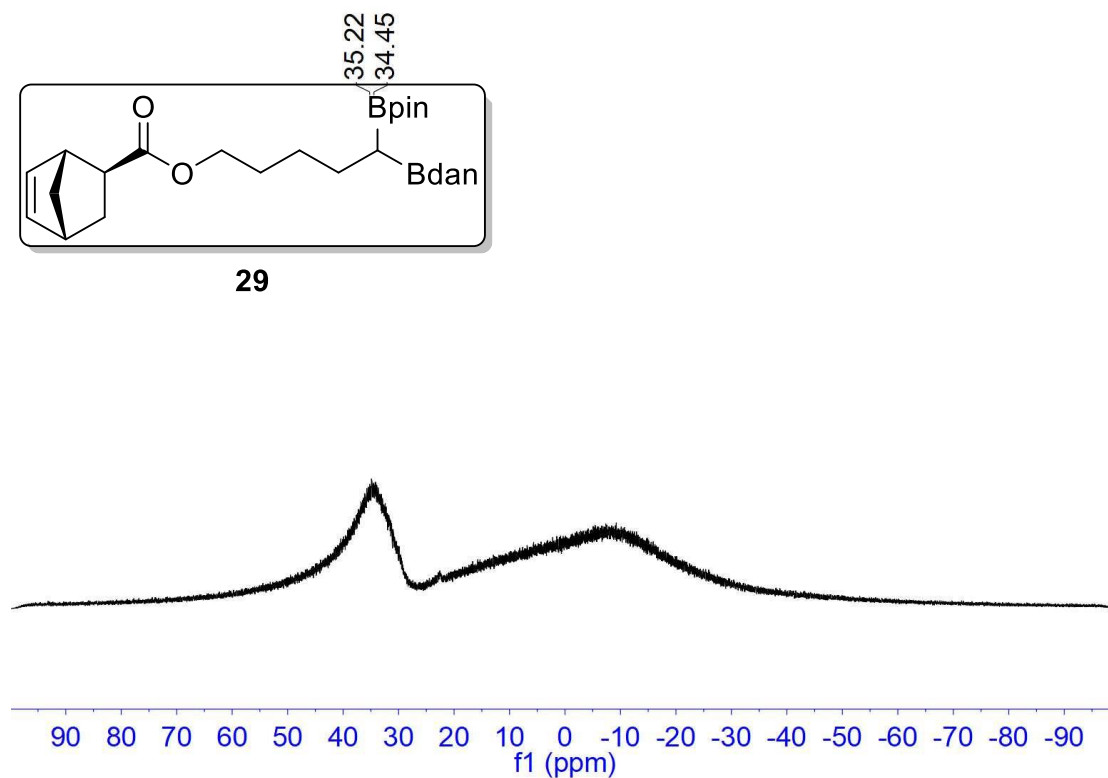

Supplementary Figure 96. <sup>11</sup>B NMR spectrum of compound 29

**5-(1H-naphtho[1,8-de][1,3,2]diazaborinin-2(3H)-yl)-5-(4,4,5,5-tetramethyl-1,3,2-dioxaborolan-2-yl)pentyl 2,3-dihydrobenzo[b][1,4]dioxine-2-carboxylate (30)**

**<sup>1</sup>H NMR (500 MHz, room temperature, CDCl<sub>3</sub>)**

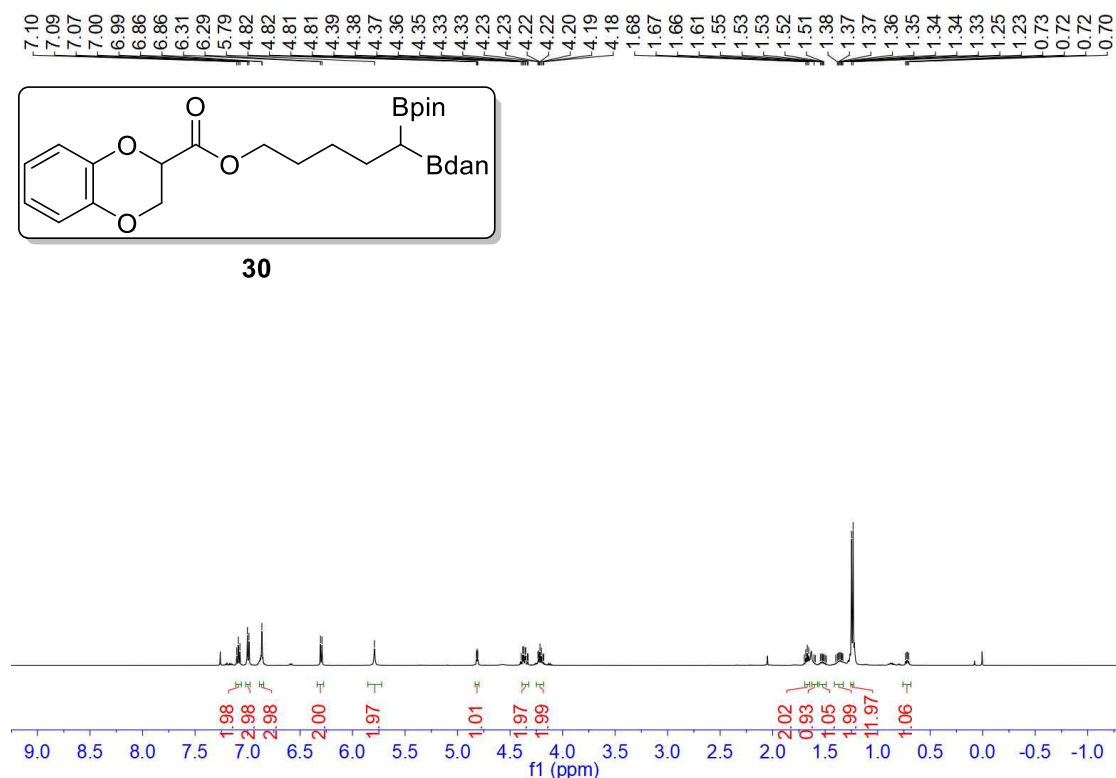

**Supplementary Figure 97. <sup>1</sup>H NMR spectrum of compound 30**

**<sup>13</sup>C NMR (126 MHz, room temperature, CDCl<sub>3</sub>)**

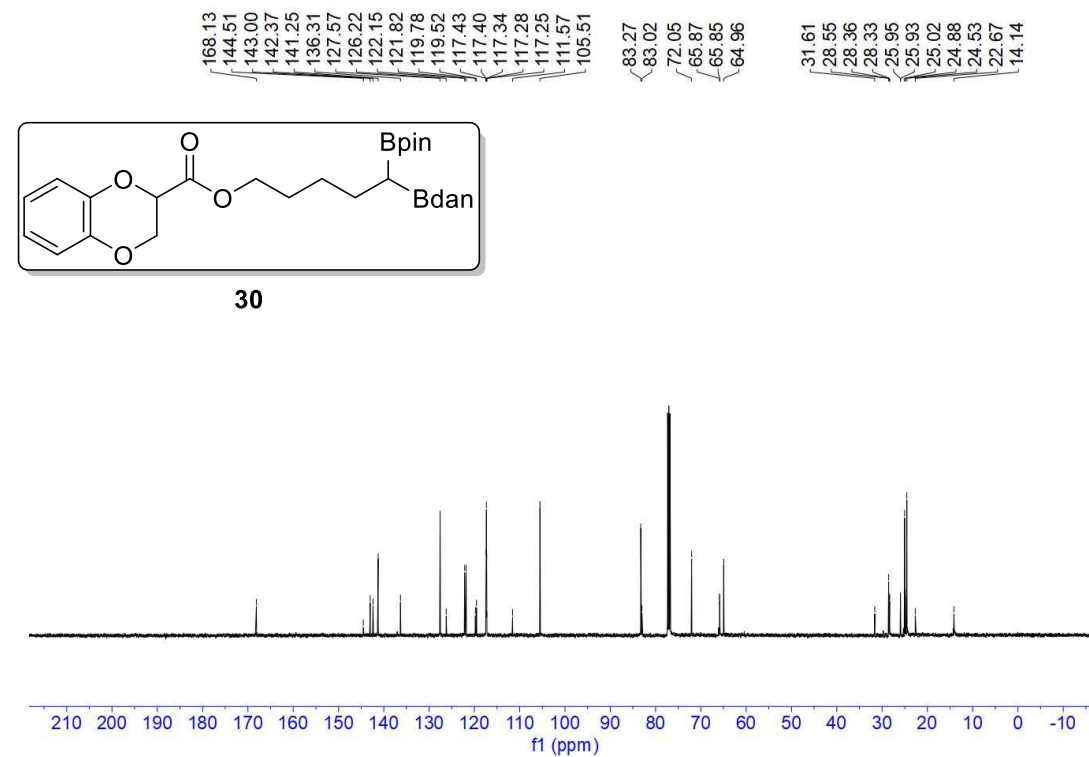

**Supplementary Figure 98. <sup>13</sup>C NMR spectrum of compound 30**

<sup>11</sup>B NMR (160 MHz, room temperature, CDCl<sub>3</sub>)

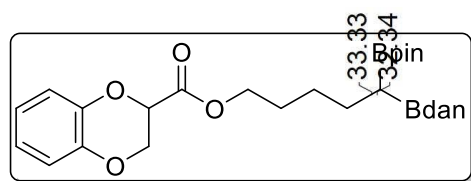

30

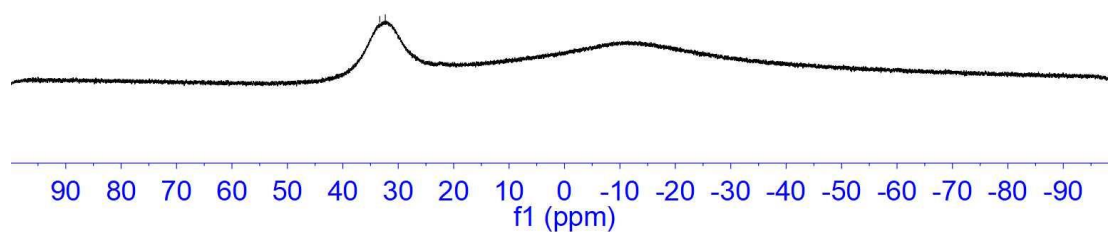

Supplementary Figure 99. <sup>11</sup>B NMR spectrum of compound 30

5-(1H-naphtho[1,8-de][1,3,2]diazaborinin-2(3H)-yl)-5-(4,4,5,5-tetramethyl-1,3,2-dioxaborolan-2-yl)pentyl 6-(3-(bicyclo[3.3.1]nonan-1-yl)-4-methoxyphenyl)-2-naphthoate (31)

<sup>1</sup>H NMR (500 MHz, room temperature, CDCl<sub>3</sub>)

8.63  
8.62  
8.03  
8.02  
7.96  
7.90  
7.64  
7.64  
7.11  
7.10  
7.10  
7.08  
7.02  
7.02  
7.02  
7.01  
7.01  
7.00  
6.31  
6.31  
6.30  
6.29  
5.85  
4.44  
4.43  
3.92  
2.23  
2.22  
2.15  
2.14  
2.14  
1.89  
1.84  
1.26  
1.25  
0.92

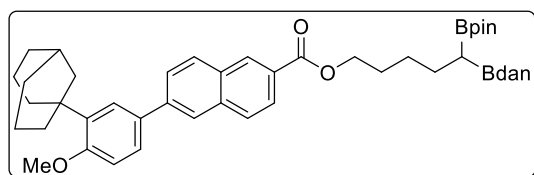

31

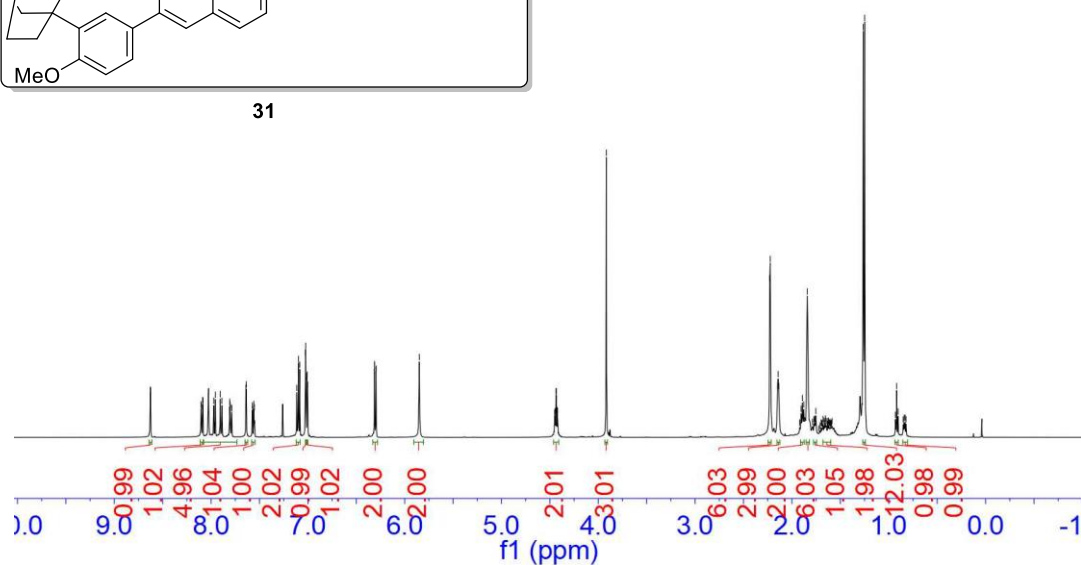

Supplementary Figure 100. <sup>1</sup>H NMR spectrum of compound 31

**<sup>13</sup>C NMR (126 MHz, room temperature, CDCl<sub>3</sub>)**

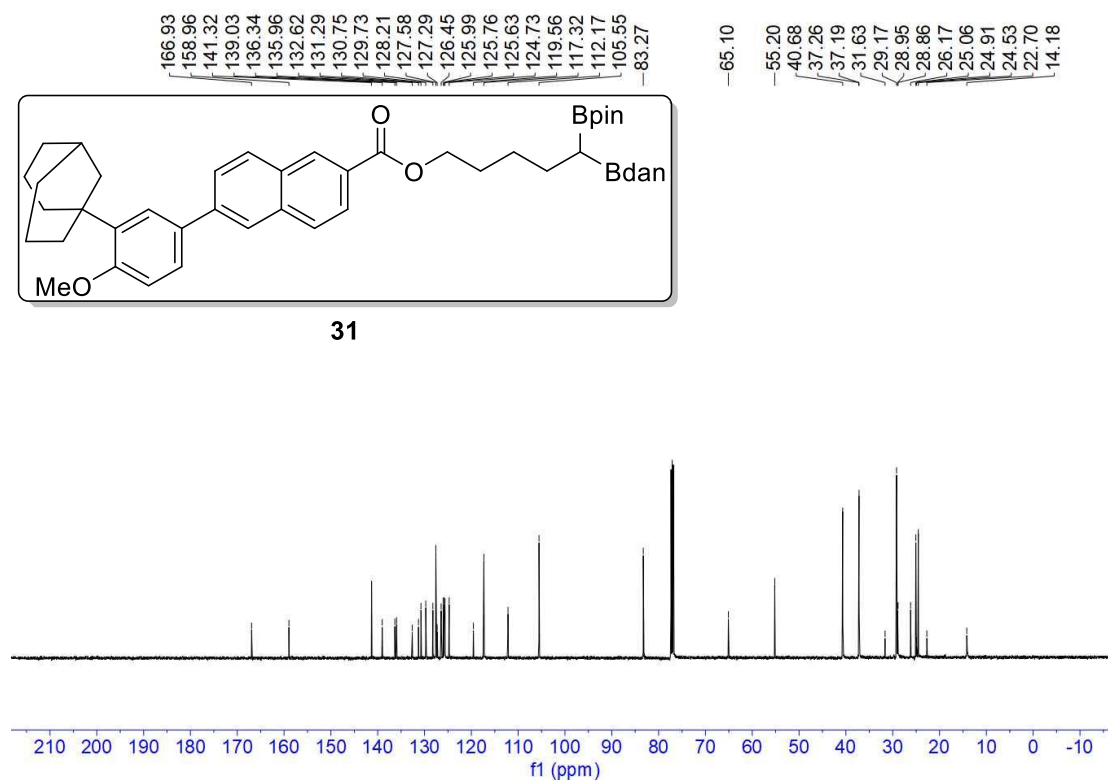

Supplementary Figure 101. <sup>13</sup>C NMR spectrum of compound 31

**<sup>11</sup>B NMR (160 MHz, room temperature, CDCl<sub>3</sub>)**

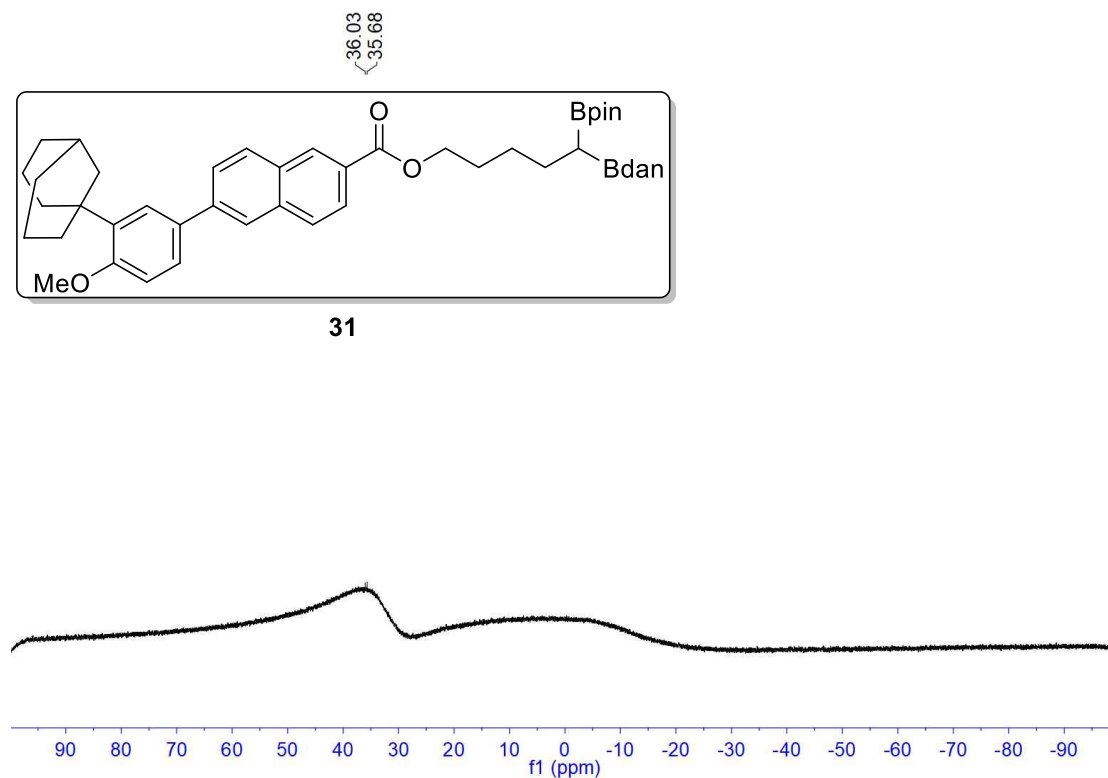

Supplementary Figure 102. <sup>11</sup>B NMR spectrum of compound 31

5-(1H-naphtho[1,8-de][1,3,2]diazaborinin-2(3H)-yl)-5-(4,4,5,5-tetramethyl-1,3,2-dioxaborolan-2-yl)pentyl (2R)-2-(6-methoxynaphthalen-2-yl)propanoate (32)

<sup>1</sup>H NMR (500 MHz, room temperature, CDCl<sub>3</sub>)

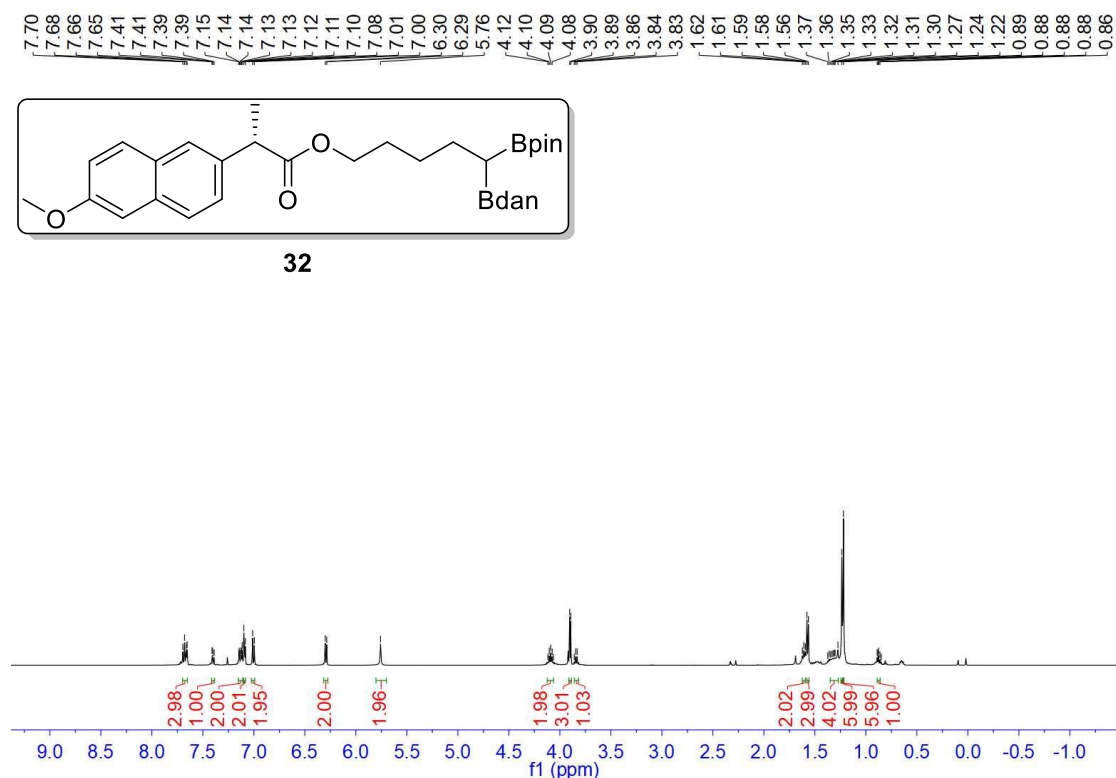

Supplementary Figure 103. <sup>1</sup>H NMR spectrum of compound 32

<sup>13</sup>C NMR (126 MHz, room temperature, CDCl<sub>3</sub>)

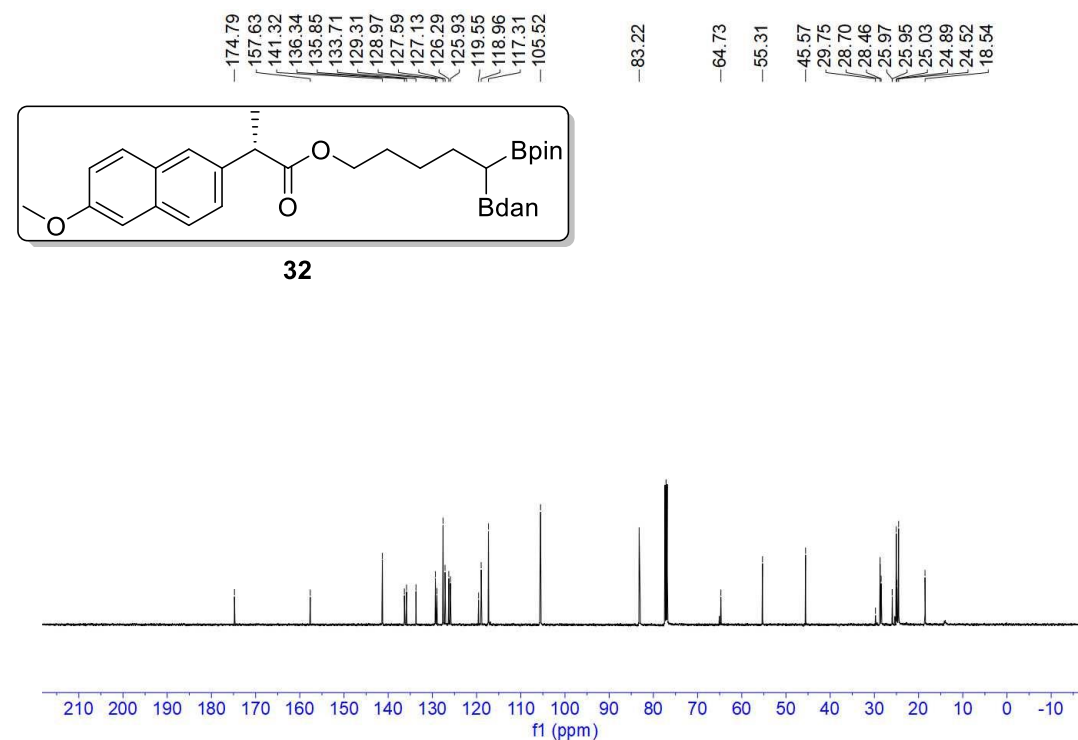

Supplementary Figure 104. <sup>13</sup>C NMR spectrum of compound 32



<sup>11</sup>B NMR (160 MHz, room temperature, CDCl<sub>3</sub>)

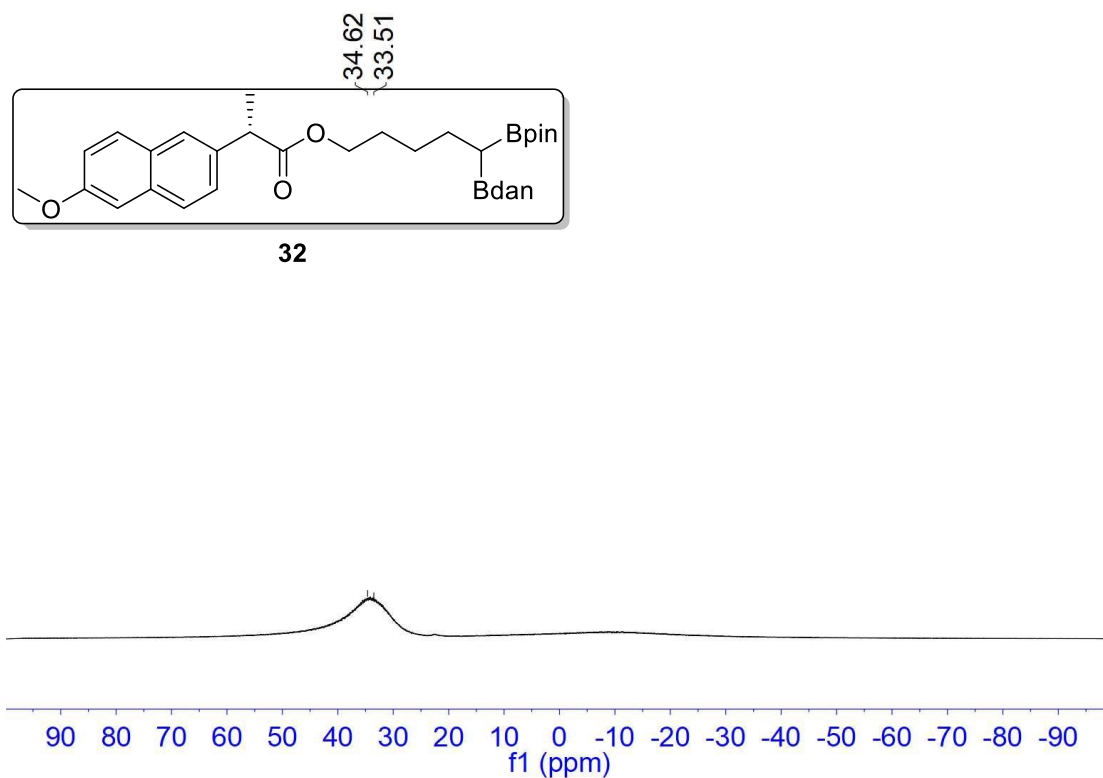

Supplementary Figure 105. <sup>11</sup>B NMR spectrum of compound 32

5-(1H-naphtho[1,8-de][1,3,2]diazaborinin-2(3H)-yl)-5-(4,4,5,5-tetramethyl-1,3,2-dioxaborolan-2-yl)pentyl 4-cyclohexylbenzoate (33)

<sup>1</sup>H NMR (500 MHz, room temperature, CDCl<sub>3</sub>)

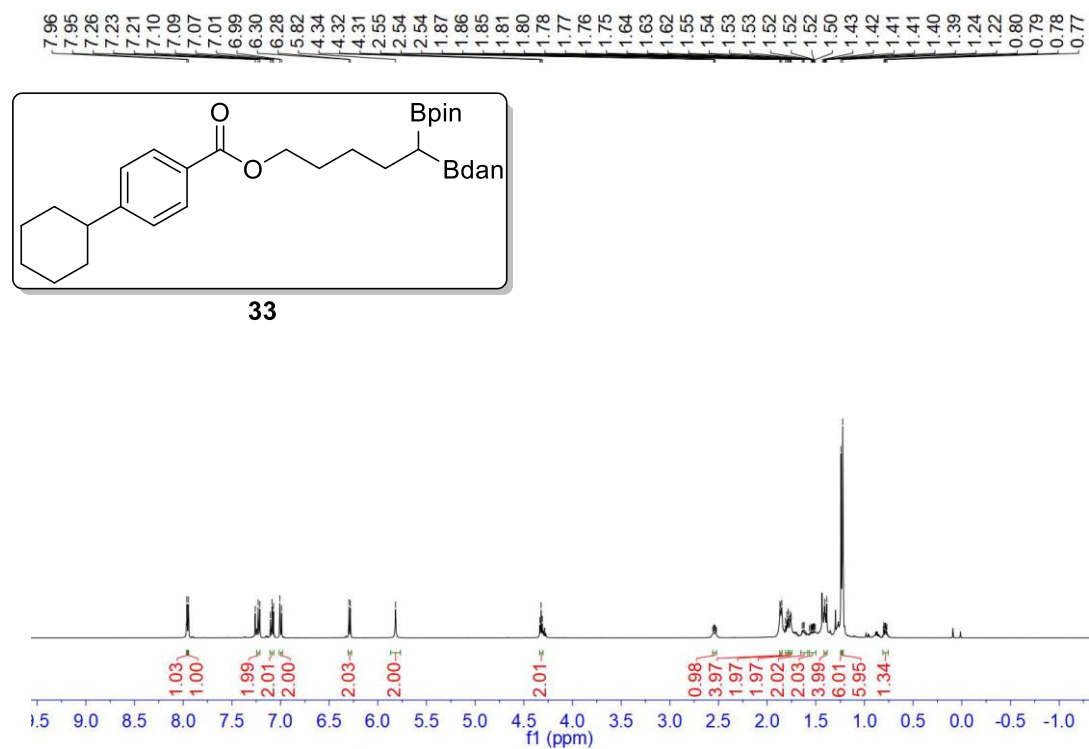

Supplementary Figure 106. <sup>1</sup>H NMR spectrum of compound 33

$^{13}\text{C}$  NMR (126 MHz, room temperature,  $\text{CDCl}_3$ )

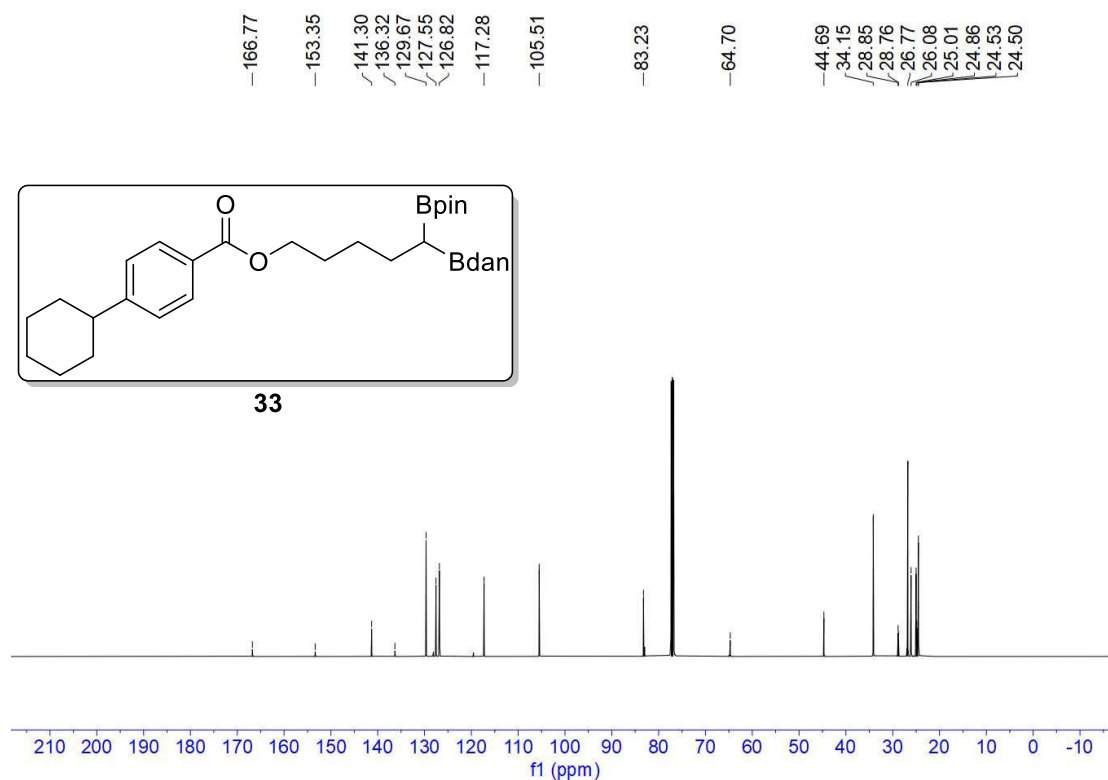

Supplementary Figure 107.  $^{13}\text{C}$  NMR spectrum of compound 33

$^{11}\text{B}$  NMR (160 MHz, room temperature,  $\text{CDCl}_3$ )

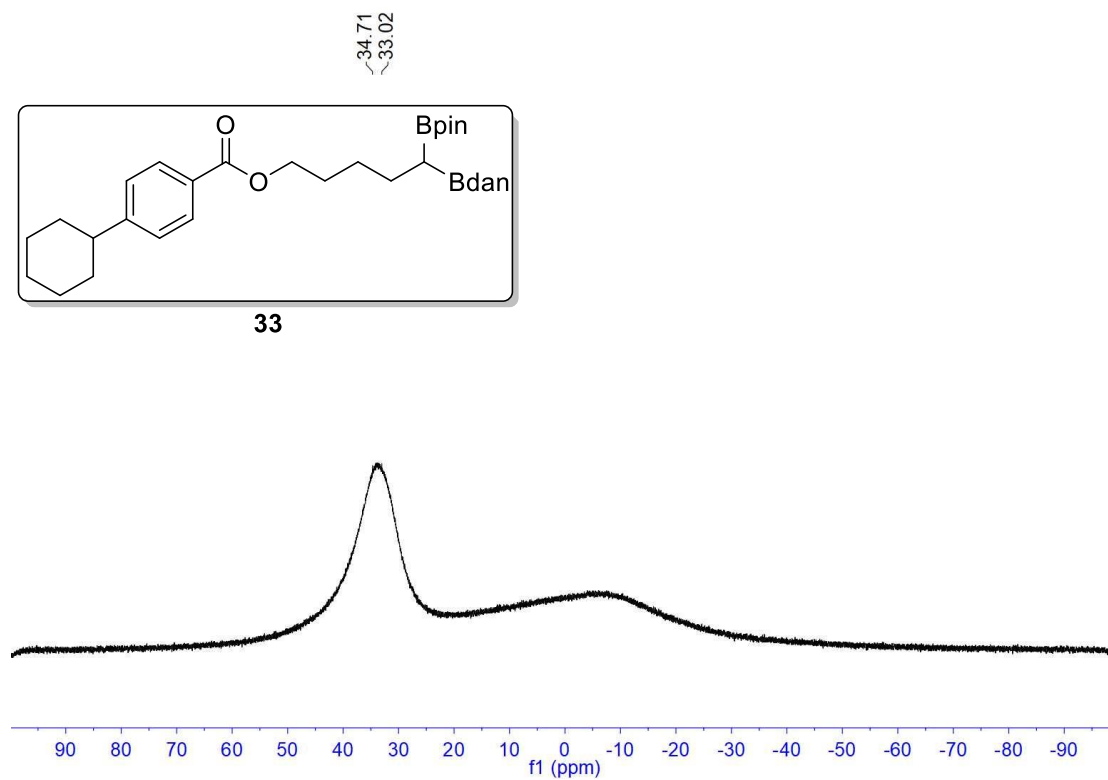

Supplementary Figure 108.  $^{11}\text{B}$  NMR spectrum of compound 33

2-(2-phenyl-1-(4,4,5,5-tetramethyl-1,3,2-dioxaborolan-2-yl)ethyl)ethyl)-2,3-dihydro-1H-naphtho[1,8-de][1,3,2]diazaborinine (34)

$^1\text{H}$  NMR (500 MHz, room temperature,  $\text{CDCl}_3$ )

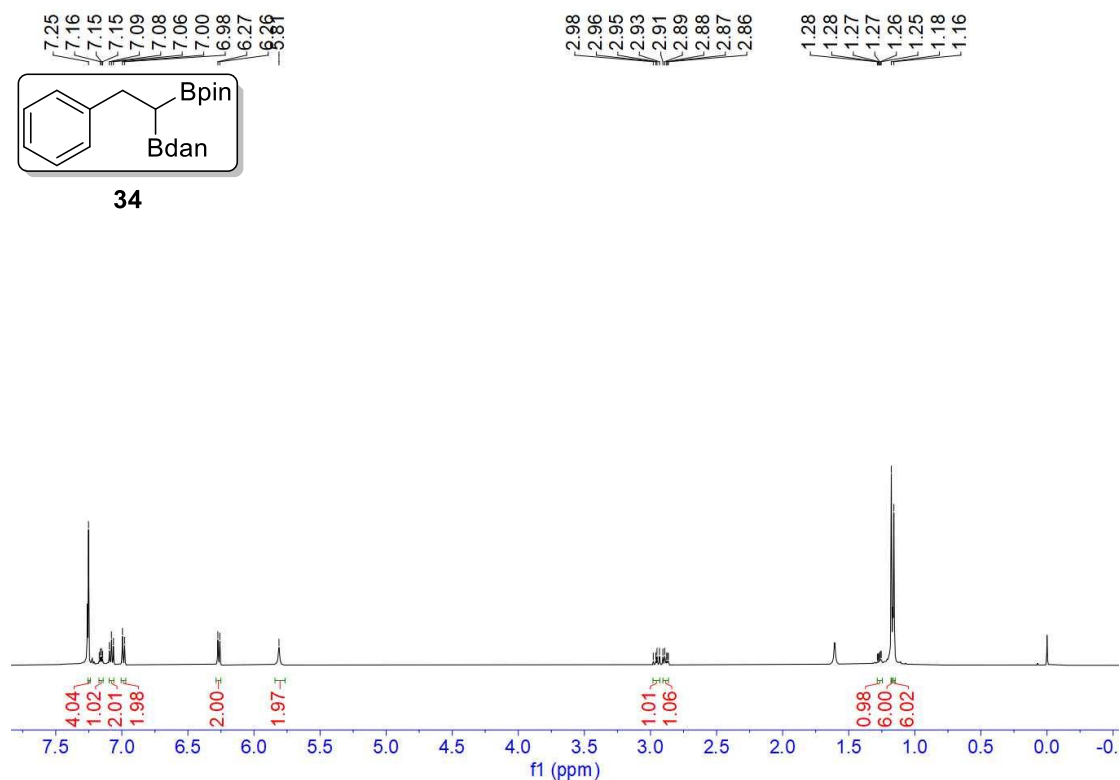

Supplementary Figure 109.  $^1\text{H}$  NMR spectrum of compound 34

$^{13}\text{C}$  NMR (126 MHz, room temperature,  $\text{CDCl}_3$ )

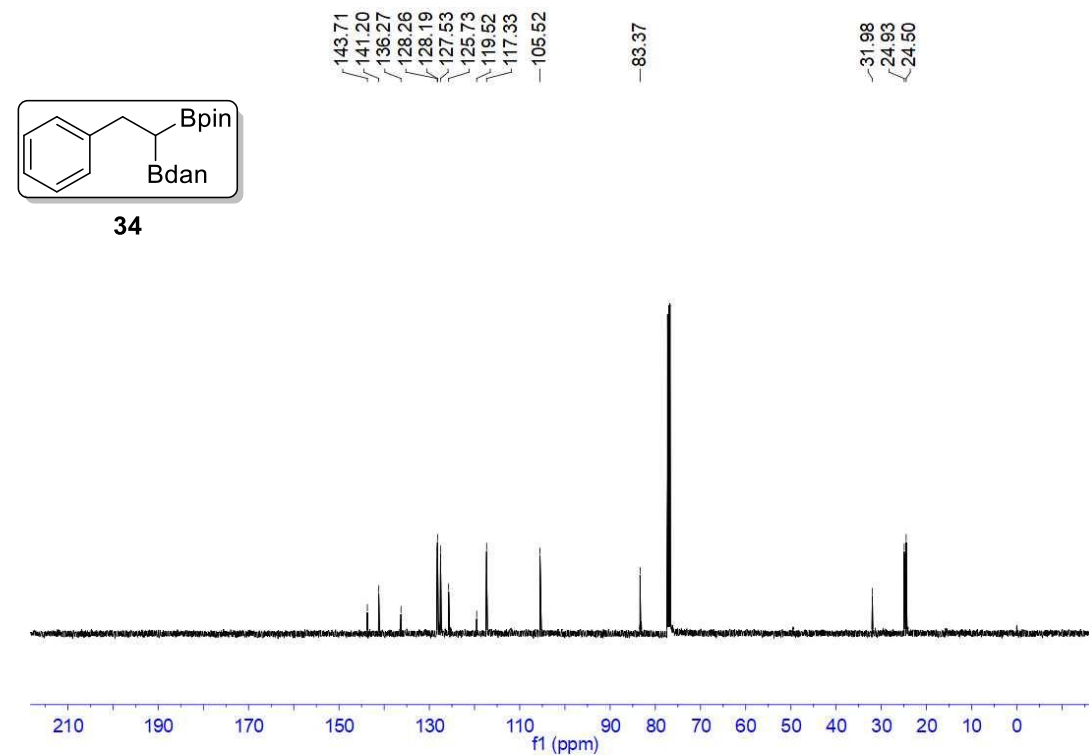

Supplementary Figure 110.  $^{13}\text{C}$  NMR spectrum of compound 34

$^{11}\text{B}$  NMR (160 MHz, room temperature,  $\text{CDCl}_3$ )

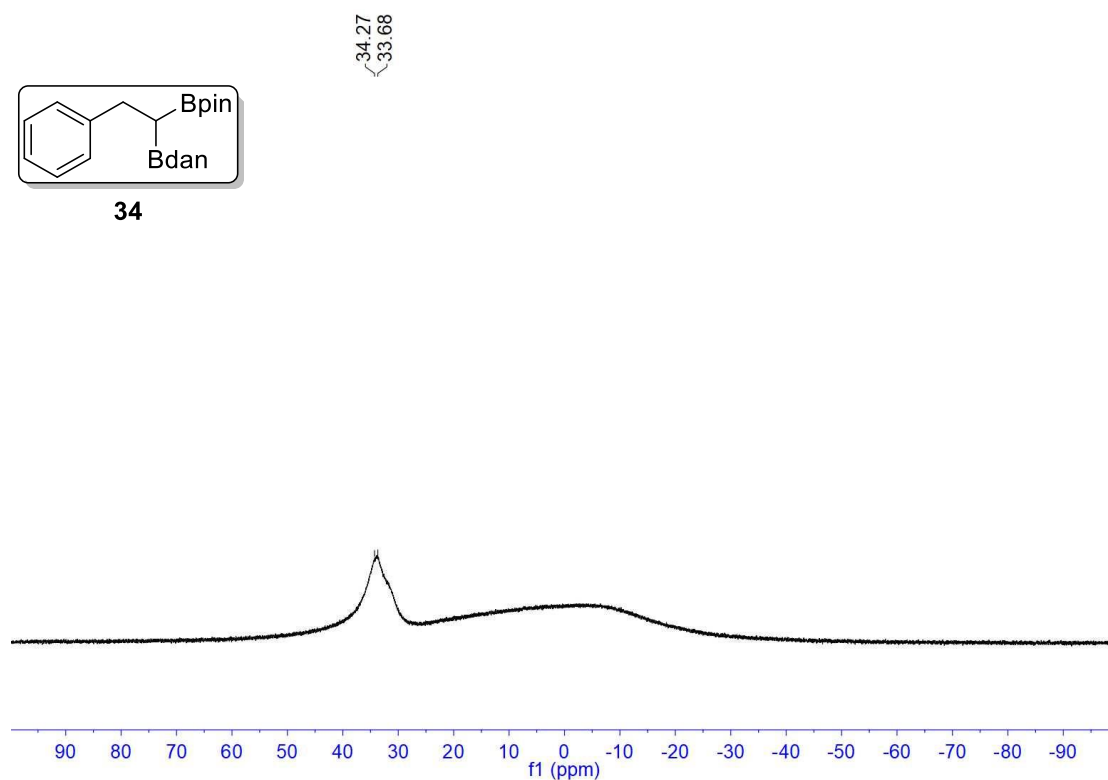

Supplementary Figure 111.  $^{11}\text{B}$  NMR spectrum of compound 34

2-(1-(4,4,5,5-tetramethyl-1,3,2-dioxaborolan-2-yl)-2-(p-tolyl)ethyl)-2,3-dihydro-1H-naphtho[1,8-de][1,3,2]diazaborinine (35)

$^1\text{H}$  NMR (500 MHz, room temperature,  $\text{CDCl}_3$ )

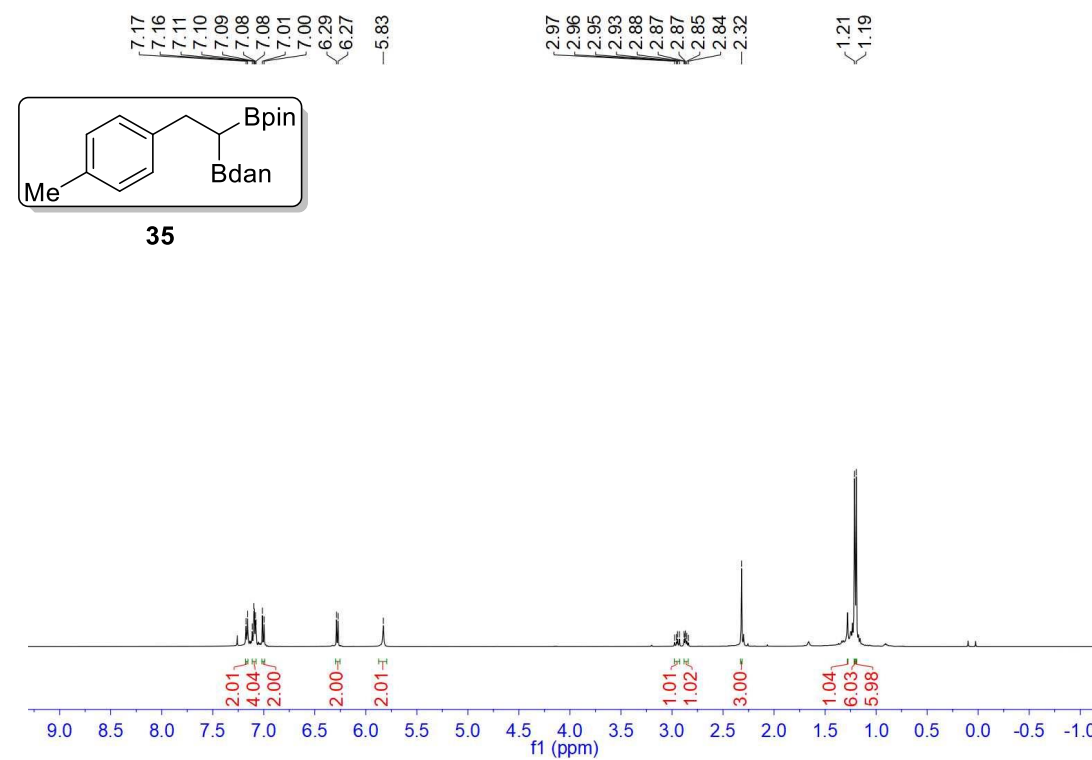

Supplementary Figure 112.  $^1\text{H}$  NMR spectrum of compound 35

$^{13}\text{C}$  NMR (126 MHz, room temperature,  $\text{CDCl}_3$ )

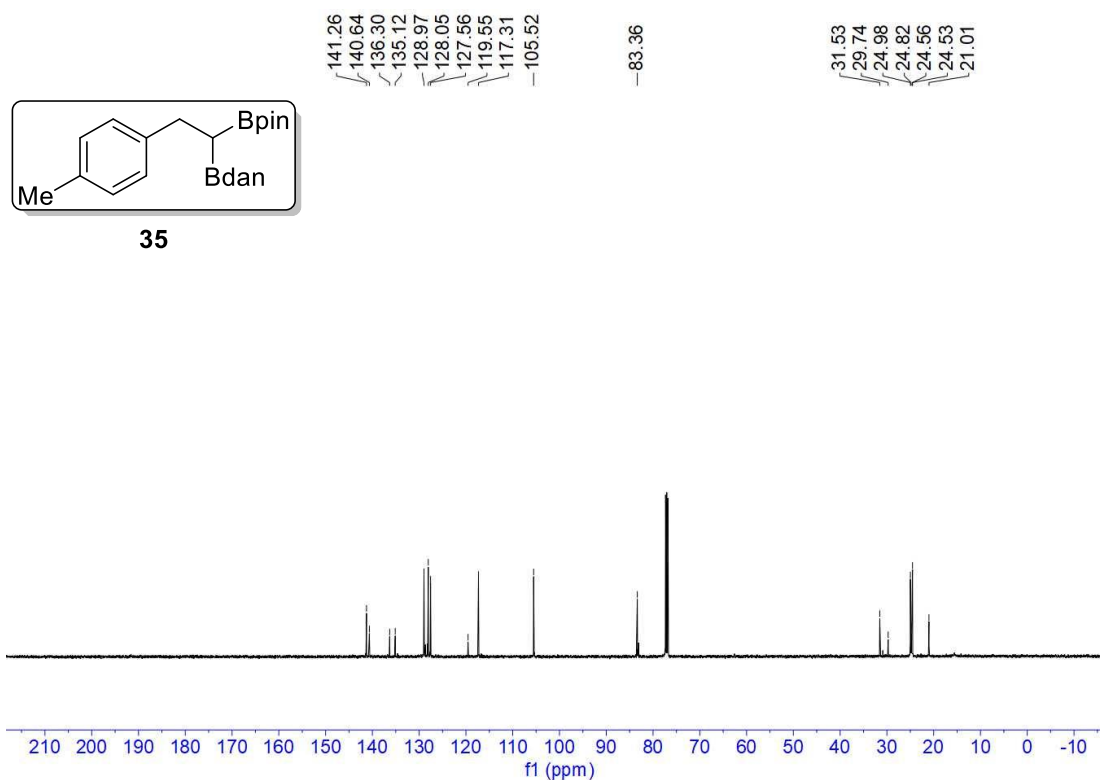

Supplementary Figure 113.  $^{13}\text{C}$  NMR spectrum of compound 35

$^{11}\text{B}$  NMR (160 MHz, room temperature,  $\text{CDCl}_3$ )

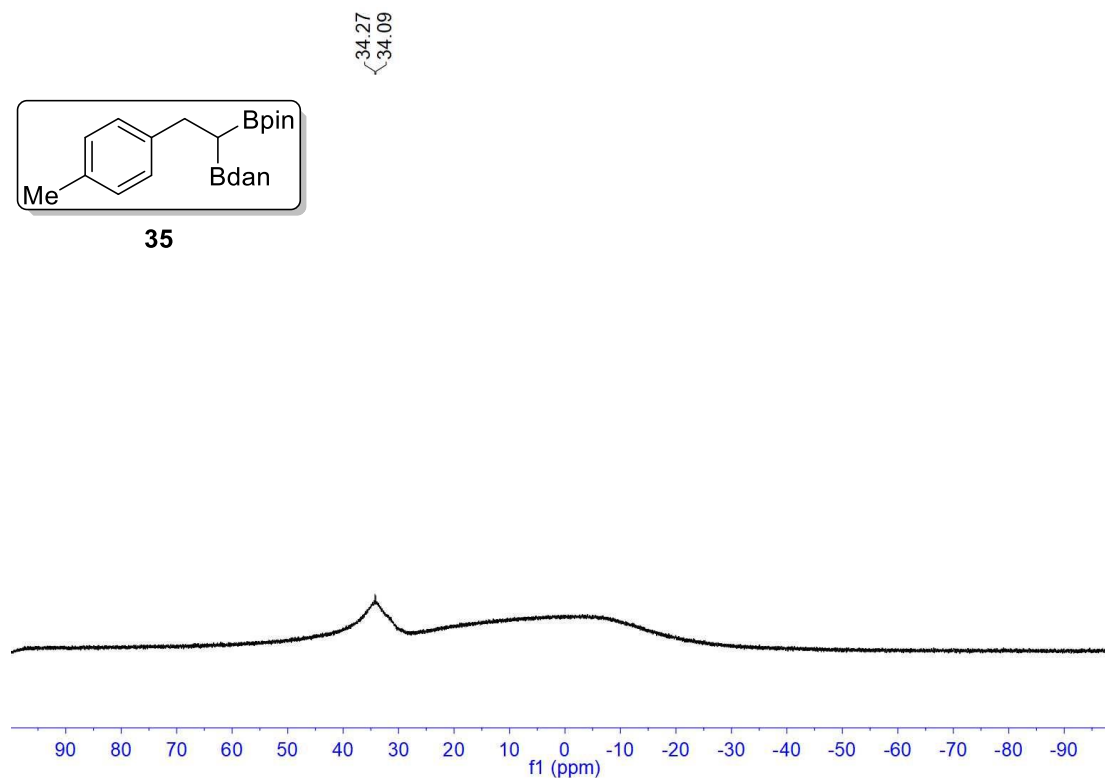

Supplementary Figure 114.  $^{11}\text{B}$  NMR spectrum of compound 35

2-(2-(4-ethylphenyl)-1-(4,4,5,5-tetramethyl-1,3,2-dioxaborolan-2-yl)ethyl)-2,3-dihydro-1H-naphtho[1,8-de][1,3,2]diazaborinine (36)

<sup>1</sup>H NMR (500 MHz, room temperature, CDCl<sub>3</sub>)

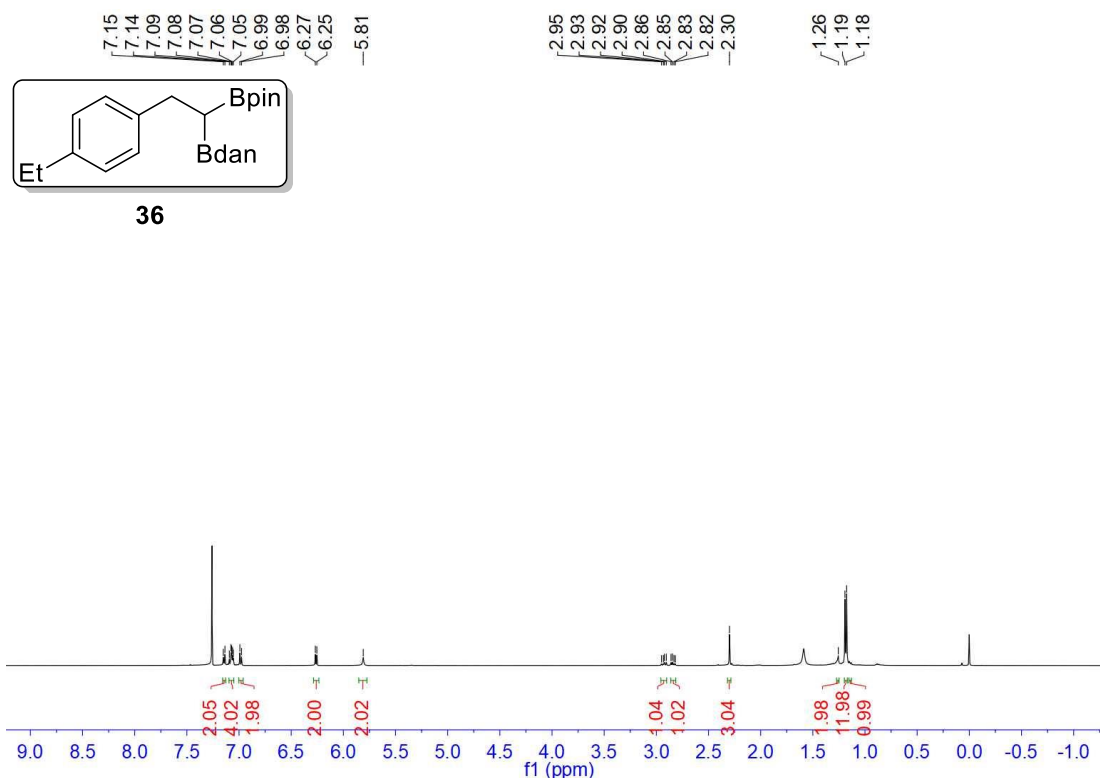

Supplementary Figure 115. <sup>1</sup>H NMR spectrum of compound 36

<sup>13</sup>C NMR (126 MHz, room temperature, CDCl<sub>3</sub>)

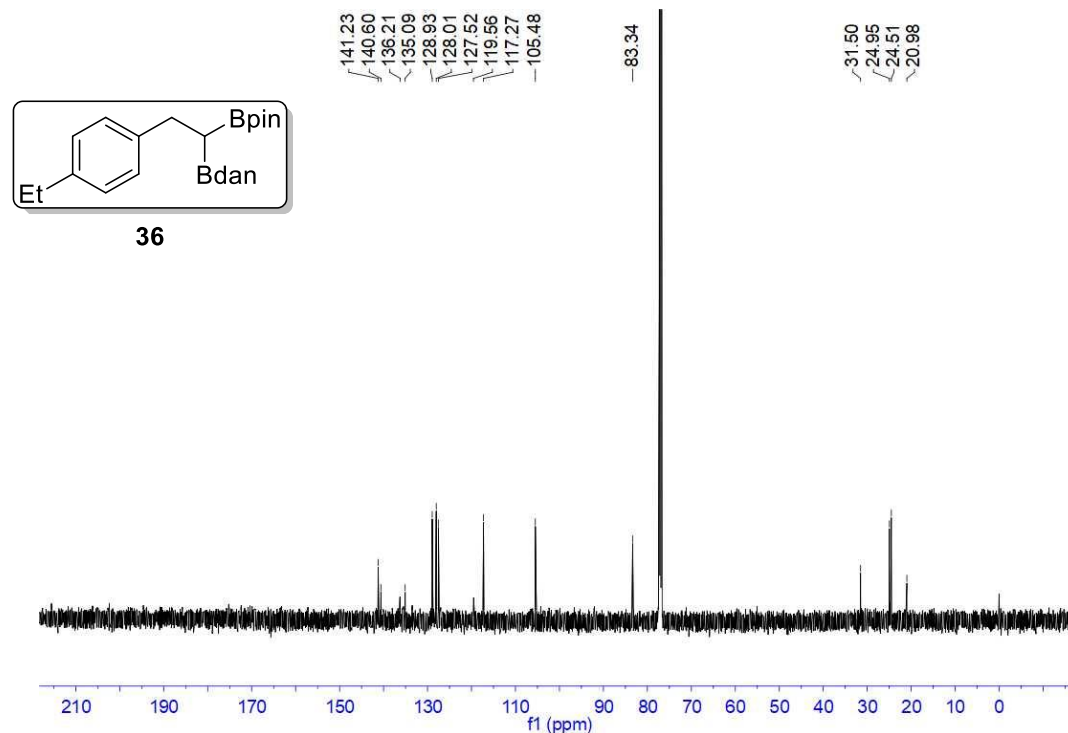

Supplementary Figure 116. <sup>13</sup>C NMR spectrum of compound 36

$^{11}\text{B}$  NMR (160 MHz, room temperature,  $\text{CDCl}_3$ )

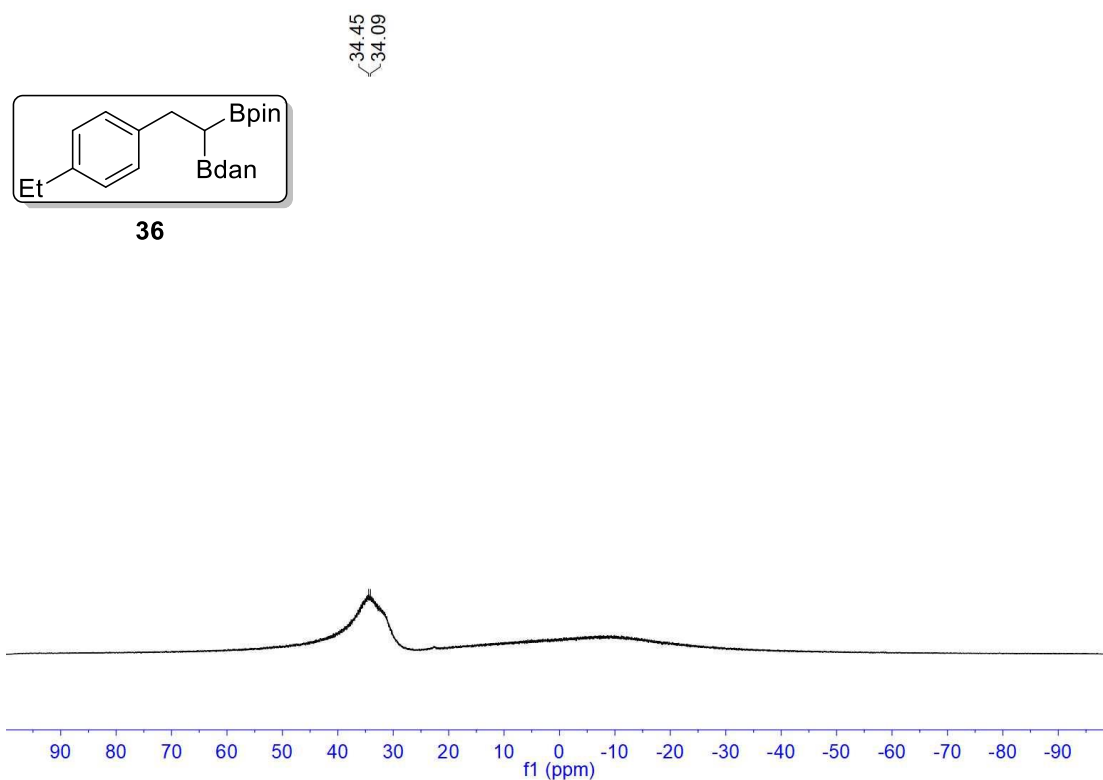

Supplementary Figure 117.  $^{11}\text{B}$  NMR spectrum of compound 36

2-(2-(4-(tert-butyl)phenyl)-1-(4,4,5,5-tetramethyl-1,3,2-dioxaborolan-2-yl)ethyl)-2,3-dihydro-1H-naphtho[1,8-de][1,3,2]diazaborinine (37)

$^1\text{H}$  NMR (500 MHz, room temperature,  $\text{CDCl}_3$ )

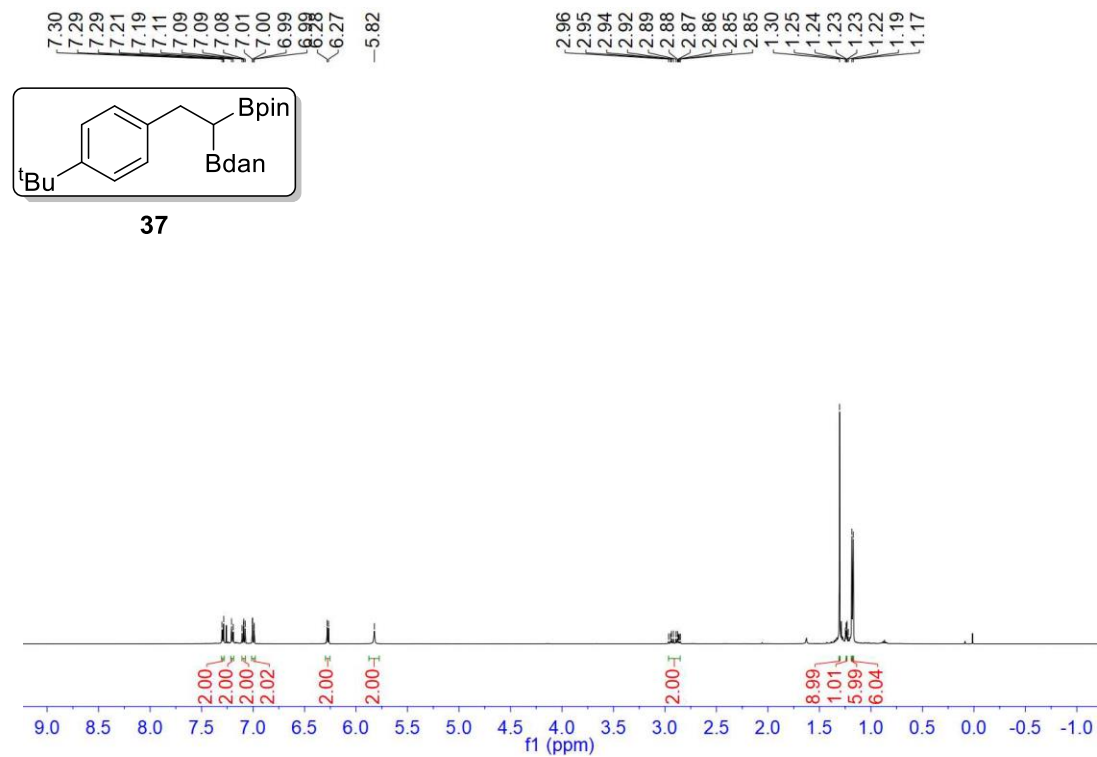

Supplementary Figure 118.  $^1\text{H}$  NMR spectrum of compound 37

$^{13}\text{C}$  NMR (126 MHz, room temperature,  $\text{CDCl}_3$ )

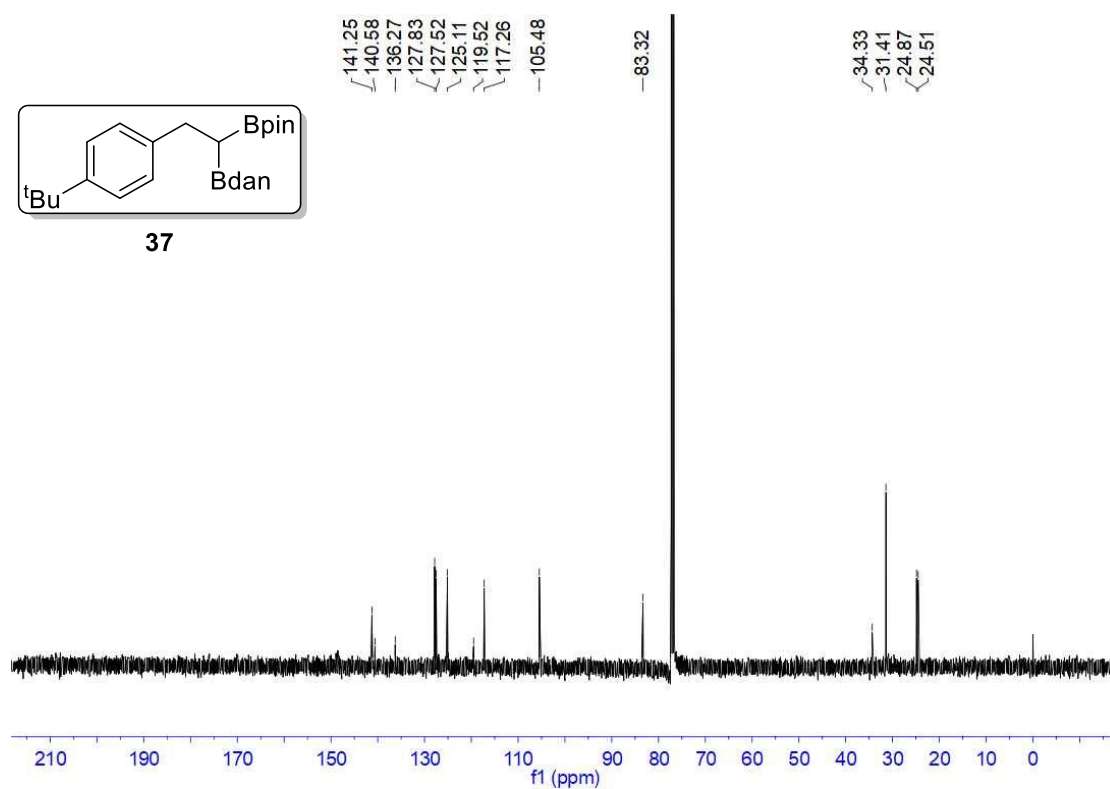

Supplementary Figure 119.  $^{13}\text{C}$  NMR spectrum of compound **37**

$^{11}\text{B}$  NMR (160 MHz, room temperature,  $\text{CDCl}_3$ )

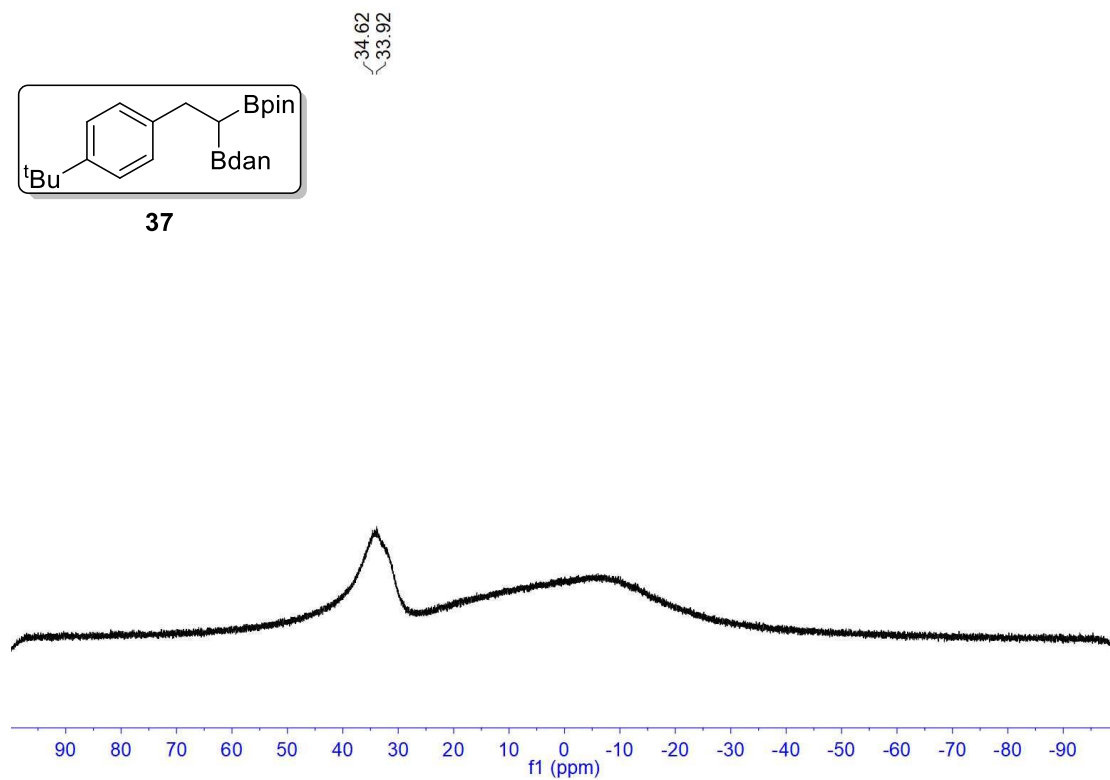

Supplementary Figure 120.  $^{11}\text{B}$  NMR spectrum of compound **37**



2-(2-(4-isopropylphenyl)-1-(4,4,5,5-tetramethyl-1,3,2-dioxaborolan-2-yl)ethyl)-2,3-dihydro-1H-naphtho[1,8-de][1,3,2]diazaborinine (38)

<sup>1</sup>H NMR (500 MHz, room temperature, CDCl<sub>3</sub>)

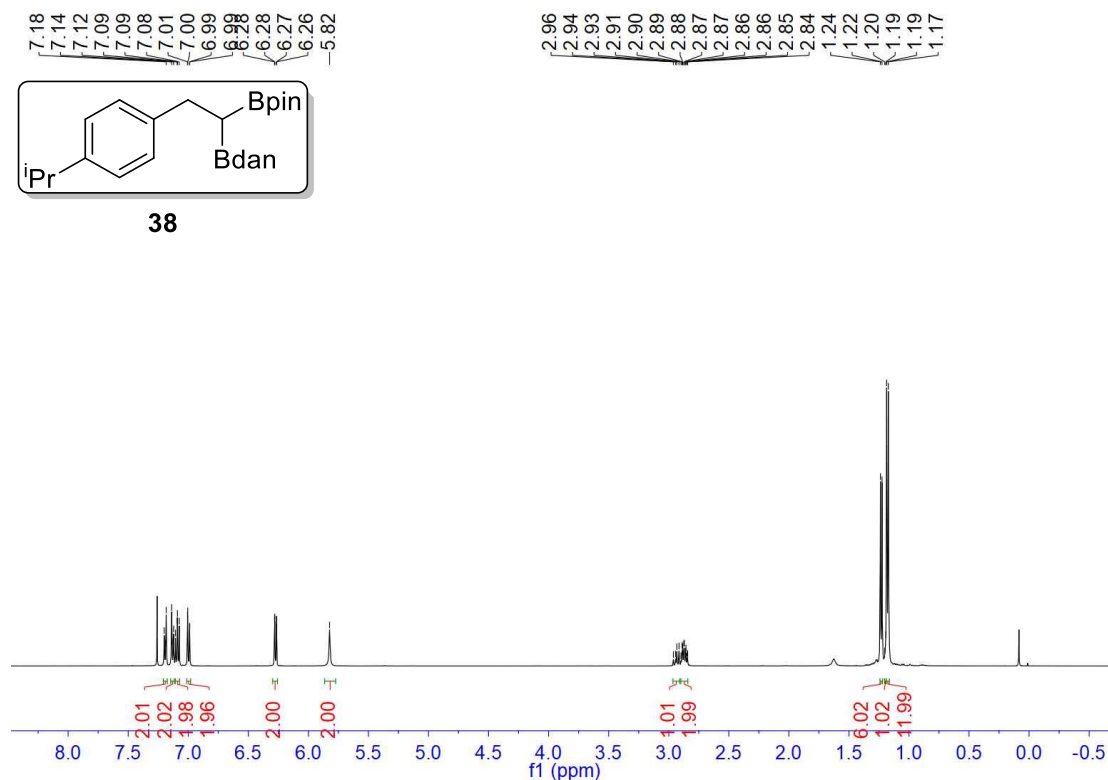

Supplementary Figure 121. <sup>1</sup>H NMR spectrum of compound 38

<sup>13</sup>C NMR (126 MHz, room temperature, CDCl<sub>3</sub>)

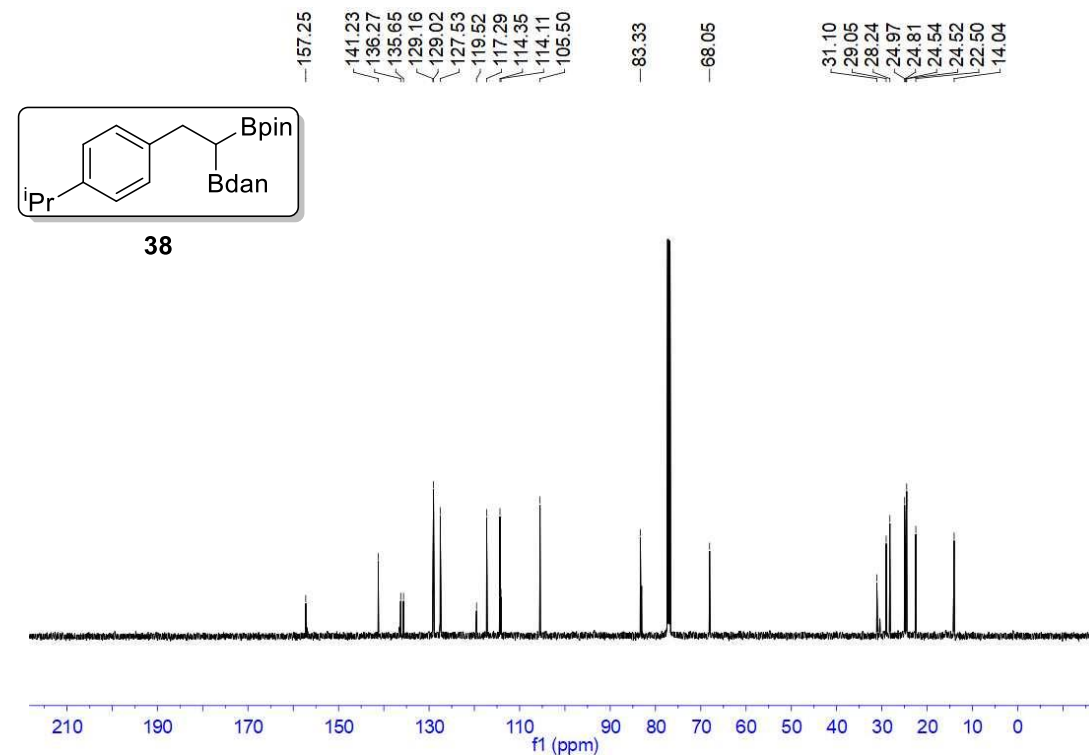

Supplementary Figure 122. <sup>13</sup>C NMR spectrum of compound 38

$^{11}\text{B}$  NMR (160 MHz, room temperature,  $\text{CDCl}_3$ )

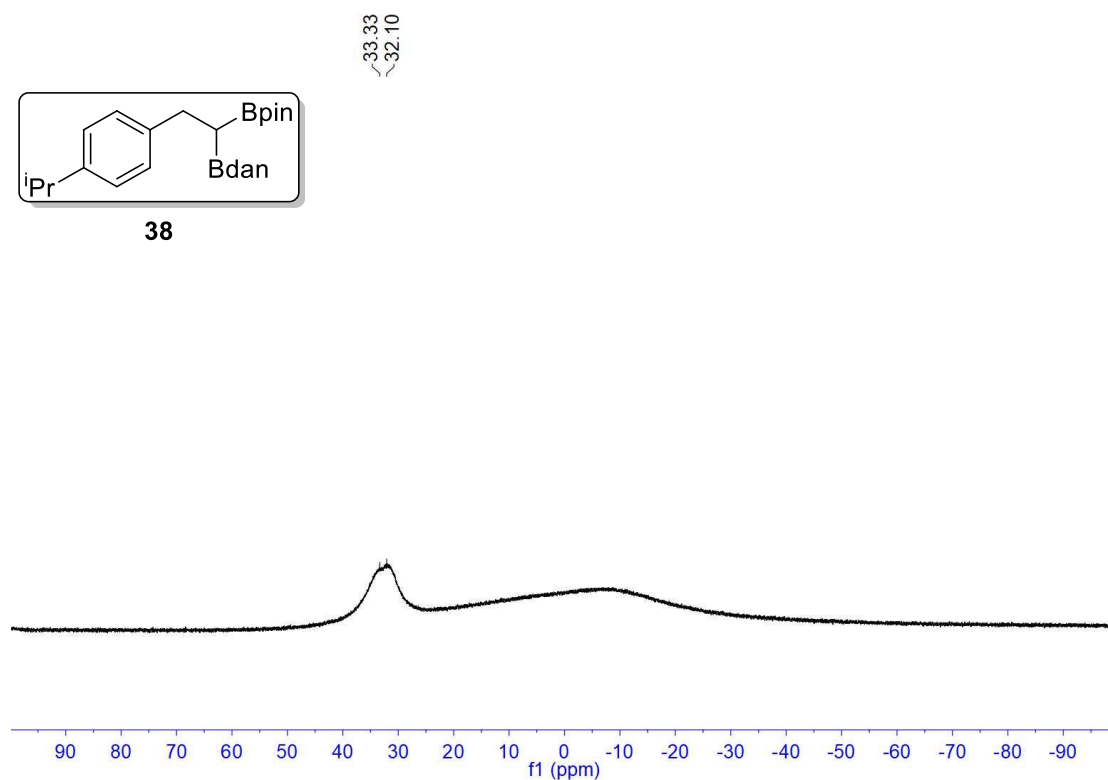

38

Supplementary Figure 123.  $^{11}\text{B}$  NMR spectrum of compound 38

2-(2-(4-butylphenyl)-1-(4,4,5,5-tetramethyl-1,3,2-dioxaborolan-2-yl)ethyl)-2,3-dihydro-1H-naphtho[1,8-de][1,3,2]diazaborinine (39)

$^1\text{H}$  NMR (500 MHz, room temperature,  $\text{CDCl}_3$ )

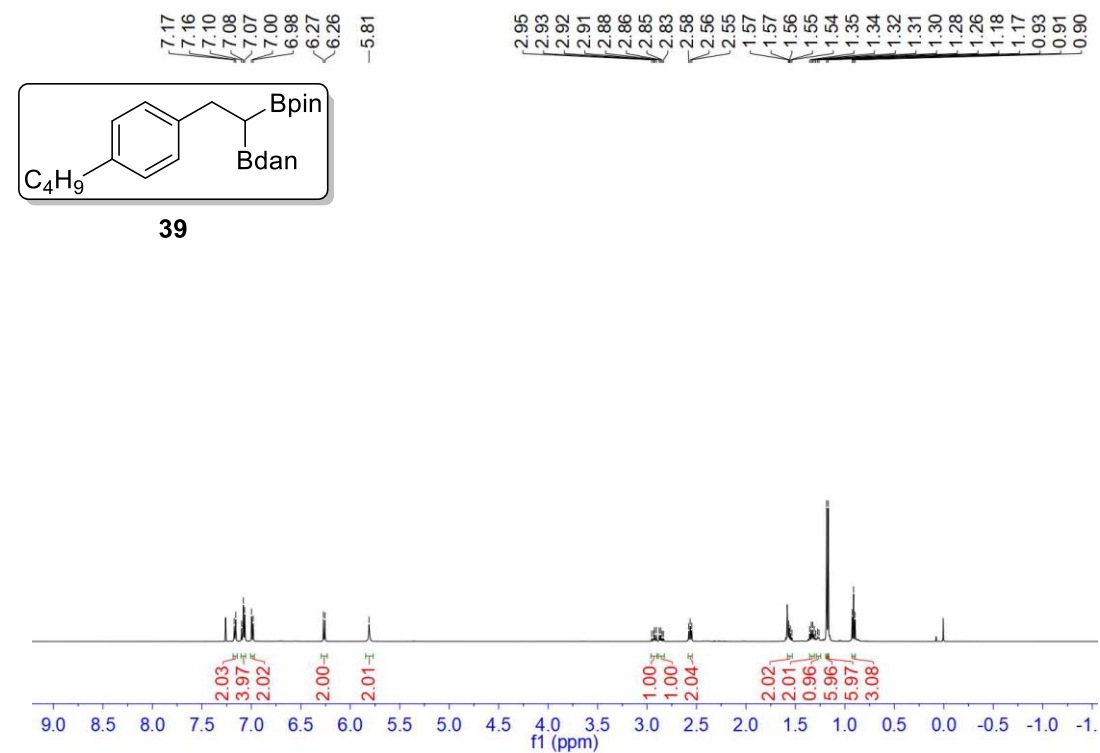

39

Supplementary Figure 124.  $^1\text{H}$  NMR spectrum of compound 39

$^{13}\text{C}$  NMR (126 MHz, room temperature,  $\text{CDCl}_3$ )

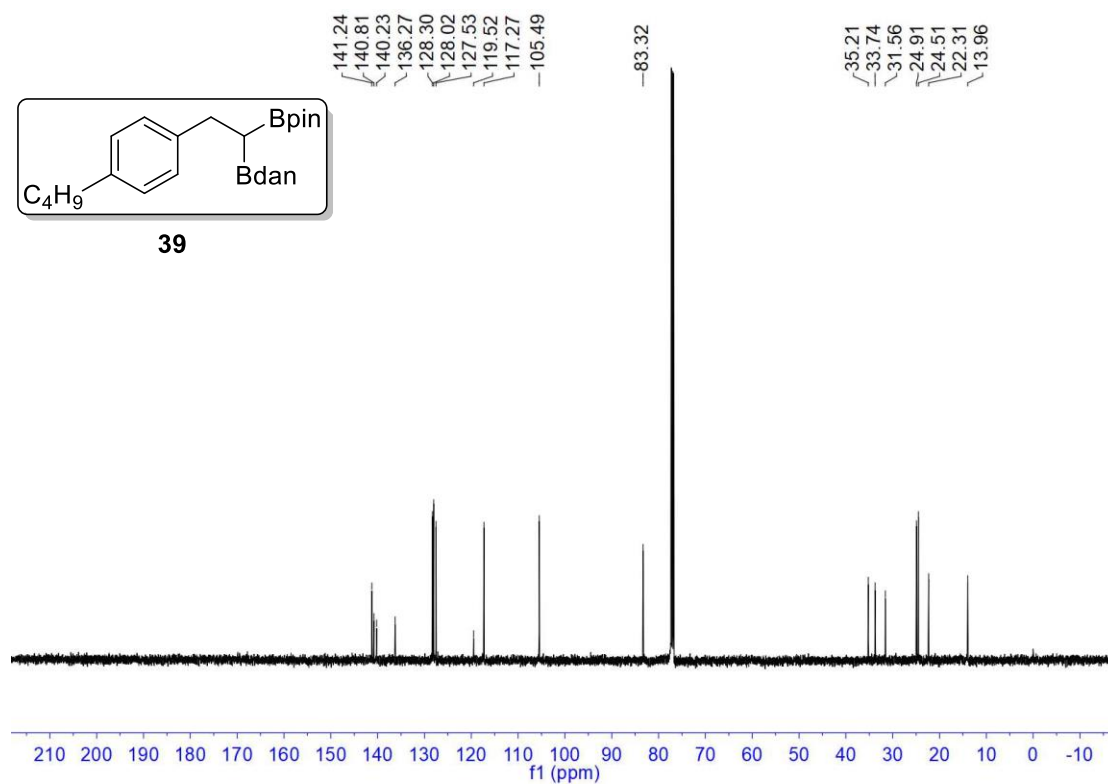

Supplementary Figure 125.  $^{13}\text{C}$  NMR spectrum of compound 39

$^{11}\text{B}$  NMR (160 MHz, room temperature,  $\text{CDCl}_3$ )

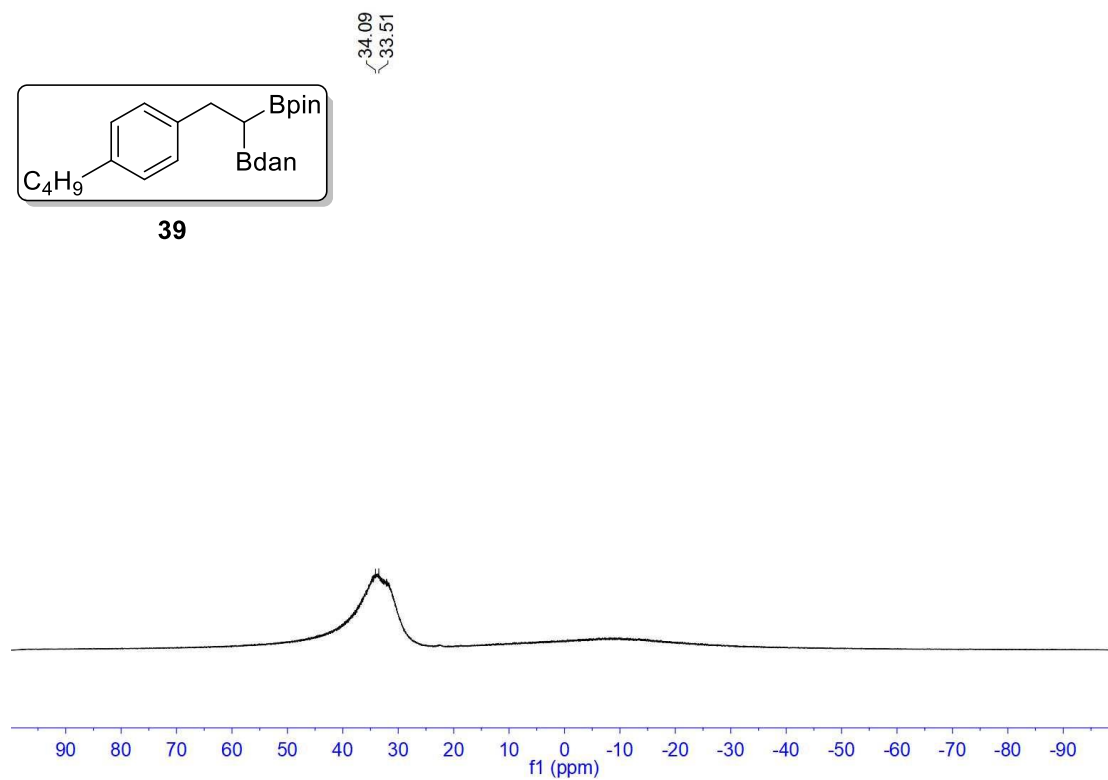

Supplementary Figure 126.  $^{11}\text{B}$  NMR spectrum of compound 39

**2-(2-(4-propylphenyl)-1-(4,4,5,5-tetramethyl-1,3,2-dioxaborolan-2-yl)ethyl)-2,3-dihydro-1H-naphtho[1,8-de][1,3,2]diazaborinine (40)**

**<sup>1</sup>H NMR (500 MHz, room temperature, CDCl<sub>3</sub>)**

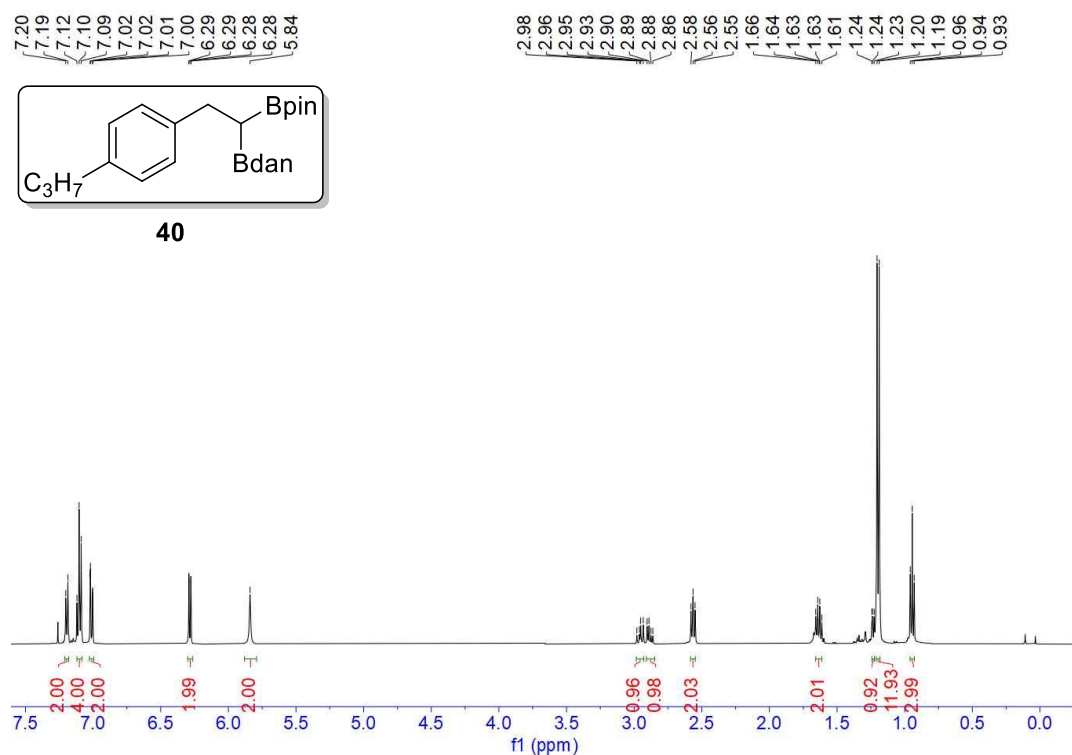

Supplementary Figure 127. <sup>1</sup>H NMR spectrum of compound 40

**<sup>13</sup>C NMR (126 MHz, room temperature, CDCl<sub>3</sub>)**

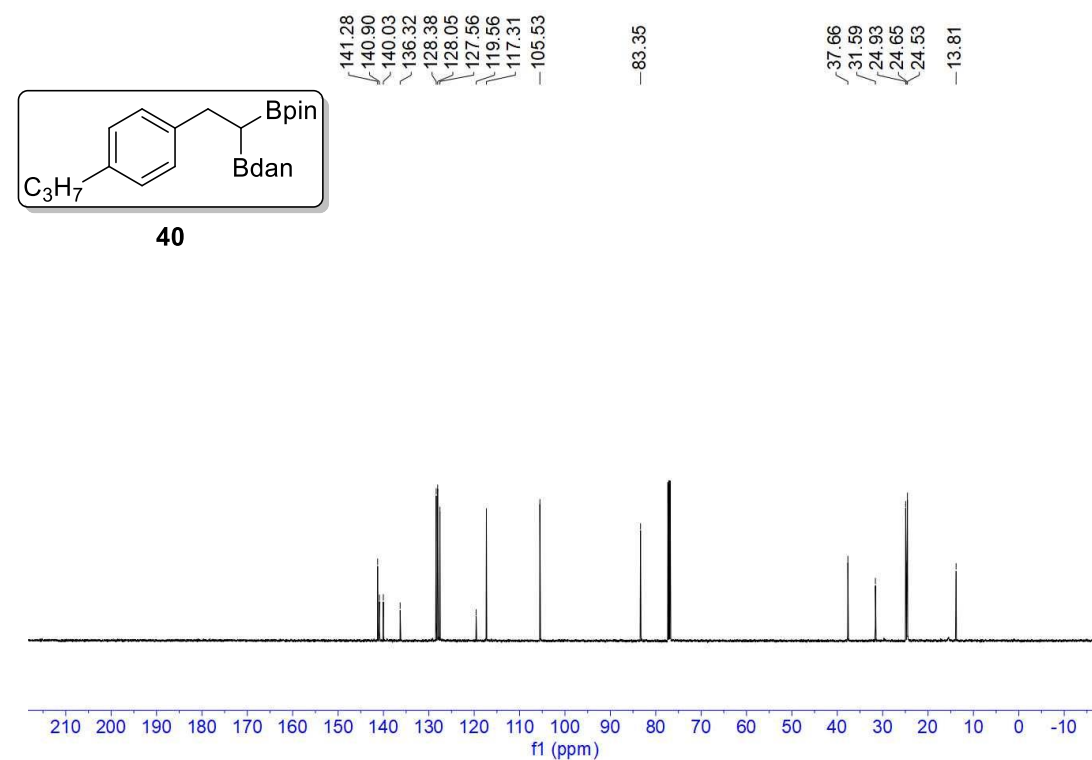

Supplementary Figure 128. <sup>13</sup>C NMR spectrum of compound 40

**<sup>11</sup>B NMR (160 MHz, room temperature, CDCl<sub>3</sub>)**

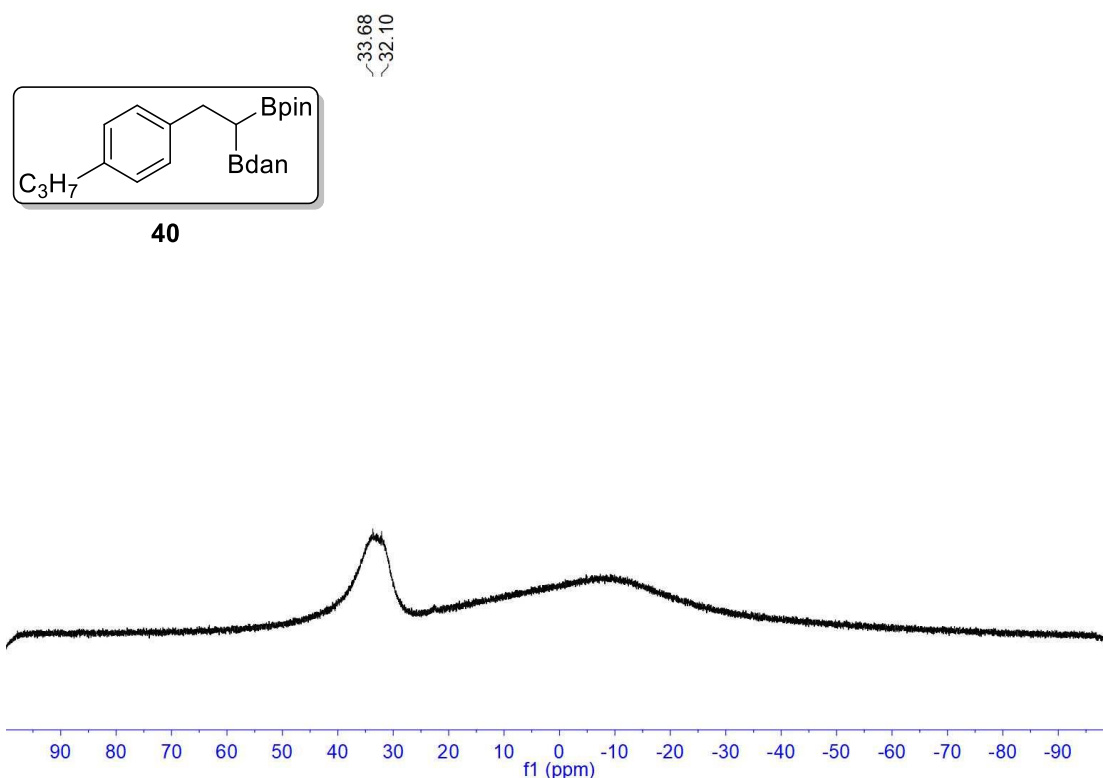

**40**

**Supplementary Figure 129. <sup>11</sup>B NMR spectrum of compound 40**

**2-(2-([1,1'-biphenyl]-4-yl)-1-(4,4,5,5-tetramethyl-1,3,2-dioxaborolan-2-yl)ethyl)-2,3-dihydro-1H-naphtho[1,8-de][1,3,2]diazaborinine (41)**

**<sup>1</sup>H NMR (500 MHz, room temperature, CDCl<sub>3</sub>)**

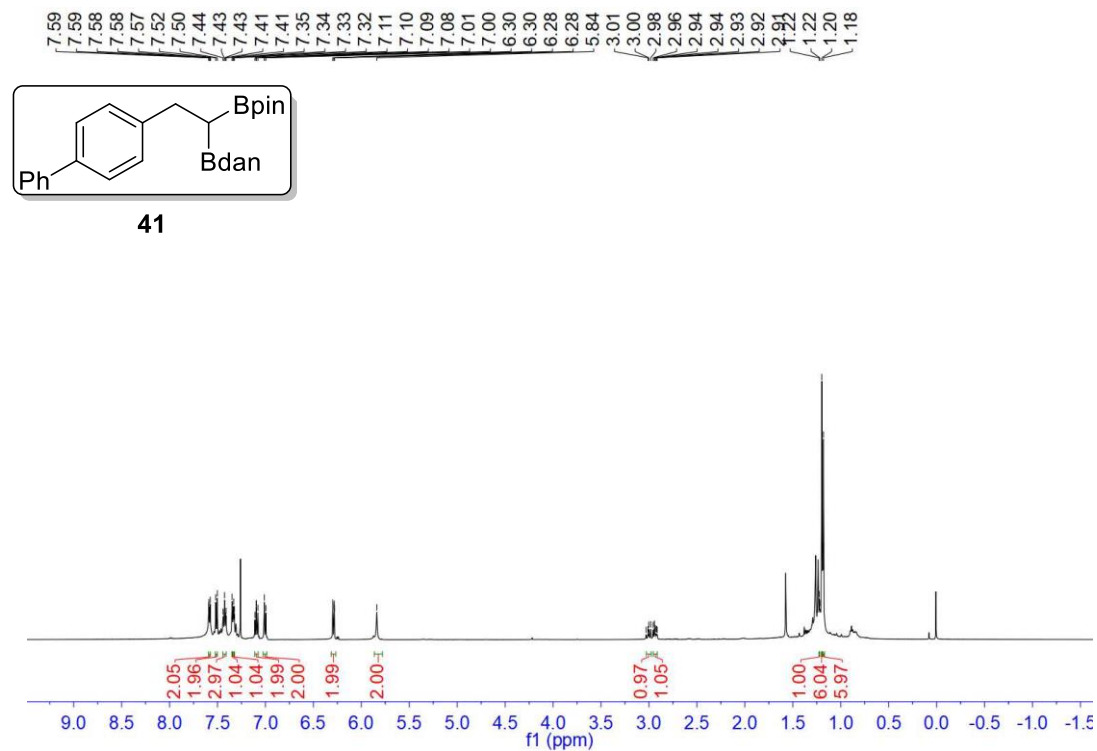

**41**

**Supplementary Figure 130. <sup>1</sup>H NMR spectrum of compound 41**

**<sup>13</sup>C NMR (126 MHz, room temperature, CDCl<sub>3</sub>)**

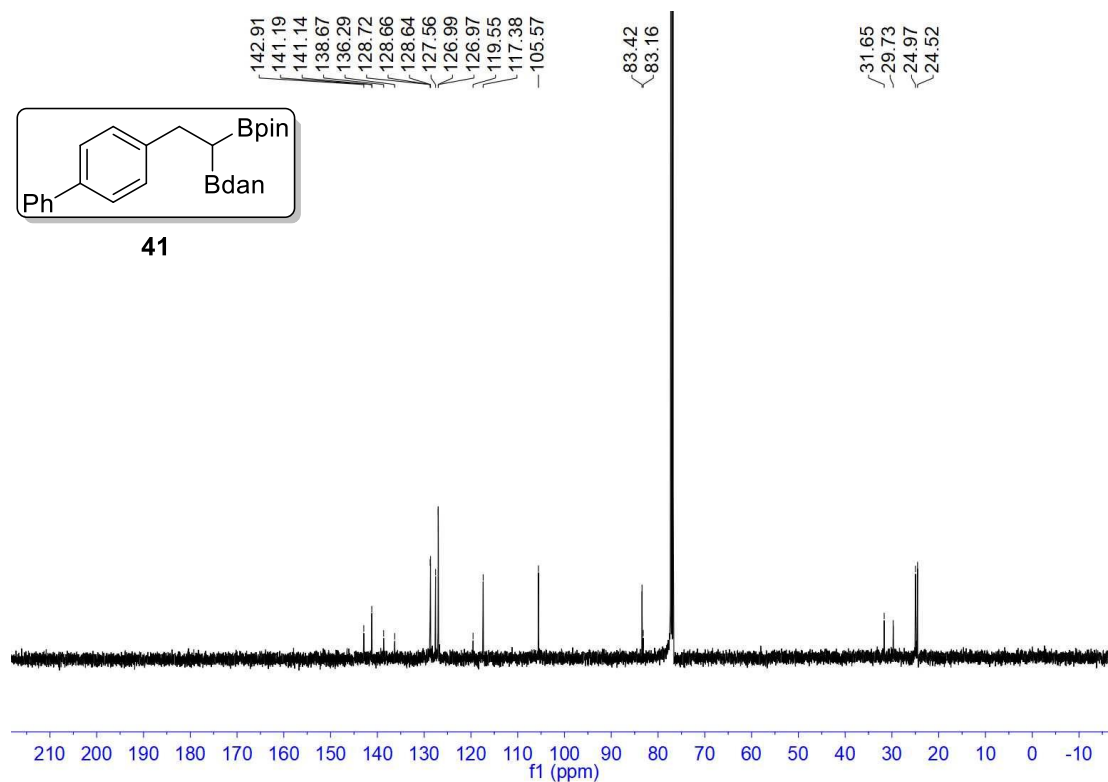

Supplementary Figure 131. <sup>13</sup>C NMR spectrum of compound 41

**<sup>11</sup>B NMR (160 MHz, room temperature, CDCl<sub>3</sub>)**

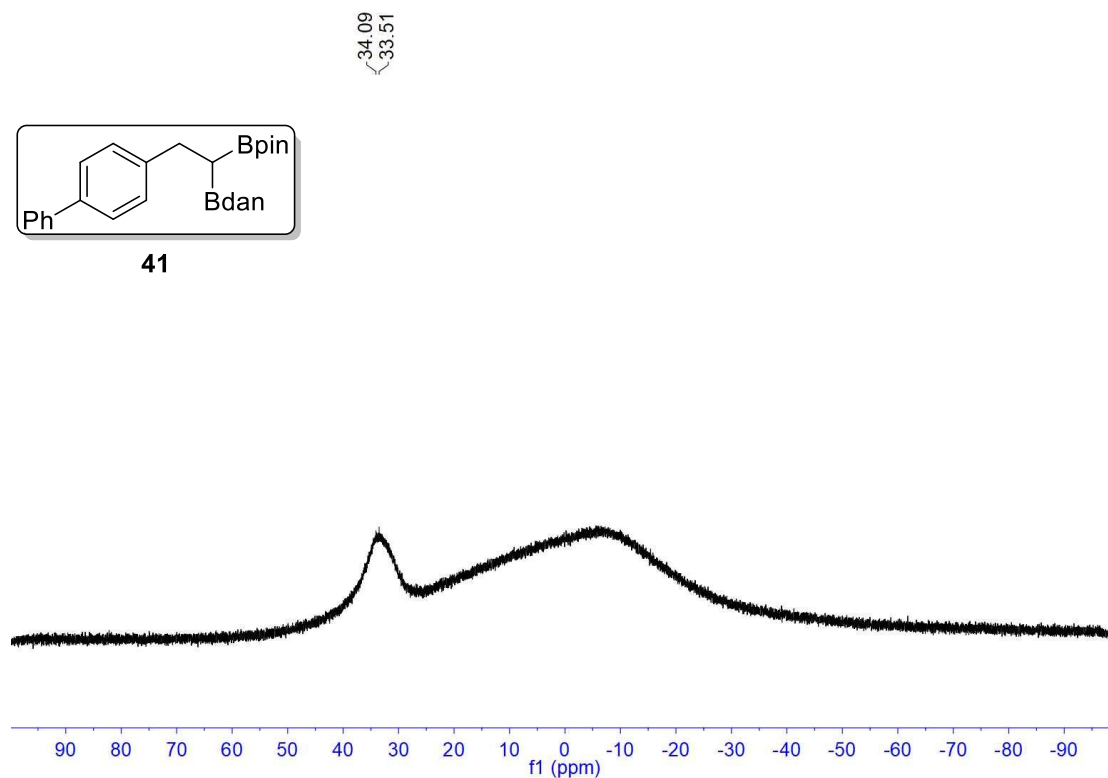

Supplementary Figure 132. <sup>11</sup>B NMR spectrum of compound 41

2-(2-(4-methoxyphenyl)-1-(4,4,5,5-tetramethyl-1,3,2-dioxaborolan-2-yl)ethyl)-2,3-dihydro-1H-naphtho[1,8-de][1,3,2]diazaborinine (42)

$^1\text{H}$  NMR (500 MHz, room temperature,  $\text{CDCl}_3$ )

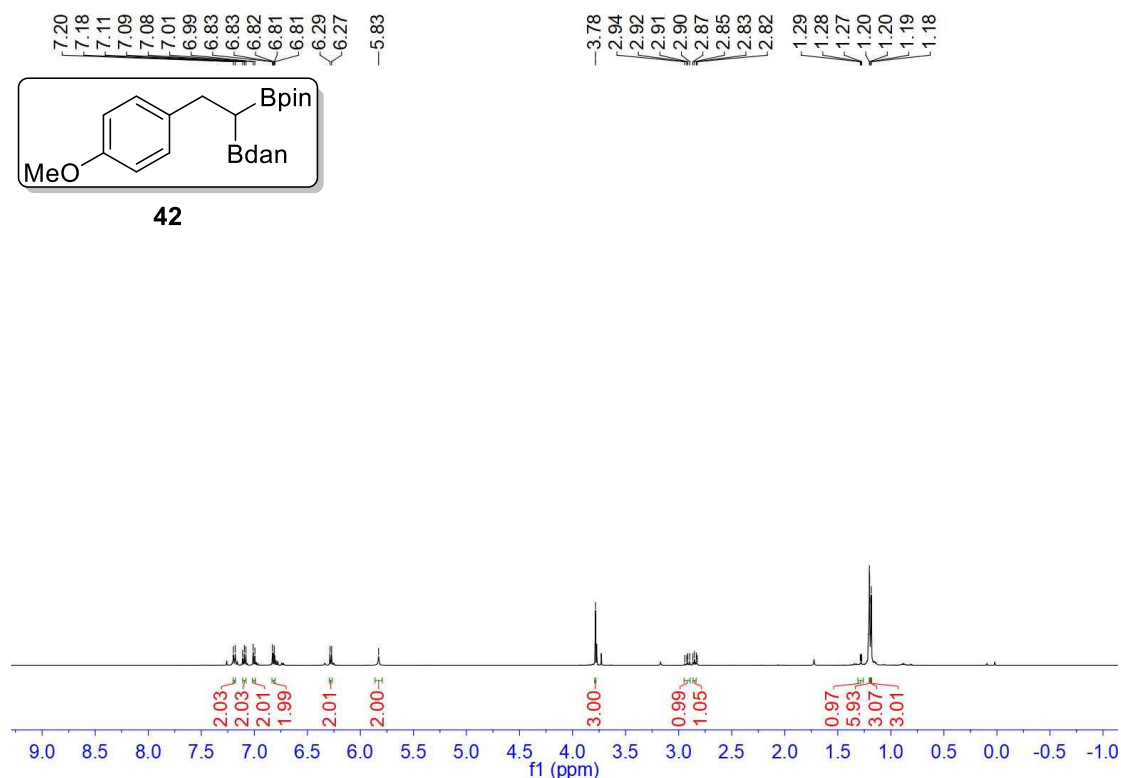

Supplementary Figure 133.  $^1\text{H}$  NMR spectrum of compound 42

$^{13}\text{C}$  NMR (126 MHz, room temperature,  $\text{CDCl}_3$ )

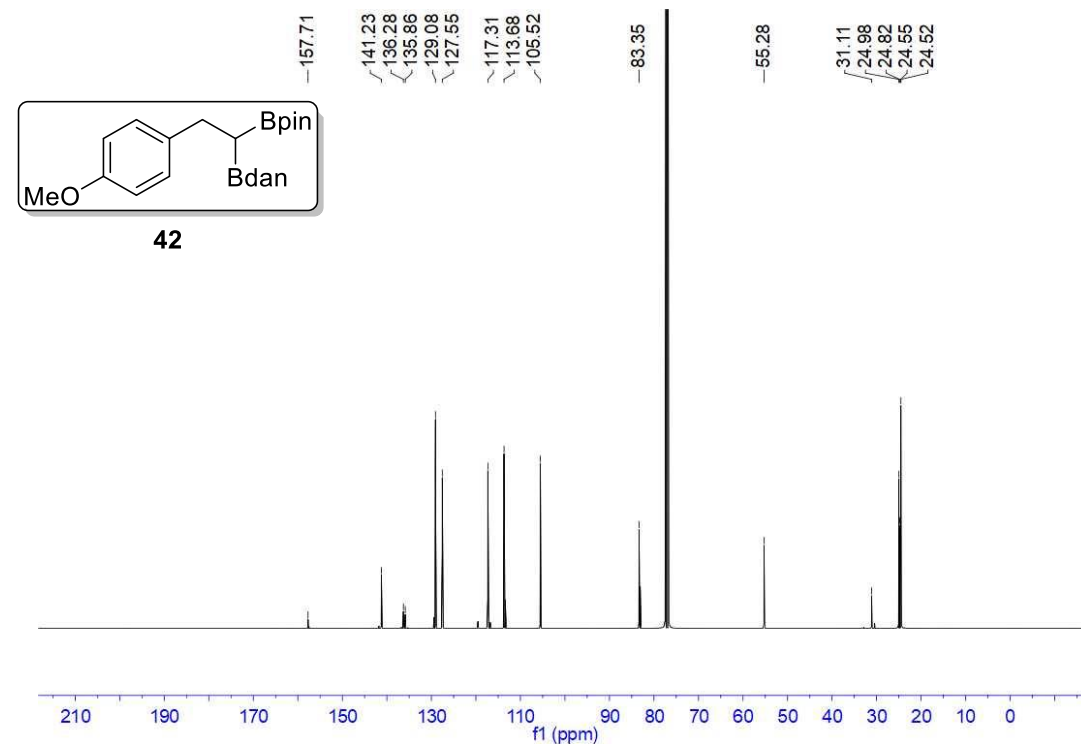

Supplementary Figure 134.  $^{13}\text{C}$  NMR spectrum of compound 42

**<sup>11</sup>B NMR (160 MHz, room temperature, CDCl<sub>3</sub>)**

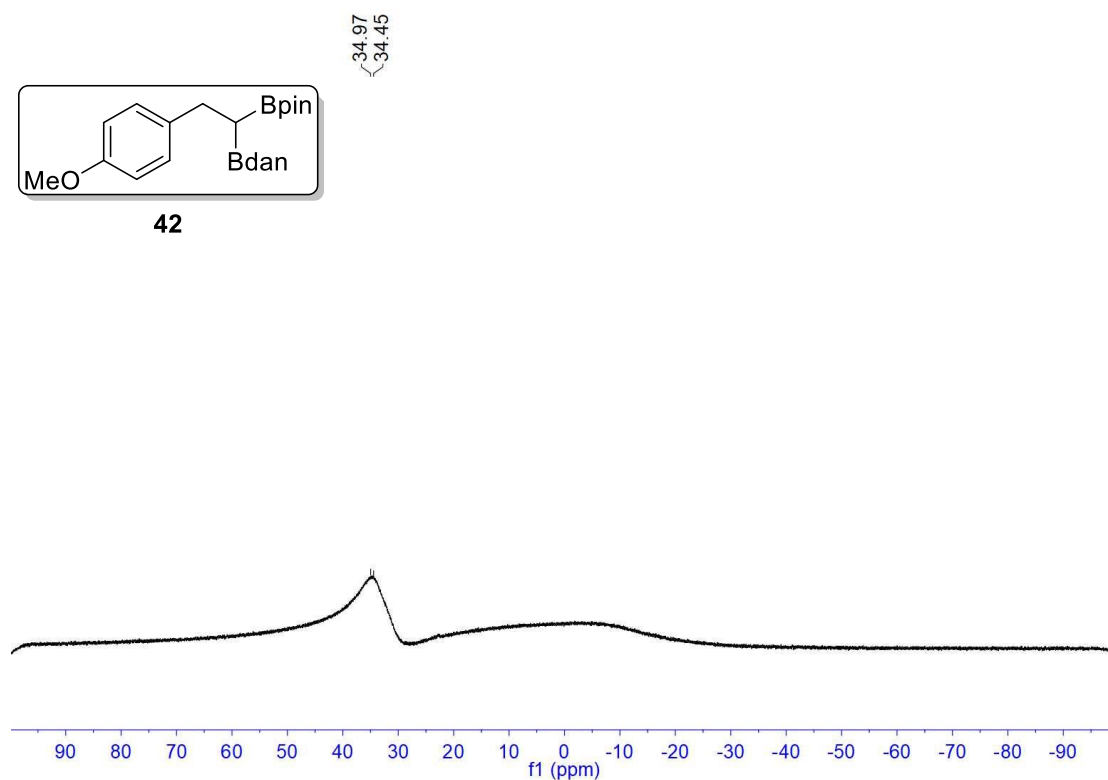

**Supplementary Figure 135. <sup>11</sup>B NMR spectrum of compound 42**

**2-(2-(3-methoxyphenyl)-1-(4,4,5,5-tetramethyl-1,3,2-dioxaborolan-2-yl)ethyl)-2,3-dihydro-1H-naphtho[1,8-de][1,3,2]diazaborinine (43)**

**<sup>1</sup>H NMR (500 MHz, room temperature, CDCl<sub>3</sub>)**

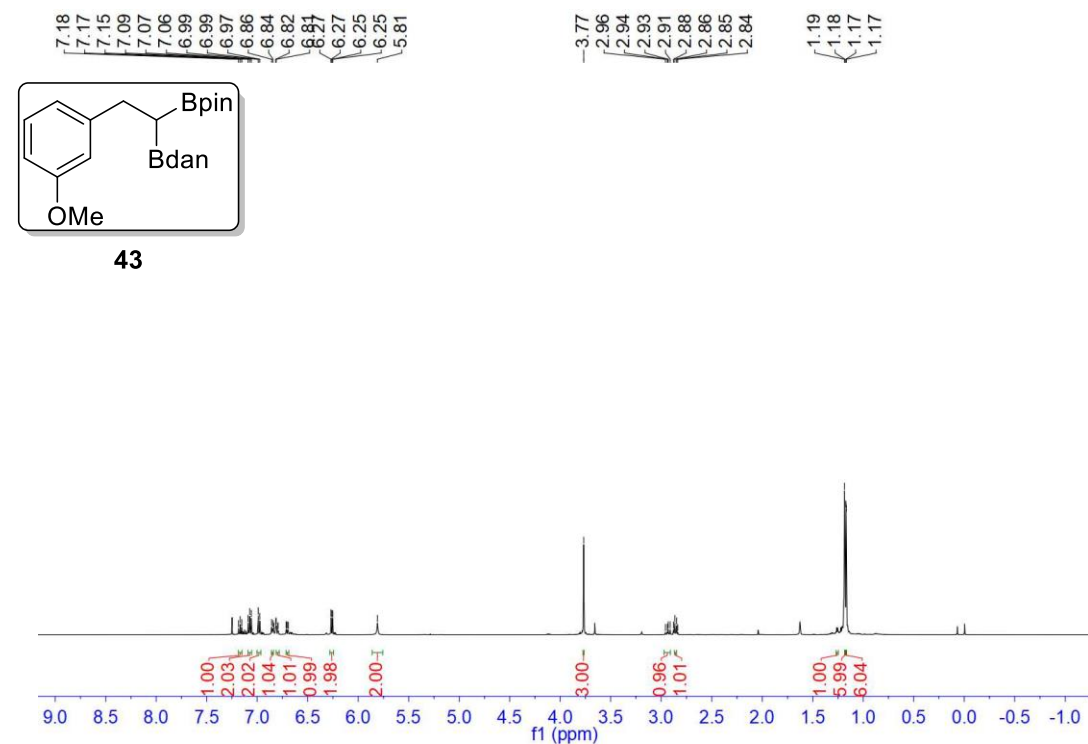

**Supplementary Figure 136. <sup>1</sup>H NMR spectrum of compound 43**



**$^{13}\text{C}$  NMR (126 MHz, room temperature,  $\text{CDCl}_3$ )**

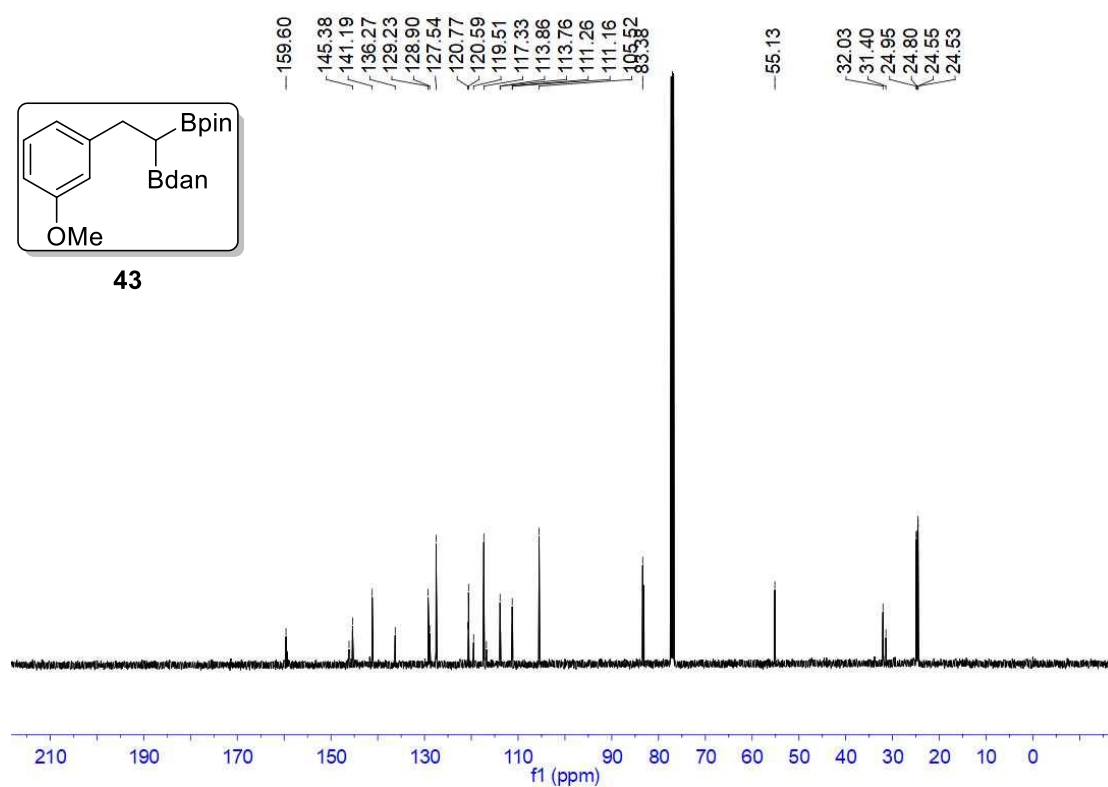

Supplementary Figure 137.  $^{13}\text{C}$  NMR spectrum of compound 43

**$^{11}\text{B}$  NMR (160 MHz, room temperature,  $\text{CDCl}_3$ )**

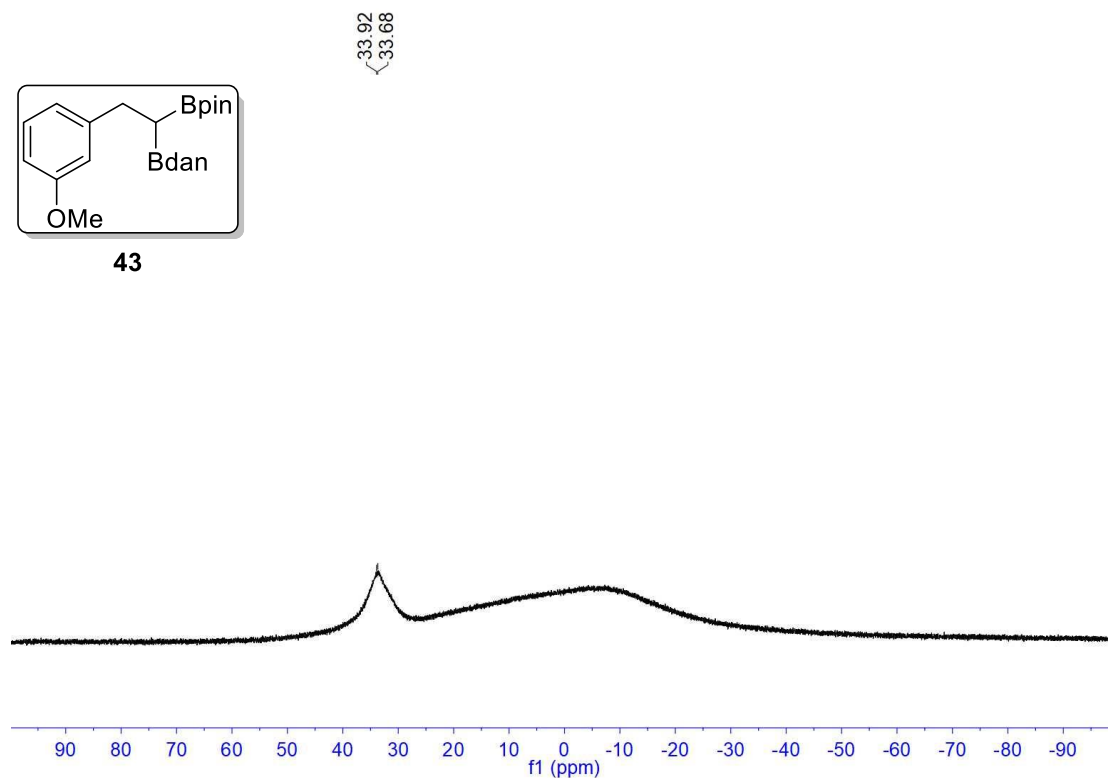

Supplementary Figure 138.  $^{11}\text{B}$  NMR spectrum of compound 43

2-(2-(4-(pentyloxy)phenyl)-1-(4,4,5,5-tetramethyl-1,3,2-dioxaborolan-2-yl)ethyl)-2,3-dihydro-1H-naphtho[1,8-de][1,3,2]diazaborinine (44)

$^1\text{H}$  NMR (500 MHz, room temperature,  $\text{CDCl}_3$ )

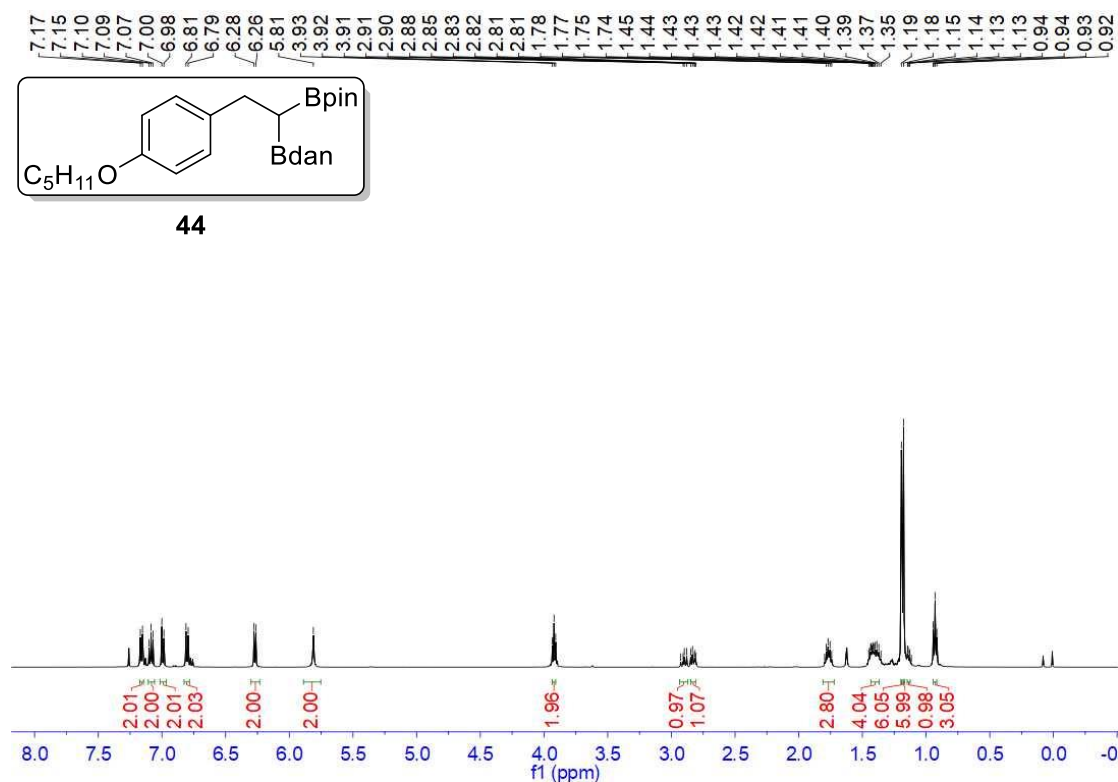

Supplementary Figure 139.  $^1\text{H}$  NMR spectrum of compound 44

$^{13}\text{C}$  NMR (126 MHz, room temperature,  $\text{CDCl}_3$ )

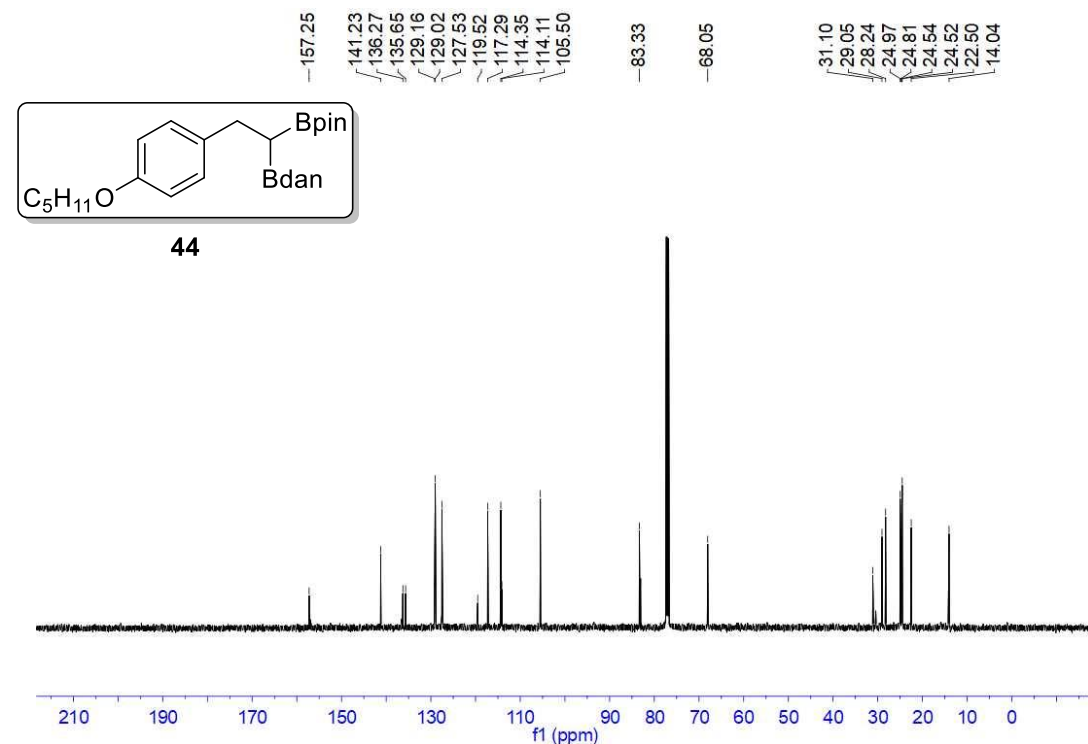

Supplementary Figure 140.  $^{13}\text{C}$  NMR spectrum of compound 44

$^{11}\text{B}$  NMR (160 MHz, room temperature,  $\text{CDCl}_3$ )

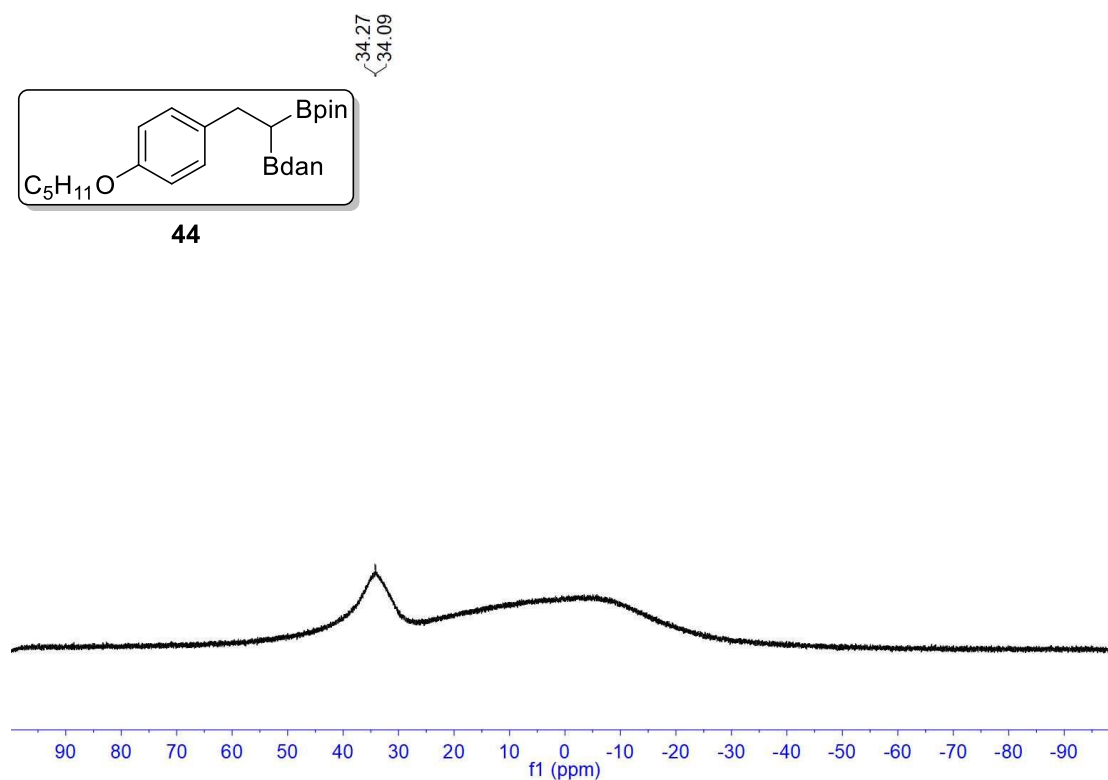

44

Supplementary Figure 141.  $^{11}\text{B}$  NMR spectrum of compound 44

4-(2-(1H-naphtho[1,8-de][1,3,2]diazaborinin-2(3H)-yl)-2-(4,4,5,5-tetramethyl-1,3,2-dioxaborolan-2-yl)ethyl)-N,N-dimethylaniline (45)

$^1\text{H}$  NMR (500 MHz, room temperature,  $\text{CDCl}_3$ )

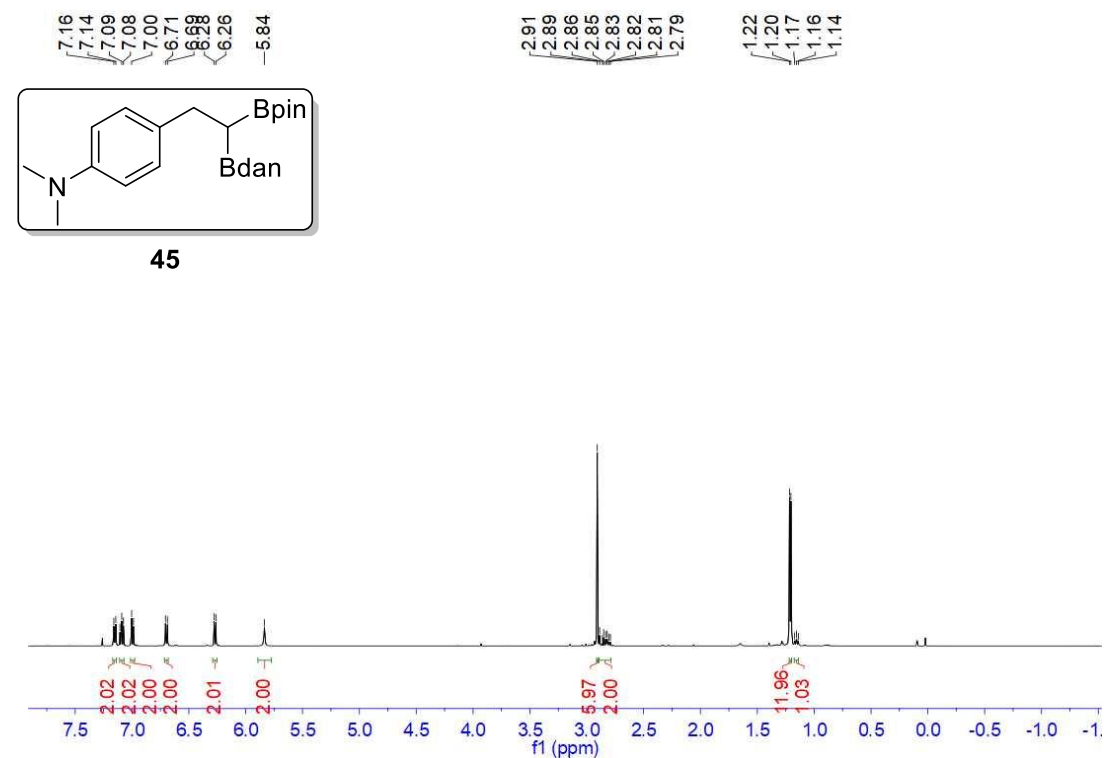

45

Supplementary Figure 142.  $^1\text{H}$  NMR spectrum of compound 45

$^{13}\text{C}$  NMR (126 MHz, room temperature,  $\text{CDCl}_3$ )

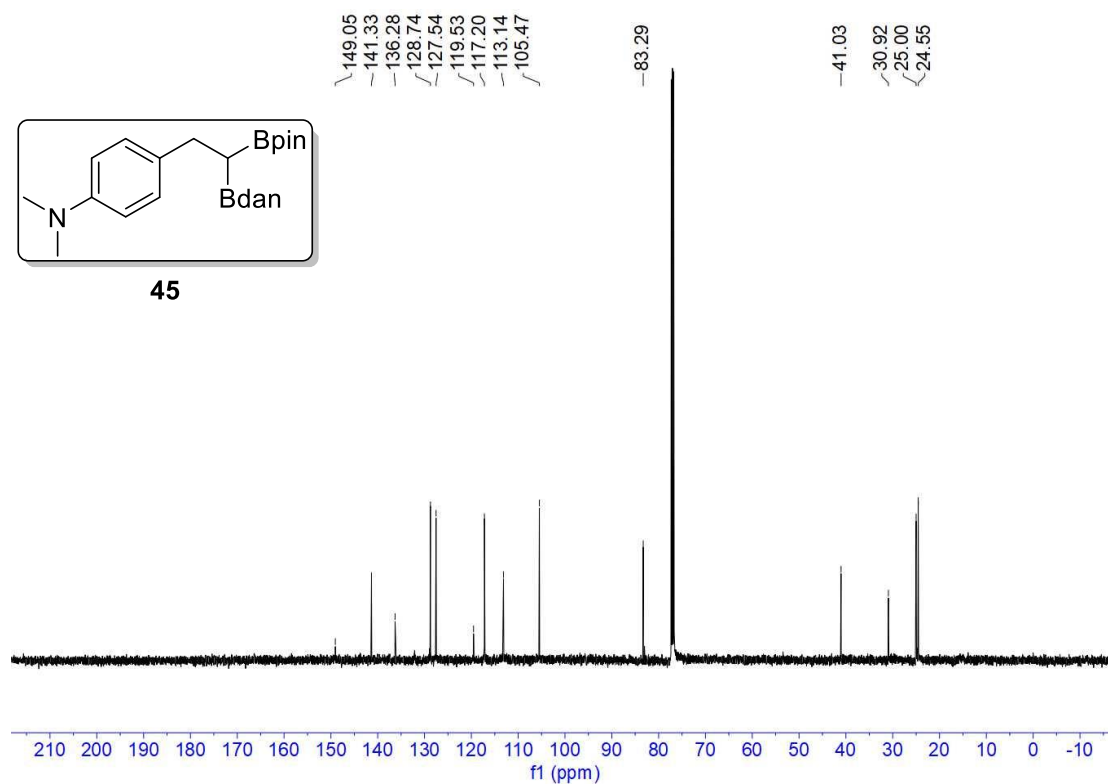

Supplementary Figure 143.  $^{13}\text{C}$  NMR spectrum of compound 45

$^{11}\text{B}$  NMR (160 MHz, room temperature,  $\text{CDCl}_3$ )

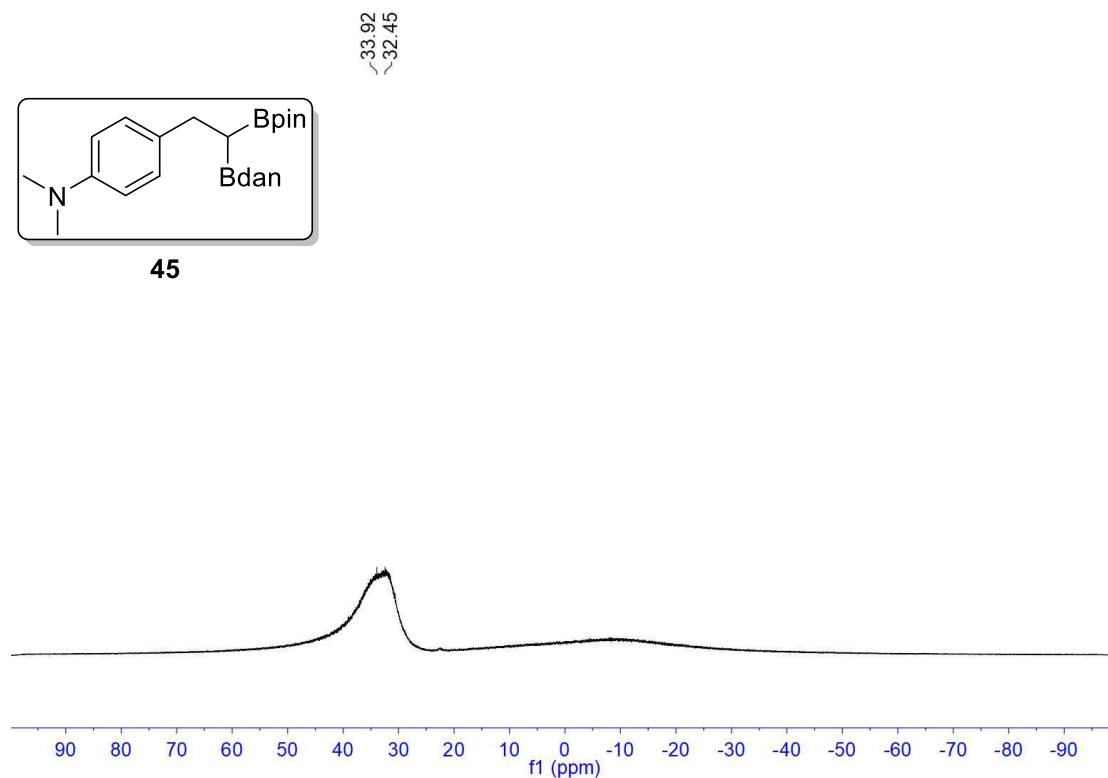

Supplementary Figure 144.  $^{11}\text{B}$  NMR spectrum of compound 45

methyl 4-(2-(1H-naphtho[1,8-de][1,3,2]diazaborinin-2(3H)-yl) -2-(4,4,5,5-tetramethyl-1,3,2-dioxaborolan-2-yl)ethyl)benzoate (46)

<sup>1</sup>H NMR (500 MHz, room temperature, CDCl<sub>3</sub>)

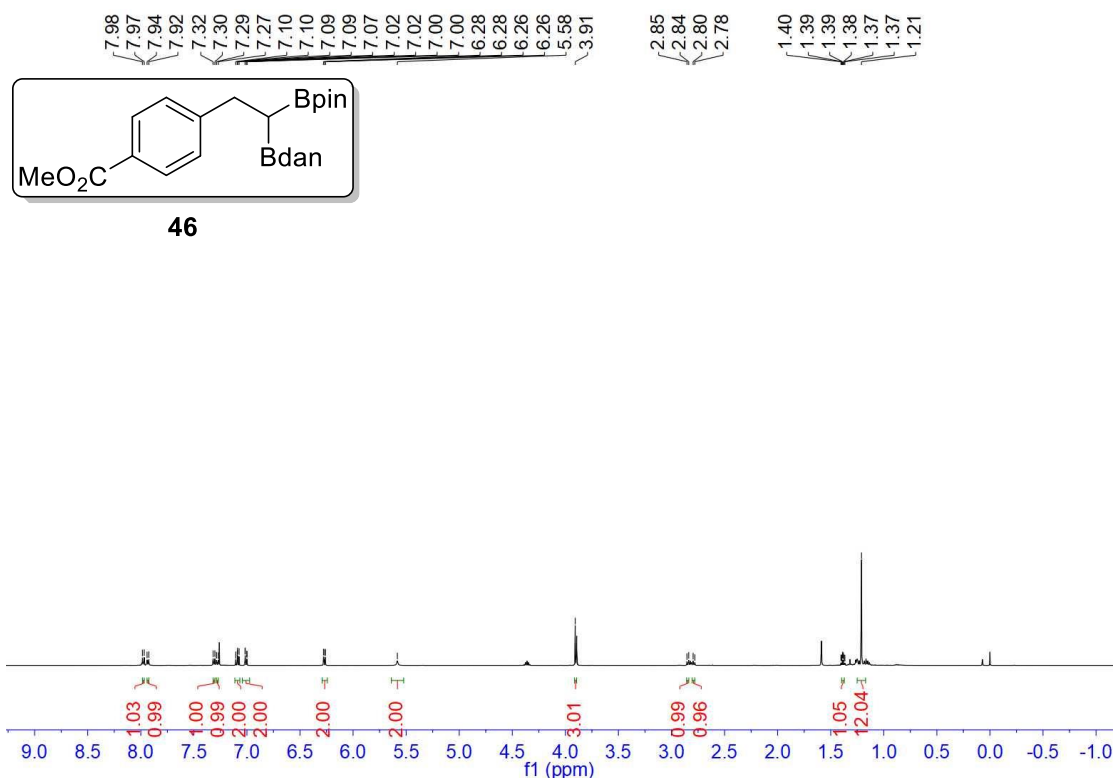

Supplementary Figure 145. <sup>1</sup>H NMR spectrum of compound 46

<sup>13</sup>C NMR (126 MHz, room temperature, CDCl<sub>3</sub>)

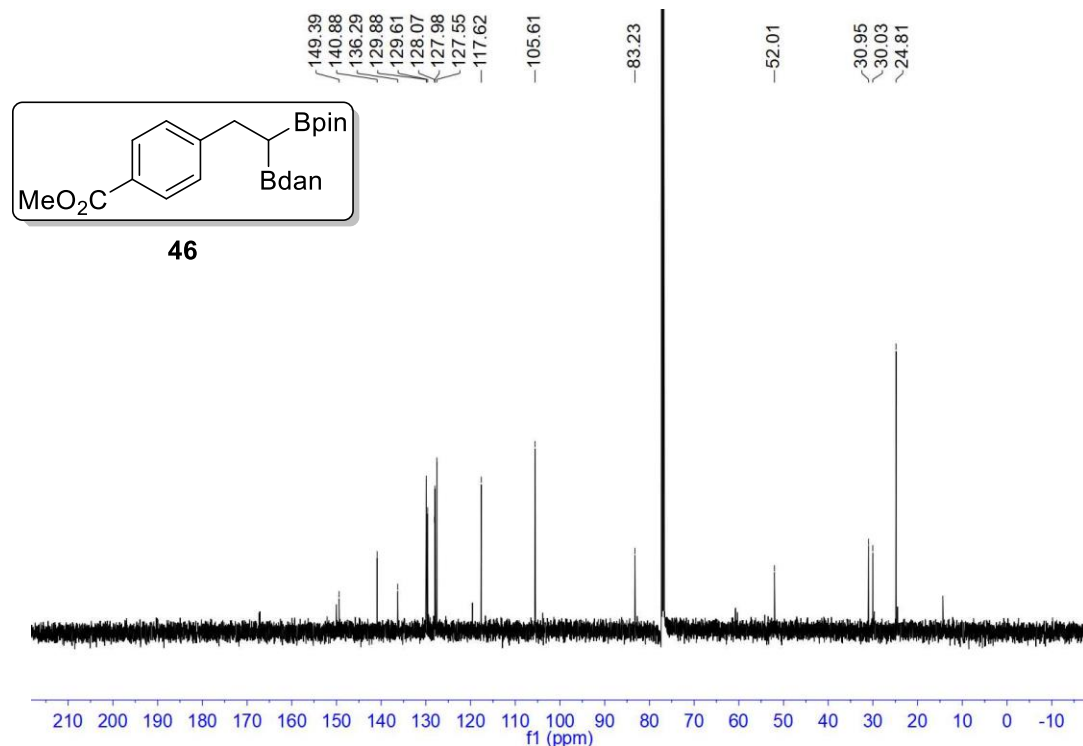

Supplementary Figure 146. <sup>13</sup>C NMR spectrum of compound 46

$^{11}\text{B}$  NMR (160 MHz, room temperature,  $\text{CDCl}_3$ )

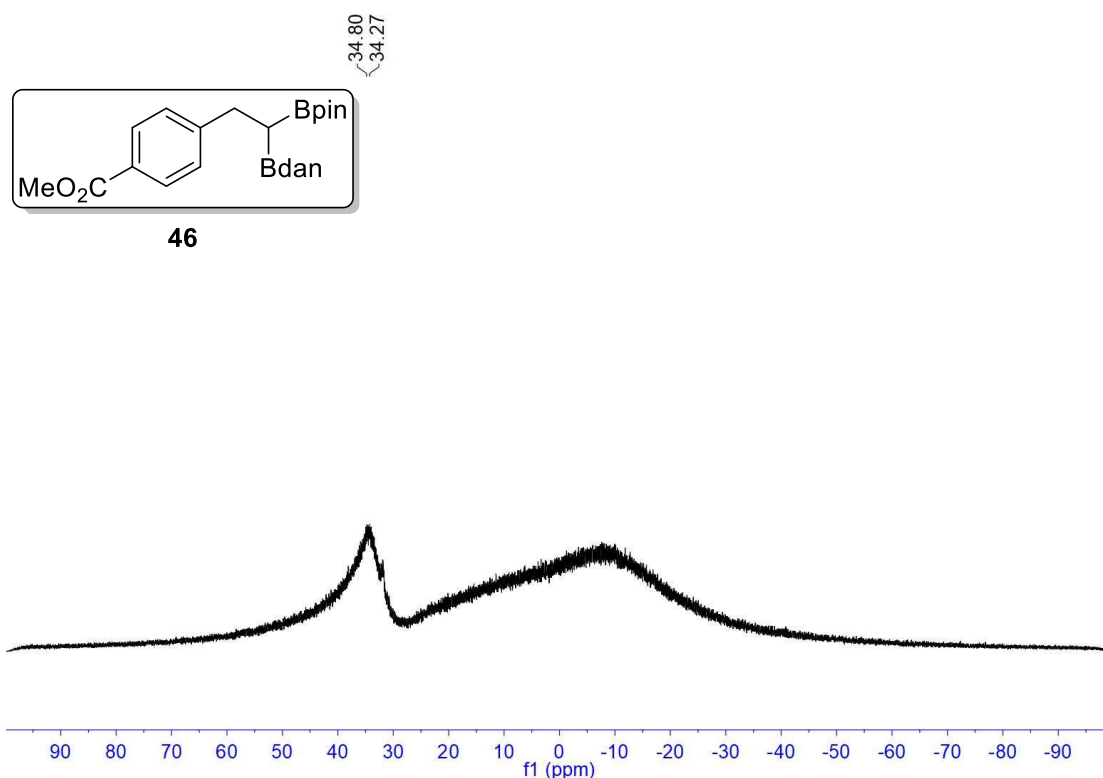

46

Supplementary Figure 147.  $^{11}\text{B}$  NMR spectrum of compound 46

2-(1-(4,4,5,5-tetramethyl-1,3,2-dioxaborolan-2-yl)-2-(4-(trifluoromethoxy)phenyl)ethyl)-2,3-dihydro-1H-naphtho[1,8-de][1,3,2]diazaborinine (47)

$^1\text{H}$  NMR (500 MHz, room temperature,  $\text{CDCl}_3$ )

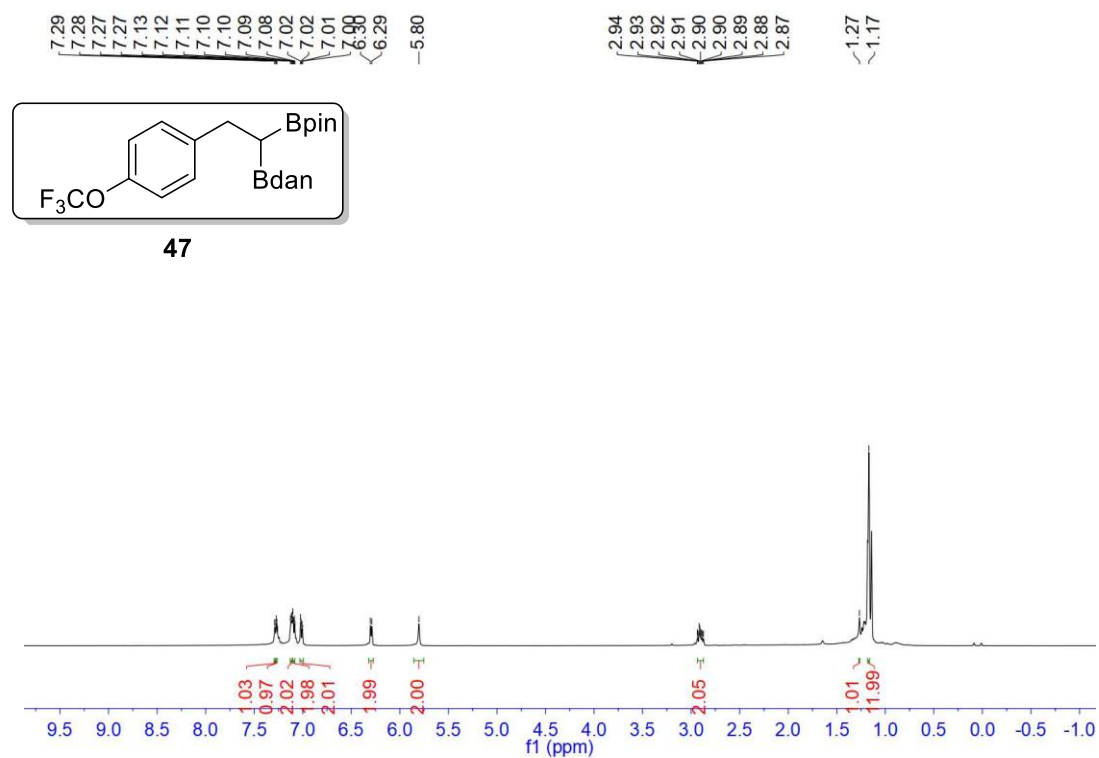

47

Supplementary Figure 148.  $^1\text{H}$  NMR spectrum of compound 47

$^{13}\text{C}$  NMR (126 MHz, room temperature,  $\text{CDCl}_3$ )

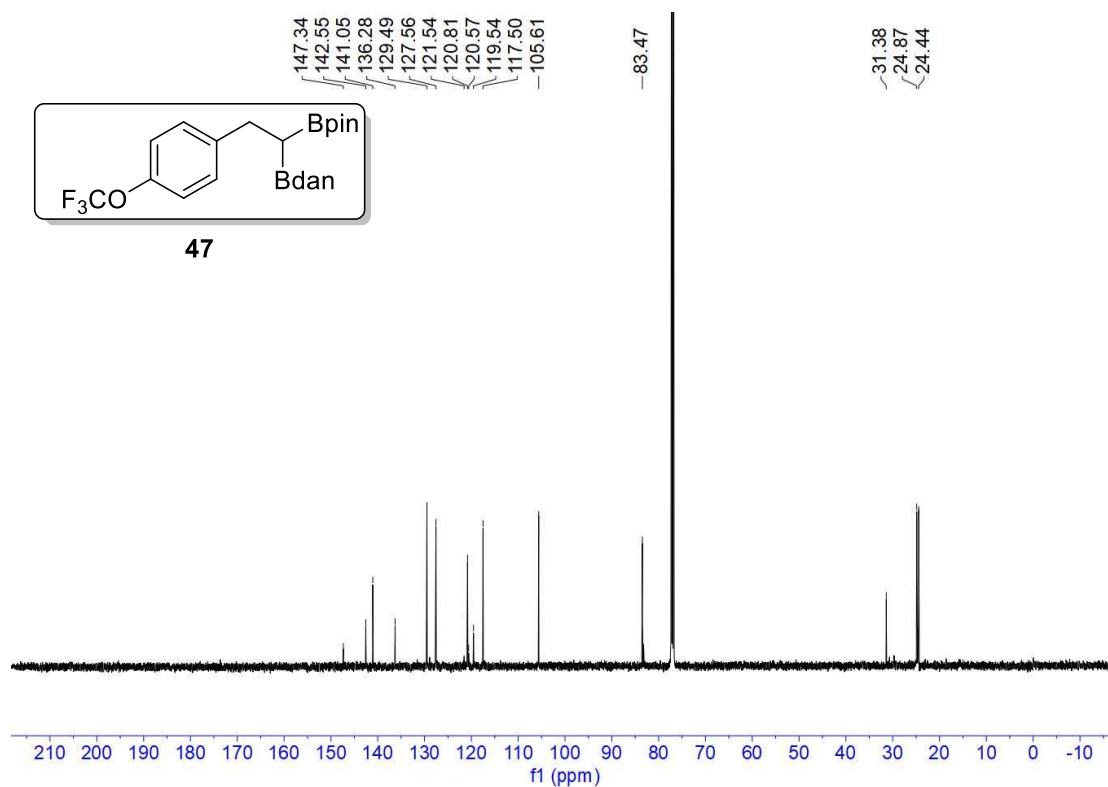

Supplementary Figure 149.  $^{13}\text{C}$  NMR spectrum of compound 47

$^{11}\text{B}$  NMR (160 MHz, room temperature,  $\text{CDCl}_3$ )

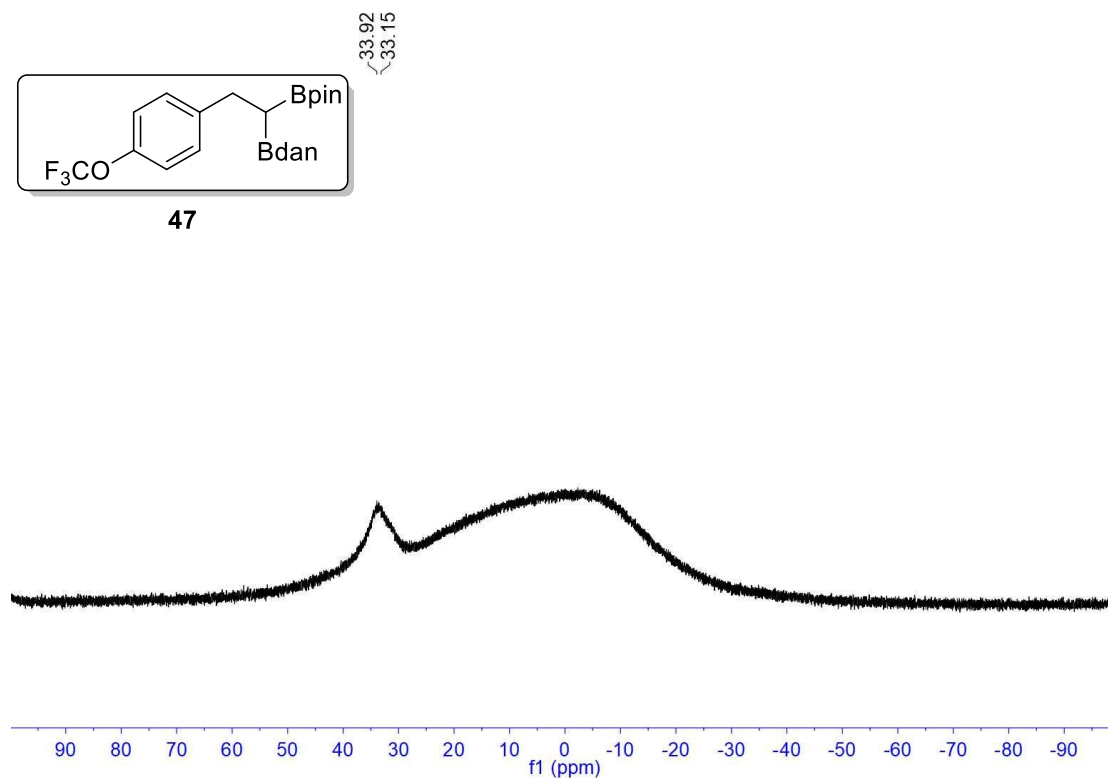

Supplementary Figure 150.  $^{11}\text{B}$  NMR spectrum of compound 47

<sup>19</sup>F NMR (126 MHz, room temperature, CDCl<sub>3</sub>)

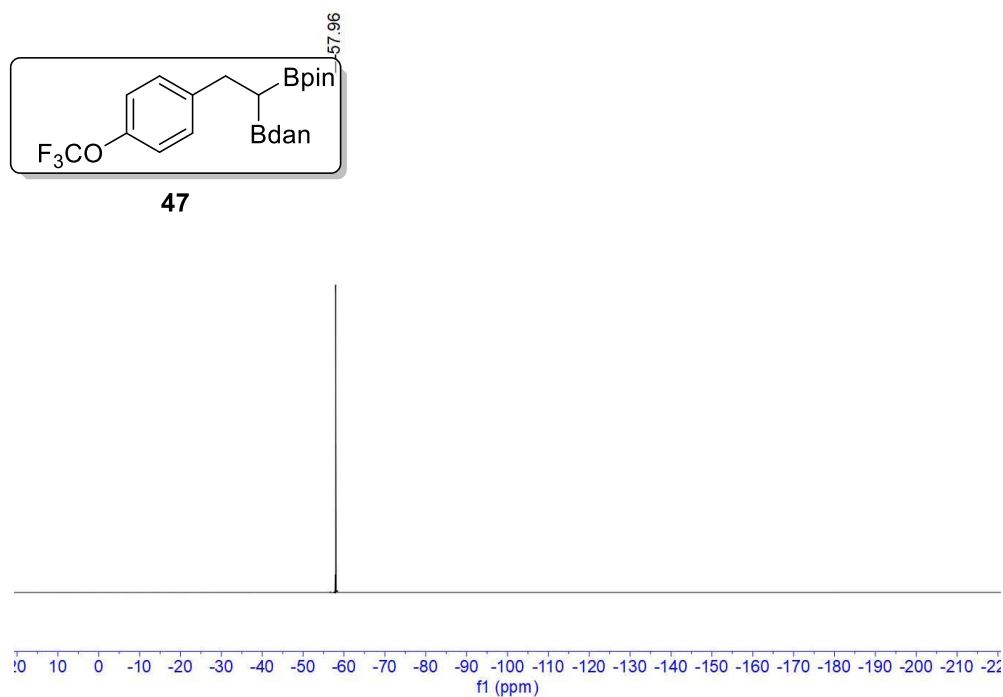

Supplementary Figure 151. <sup>19</sup>F NMR spectrum of compound 47

2-(2-(4-fluorophenyl)-1-(4,4,5,5-tetramethyl-1,3,2-dioxaborolan-2-yl) ethyl)-2,3-dihydro-1H-naphtho[1,8-de][1,3,2]diazaborinine (48)

<sup>1</sup>H NMR (500 MHz, room temperature, CDCl<sub>3</sub>)

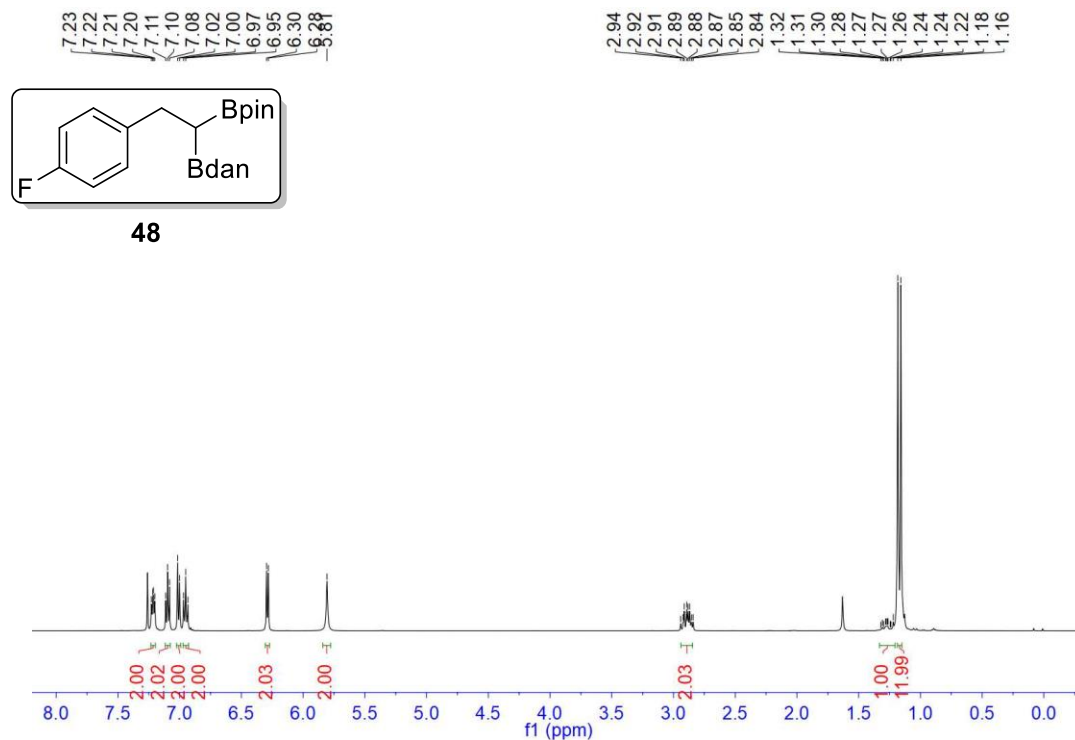

Supplementary Figure 152. <sup>1</sup>H NMR spectrum of compound 48



$^{13}\text{C}$  NMR (126 MHz, room temperature,  $\text{CDCl}_3$ )

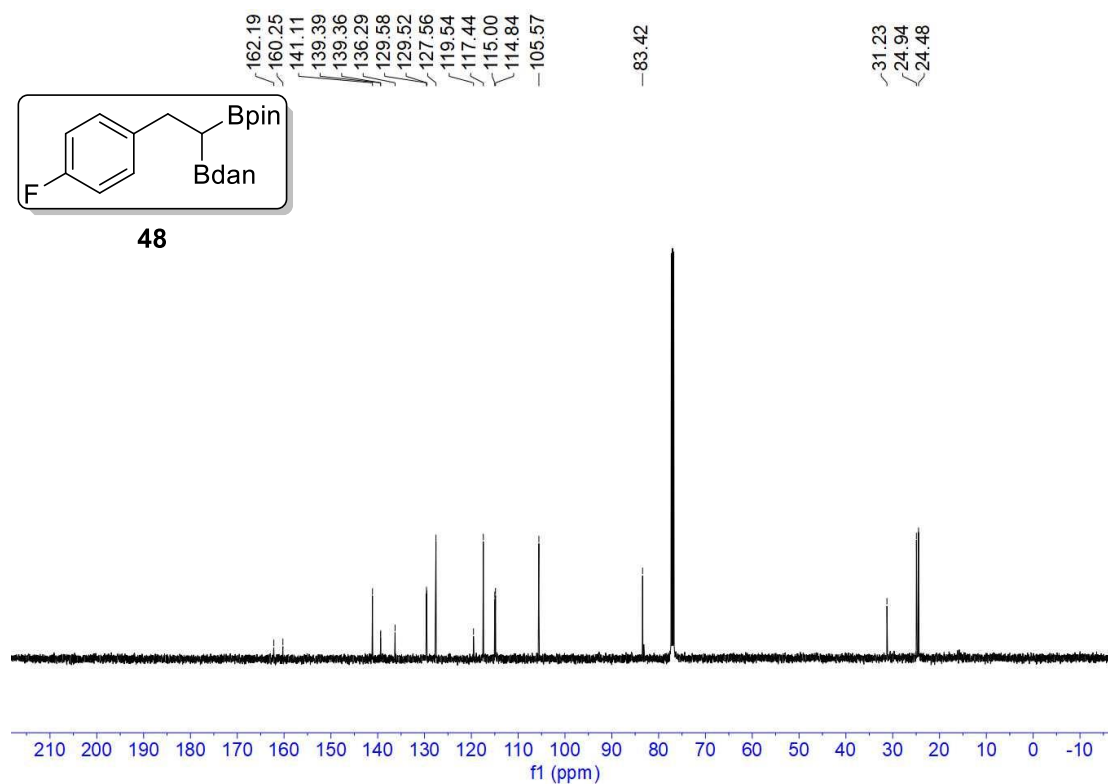

Supplementary Figure 153.  $^{13}\text{C}$  NMR spectrum of compound 48

$^{11}\text{B}$  NMR (160 MHz, room temperature,  $\text{CDCl}_3$ )

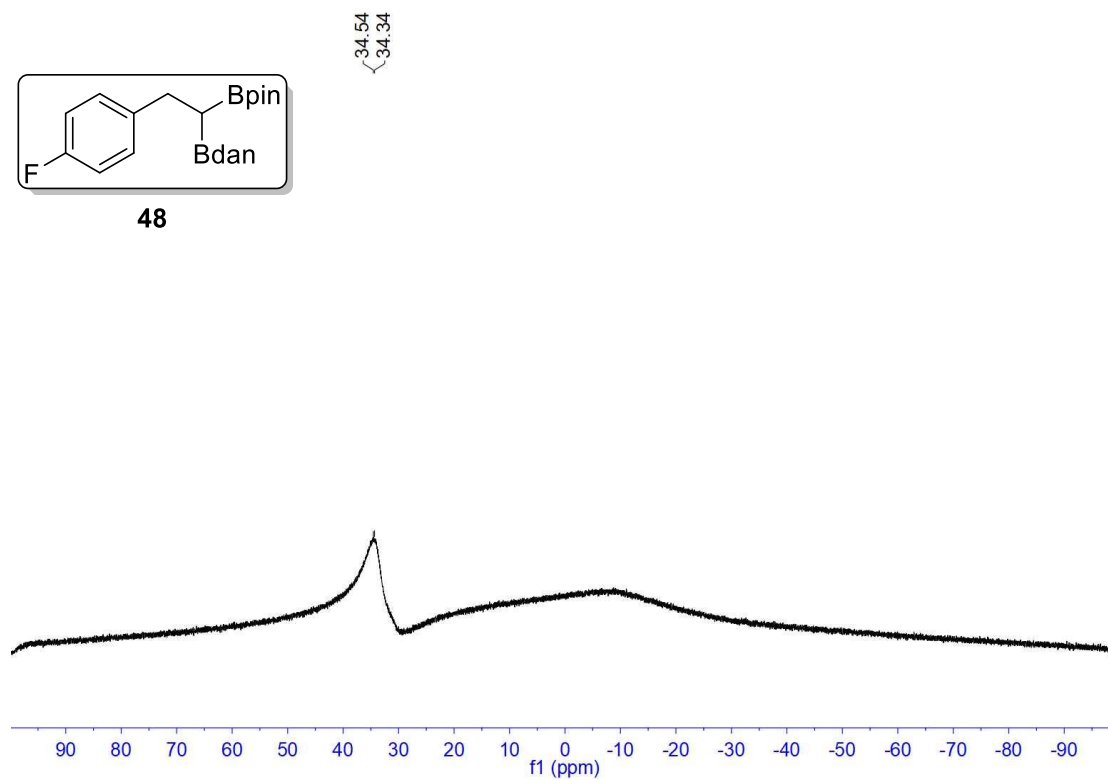

Supplementary Figure 154.  $^{11}\text{B}$  NMR spectrum of compound 48

<sup>19</sup>F NMR (126 MHz, room temperature, CDCl<sub>3</sub>)

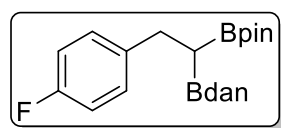

48

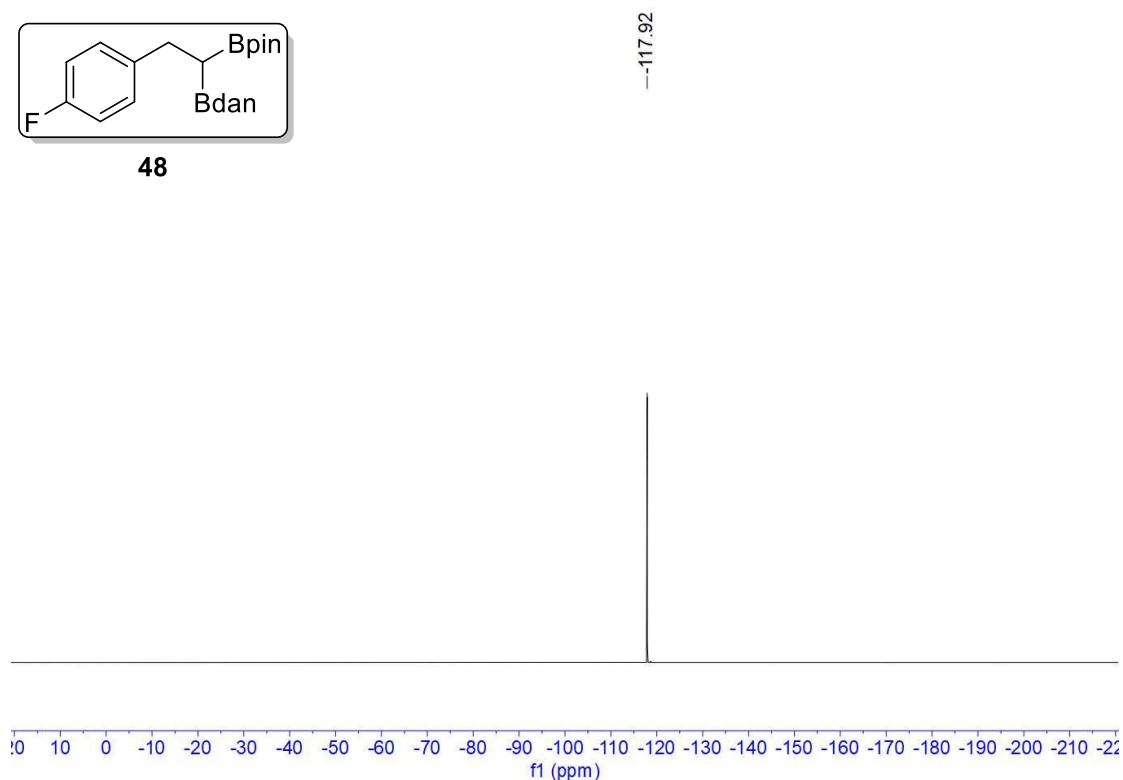

Supplementary Figure 155. <sup>19</sup>F NMR spectrum of compound 48

2-(2-(4-chlorophenyl)-1-(4,4,5,5-tetramethyl-1,3,2-dioxaborolan-2-yl)ethyl)ethane-1,1,1,3-tetramethyl-2,2-dioxaborolane (49)

<sup>1</sup>H NMR (500 MHz, room temperature, CDCl<sub>3</sub>)

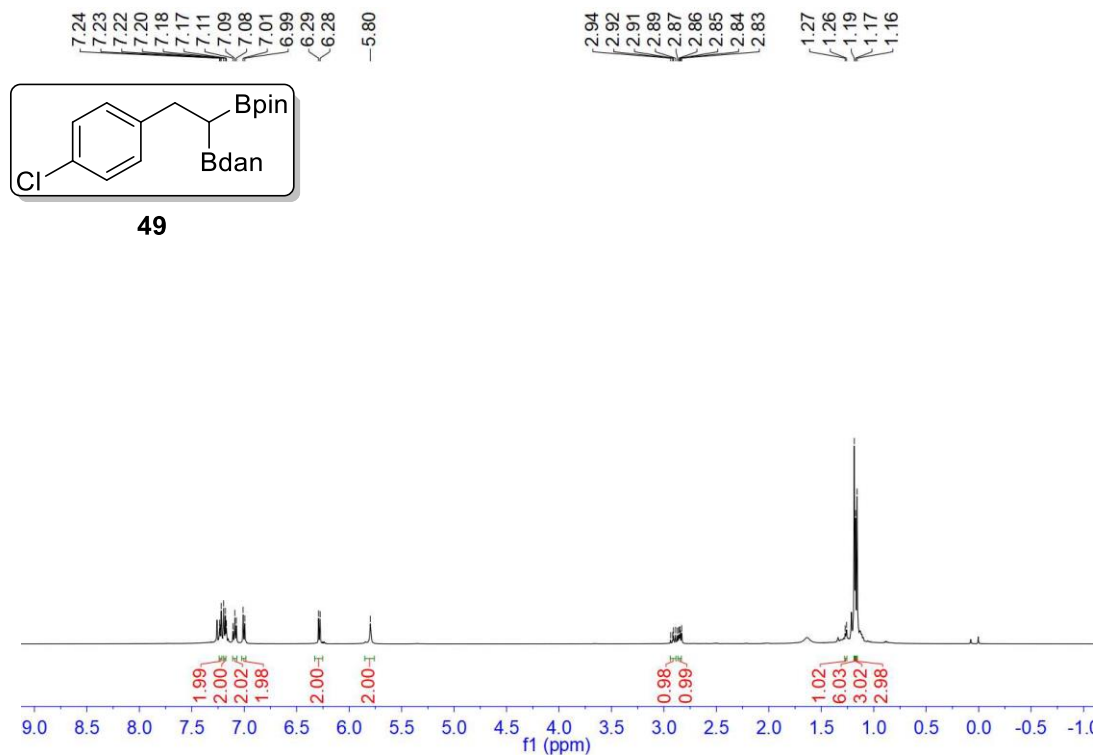

Supplementary Figure 156. <sup>1</sup>H NMR spectrum of compound 49

$^{13}\text{C}$  NMR (126 MHz, room temperature,  $\text{CDCl}_3$ )

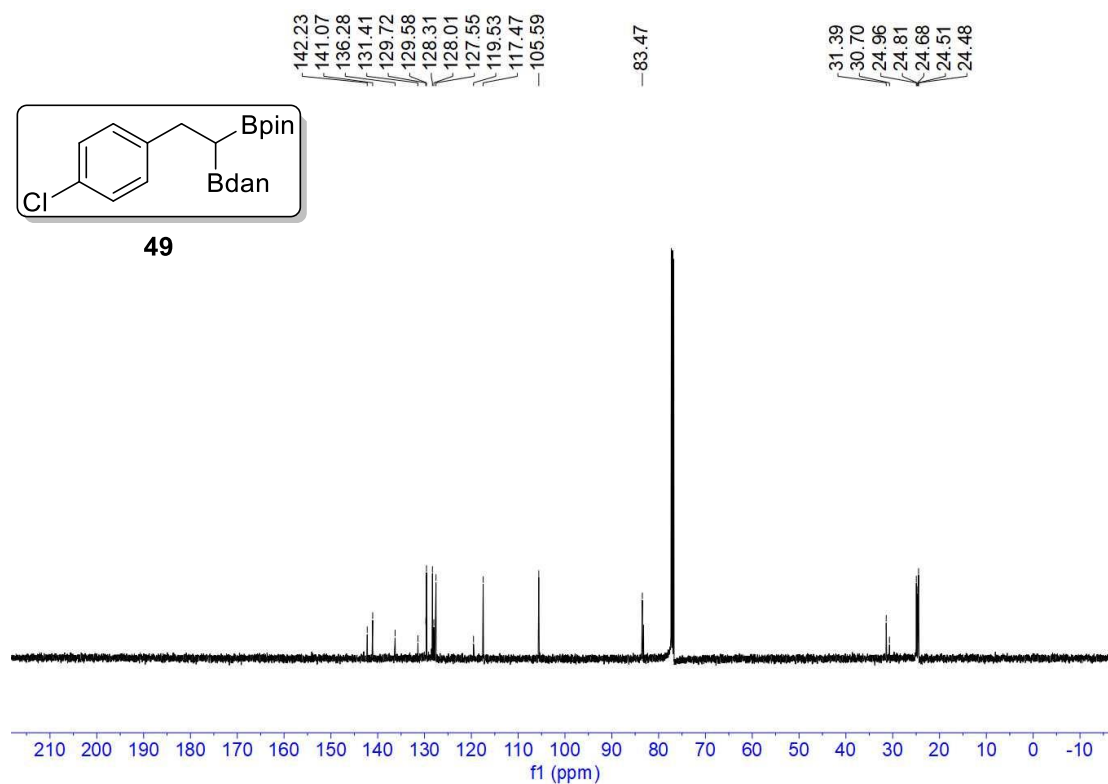

Supplementary Figure 157.  $^{13}\text{C}$  NMR spectrum of compound 49

$^{11}\text{B}$  NMR (160 MHz, room temperature,  $\text{CDCl}_3$ )

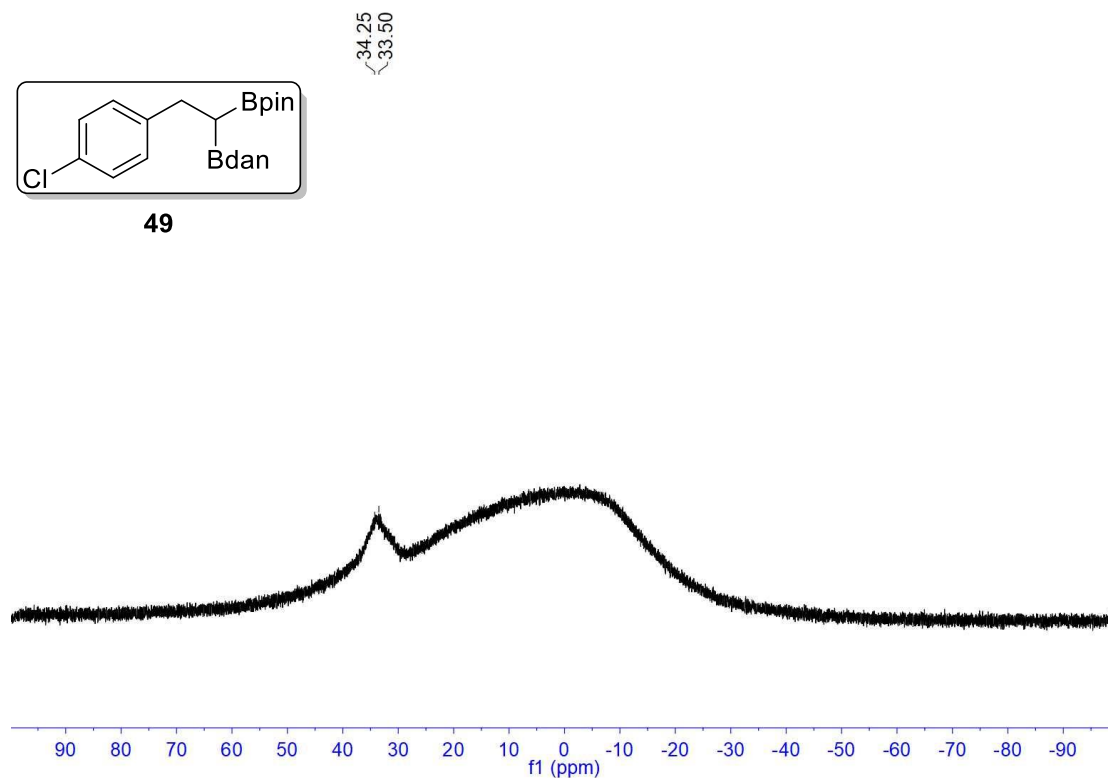

Supplementary Figure 158.  $^{11}\text{B}$  NMR spectrum of compound 49

2-(1-(4,4,5,5-tetramethyl-1,3,2-dioxaborolan-2-yl)-2-(4-(trifluoromethyl)phenyl) ethyl)-2,3-dihydro-1H-naphtho[1,8-de][1,3,2]diazaborinine (50)

$^1\text{H}$  NMR (500 MHz, room temperature,  $\text{CDCl}_3$ )

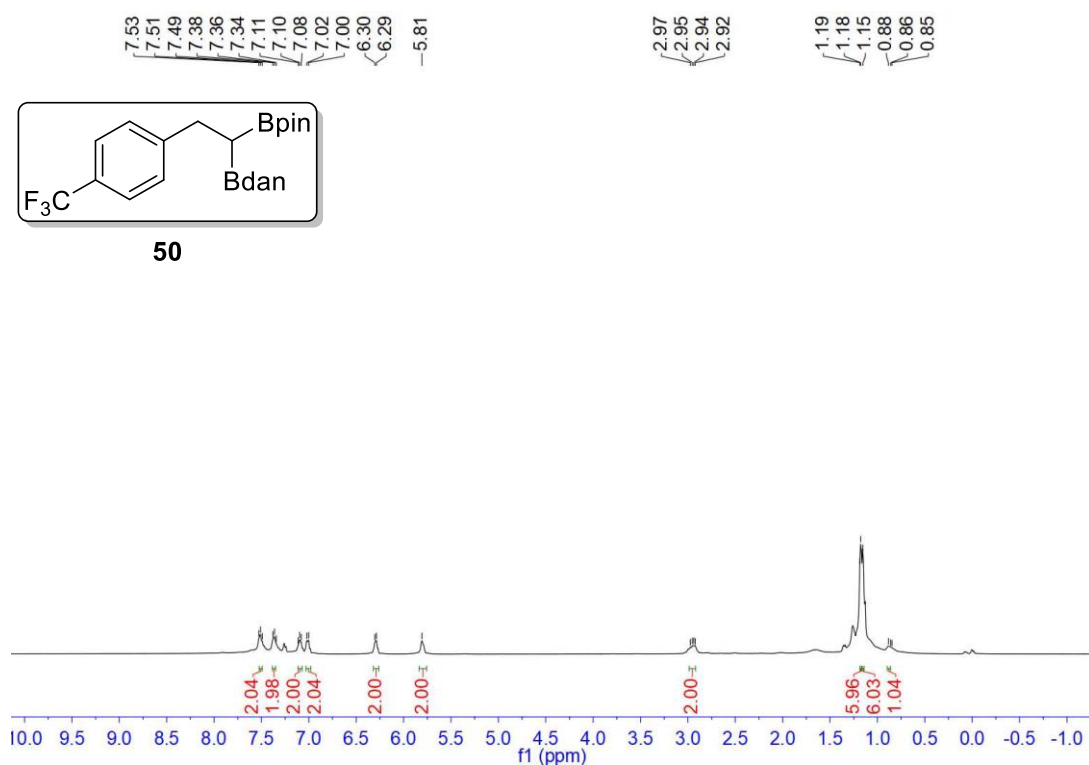

Supplementary Figure 159.  $^1\text{H}$  NMR spectrum of compound 50

$^{13}\text{C}$  NMR (126 MHz, room temperature,  $\text{CDCl}_3$ )

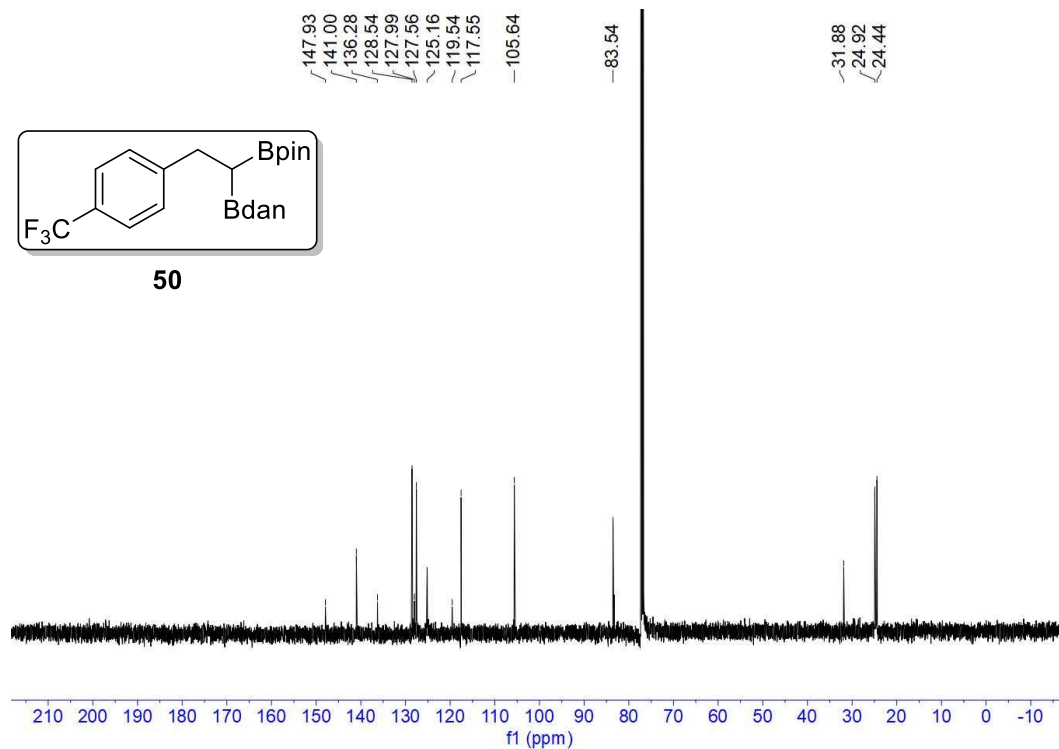

Supplementary Figure 160.  $^{13}\text{C}$  NMR spectrum of compound 50

**$^{11}\text{B}$  NMR (160 MHz, room temperature,  $\text{CDCl}_3$ )**

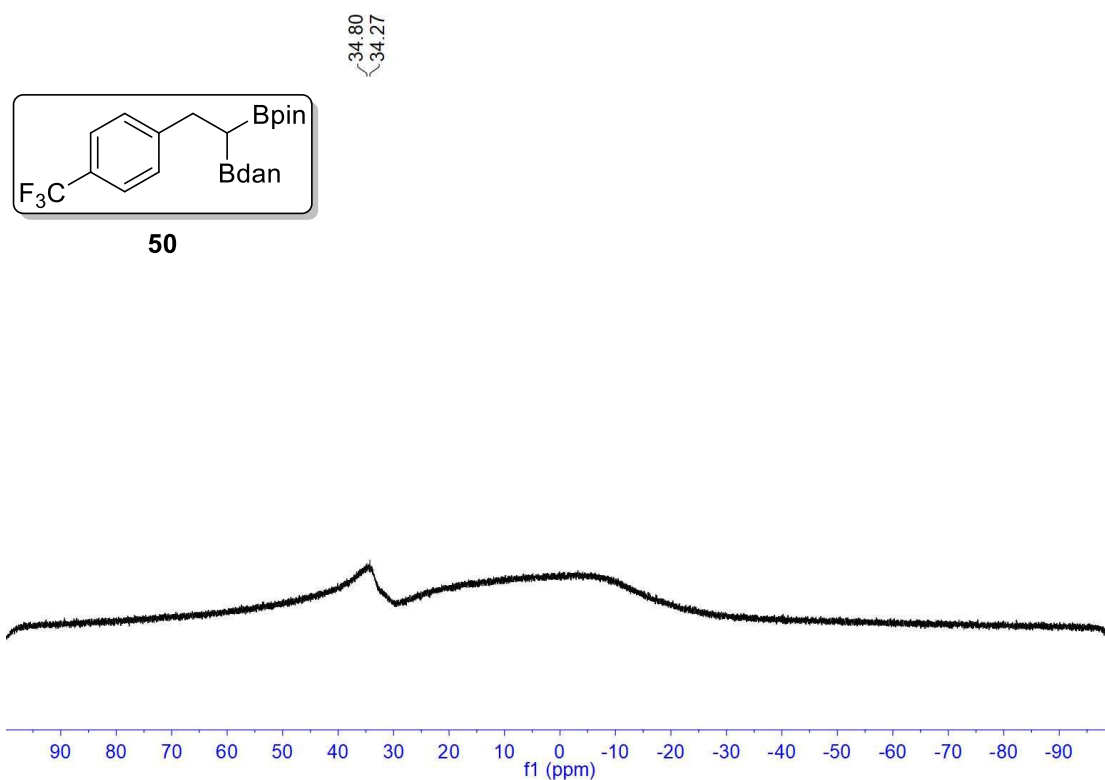

Supplementary Figure 161.  $^{11}\text{B}$  NMR spectrum of compound 50

**$^{19}\text{F}$  NMR (126 MHz, room temperature,  $\text{CDCl}_3$ )**

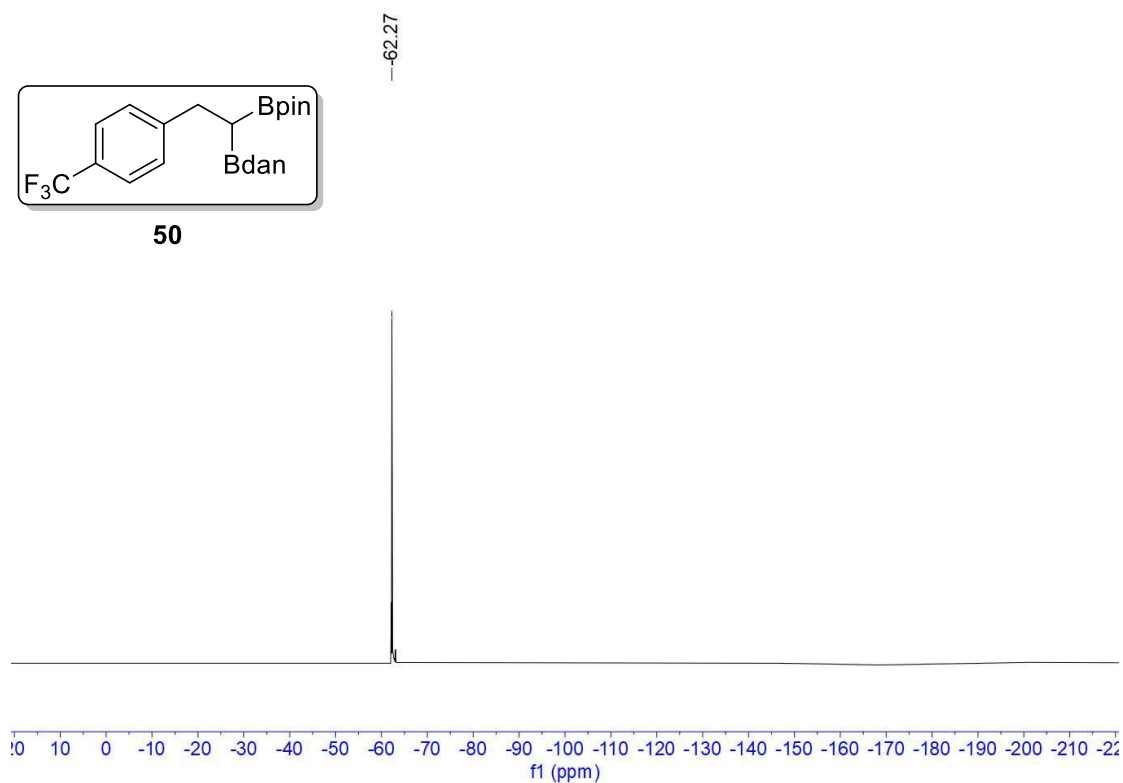

Supplementary Figure 162.  $^{19}\text{F}$  NMR spectrum of compound 50

2-(1-(4,4,5,5-tetramethyl-1,3,2-dioxaborolan-2-yl)-2-(m-tolyl)ethyl)-2,3-dihydro-1H-naphtho[1,8-de][1,3,2]diazaborinine (51)

$^1\text{H}$  NMR (500 MHz, room temperature,  $\text{CDCl}_3$ )

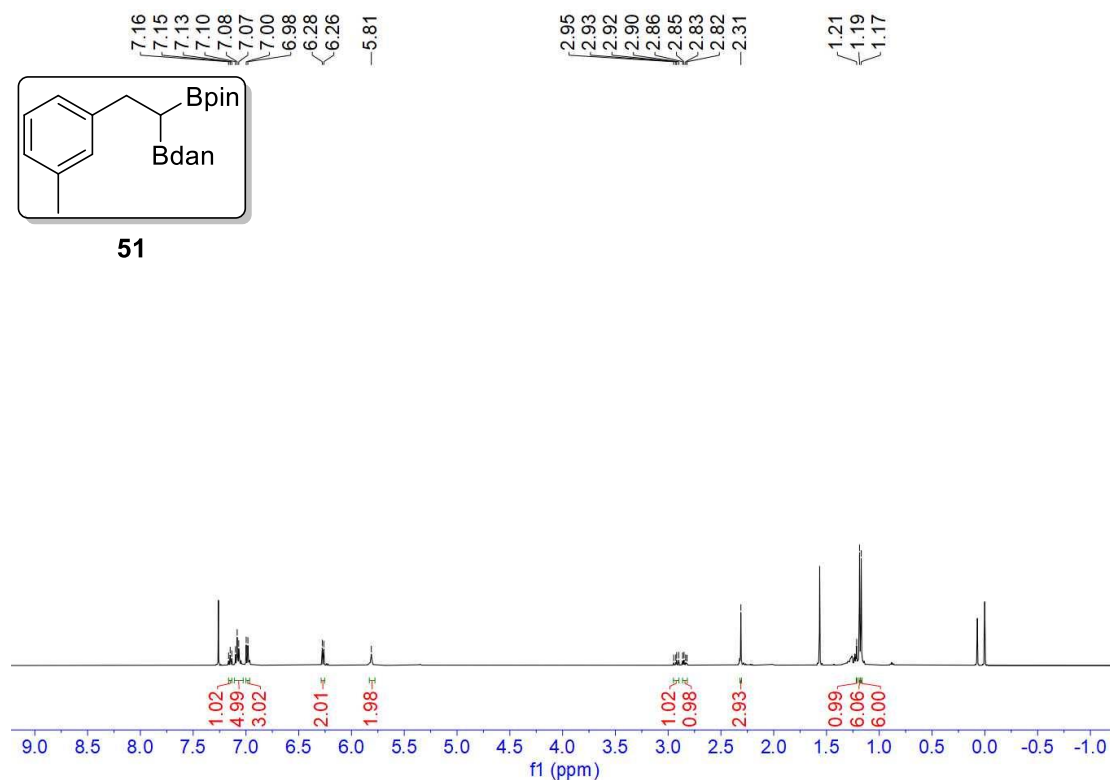

Supplementary Figure 163.  $^1\text{H}$  NMR spectrum of compound 51

$^{13}\text{C}$  NMR (126 MHz, room temperature,  $\text{CDCl}_3$ )

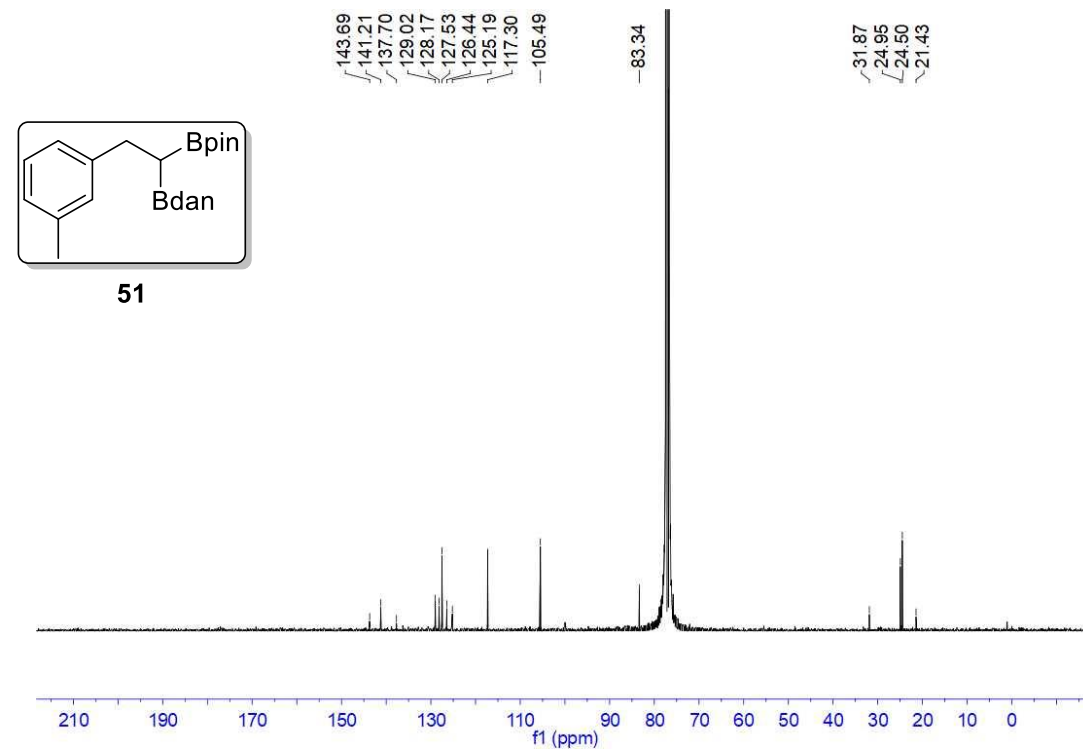

Supplementary Figure 164.  $^{13}\text{C}$  NMR spectrum of compound 51

**<sup>11</sup>B NMR (160 MHz, room temperature, CDCl<sub>3</sub>)**

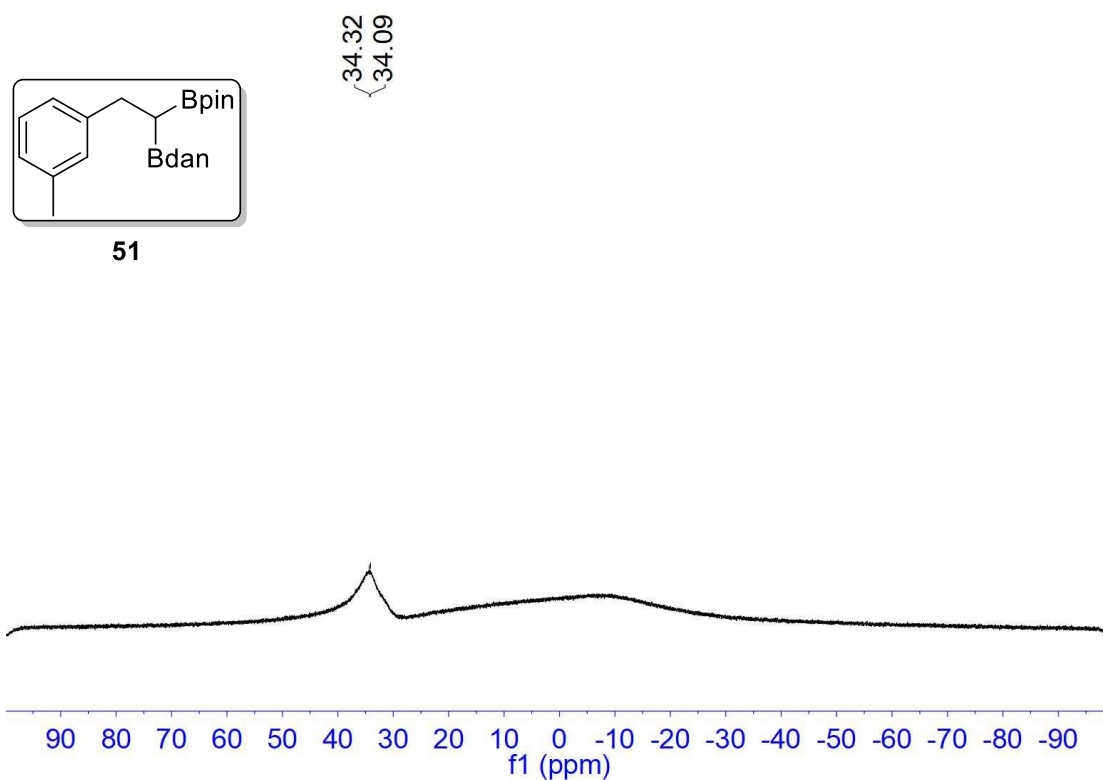

Supplementary Figure 165. <sup>11</sup>B NMR spectrum of compound 51

2-(2-(3,4-dimethylphenyl)-1-(4,4,5,5-tetramethyl-1,3,2-dioxaborolan-2-yl)ethyl)-2,3-dihydro-1H-naphtho[1,8-de][1,3,2]diazaborinine (52)

**<sup>1</sup>H NMR (500 MHz, room temperature, CDCl<sub>3</sub>)**

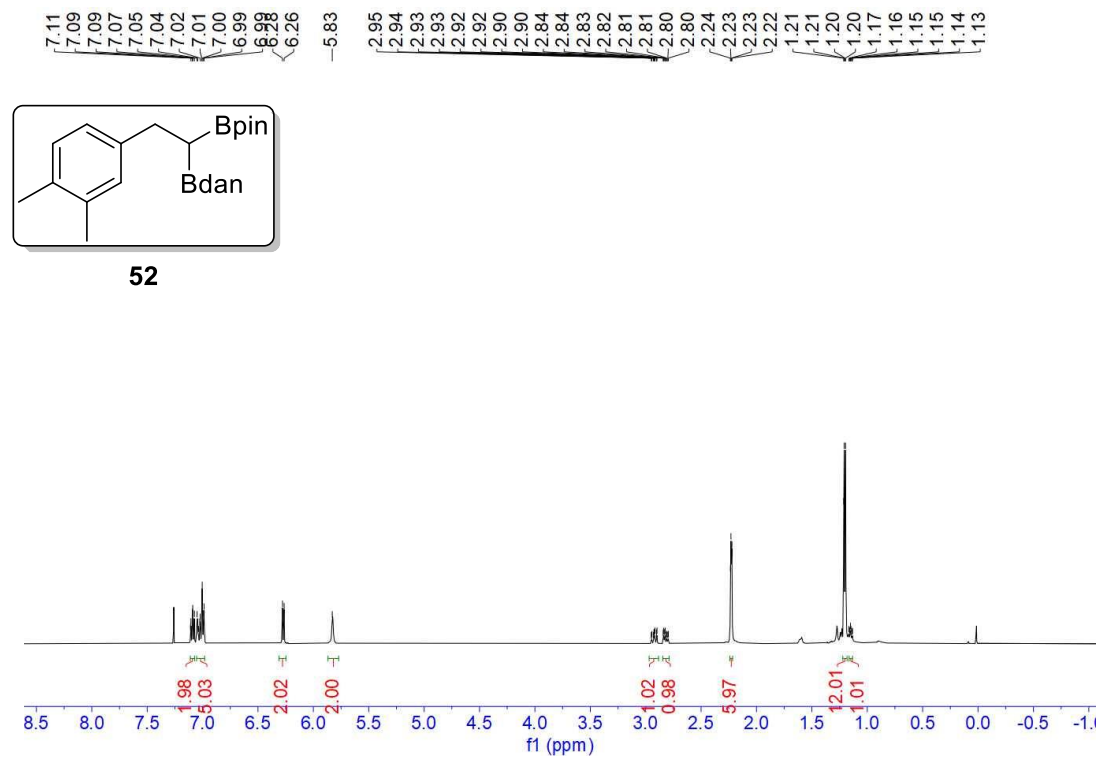

Supplementary Figure 166. <sup>1</sup>H NMR spectrum of compound 52

$^{13}\text{C}$  NMR (126 MHz, room temperature,  $\text{CDCl}_3$ )

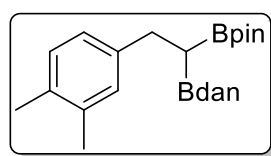

141.27  
141.18  
136.29  
136.23  
133.71  
129.54  
127.54  
125.47  
119.54  
-105.49  
-83.33  
31.46  
29.73  
24.99  
24.53  
19.76

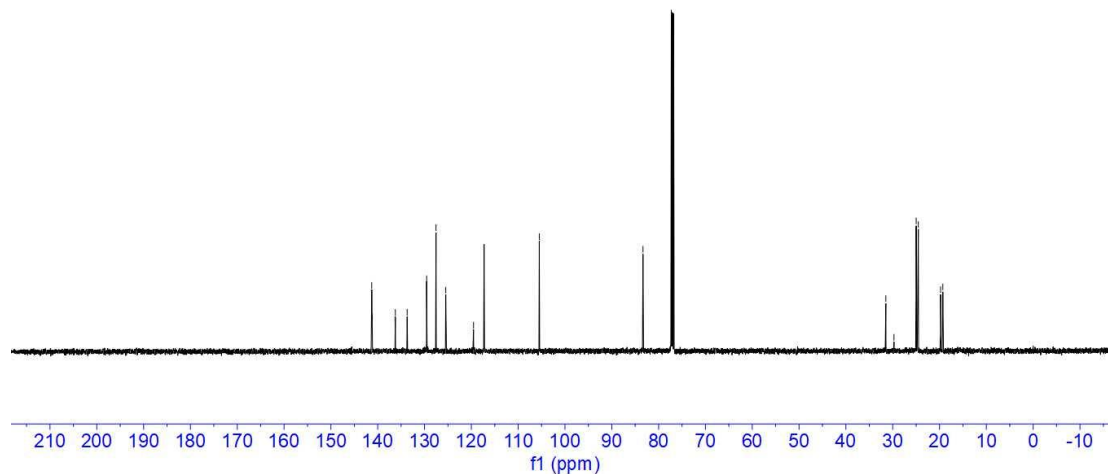

Supplementary Figure 167.  $^{13}\text{C}$  NMR spectrum of compound 52

$^{11}\text{B}$  NMR (160 MHz, room temperature,  $\text{CDCl}_3$ )

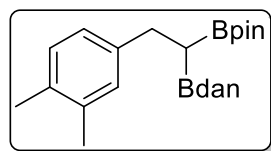

32.27  
31.57

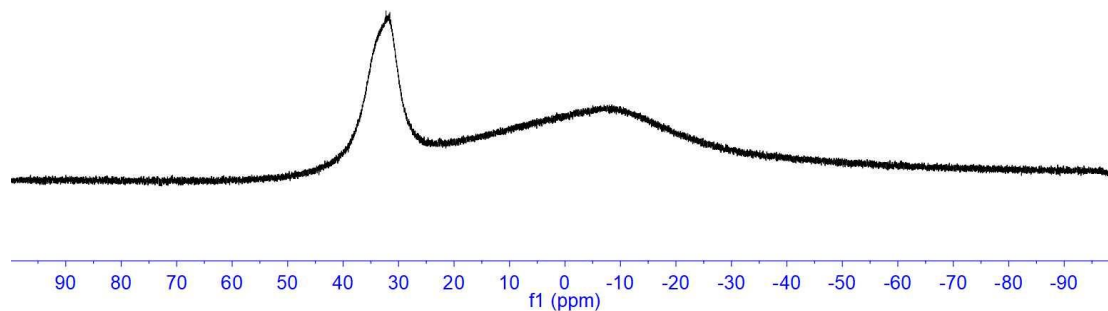

Supplementary Figure 168.  $^{11}\text{B}$  NMR spectrum of compound 52



**2-(2-(3,5-dimethylphenyl)-1-(4,4,5,5-tetramethyl-1,3,2-dioxaborolan-2-yl)ethyl)-2,3-dihydro-1H-naphtho[1,8-de][1,3,2]diazaborinine (53)**

**<sup>1</sup>H NMR (500 MHz, room temperature, CDCl<sub>3</sub>)**

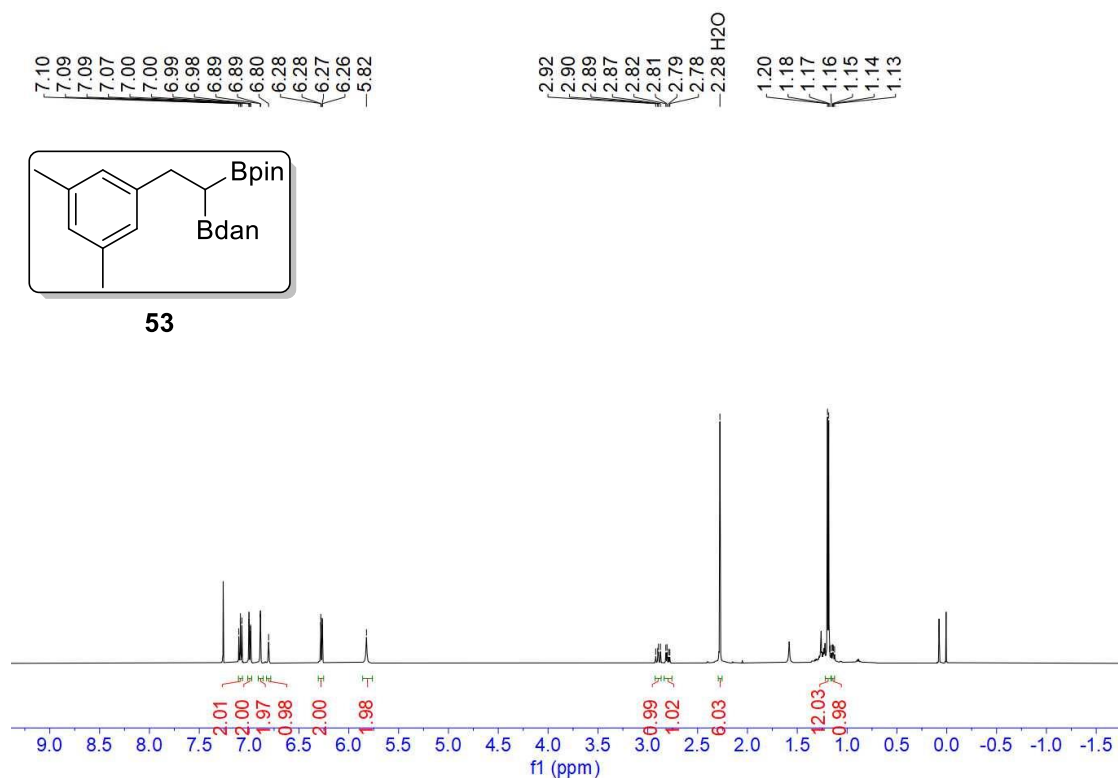

**Supplementary Figure 169. <sup>1</sup>H NMR spectrum of compound 53**

**<sup>13</sup>C NMR (126 MHz, room temperature, CDCl<sub>3</sub>)**

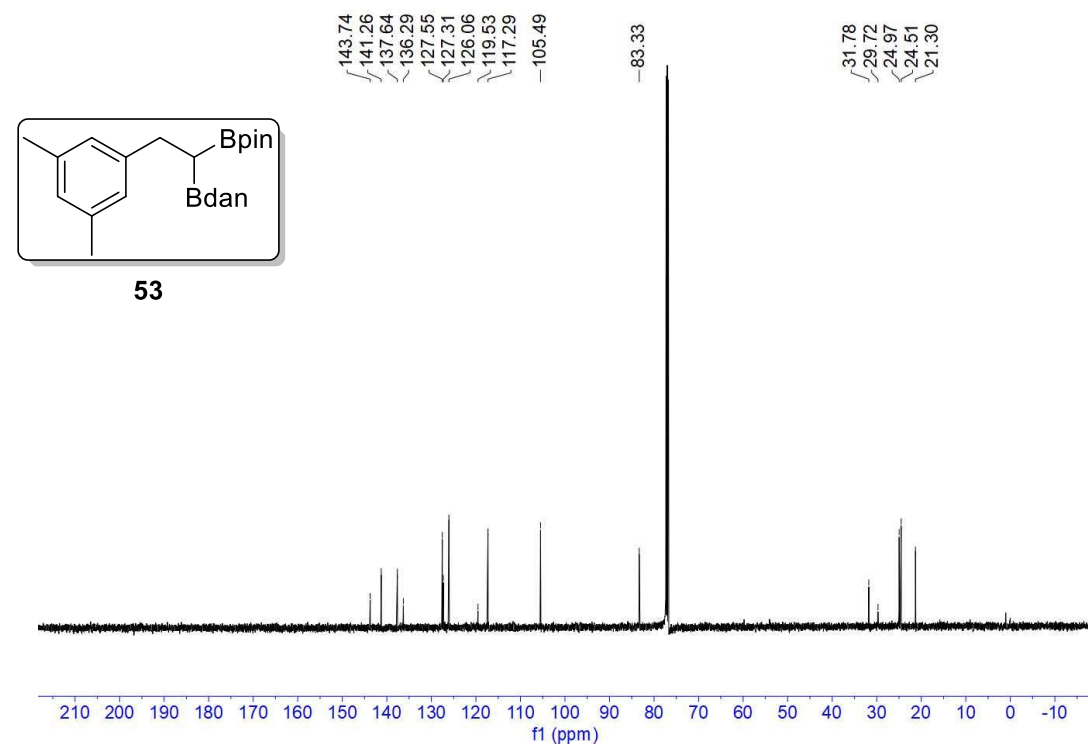

**Supplementary Figure 170. <sup>13</sup>C NMR spectrum of compound 53**

**<sup>11</sup>B NMR (160 MHz, room temperature, CDCl<sub>3</sub>)**

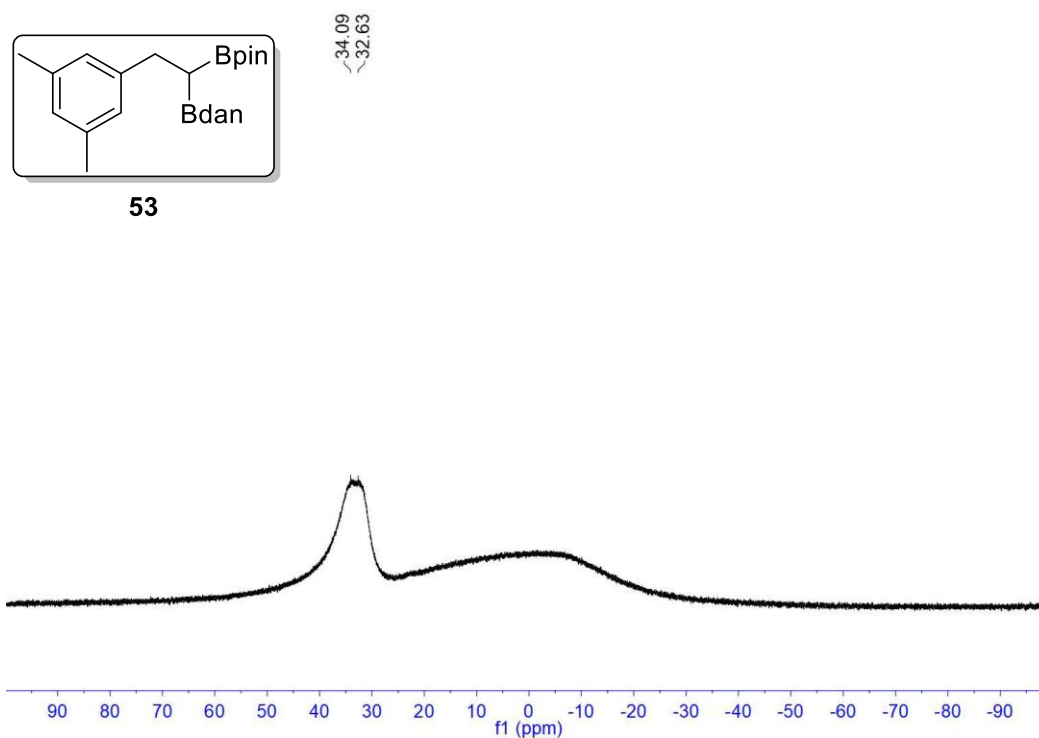

**53**

**Supplementary Figure 171. <sup>11</sup>B NMR spectrum of compound 53**

**2-(2-(4,4-dimethylthiochroman-7-yl)-1-(4,4,5,5-tetramethyl-1,3,2-dioxaborolan-2-yl)ethyl)-2,3-dihydro-1H-naphtho[1,8-de][1,3,2]diazaborinine (54)**

**<sup>1</sup>H NMR (500 MHz, room temperature, CDCl<sub>3</sub>)**

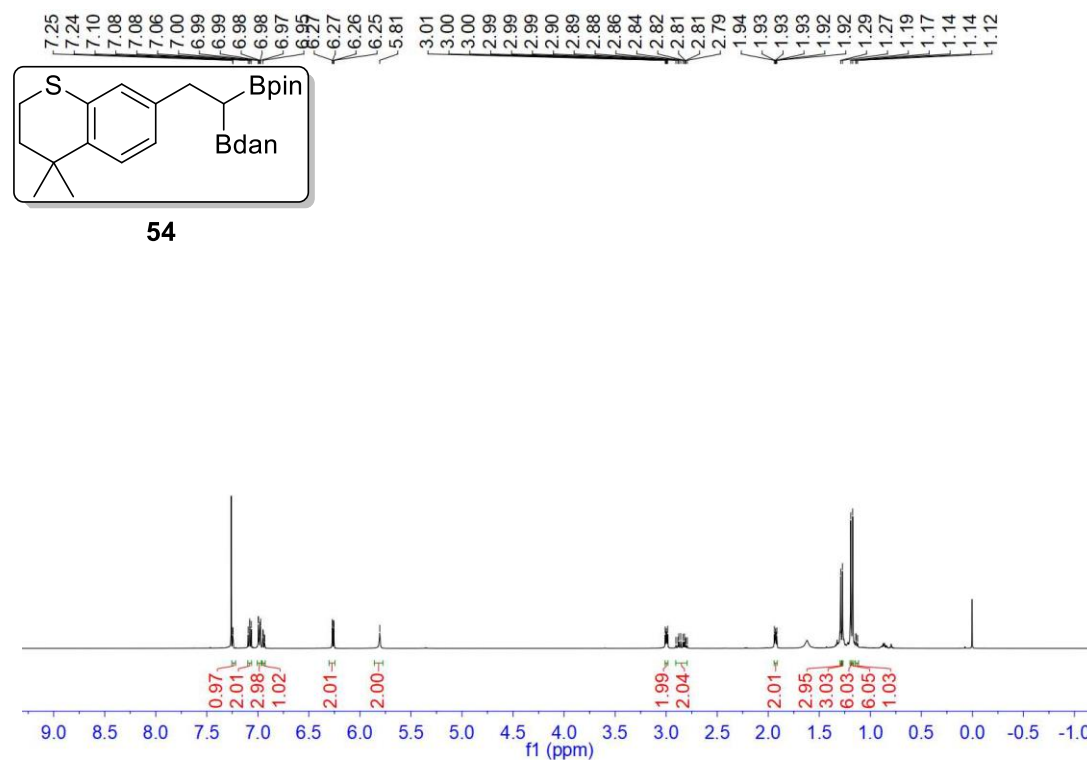

**54**

**Supplementary Figure 172. <sup>1</sup>H NMR spectrum of compound 54**

$^{13}\text{C}$  NMR (126 MHz, room temperature,  $\text{CDCl}_3$ )

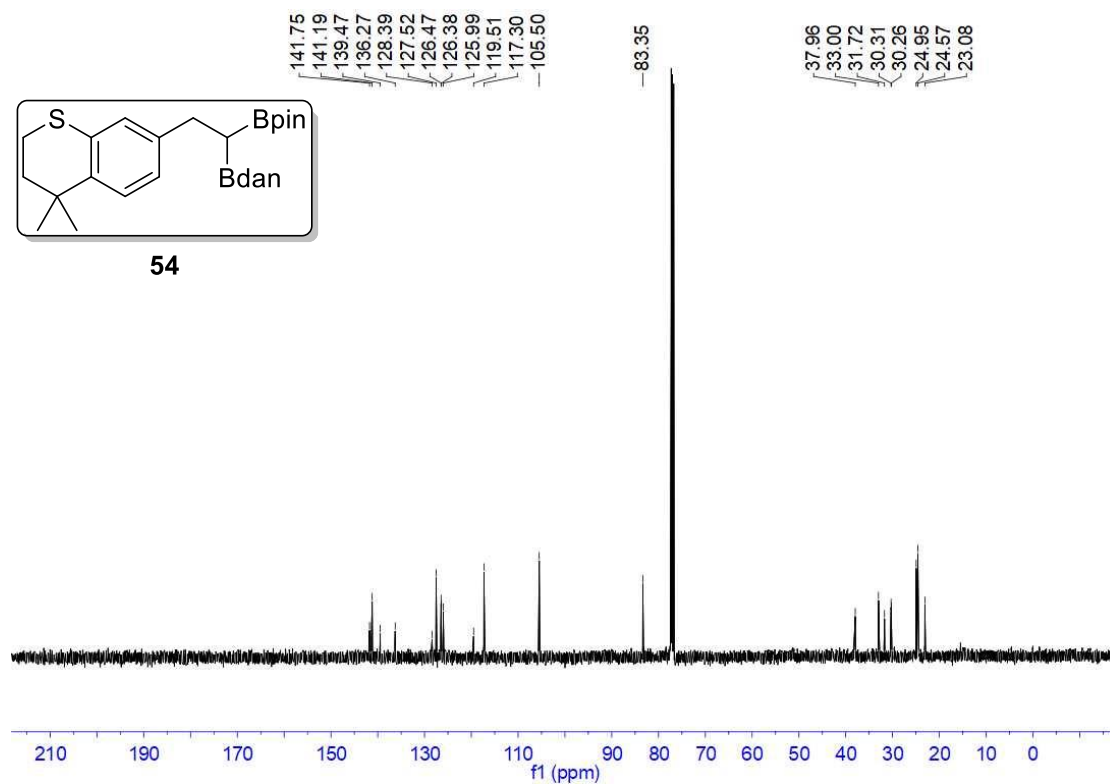

Supplementary Figure 173.  $^{13}\text{C}$  NMR spectrum of compound 54

$^{11}\text{B}$  NMR (160 MHz, room temperature,  $\text{CDCl}_3$ )

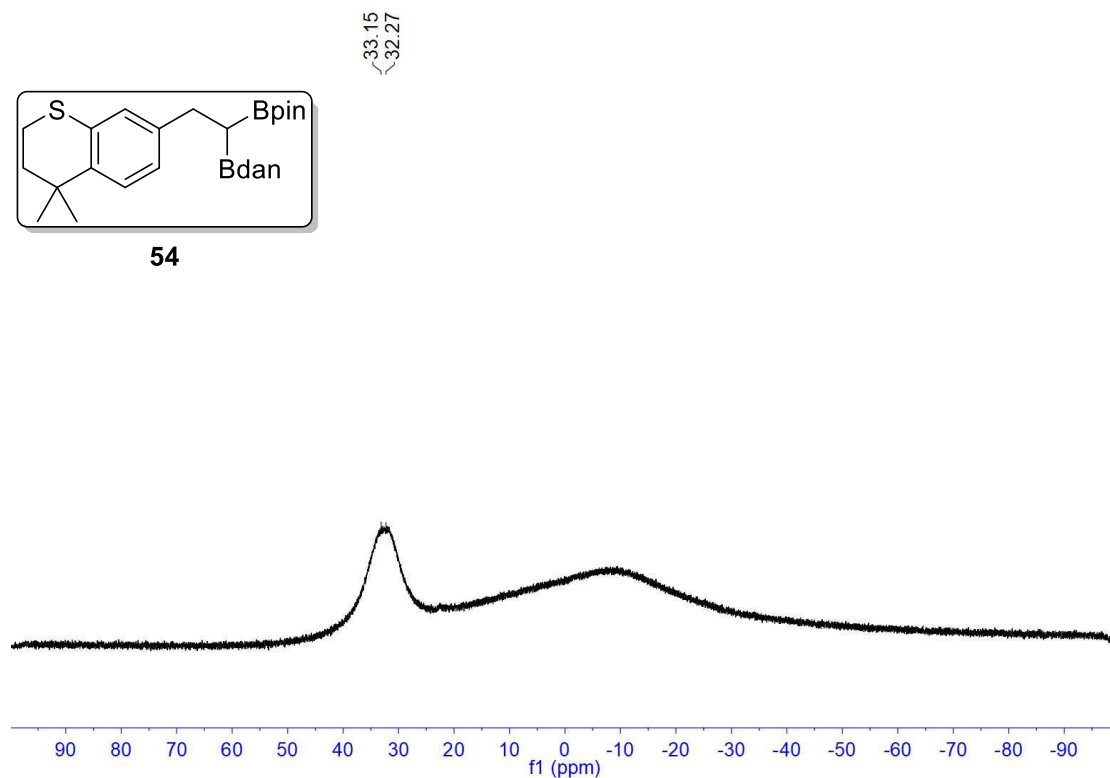

Supplementary Figure 174.  $^{11}\text{B}$  NMR spectrum of compound 54

2-(1-(4,4,5,5-tetramethyl-1,3,2-dioxaborolan-2-yl)-2-(thiophen-3-yl)ethyl)-2,3-dihydro-1H-naphtho[1,8-de][1,3,2]diazaborinine (55)

$^1\text{H}$  NMR (500 MHz, room temperature,  $\text{CDCl}_3$ )

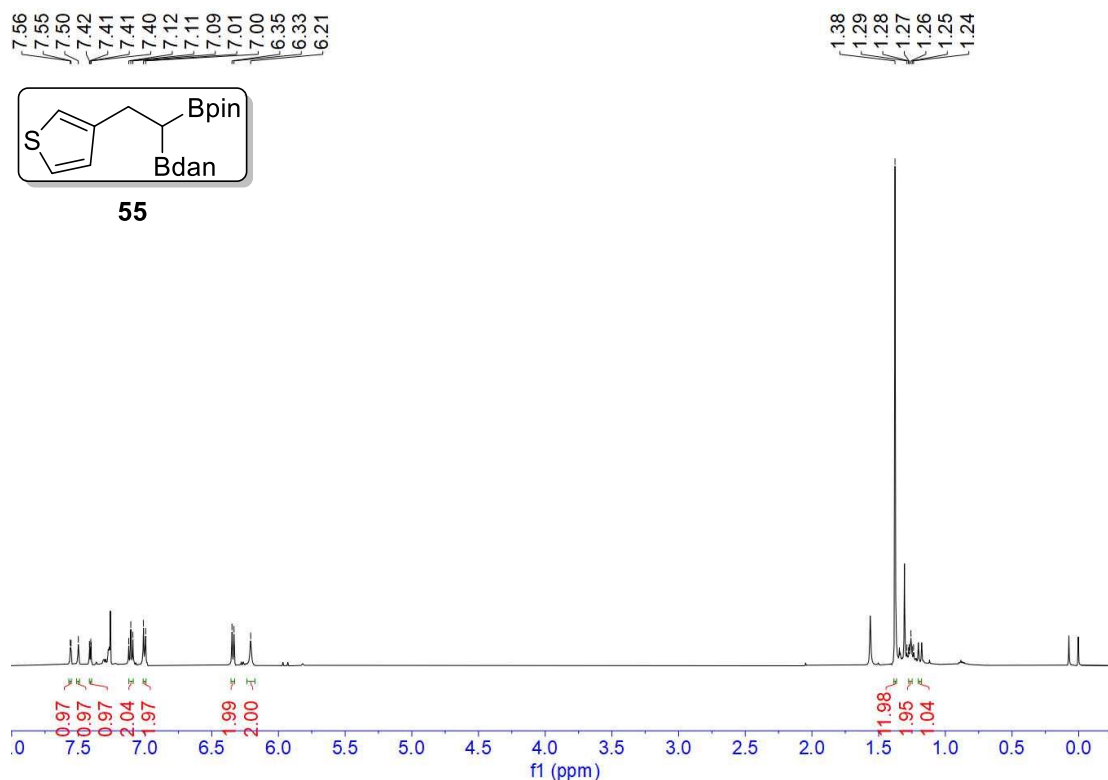

Supplementary Figure 175.  $^1\text{H}$  NMR spectrum of compound 55

$^{13}\text{C}$  NMR (126 MHz, room temperature,  $\text{CDCl}_3$ )

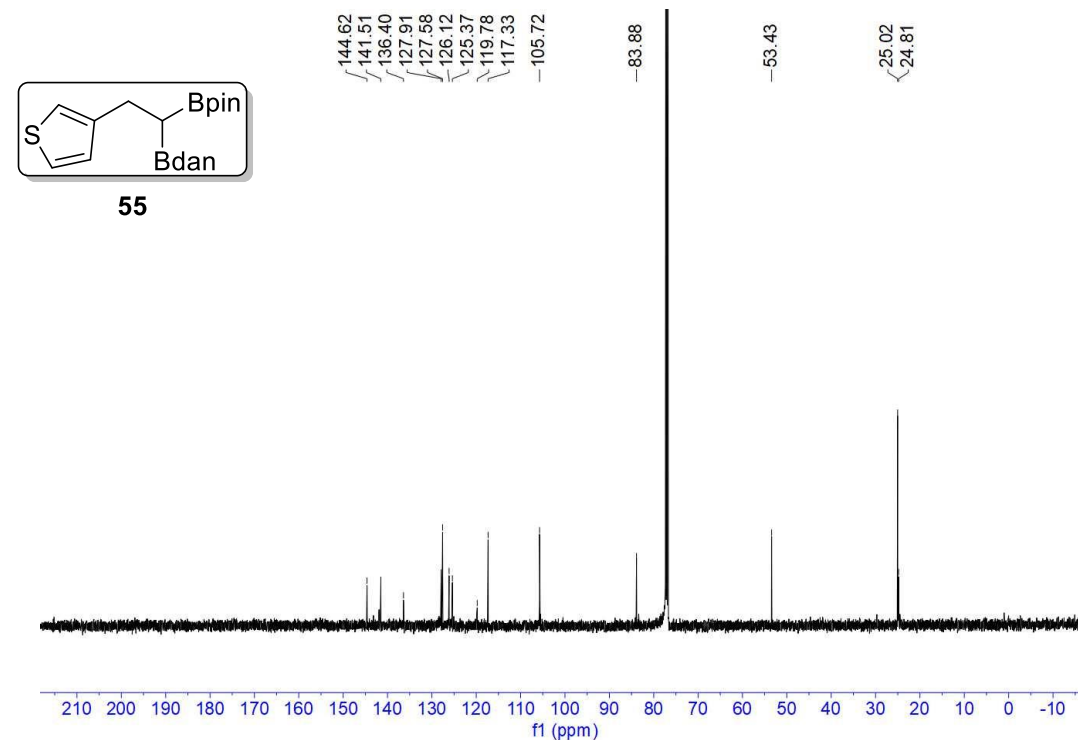

Supplementary Figure 176.  $^{13}\text{C}$  NMR spectrum of compound 55

<sup>11</sup>B NMR (160 MHz, room temperature, CDCl<sub>3</sub>)

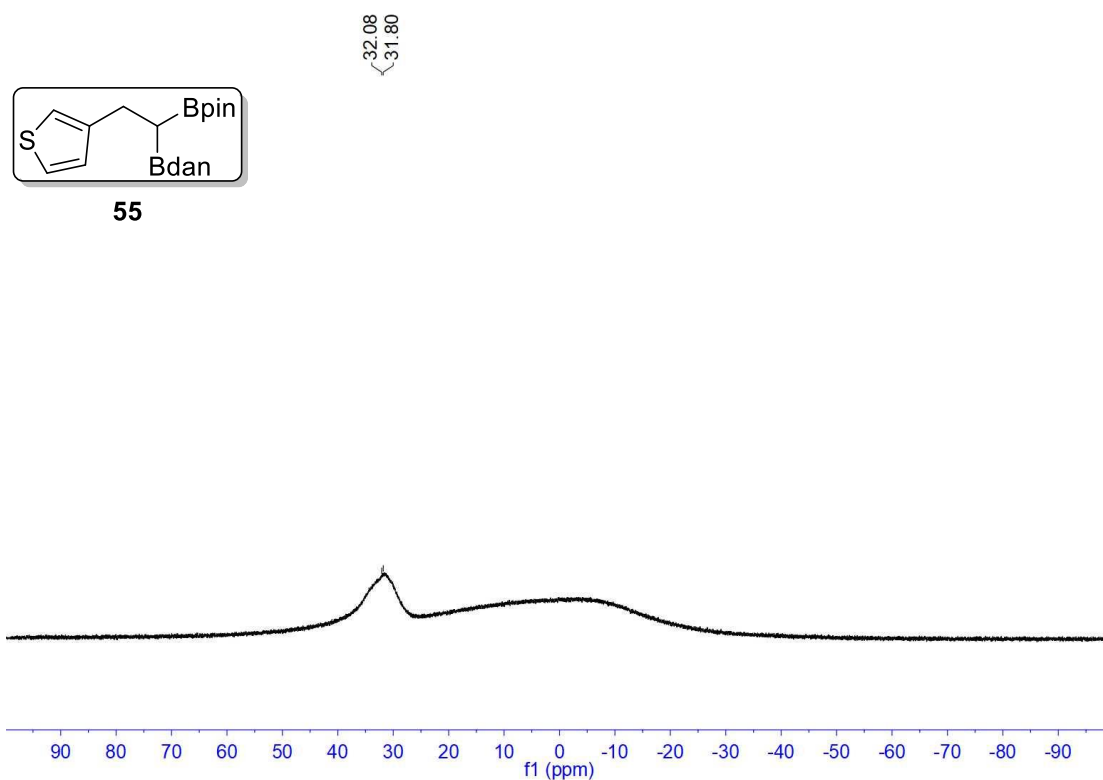

Supplementary Figure 177. <sup>11</sup>B NMR spectrum of compound 55

2-(2-(1H-phenalen-5-yl)-1-(4,4,5,5-tetramethyl-1,3,2-dioxaborolan-2-yl)ethyl)-2,3-dihydro-1H-naphtho[1,8-de][1,3,2]diazaborinine (56)

<sup>1</sup>H NMR (500 MHz, room temperature, CDCl<sub>3</sub>)

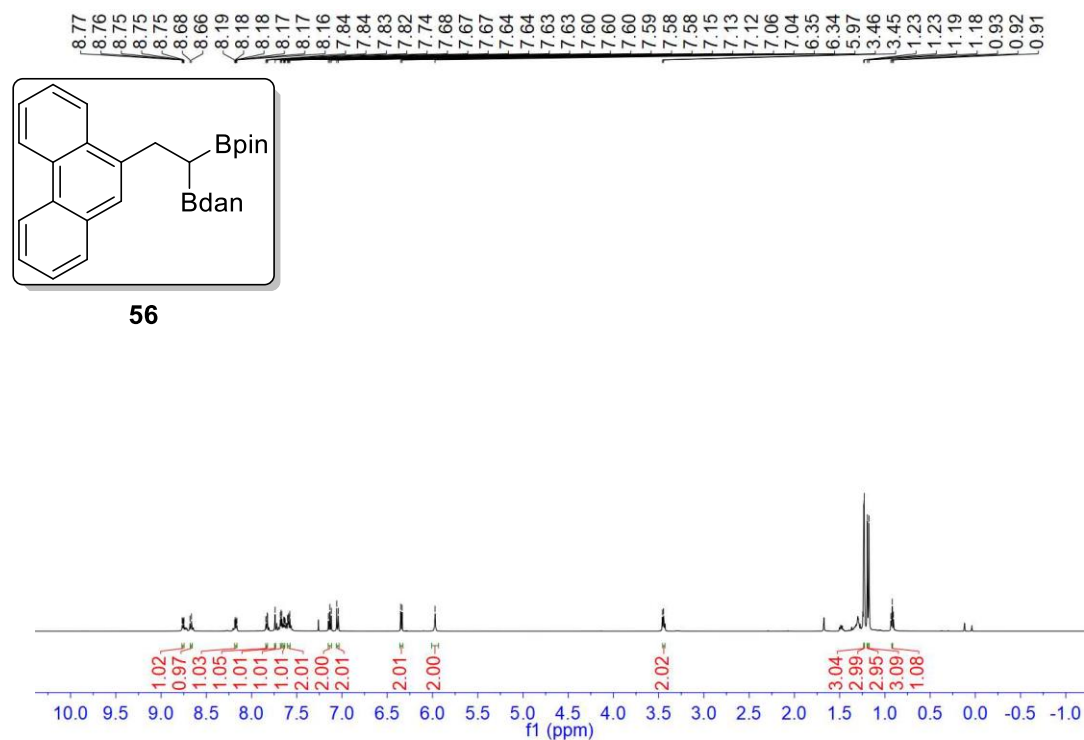

Supplementary Figure 178. <sup>1</sup>H NMR spectrum of compound 56

**<sup>13</sup>C NMR (126 MHz, room temperature, CDCl<sub>3</sub>)**

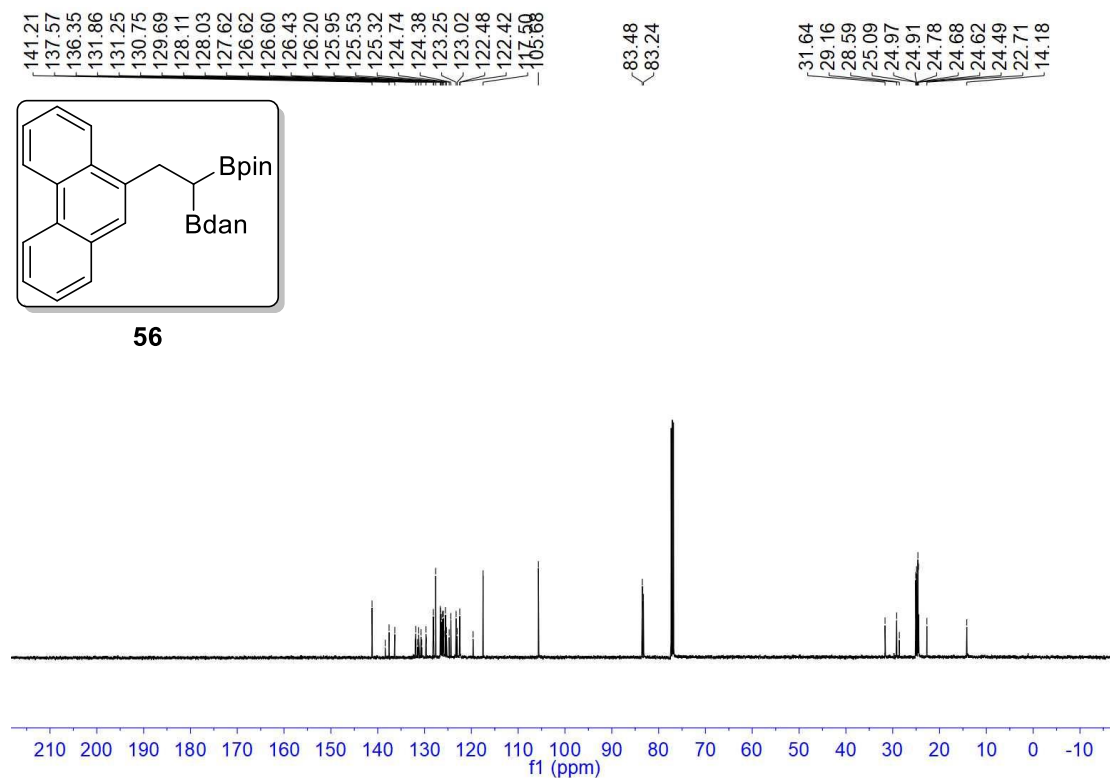

Supplementary Figure 179. <sup>13</sup>C NMR spectrum of compound 56

**<sup>11</sup>B NMR (160 MHz, room temperature, CDCl<sub>3</sub>)**

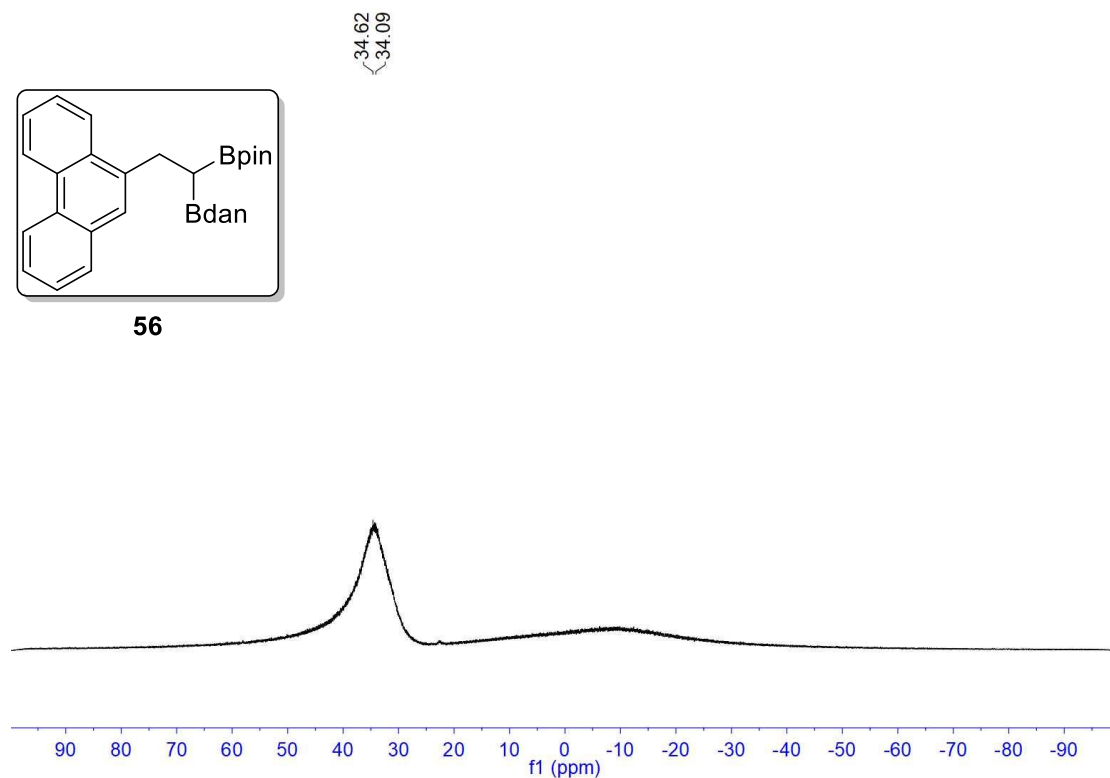

Supplementary Figure 180. <sup>11</sup>B NMR spectrum of compound 56

2-(2-(4-(9H-carbazol-9-yl)phenyl)-1-(4,4,5,5-tetramethyl-1,3,2-dioxaborolan-2-yl)ethyl)-2,3-dihydro-1H-naphtho[1,8-de][1,3,2]diazaborinine (57)

<sup>1</sup>H NMR (500 MHz, room temperature, CDCl<sub>3</sub>)

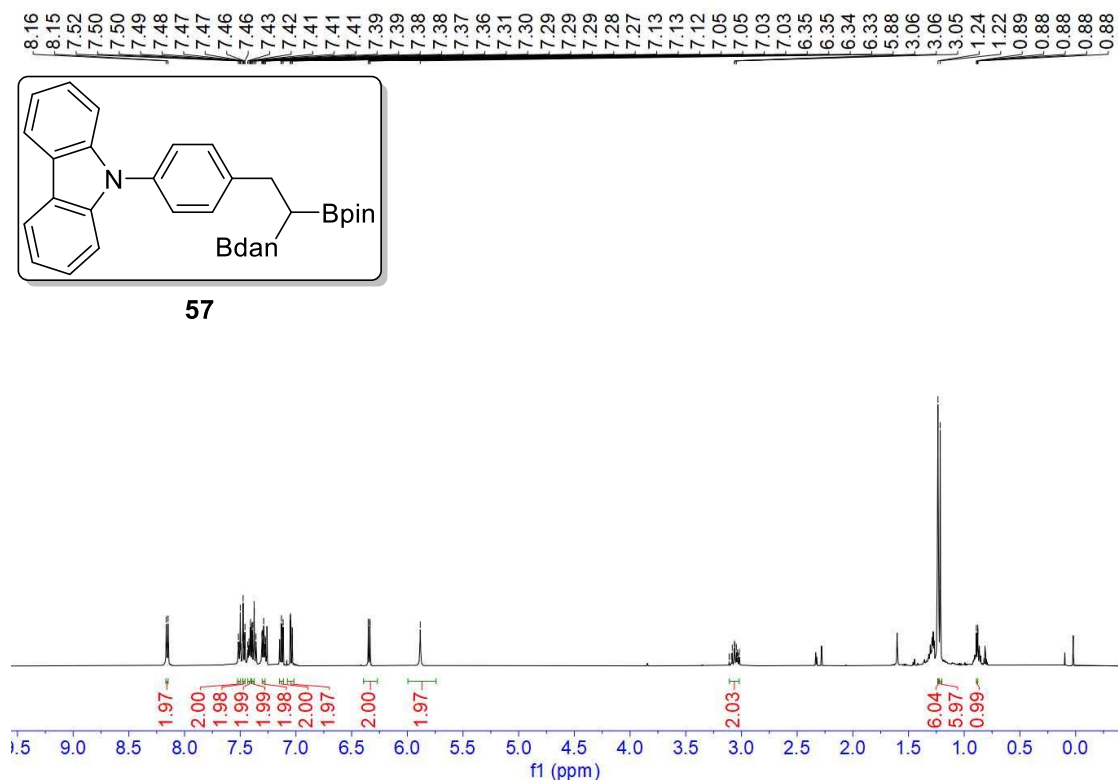

Supplementary Figure 181. <sup>1</sup>H NMR spectrum of compound 57

<sup>13</sup>C NMR (126 MHz, room temperature, CDCl<sub>3</sub>)

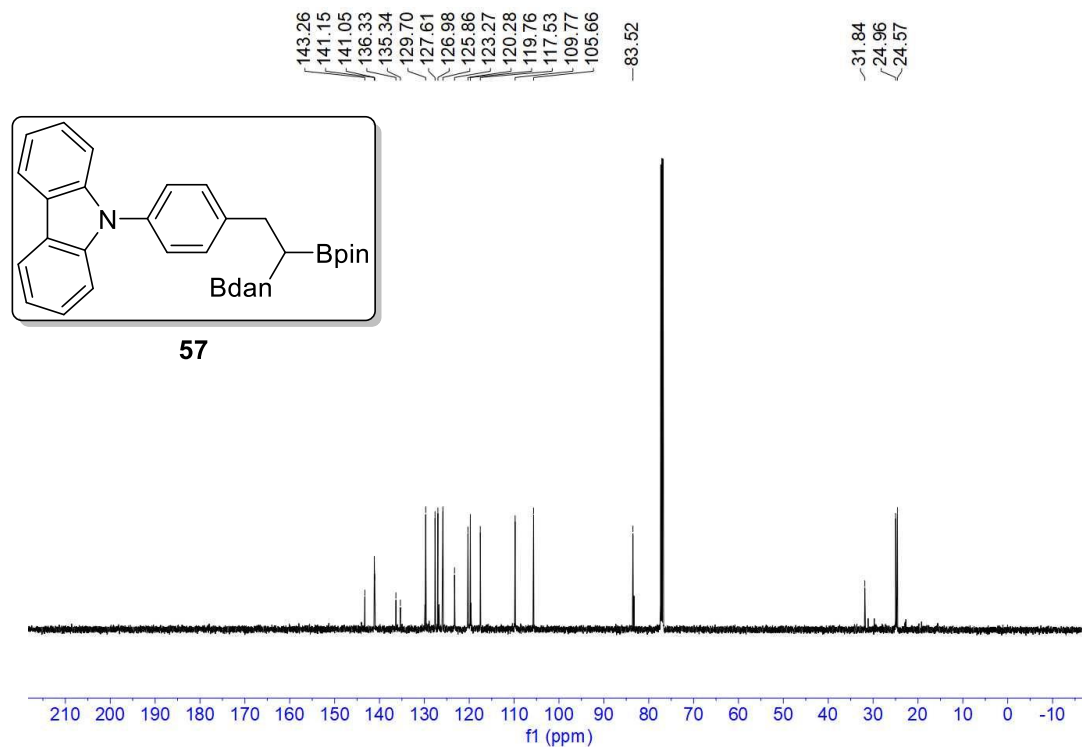

Supplementary Figure 182. <sup>13</sup>C NMR spectrum of compound 57

$^{11}\text{B}$  NMR (160 MHz, room temperature,  $\text{CDCl}_3$ )

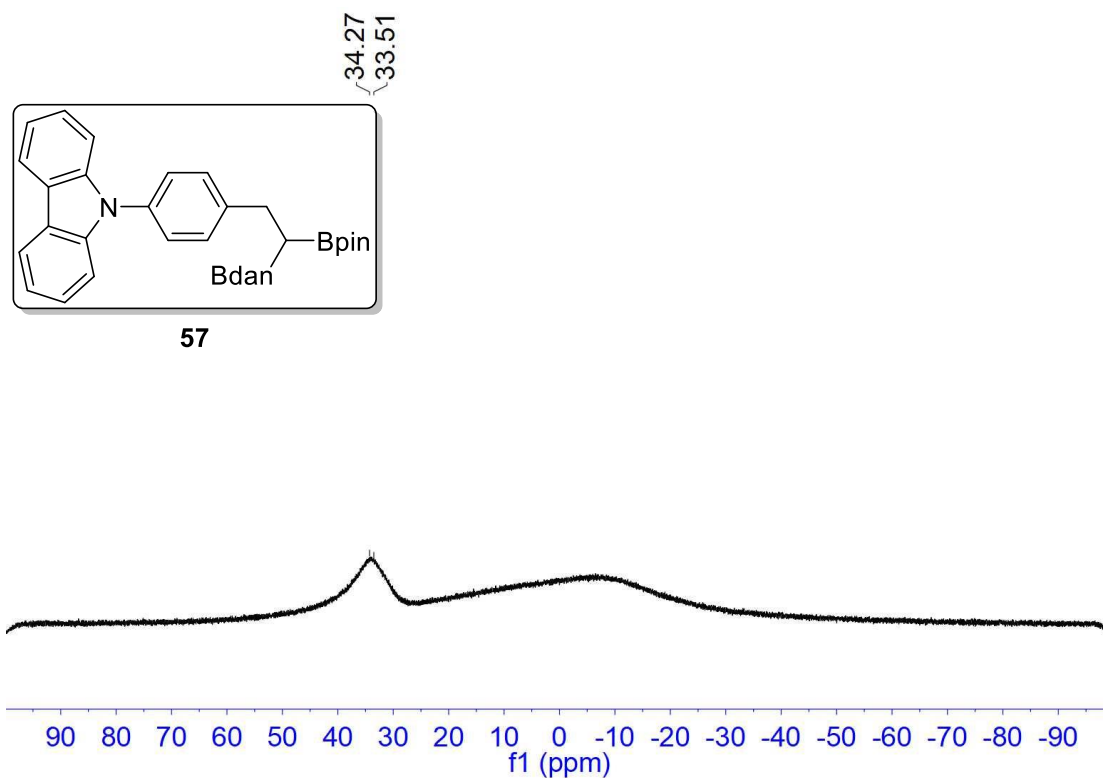

57

Supplementary Figure 183.  $^{11}\text{B}$  NMR spectrum of compound 57

2-(2-(naphthalen-2-yl)-1-(4,4,5,5-tetramethyl-1,3,2-dioxaborolan-2-yl)ethyl)-2,3-dihydro-1H-naphtho[1,8-de][1,3,2]diazaborinine (58)

$^1\text{H}$  NMR (500 MHz, room temperature,  $\text{CDCl}_3$ )

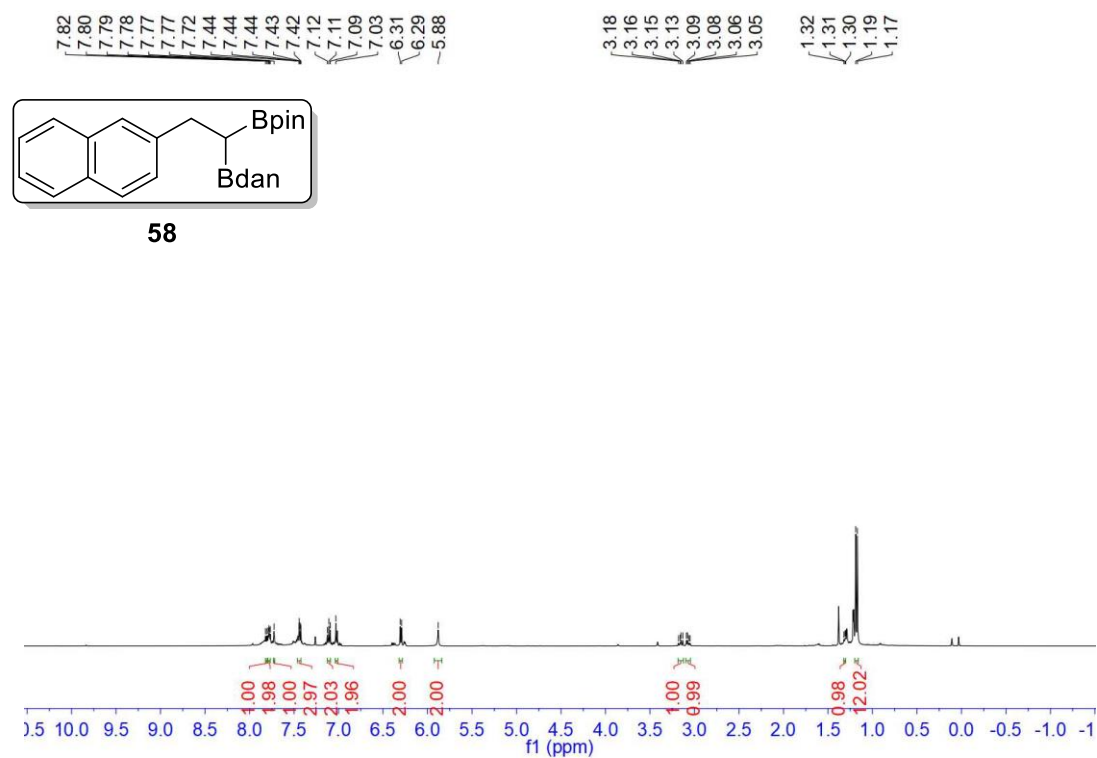

58

Supplementary Figure 184.  $^1\text{H}$  NMR spectrum of compound 58



<sup>13</sup>C NMR (126 MHz, room temperature, CDCl<sub>3</sub>)

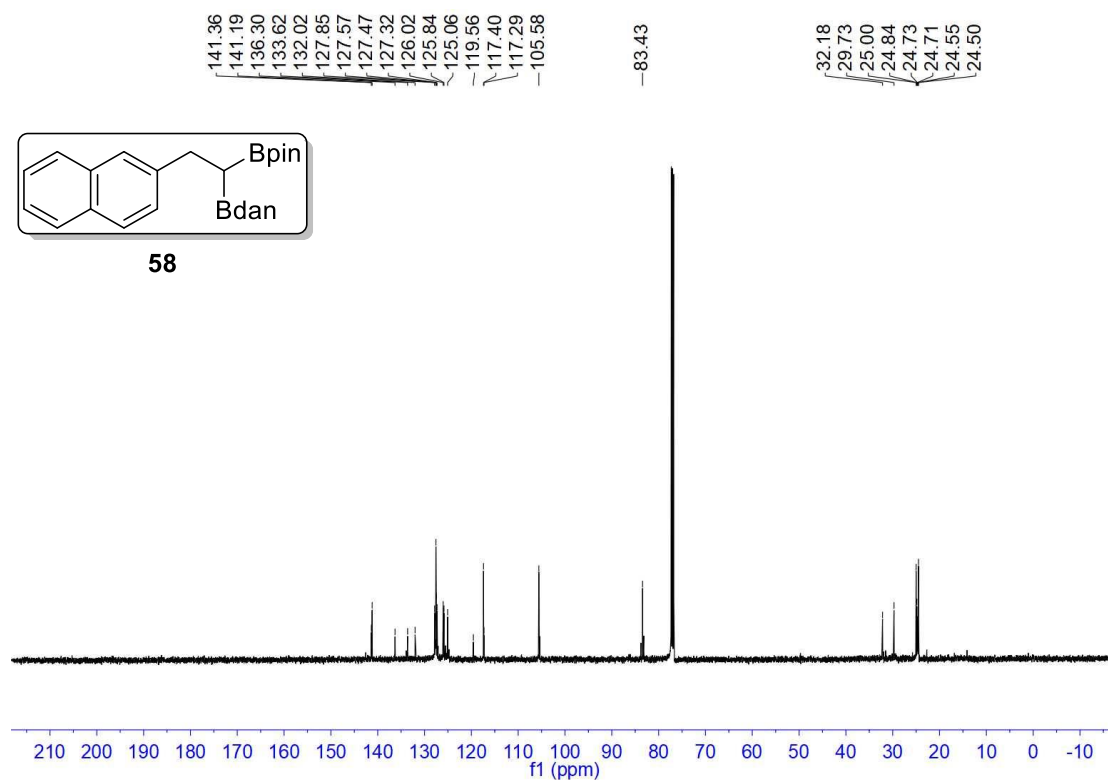

Supplementary Figure 185. <sup>13</sup>C NMR spectrum of compound 58

<sup>11</sup>B NMR (160 MHz, room temperature, CDCl<sub>3</sub>)

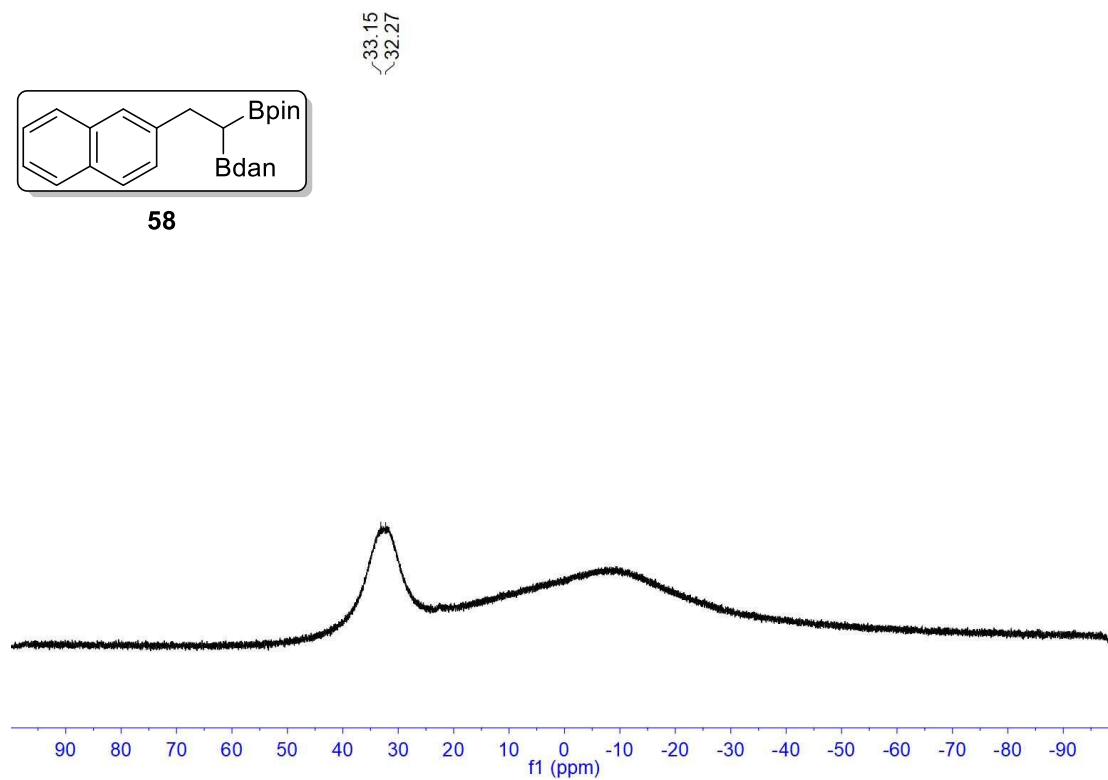

Supplementary Figure 186. <sup>11</sup>B NMR spectrum of compound 58

**(R)-2-(4-phenyl-1-(4,4,5,5-tetramethyl-1,3,2-dioxaborolan-2-yl)butyl)-2,3-dihydro-1H-naphtho[1,8-de][1,3,2]diazaborinine (59)**

**<sup>1</sup>H NMR (500 MHz, room temperature, CDCl<sub>3</sub>)**

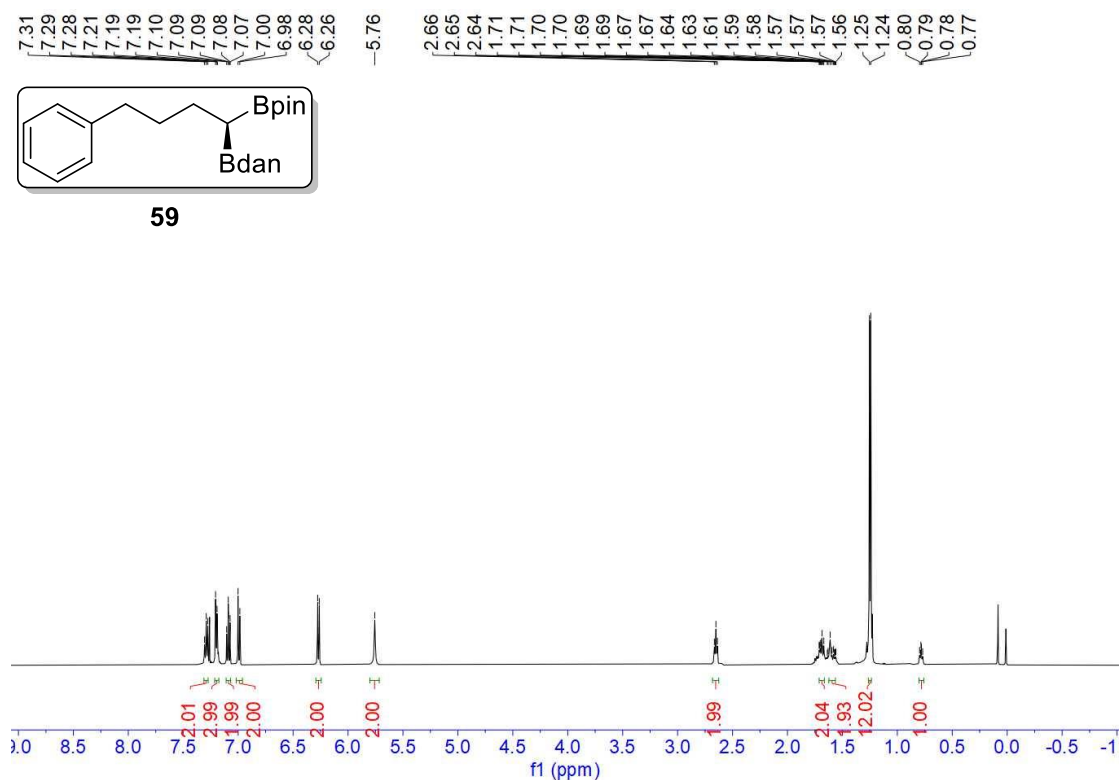

**Supplementary Figure 187. <sup>1</sup>H NMR spectrum of compound 59**

**<sup>13</sup>C NMR (126 MHz, room temperature, CDCl<sub>3</sub>)**

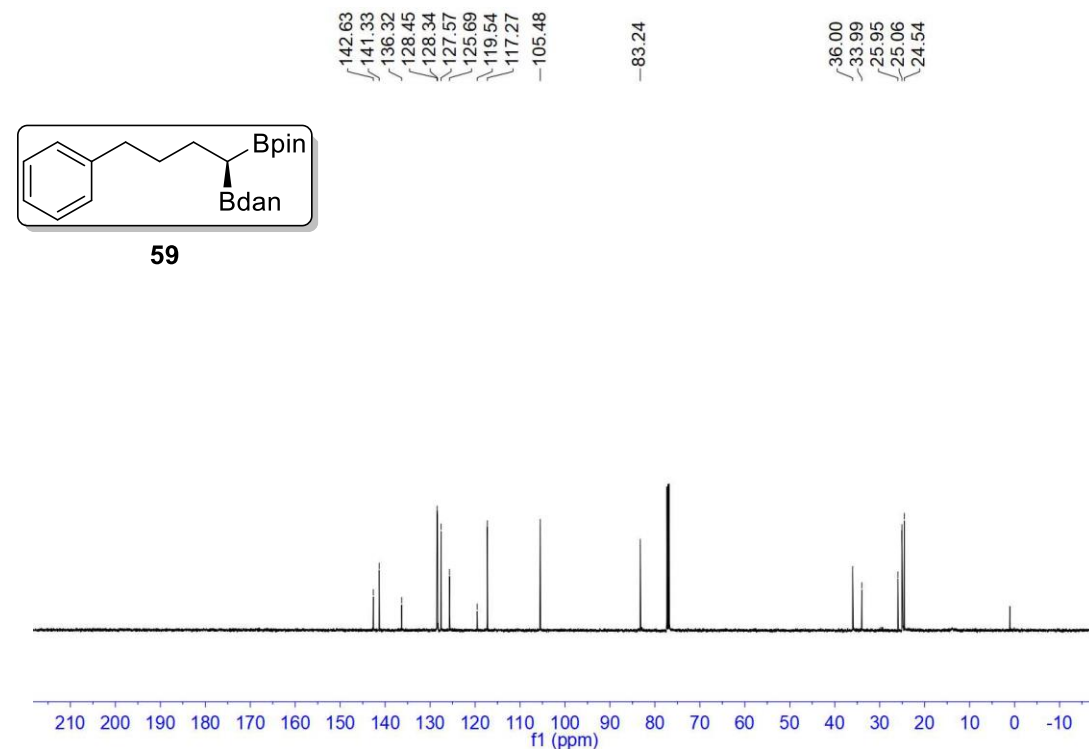

**Supplementary Figure 188. <sup>13</sup>C NMR spectrum of compound 59**

<sup>11</sup>B NMR (160 MHz, room temperature, CDCl<sub>3</sub>)

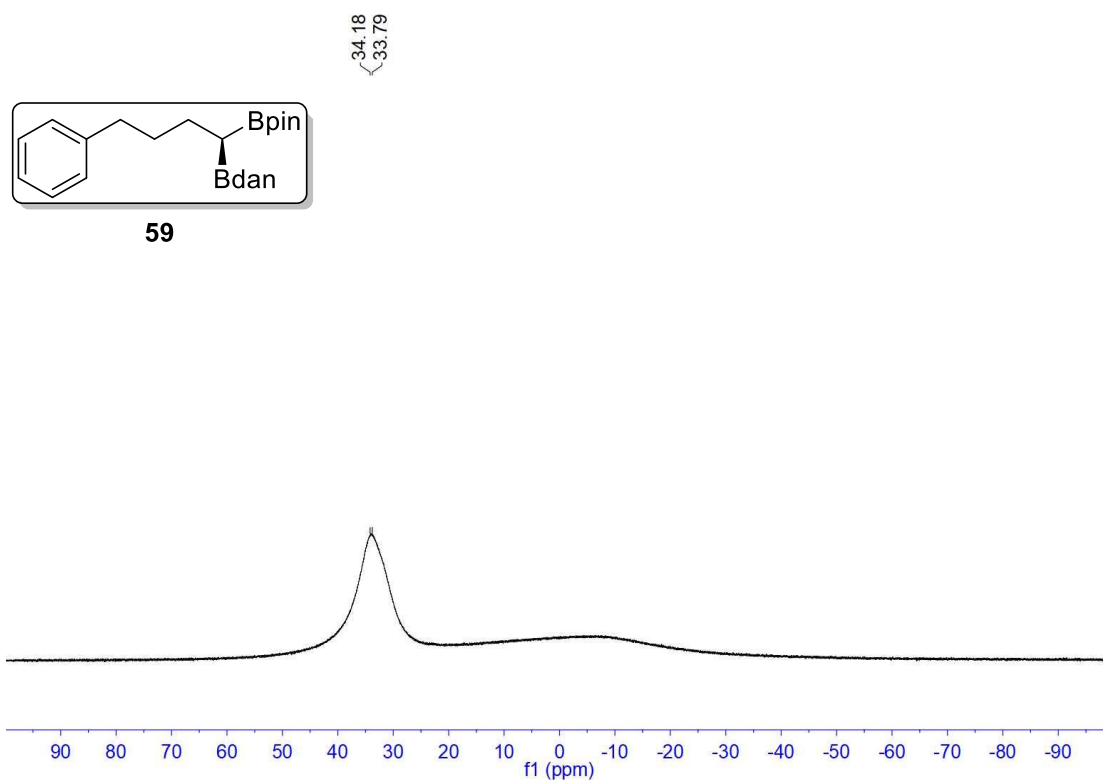

59

Supplementary Figure 189. <sup>11</sup>B NMR spectrum of compound 59

(R)-2-(3-phenyl-1-(4,4,5,5-tetramethyl-1,3,2-dioxaborolan-2-yl)propyl)-2,3-dihydro-1H-naphtho[1,8-de][1,3,2]diazaborinine (60)

<sup>1</sup>H NMR (500 MHz, room temperature, CDCl<sub>3</sub>)

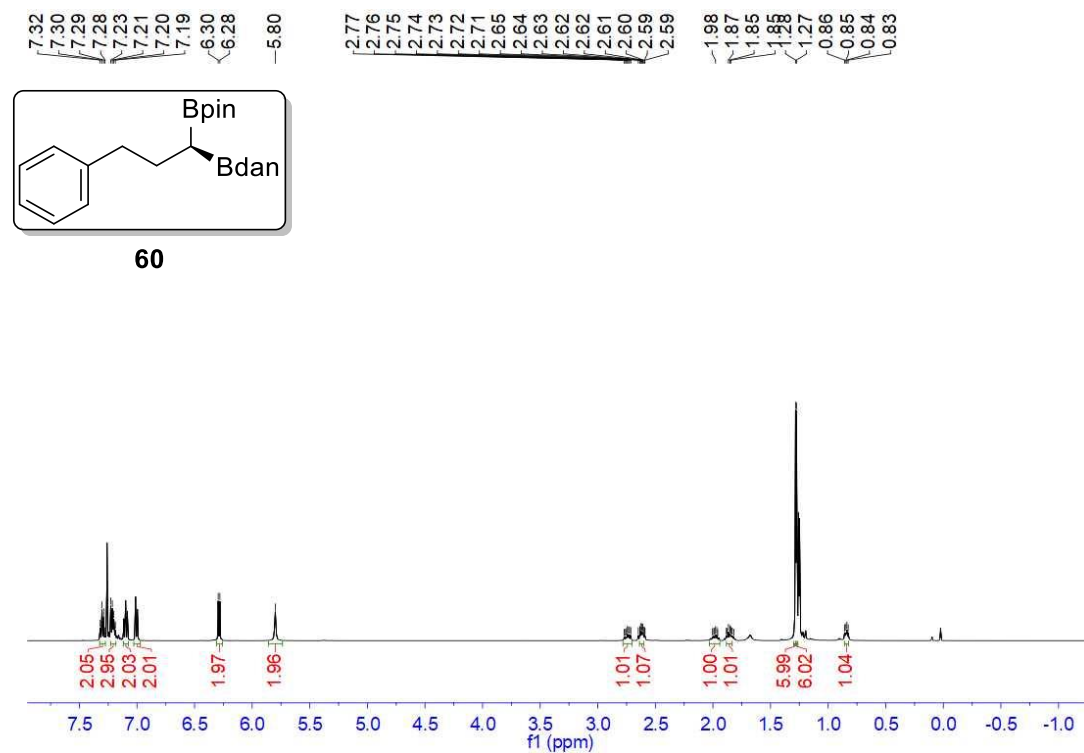

60

Supplementary Figure 190. <sup>1</sup>H NMR spectrum of compound 60

$^{13}\text{C}$  NMR (126 MHz, room temperature,  $\text{CDCl}_3$ )

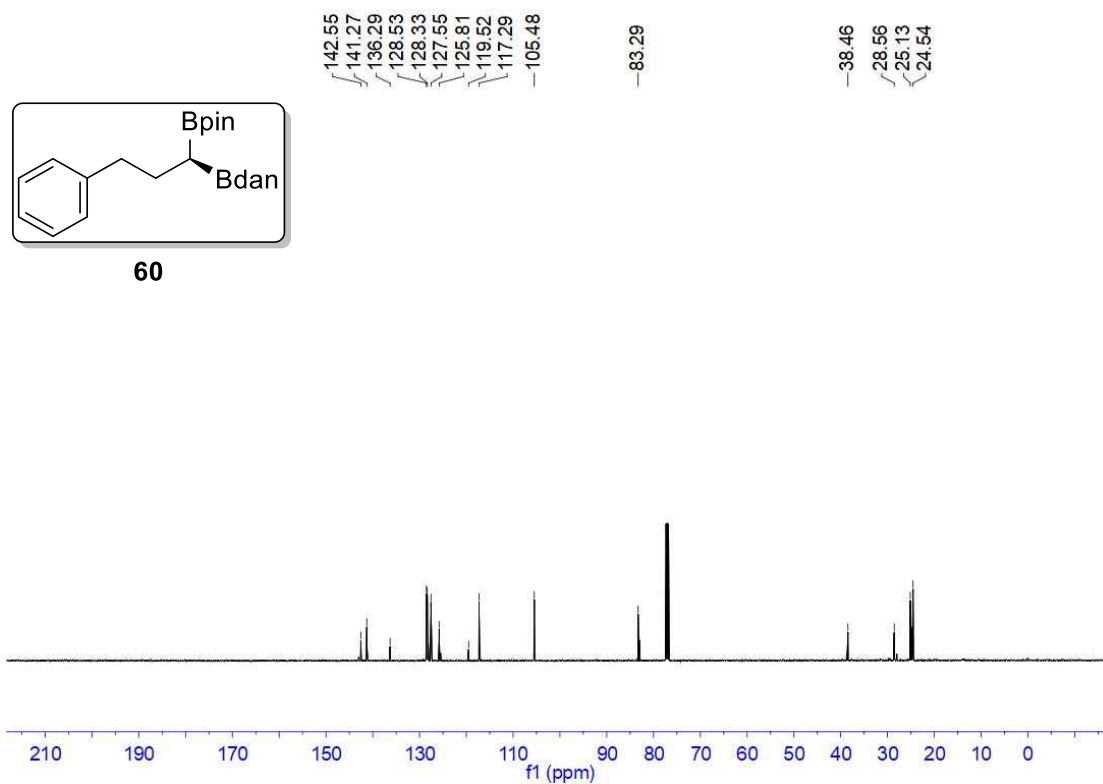

Supplementary Figure 191.  $^{13}\text{C}$  NMR spectrum of compound 60

$^{11}\text{B}$  NMR (160 MHz, room temperature,  $\text{CDCl}_3$ )

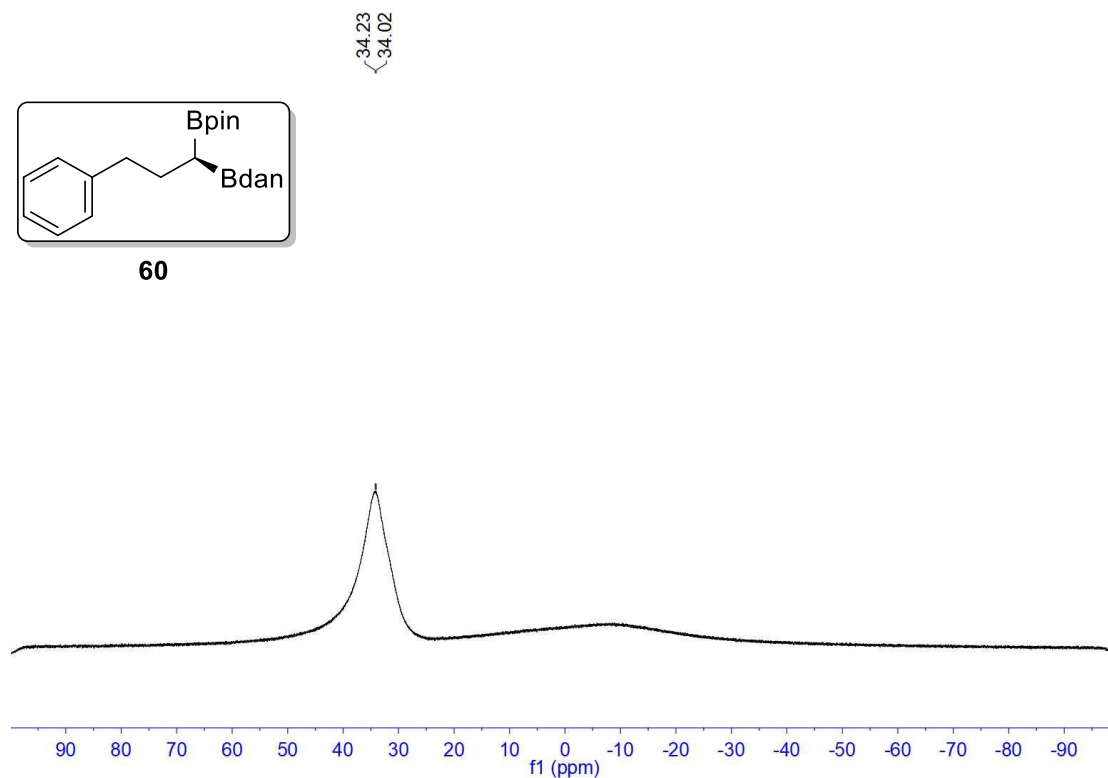

Supplementary Figure 192.  $^{11}\text{B}$  NMR spectrum of compound 60

**(R)-2-(2-cyclohexyl-1-(4,4,5,5-tetramethyl-1,3,2-dioxaborolan-2-yl)ethyl)-2,3-dihydro-1H-naphtho[1,8-de][1,3,2]diazaborinine (61)**

**<sup>1</sup>H NMR (500 MHz, room temperature, CDCl<sub>3</sub>)**

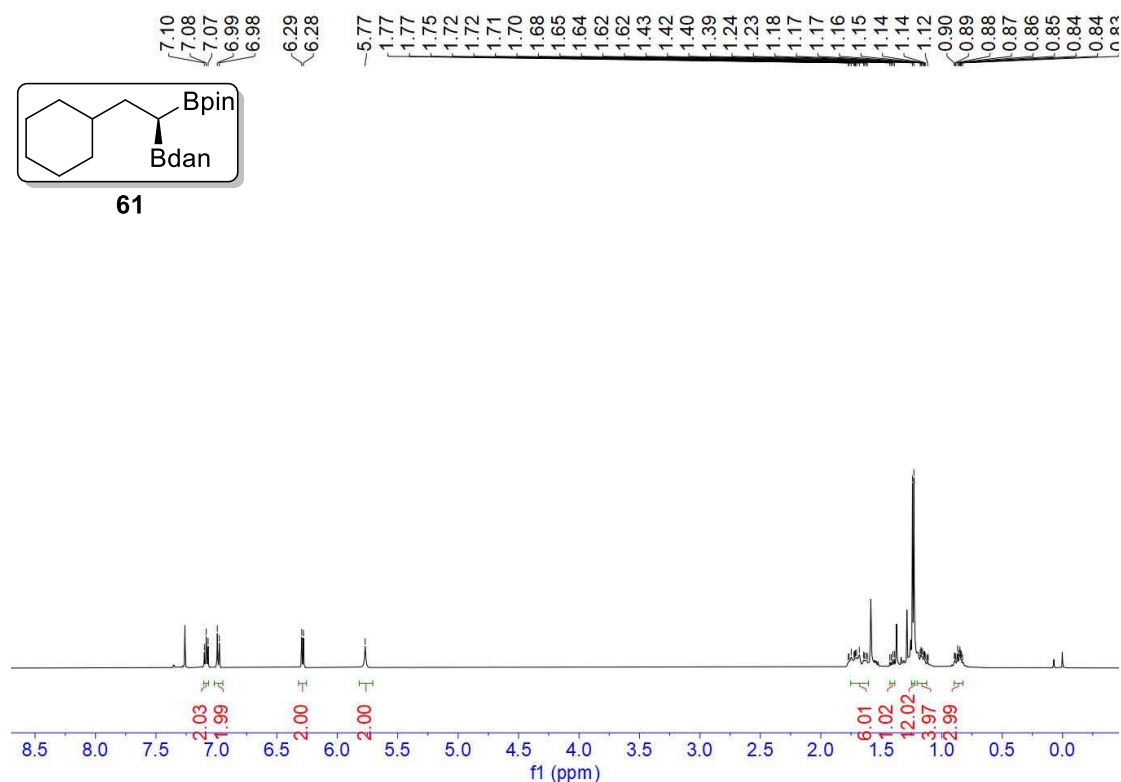

**<sup>13</sup>C NMR (126 MHz, room temperature, CDCl<sub>3</sub>)**

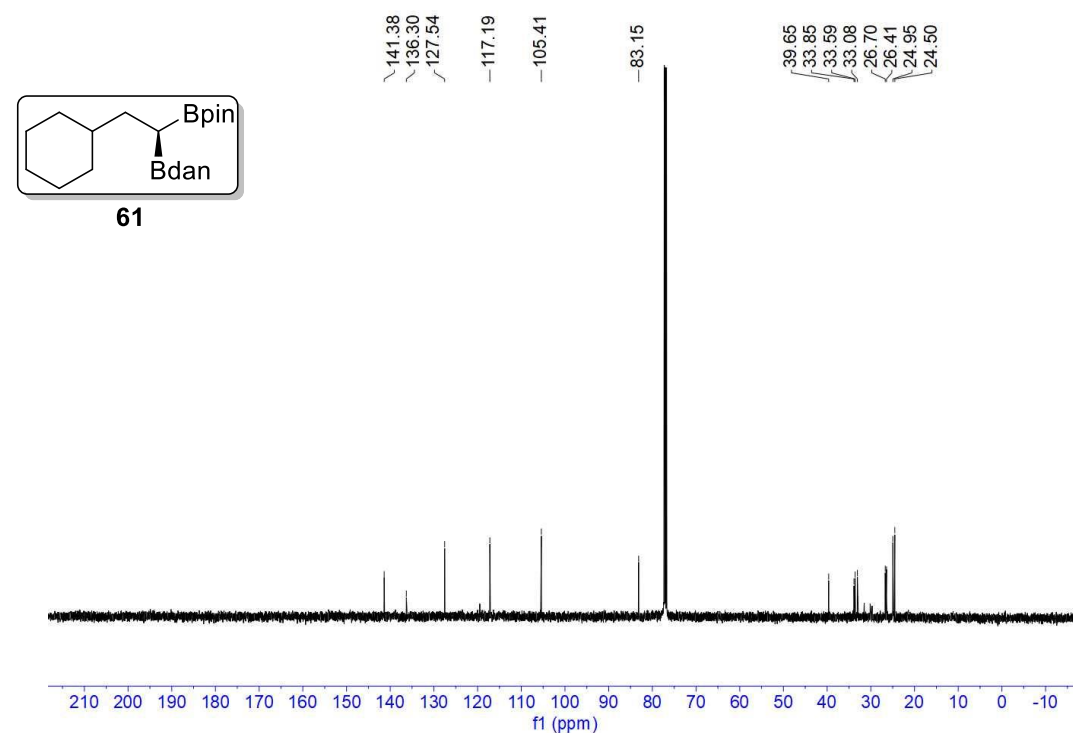

<sup>11</sup>B NMR (160 MHz, room temperature, CDCl<sub>3</sub>)

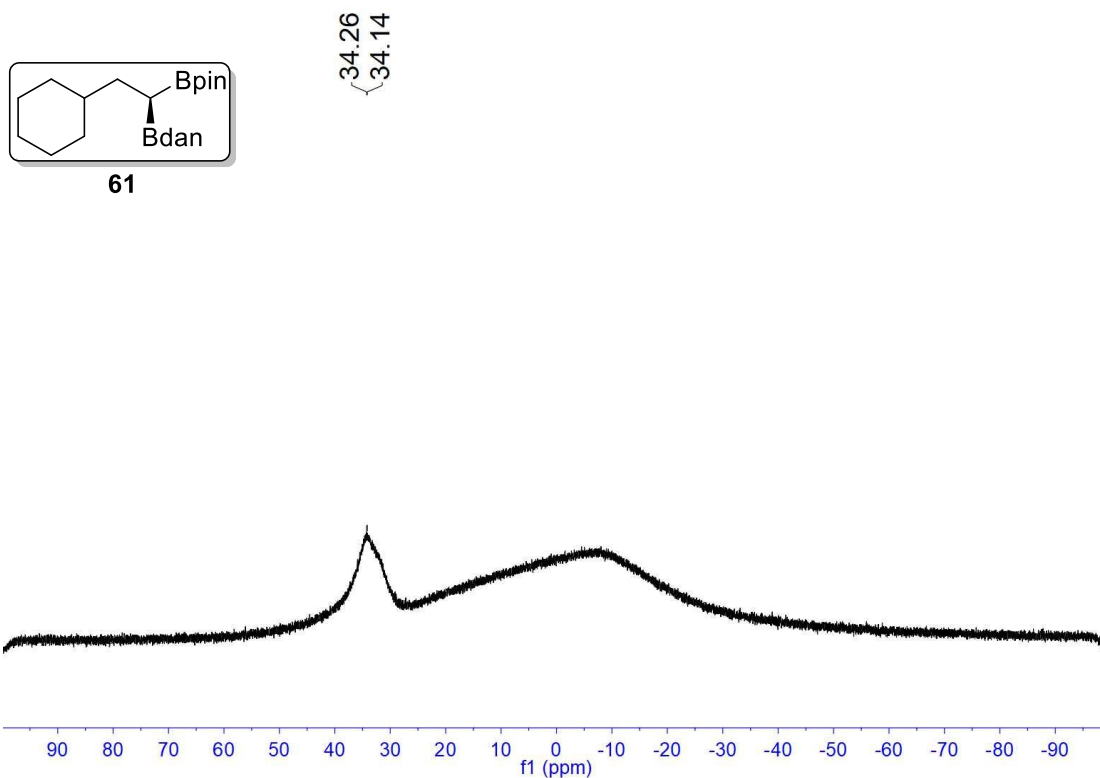

Supplementary Figure 195. <sup>11</sup>B NMR spectrum of compound 61

(R)-2-(2-cyclopentyl-1-(4,4,5,5-tetramethyl-1,3,2-dioxaborolan-2-yl)ethyl)-2,3-dihydro-1H-naphtho[1,8-de][1,3,2]diazaborinine (62)

<sup>1</sup>H NMR (500 MHz, room temperature, CDCl<sub>3</sub>)

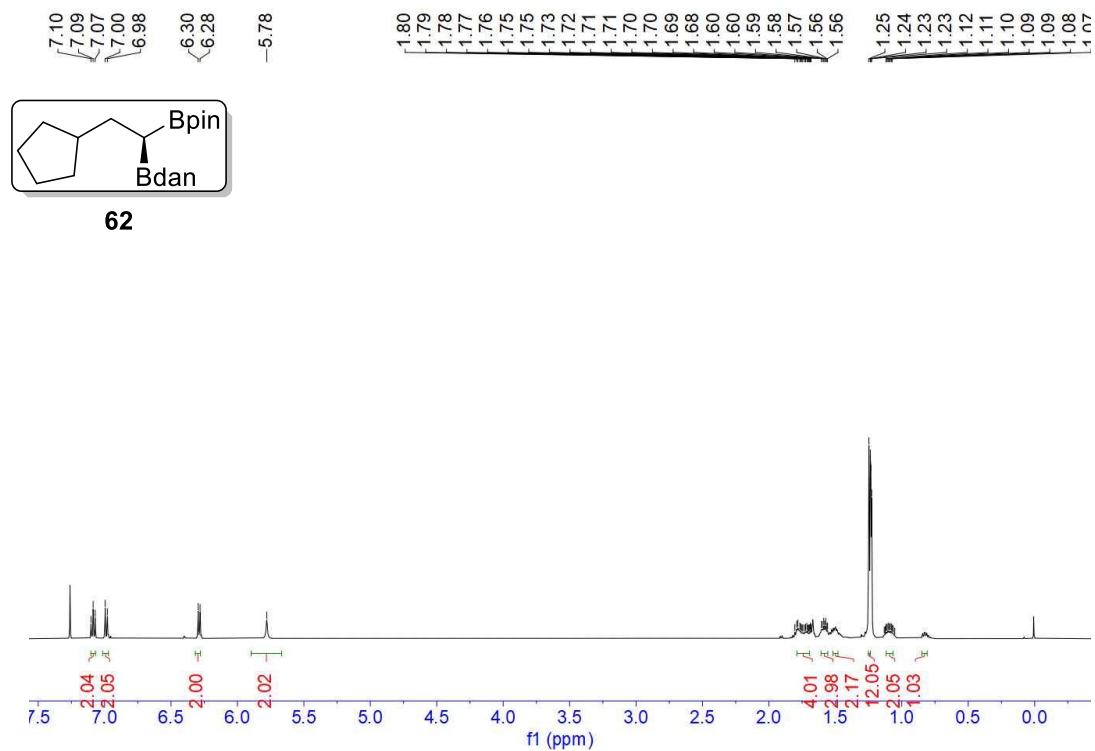

Supplementary Figure 196. <sup>1</sup>H NMR spectrum of compound 62

$^{13}\text{C}$  NMR (126 MHz, room temperature,  $\text{CDCl}_3$ )

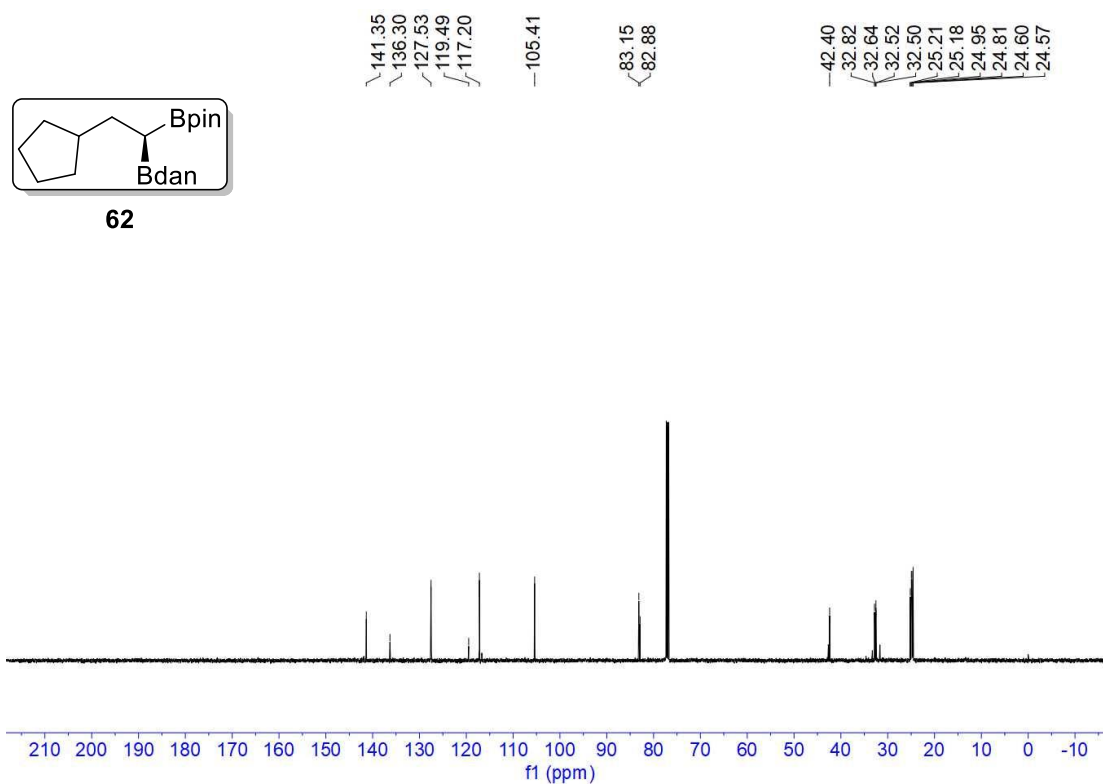

Supplementary Figure 197.  $^{13}\text{C}$  NMR spectrum of compound 62

$^{11}\text{B}$  NMR (160 MHz, room temperature,  $\text{CDCl}_3$ )

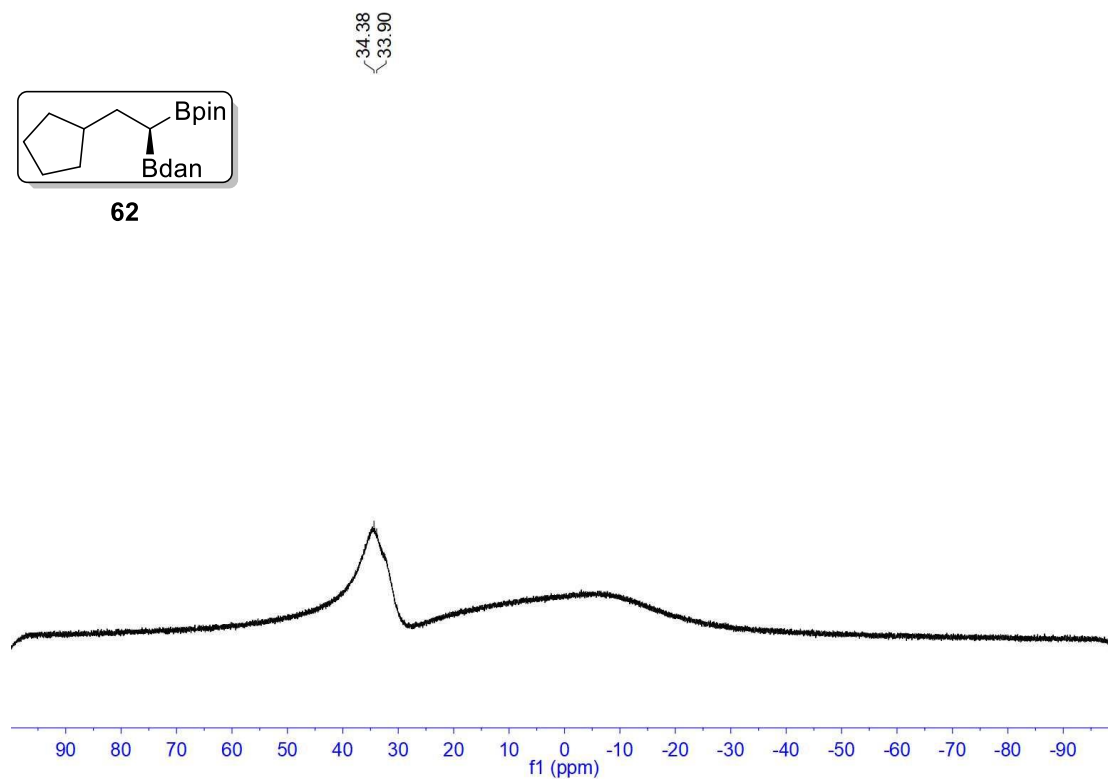

Supplementary Figure 198.  $^{11}\text{B}$  NMR spectrum of compound 62

**(R)-2-(2-cyclopropyl-1-(4,4,5,5-tetramethyl-1,3,2-dioxaborolan-2-yl)ethyl)-2,3-dihydro-1H-naphtho[1,8-de][1,3,2]diazaborinine (63)**

**<sup>1</sup>H NMR (500 MHz, room temperature, CDCl<sub>3</sub>)**

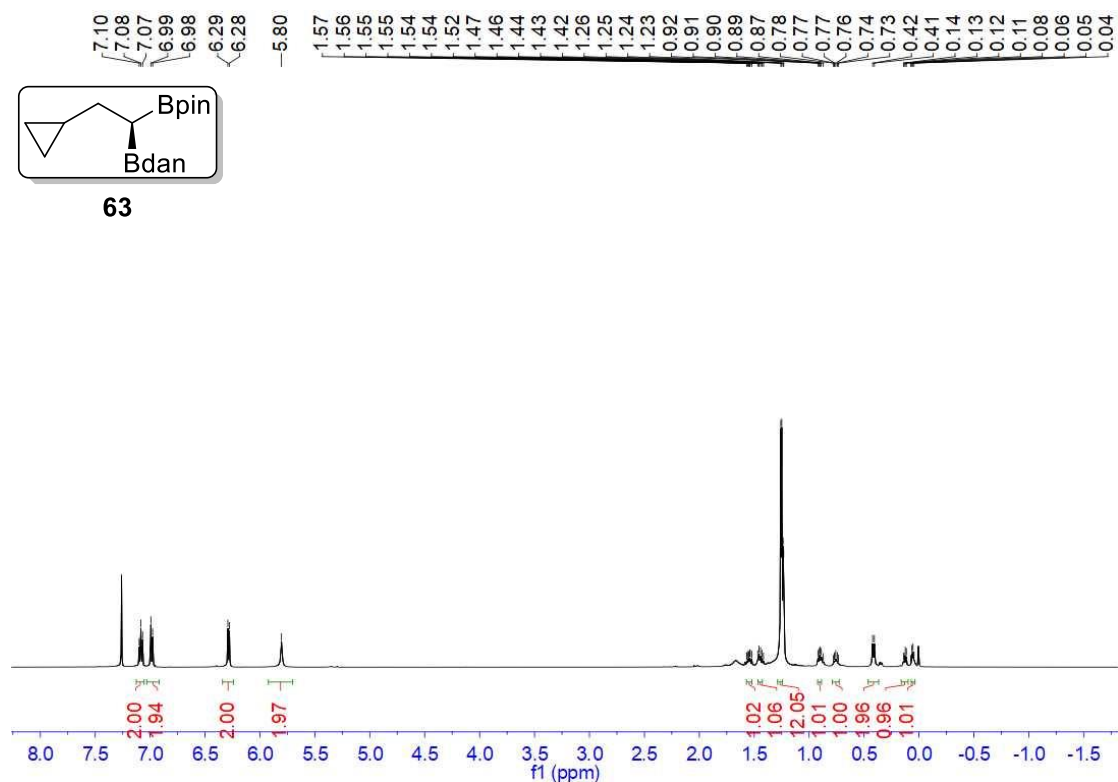

**Supplementary Figure 199. <sup>1</sup>H NMR spectrum of compound 63**

**<sup>13</sup>C NMR (126 MHz, room temperature, CDCl<sub>3</sub>)**

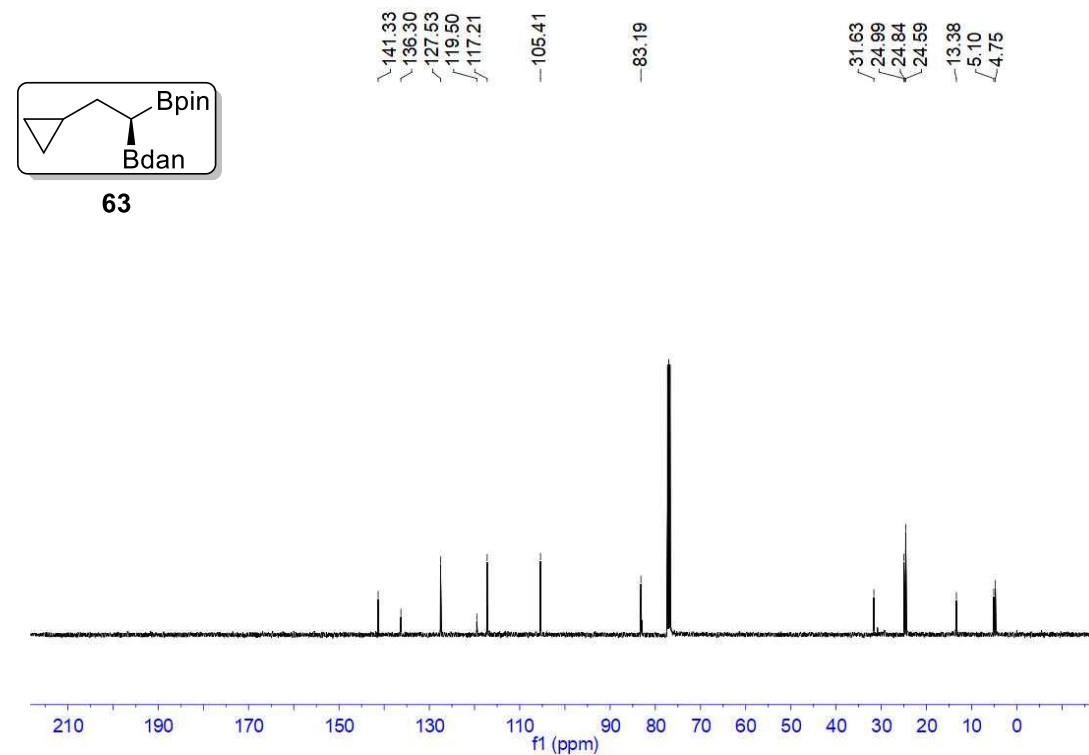

**Supplementary Figure 200. <sup>13</sup>C NMR spectrum of compound 63**



$^{11}\text{B}$  NMR (160 MHz, room temperature,  $\text{CDCl}_3$ )

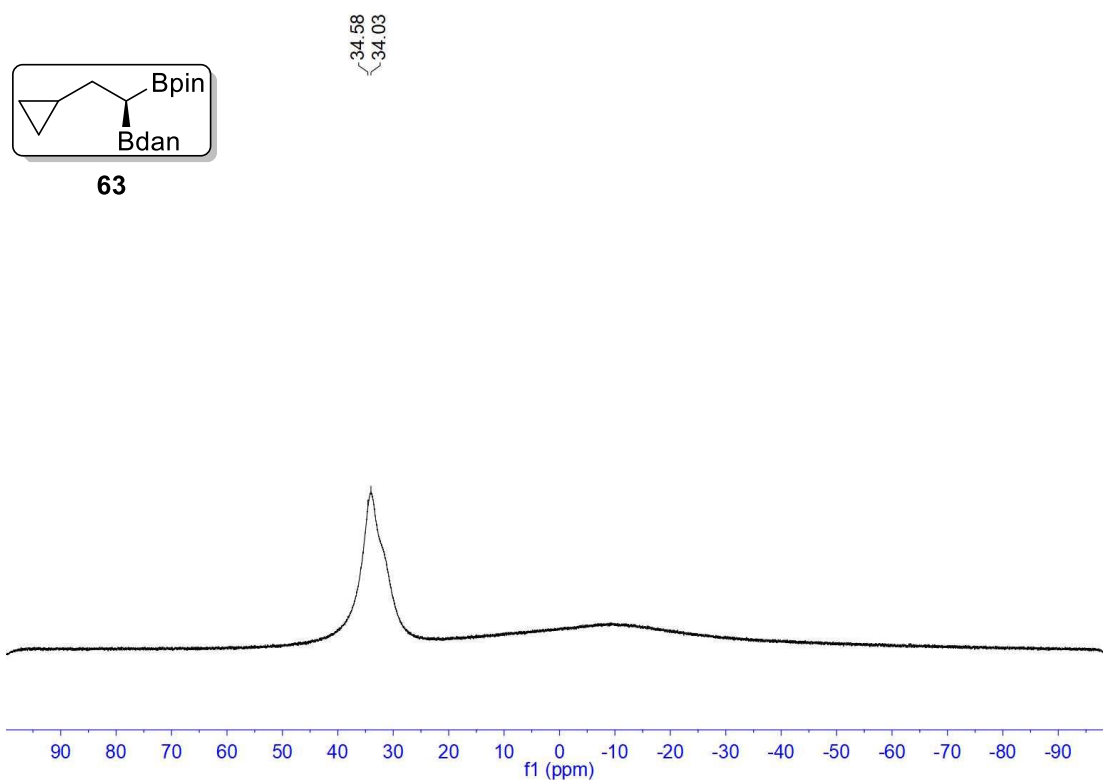

63

Supplementary Figure 201.  $^{11}\text{B}$  NMR spectrum of compound 63

(R)-2-(3,3-dimethyl-1-(4,4,5,5-tetramethyl-1,3,2-dioxaborolan-2-yl)butyl)-2,3-dihydro-1H-naphtho[1,8-de][1,3,2]diazaborinine (64)

$^1\text{H}$  NMR (500 MHz, room temperature,  $\text{CDCl}_3$ )

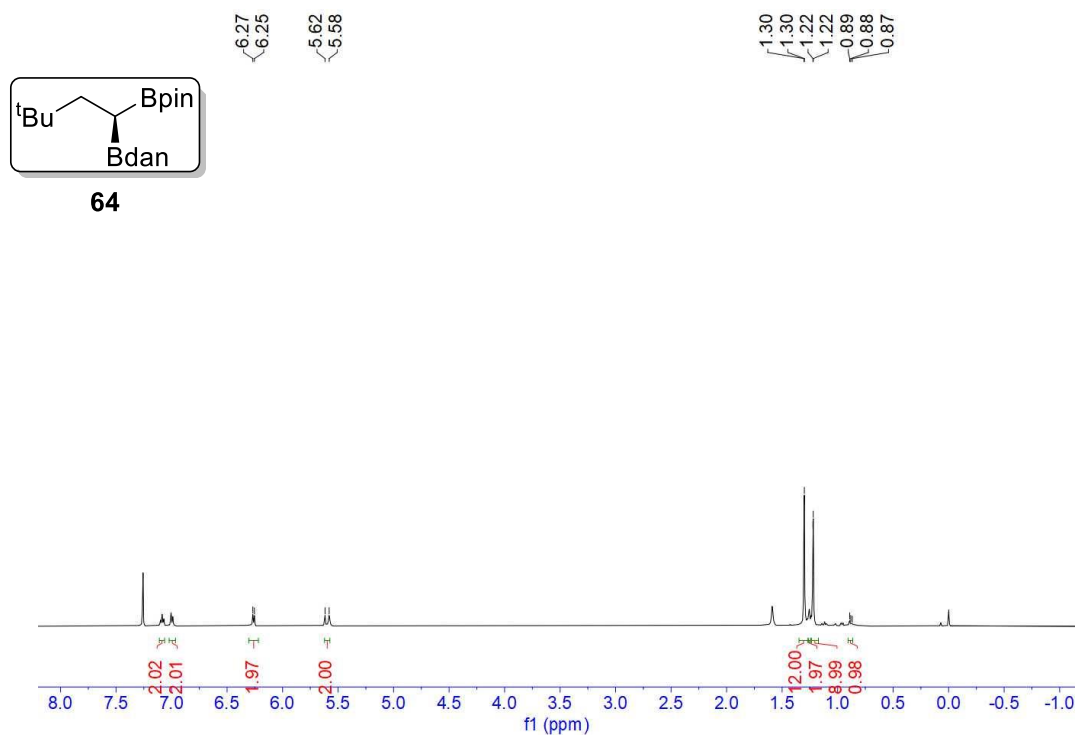

64

Supplementary Figure 202.  $^1\text{H}$  NMR spectrum of compound 64

$^{13}\text{C}$  NMR (126 MHz, room temperature,  $\text{CDCl}_3$ )

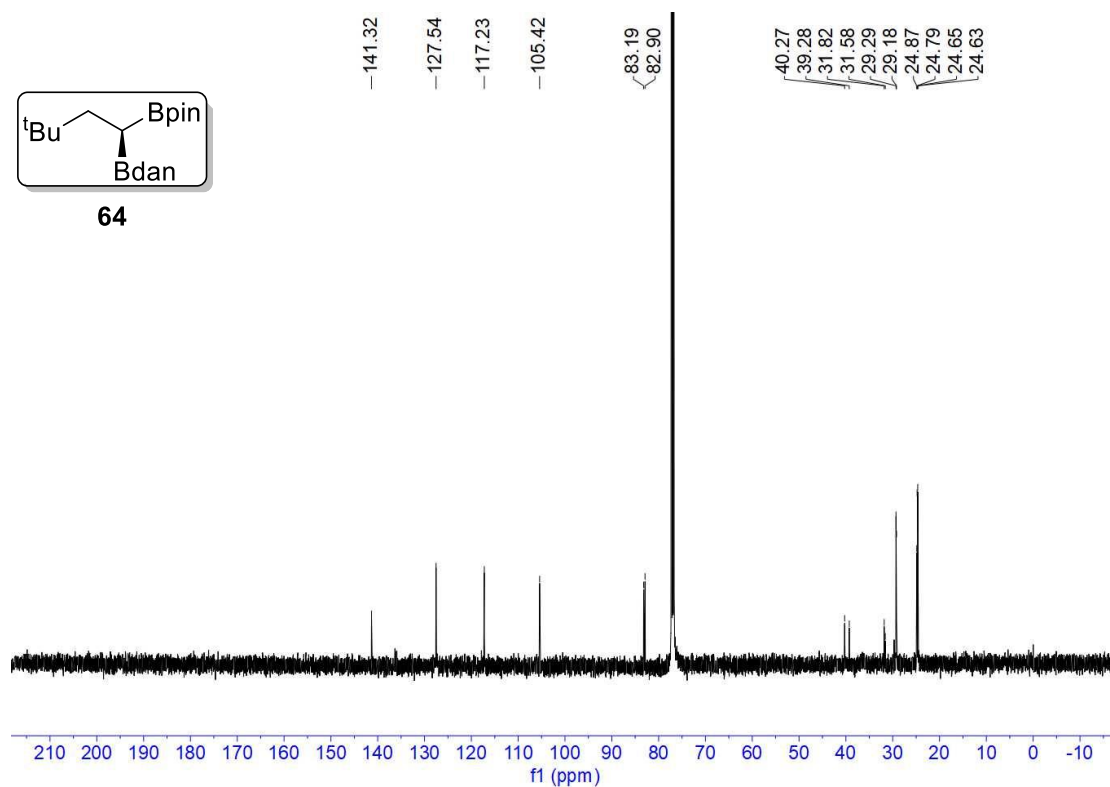

Supplementary Figure 203.  $^{13}\text{C}$  NMR spectrum of compound 64

$^{11}\text{B}$  NMR (160 MHz, room temperature,  $\text{CDCl}_3$ )

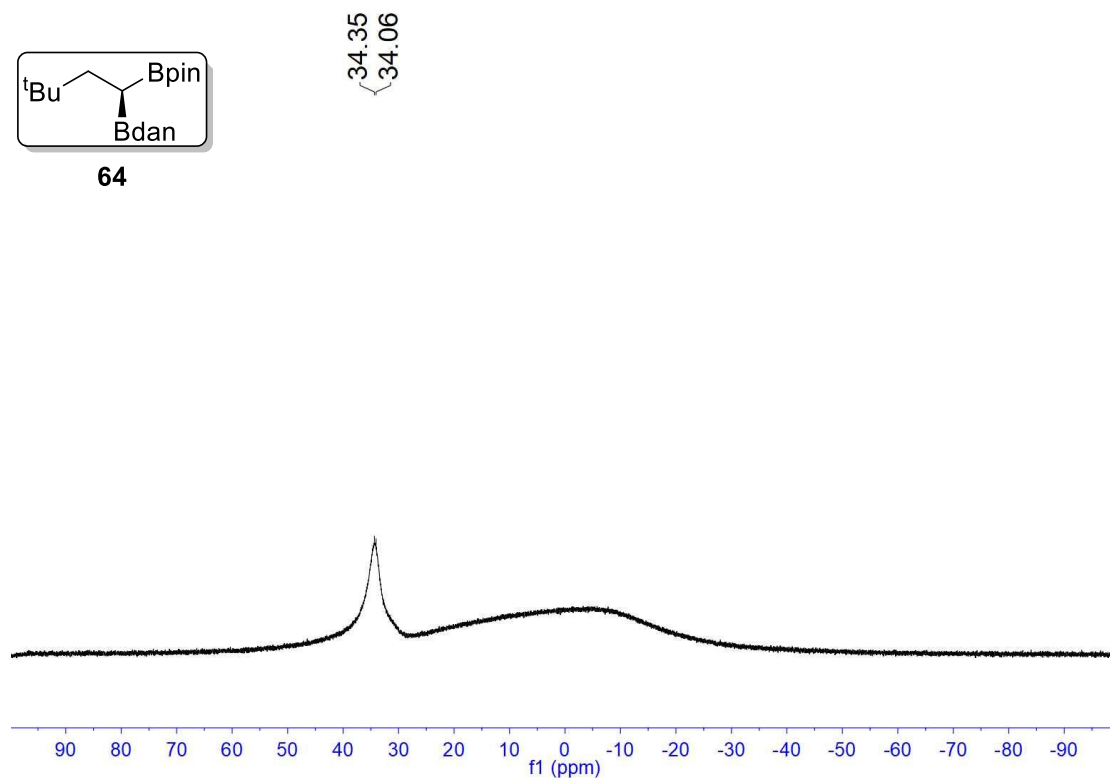

Supplementary Figure 204.  $^{11}\text{B}$  NMR spectrum of compound 64

(R)-2-(1-(4,4,5,5-tetramethyl-1,3,2-dioxaborolan-2-yl)pentyl)-2,3-dihydro-1H-naphtho[1,8-de][1,3,2]diazaborinine (65)

$^1\text{H}$  NMR (500 MHz, room temperature,  $\text{CDCl}_3$ )

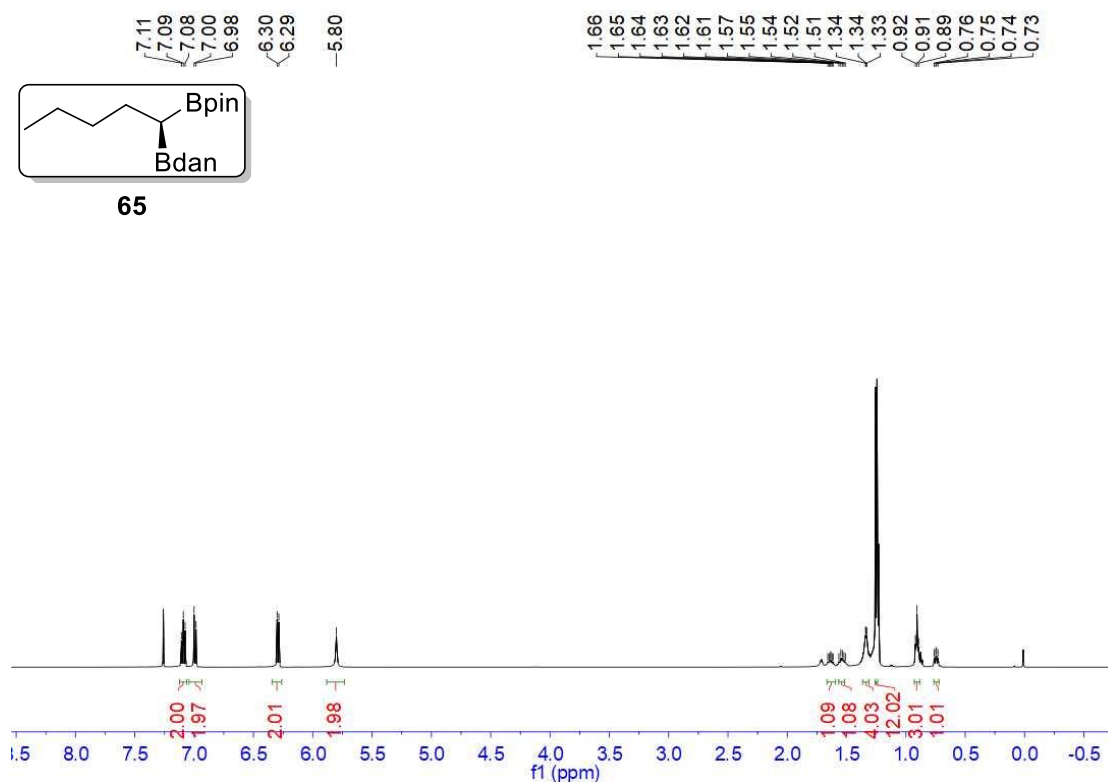

Supplementary Figure 205.  $^1\text{H}$  NMR spectrum of compound 65

$^{13}\text{C}$  NMR (126 MHz, room temperature,  $\text{CDCl}_3$ )

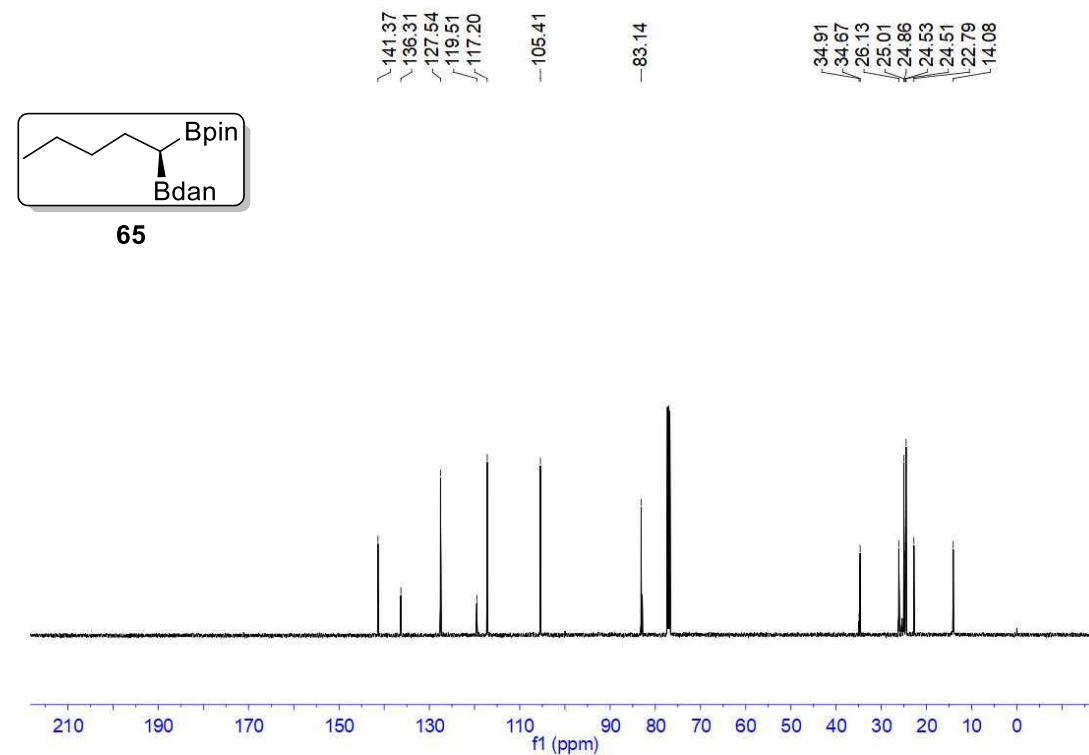

Supplementary Figure 206.  $^{13}\text{C}$  NMR spectrum of compound 65

$^{11}\text{B}$  NMR (160 MHz, room temperature,  $\text{CDCl}_3$ )

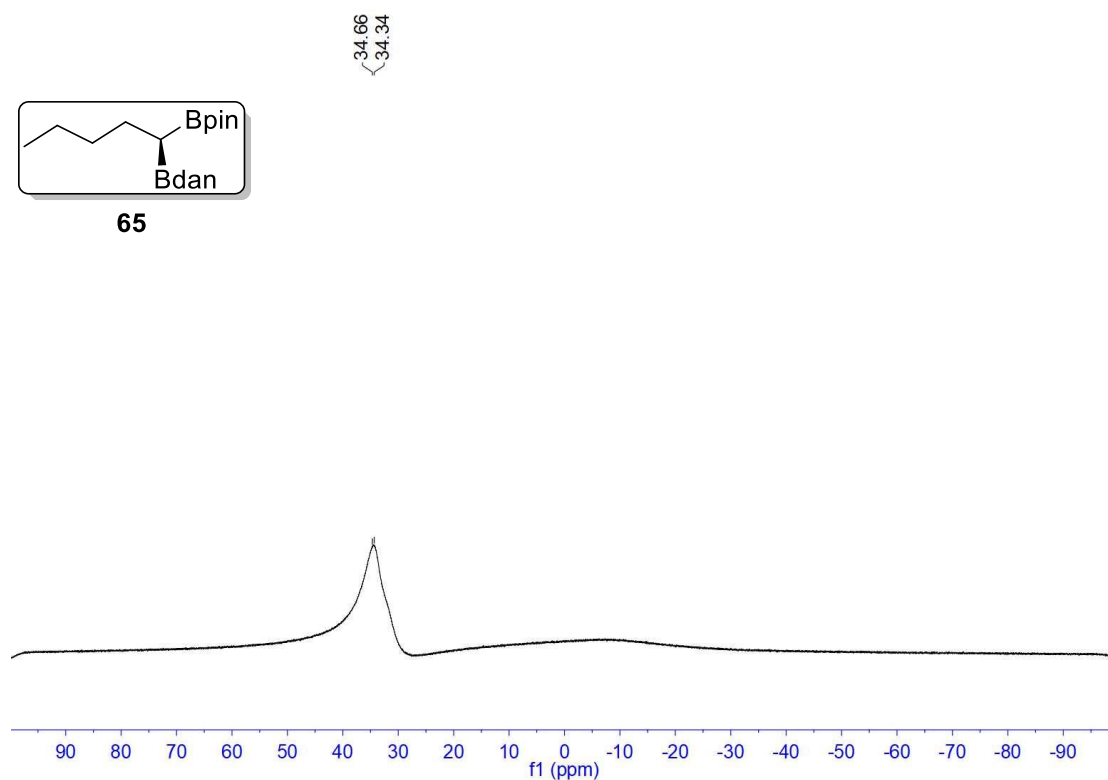

Supplementary Figure 207.  $^{11}\text{B}$  NMR spectrum of compound 65

(R)-2-(1-(4,4,5,5-tetramethyl-1,3,2-dioxaborolan-2-yl)hexyl)-2,3-dihydro-1H-naphtho[1,8-de][1,3,2]diazaborinine (66)

$^1\text{H}$  NMR (500 MHz, room temperature,  $\text{CDCl}_3$ )

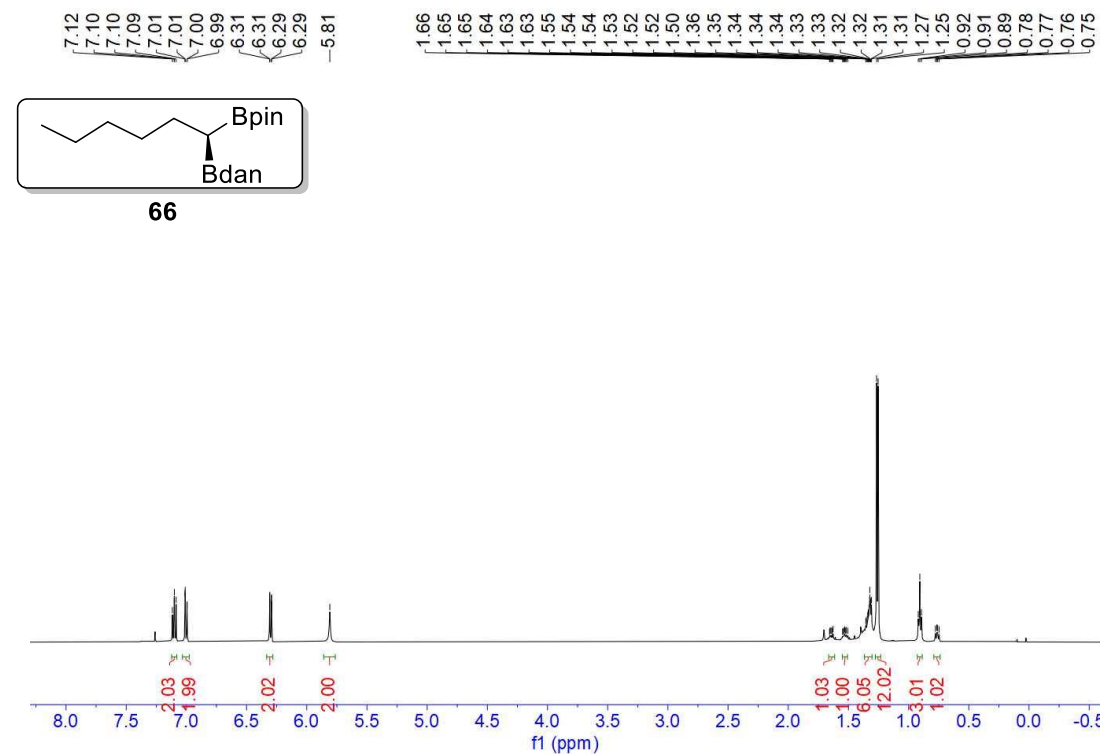

Supplementary Figure 208.  $^1\text{H}$  NMR spectrum of compound 66

$^{13}\text{C}$  NMR (126 MHz, room temperature,  $\text{CDCl}_3$ )

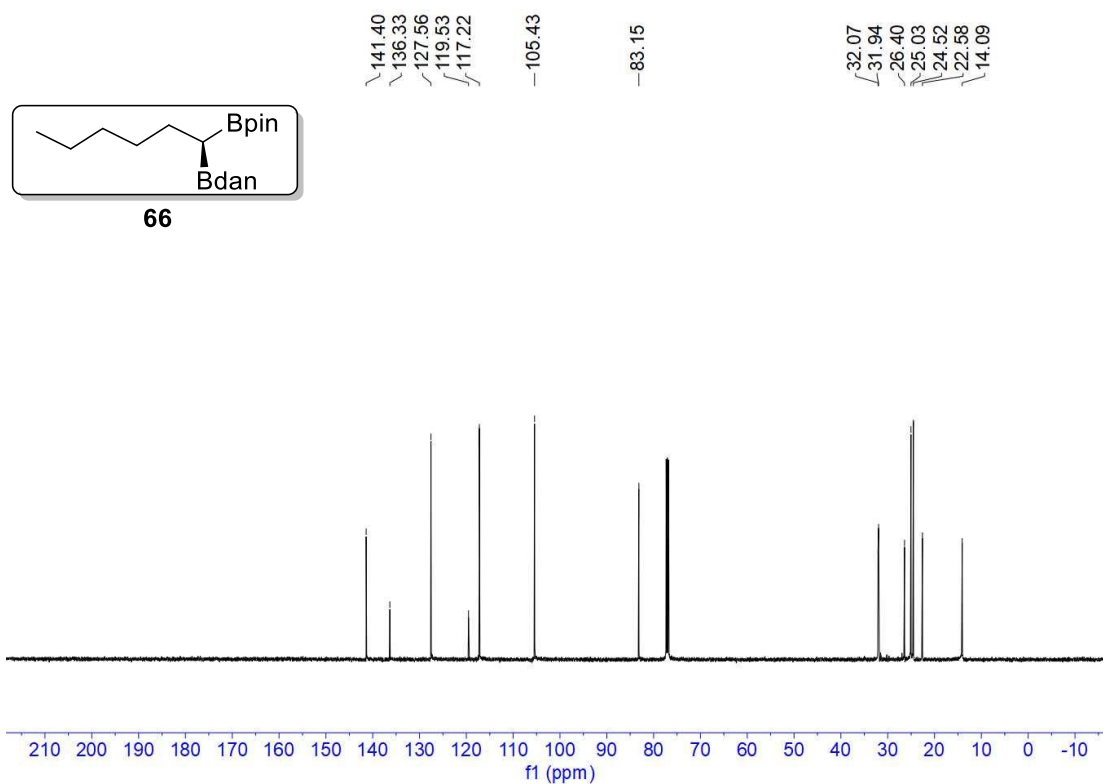

Supplementary Figure 209.  $^{13}\text{C}$  NMR spectrum of compound 66

$^{11}\text{B}$  NMR (160 MHz, room temperature,  $\text{CDCl}_3$ )

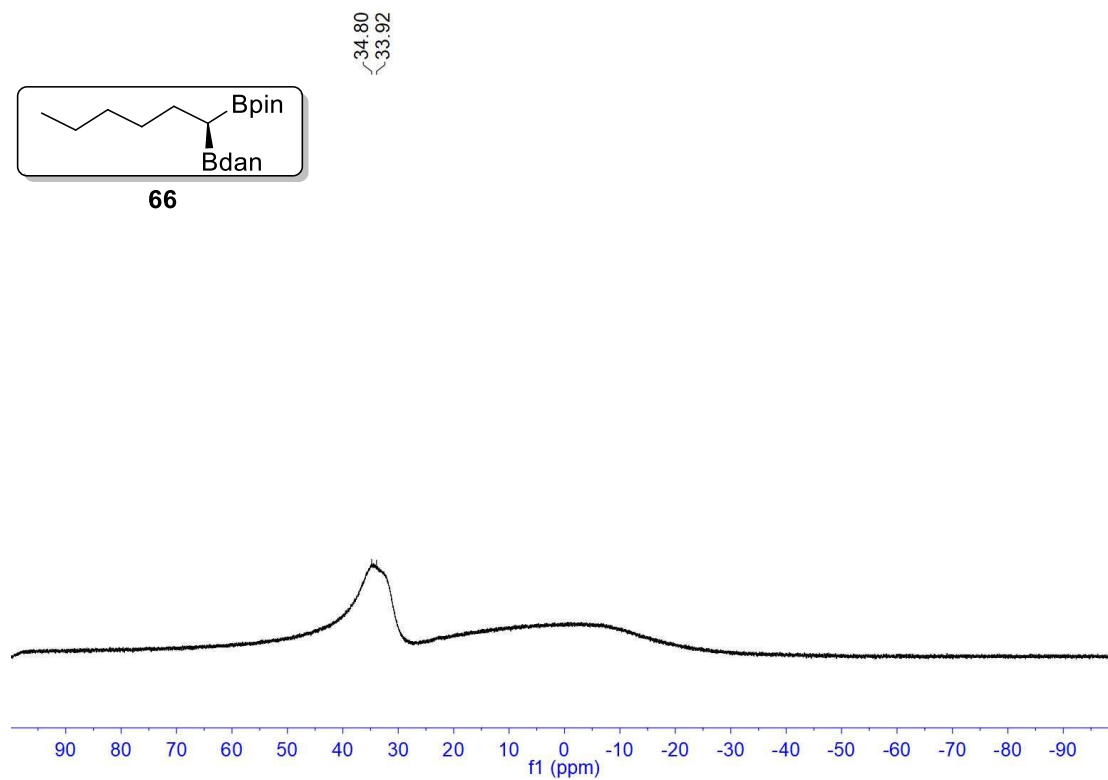

Supplementary Figure 210.  $^{11}\text{B}$  NMR spectrum of compound 66

(R)-2-(1-(4,4,5,5-tetramethyl-1,3,2-dioxaborolan-2-yl)heptyl)-2,3-dihydro-1H-naphtho[1,8-de][1,3,2]diazaborinine (67)

$^1\text{H}$  NMR (500 MHz, room temperature,  $\text{CDCl}_3$ )

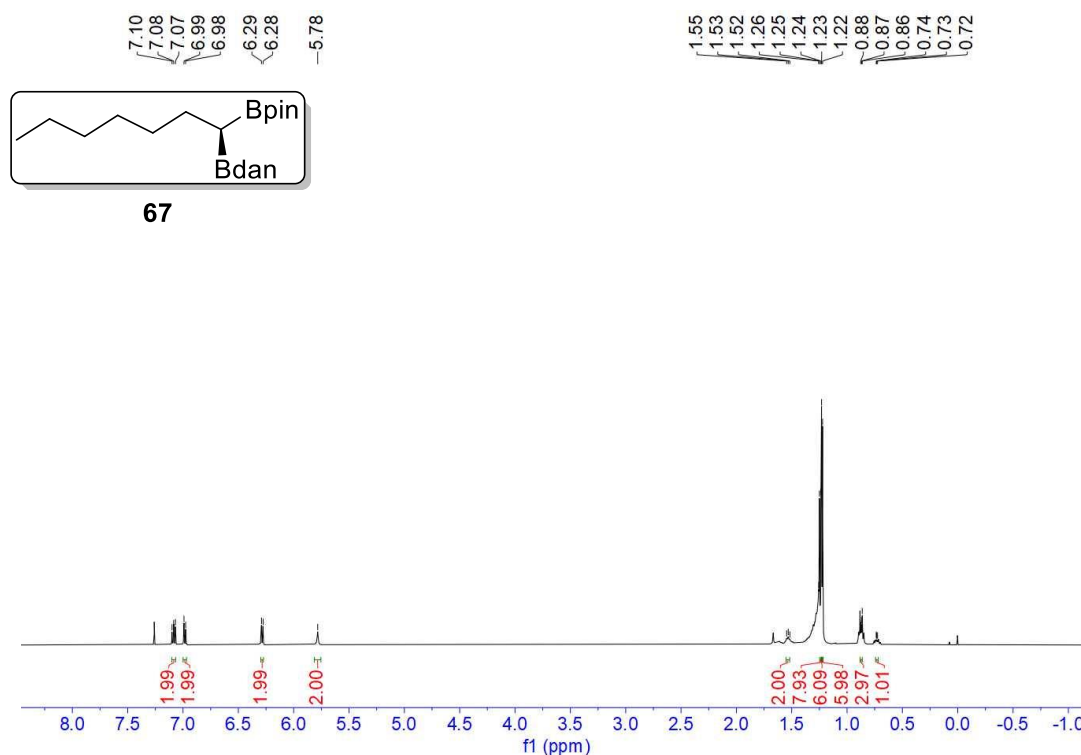

Supplementary Figure 211.  $^1\text{H}$  NMR spectrum of compound 67

$^{13}\text{C}$  NMR (126 MHz, room temperature,  $\text{CDCl}_3$ )

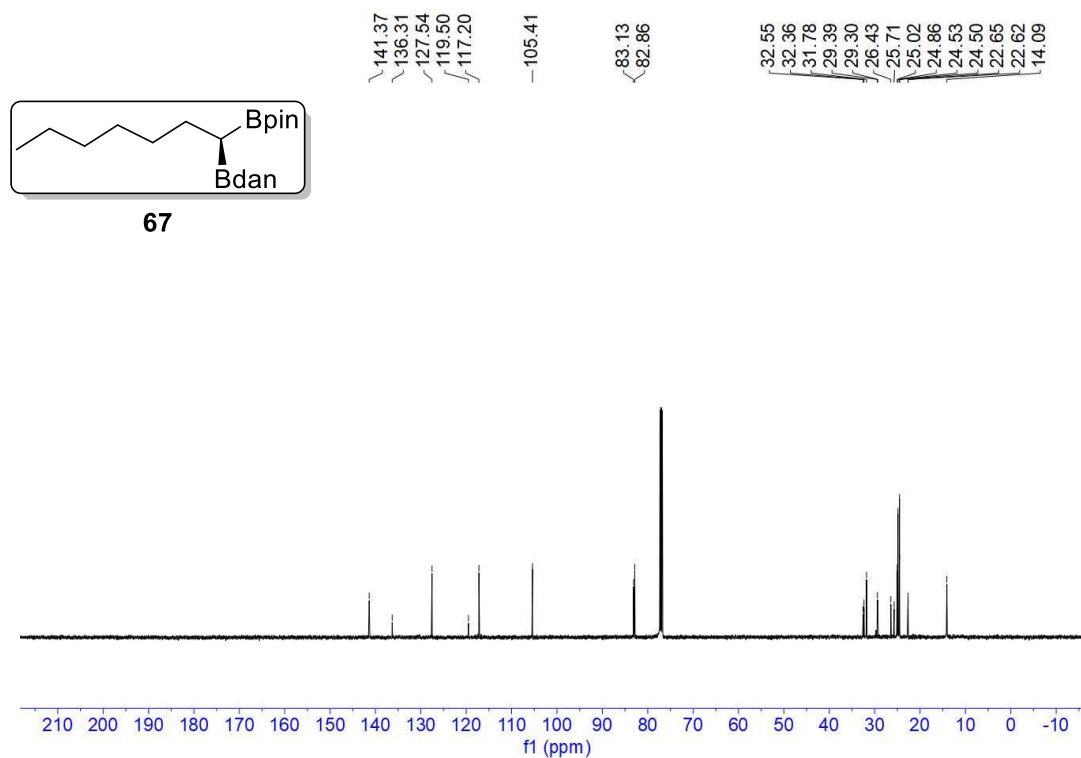

Supplementary Figure 212.  $^{13}\text{C}$  NMR spectrum of compound 67

$^{11}\text{B}$  NMR (160 MHz, room temperature,  $\text{CDCl}_3$ )

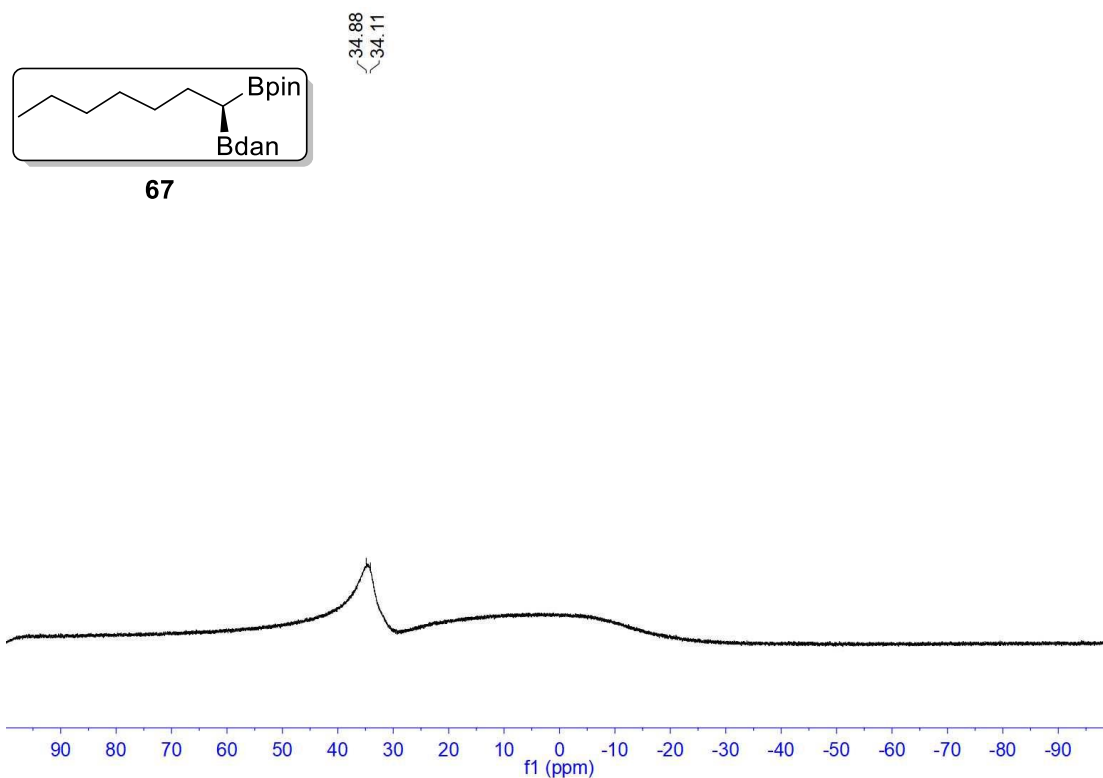

Supplementary Figure 213.  $^{11}\text{B}$  NMR spectrum of compound 67

(R)-2-(1-(4,4,5,5-tetramethyl-1,3,2-dioxaborolan-2-yl)octyl)-2,3-dihydro-1H-naphtho[1,8-de][1,3,2]diazaborinine (68)

$^1\text{H}$  NMR (500 MHz, room temperature,  $\text{CDCl}_3$ )

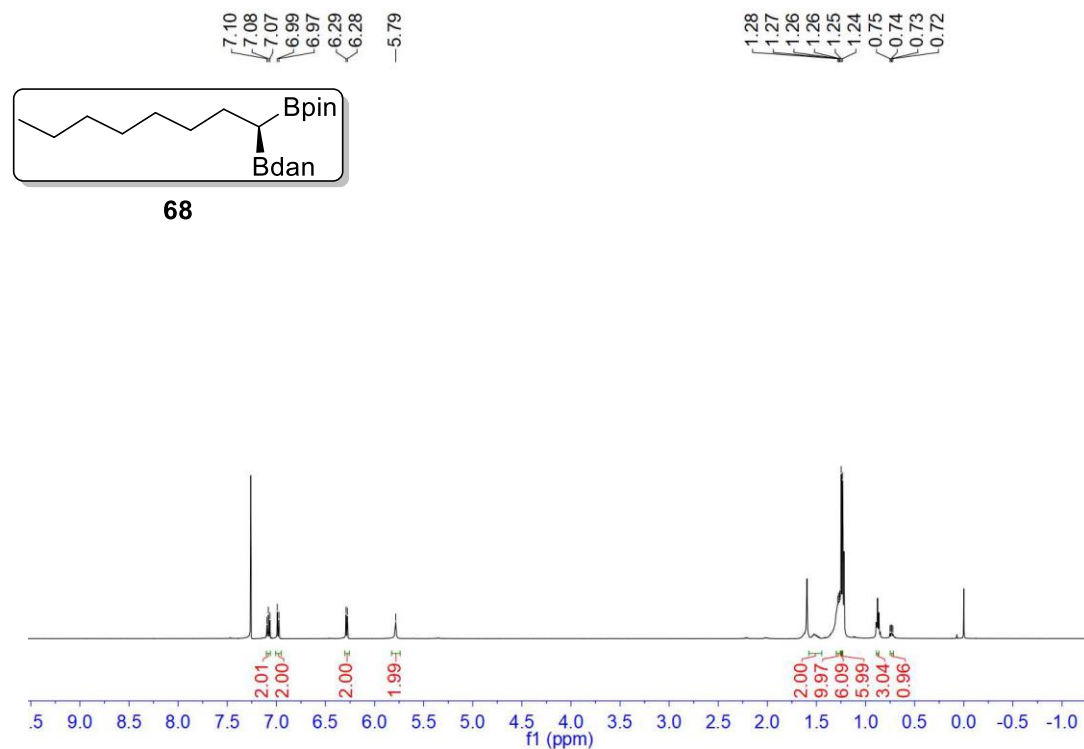

Supplementary Figure 214.  $^1\text{H}$  NMR spectrum of compound 68

$^{13}\text{C}$  NMR (126 MHz, room temperature,  $\text{CDCl}_3$ )

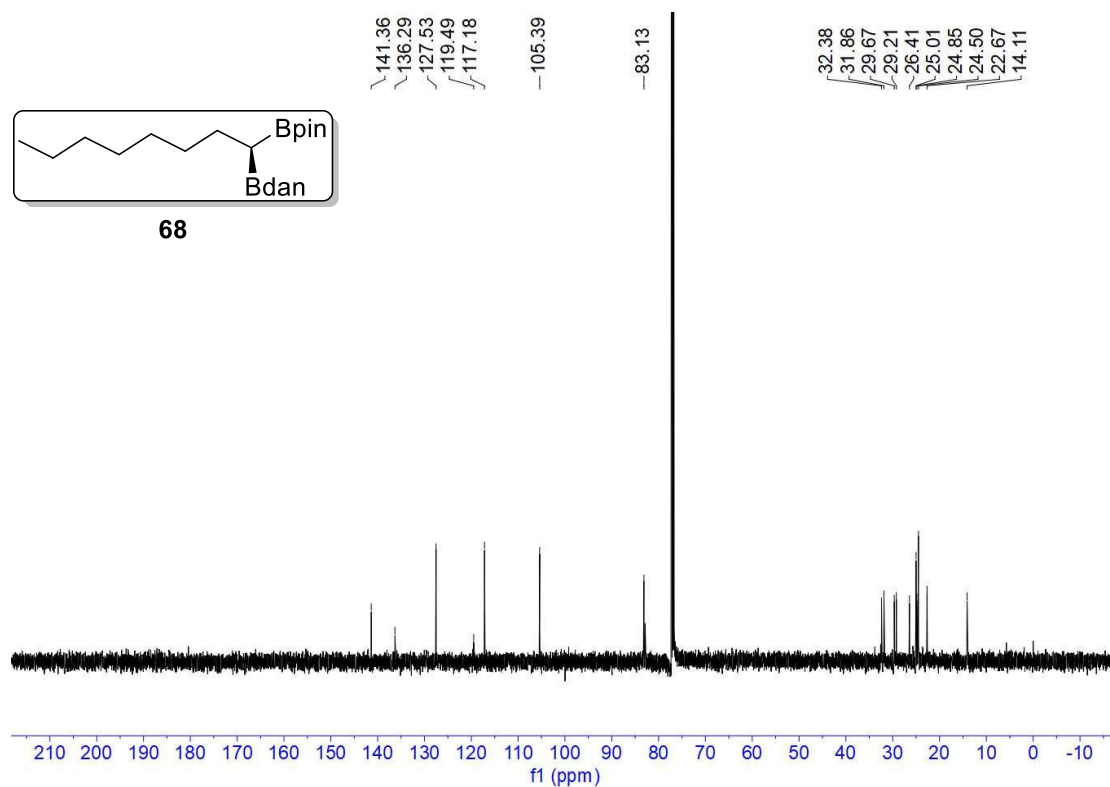

Supplementary Figure 215.  $^{13}\text{C}$  NMR spectrum of compound 68

$^{11}\text{B}$  NMR (160 MHz, room temperature,  $\text{CDCl}_3$ )

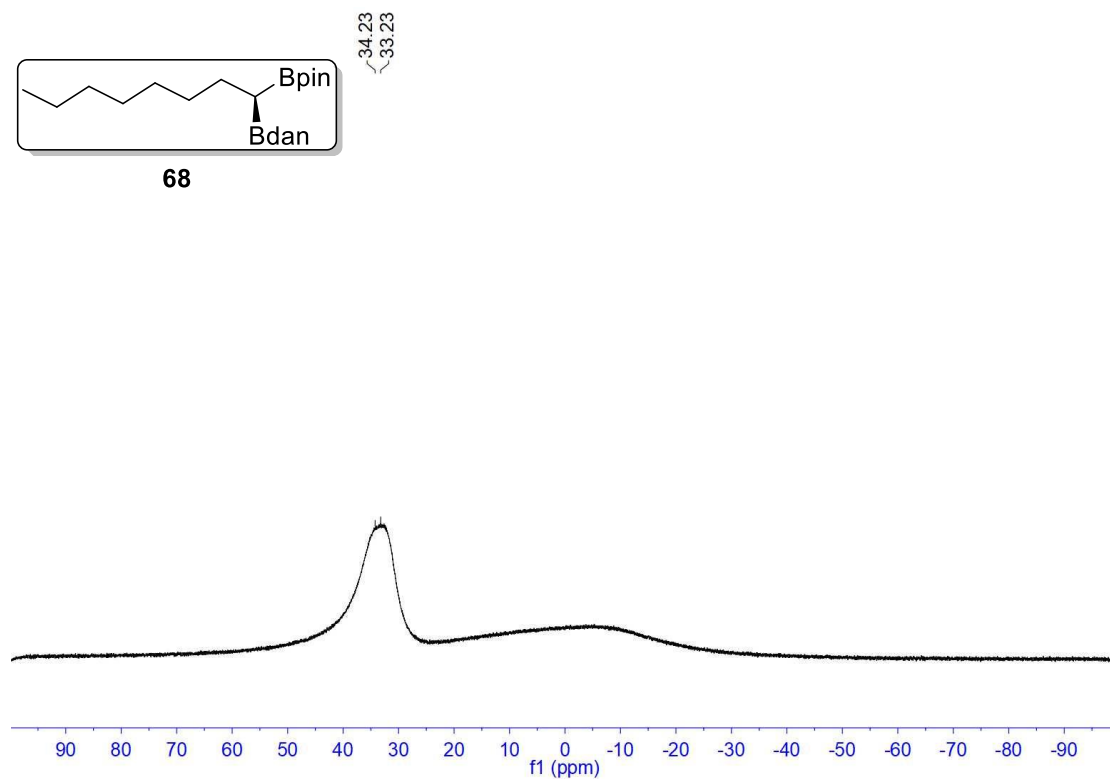

Supplementary Figure 216.  $^{11}\text{B}$  NMR spectrum of compound 68



**(R)-2-(1-(4,4,5,5-tetramethyl-1,3,2-dioxaborolan-2-yl)nonyl)-2,3-dihydro-1H-naphtho[1,8-de][1,3,2]diazaborinine (69)**

**<sup>1</sup>H NMR (500 MHz, room temperature, CDCl<sub>3</sub>)**

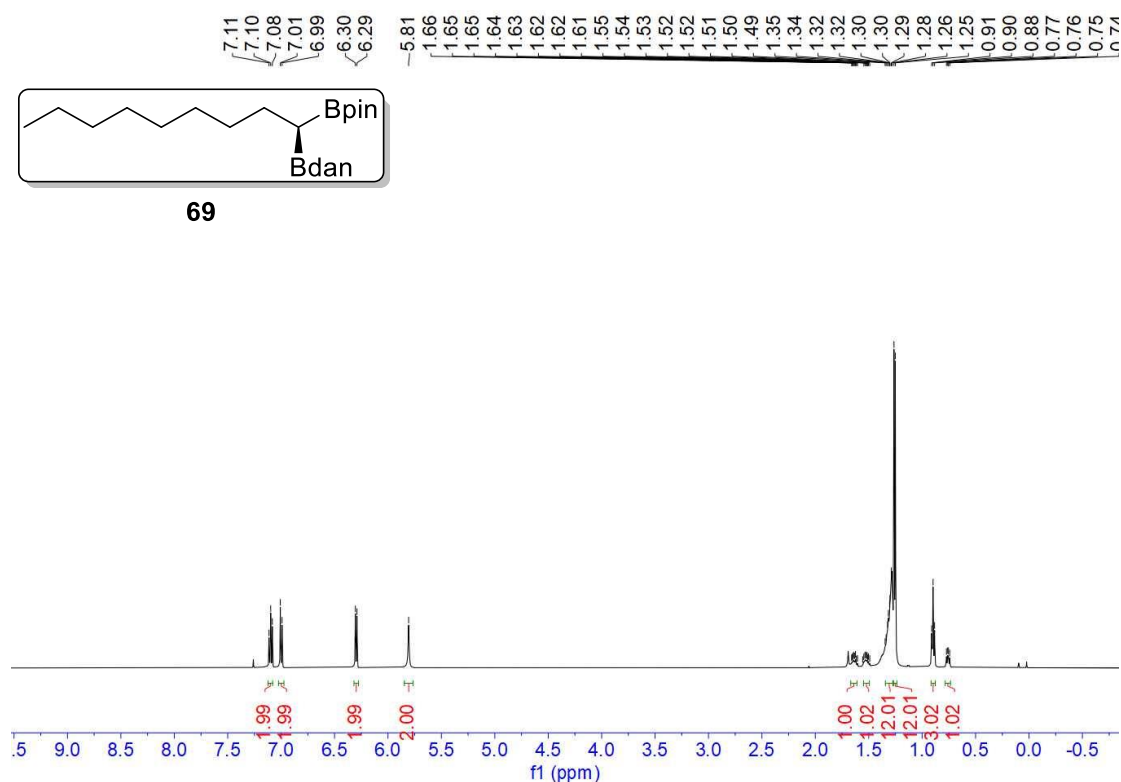

Supplementary Figure 217. <sup>1</sup>H NMR spectrum of compound 69

**<sup>13</sup>C NMR (126 MHz, room temperature, CDCl<sub>3</sub>)**

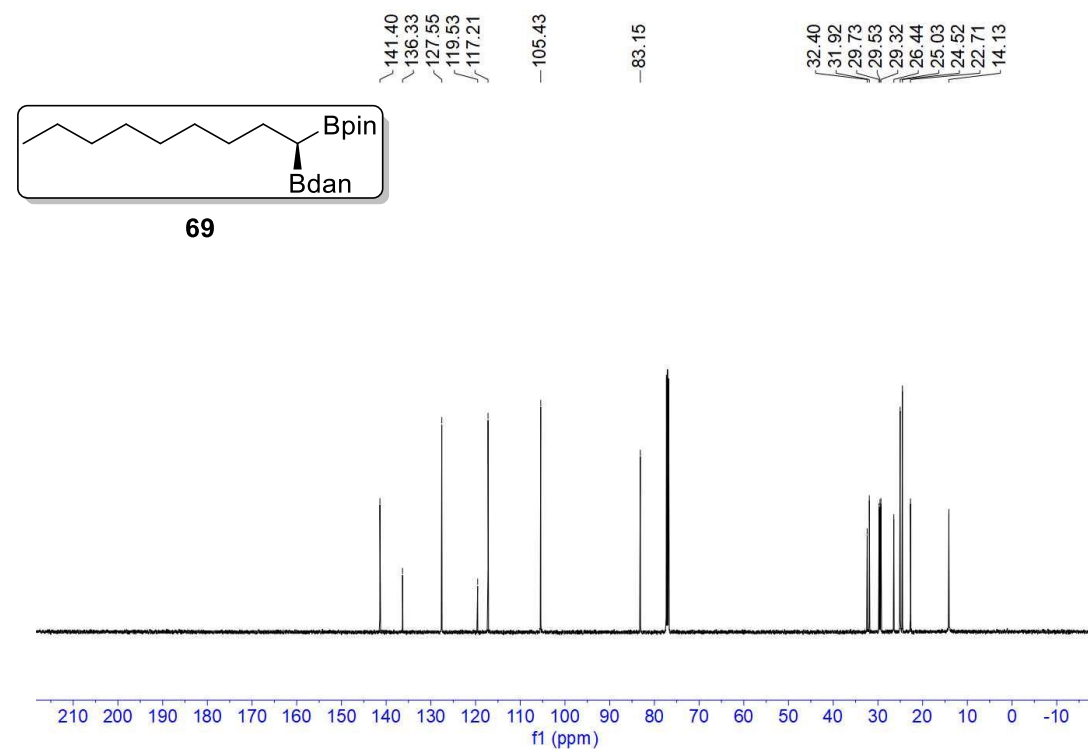

Supplementary Figure 218. <sup>13</sup>C NMR spectrum of compound 69

<sup>11</sup>B NMR (160 MHz, room temperature, CDCl<sub>3</sub>)

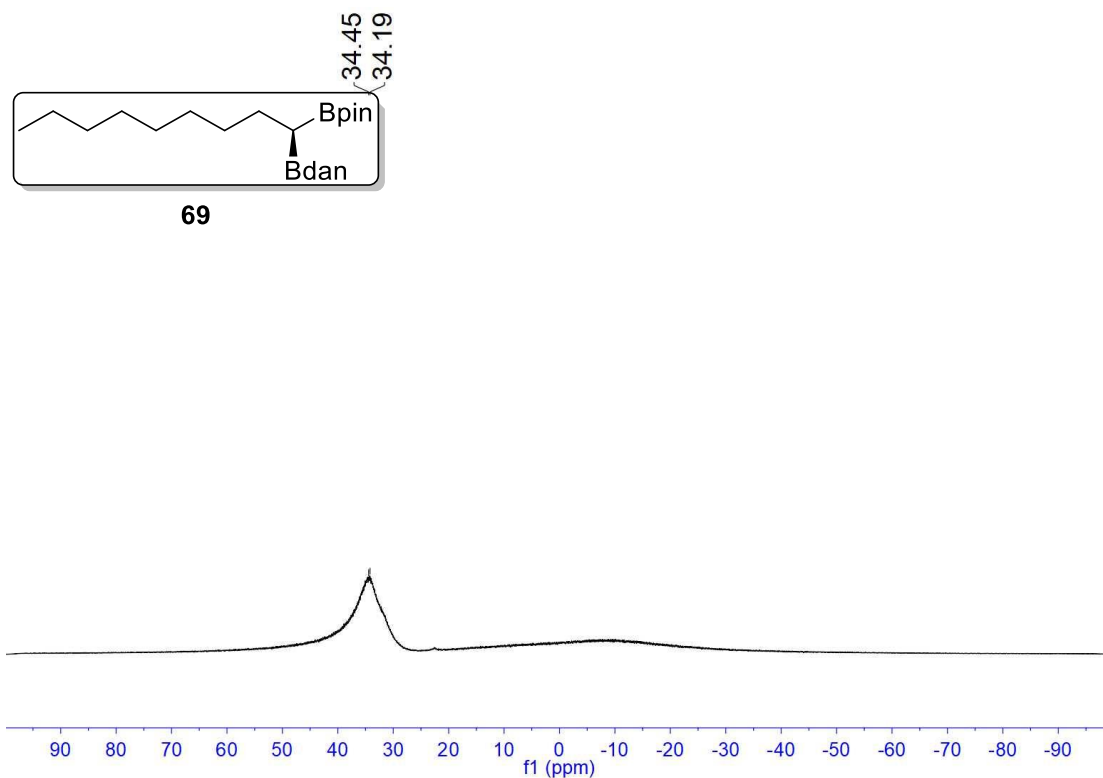

69

Supplementary Figure 219. <sup>11</sup>B NMR spectrum of compound 69

(R)-2-(5-methyl-1-(4,4,5,5-tetramethyl-1,3,2-dioxaborolan-2-yl)hexyl)-2,3-dihydro-1H-naphtho[1,8-de][1,3,2]diazaborinine (70)

<sup>1</sup>H NMR (500 MHz, room temperature, CDCl<sub>3</sub>)

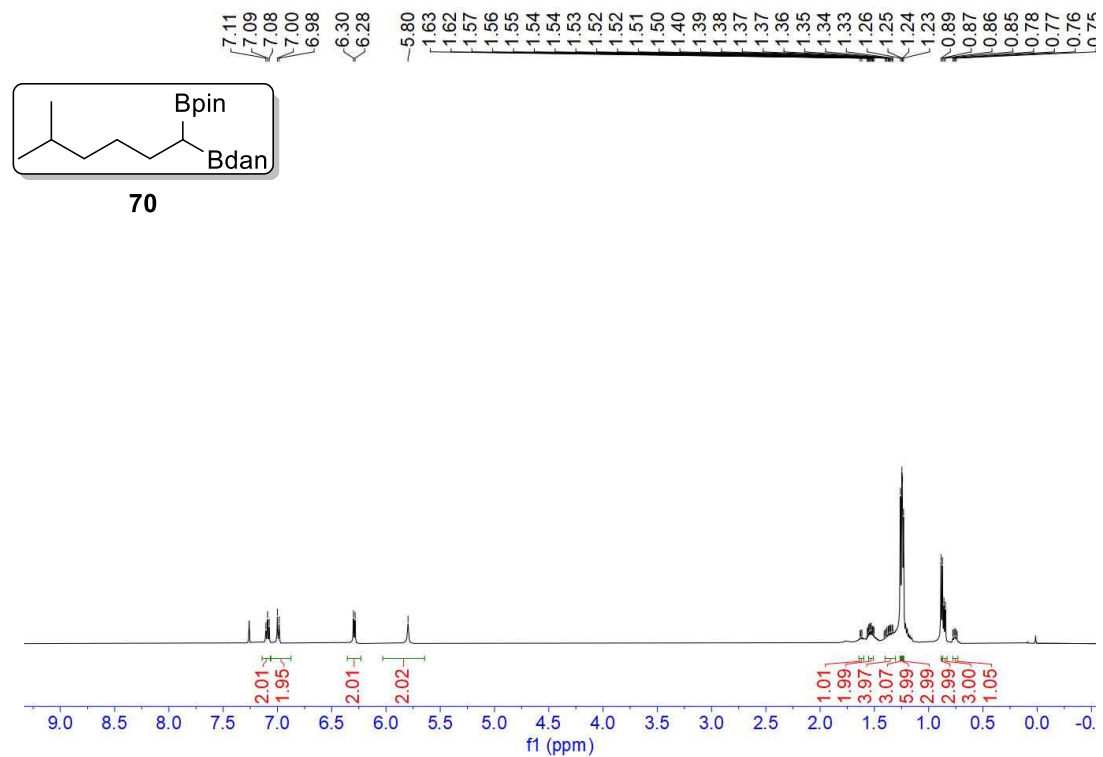

70

Supplementary Figure 220. <sup>1</sup>H NMR spectrum of compound 70

<sup>13</sup>C NMR (126 MHz, room temperature, CDCl<sub>3</sub>)

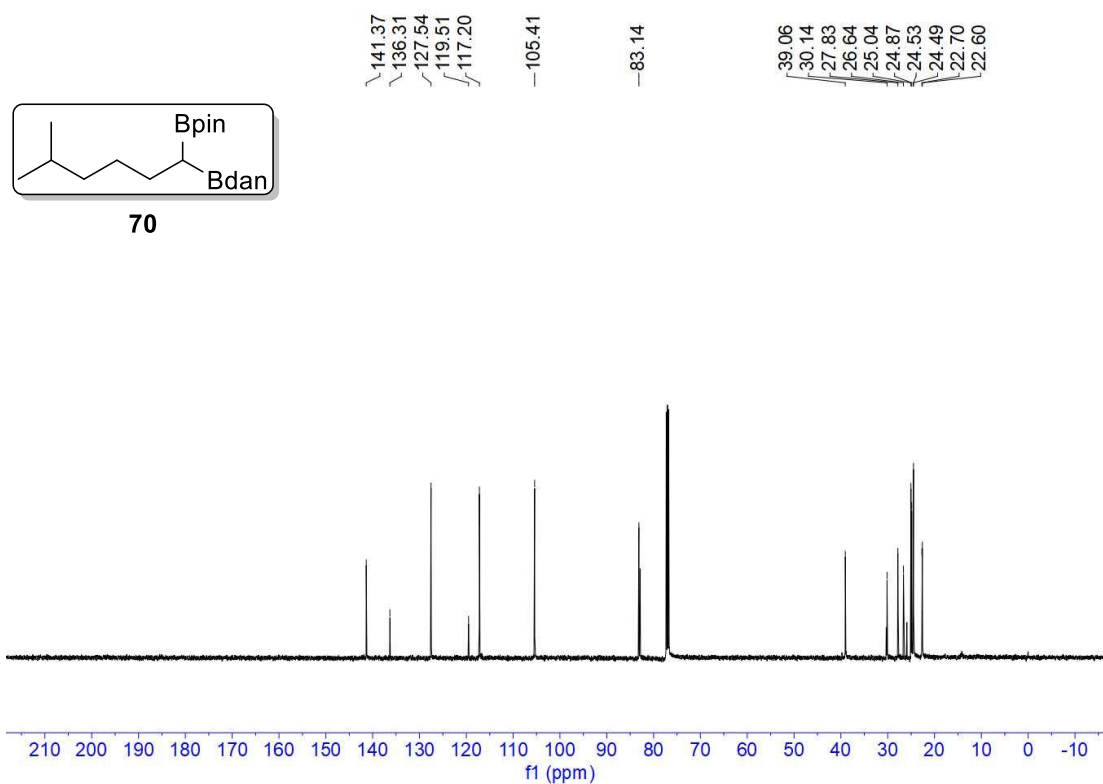

Supplementary Figure 221. <sup>13</sup>C NMR spectrum of compound 70

<sup>11</sup>B NMR (160 MHz, room temperature, CDCl<sub>3</sub>)

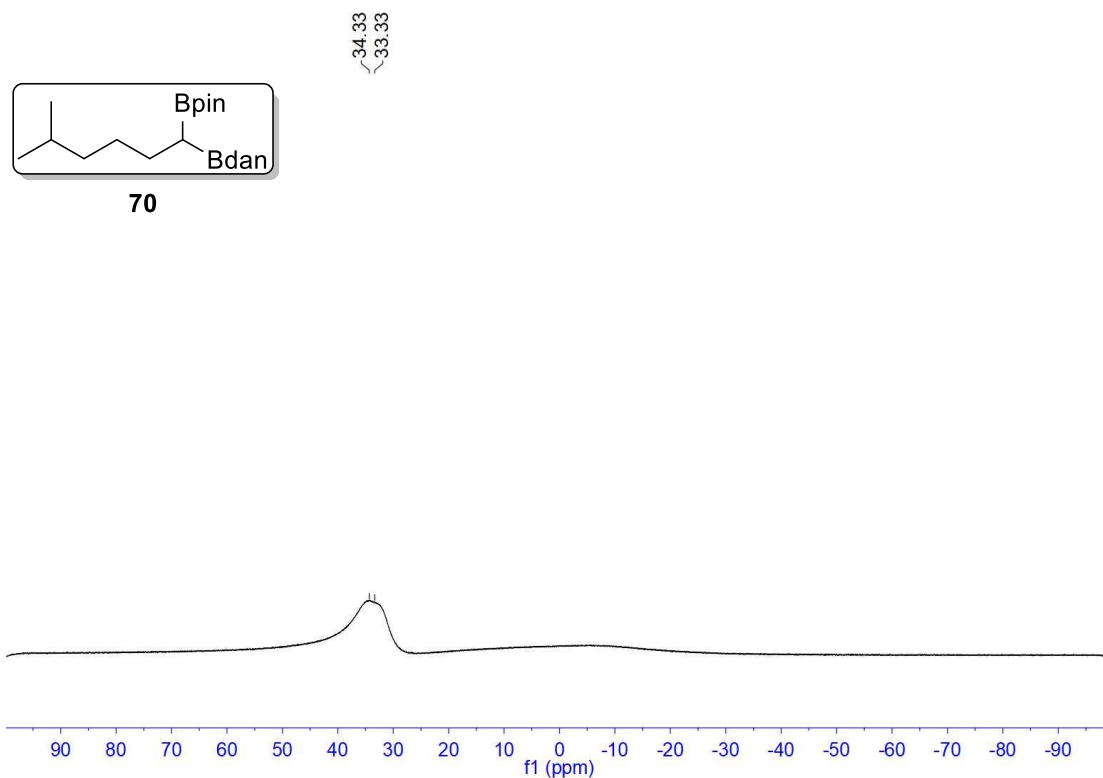

Supplementary Figure 222. <sup>11</sup>B NMR spectrum of compound 70

(R)-tert-butyl 4-(2-(1H-naphtho[1,8-de][1,3,2]diazaborinin-2(3H)-yl)-2-(4,4,5,5-tetramethyl-1,3,2-dioxaborolan-2-yl)ethyl)piperidine-1-carboxylate (71)

$^1\text{H}$  NMR (500 MHz, room temperature,  $\text{CDCl}_3$ )

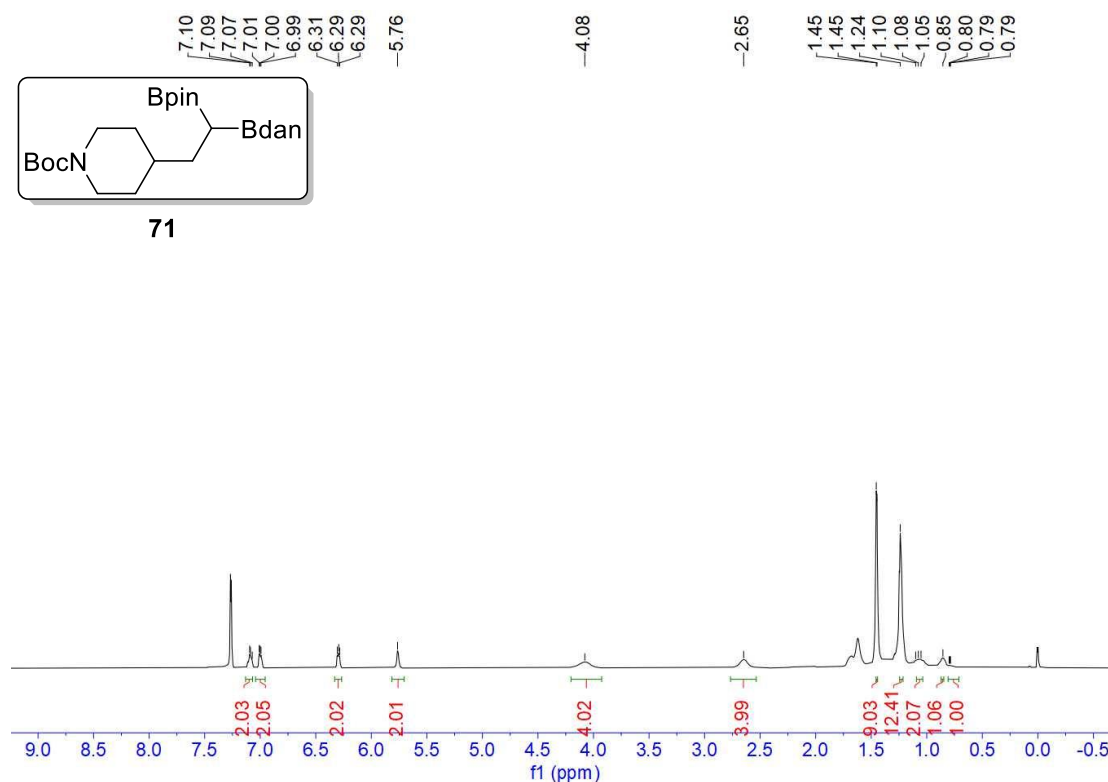

Supplementary Figure 223.  $^1\text{H}$  NMR spectrum of compound 71

$^{13}\text{C}$  NMR (126 MHz, room temperature,  $\text{CDCl}_3$ )

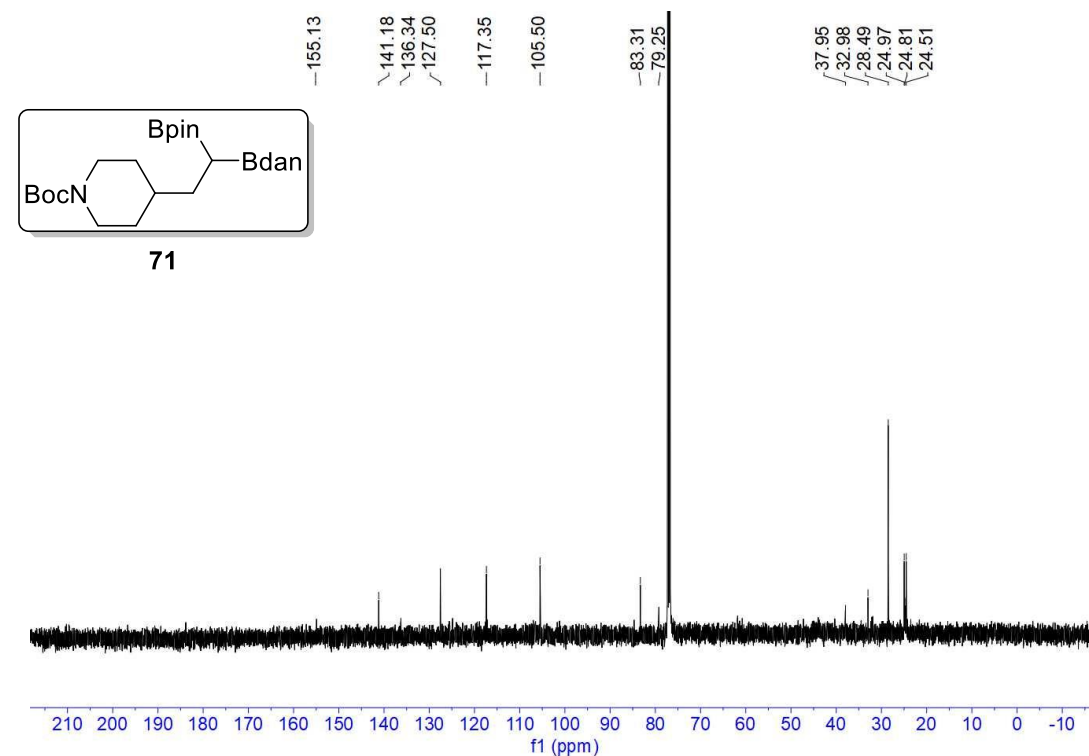

Supplementary Figure 224.  $^{13}\text{C}$  NMR spectrum of compound 71

**<sup>11</sup>B NMR (160 MHz, room temperature, CDCl<sub>3</sub>)**

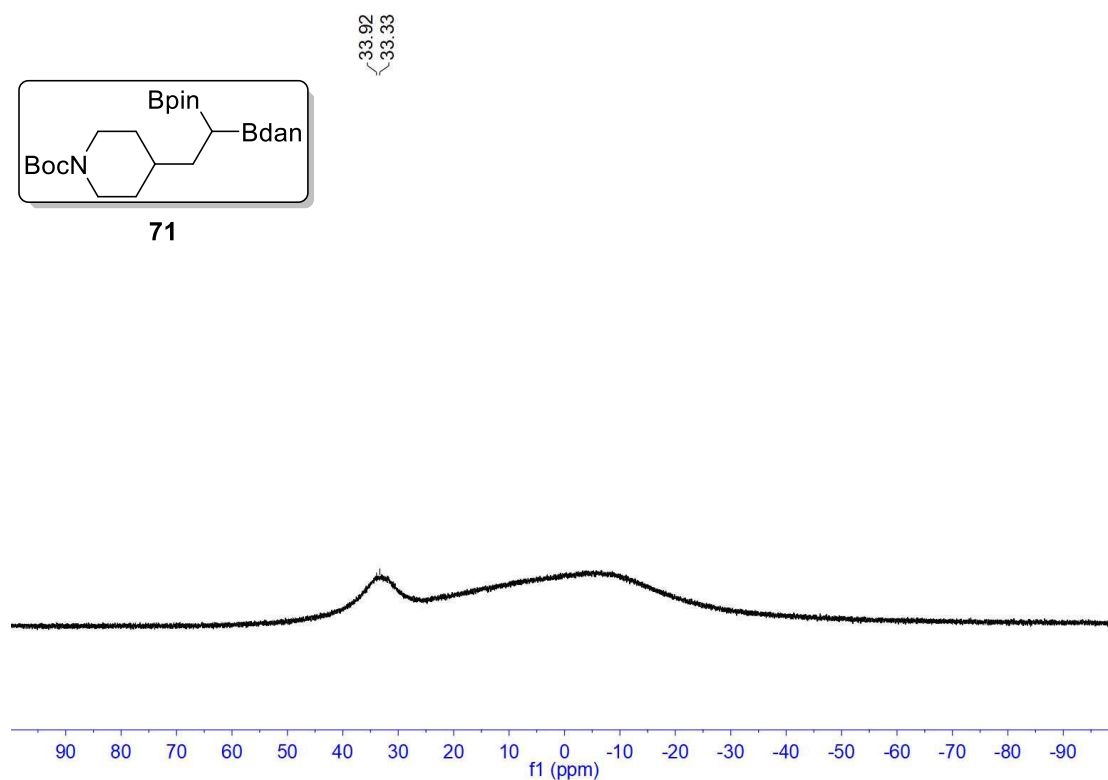

71

Supplementary Figure 225. <sup>11</sup>B NMR spectrum of compound 71

(R)-2-(4-((tert-butyldimethylsilyl)oxy)-1-(4,4,5,5-tetramethyl-1,3,2-dioxaborolan-2-yl)butyl)-2,3-dihydro-1H-naphtho[1,8-de][1,3,2]diazaborinine (72)

**<sup>1</sup>H NMR (500 MHz, room temperature, CDCl<sub>3</sub>)**

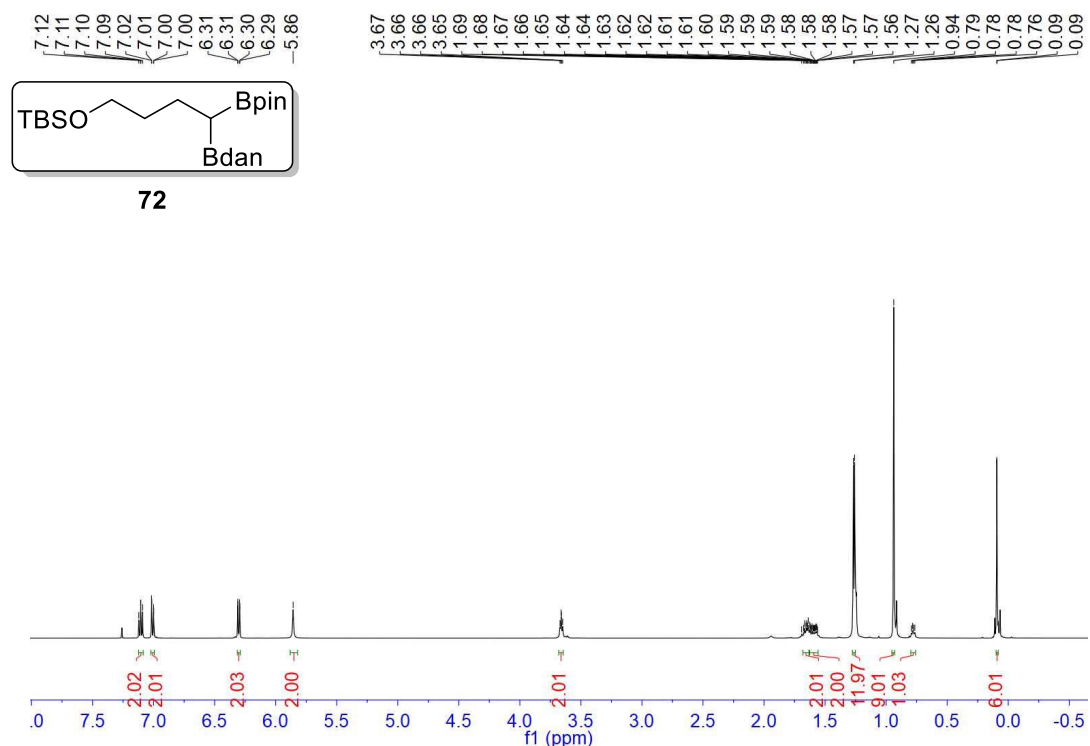

72

Supplementary Figure 226. <sup>1</sup>H NMR spectrum of compound 72

$^{13}\text{C}$  NMR (126 MHz, room temperature,  $\text{CDCl}_3$ )

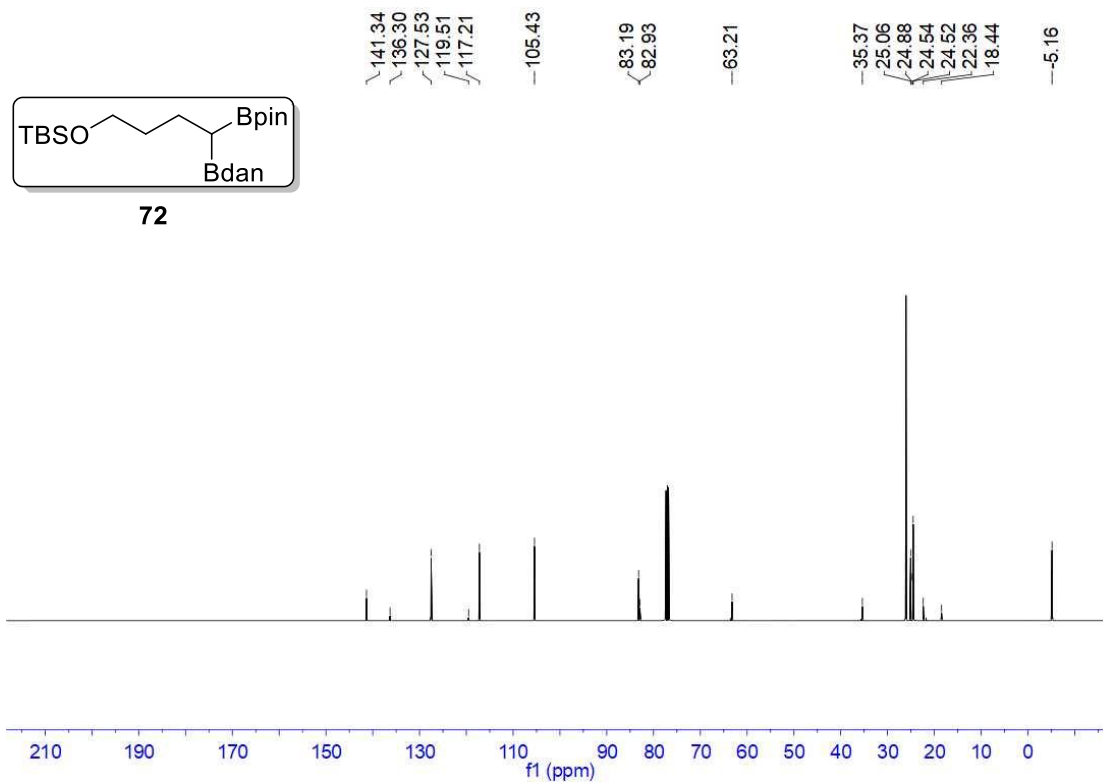

Supplementary Figure 227.  $^{13}\text{C}$  NMR spectrum of compound 72

$^{11}\text{B}$  NMR (160 MHz, room temperature,  $\text{CDCl}_3$ )

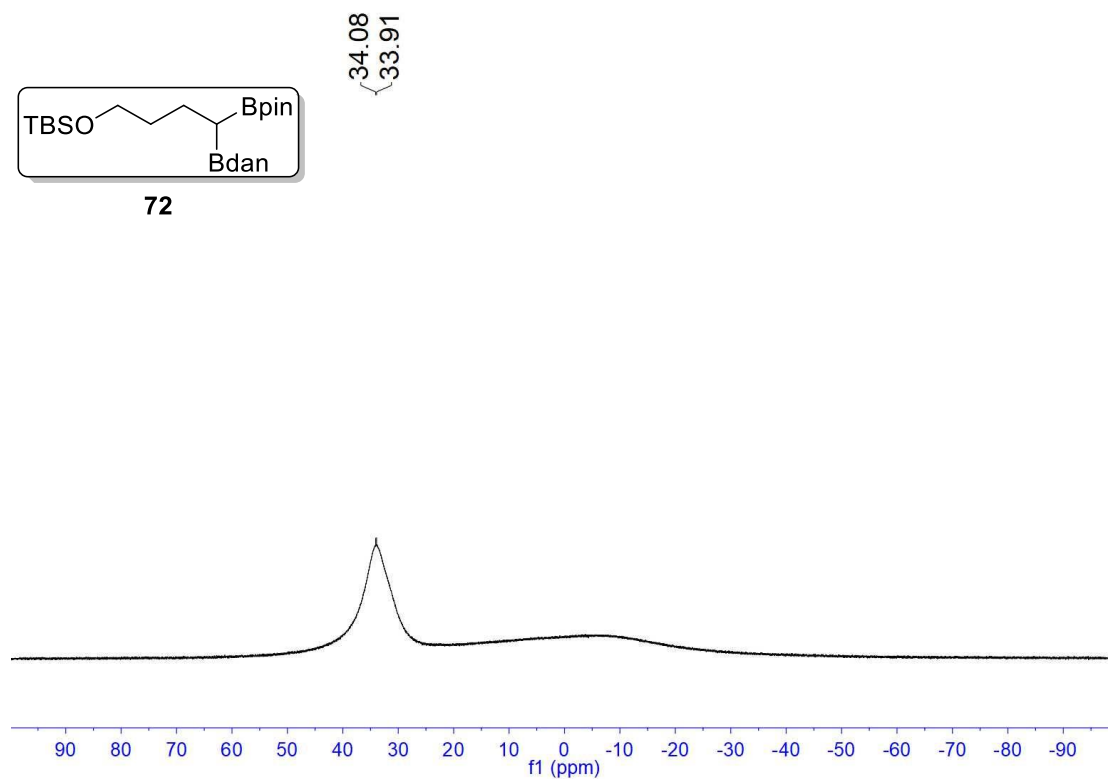

Supplementary Figure 228.  $^{11}\text{B}$  NMR spectrum of compound 72

**(R)-2-(6-((tert-butyldimethylsilyl)oxy)-1-(4,4,5,5-tetramethyl-1,3,2-dioxaborolan-2-yl)hexyl)-2,3-dihydro-1H-naphtho[1,8-de][1,3,2]diazaborinine (73)**

**$^1\text{H}$  NMR (500 MHz, room temperature,  $\text{CDCl}_3$ )**

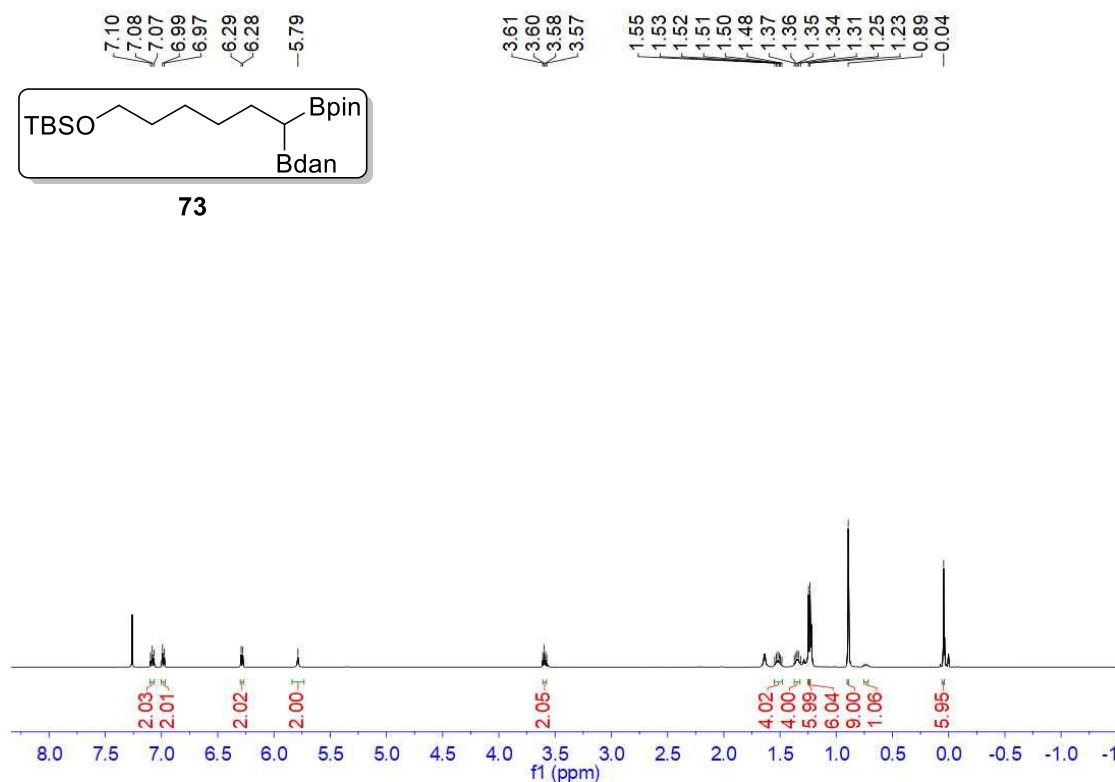

Supplementary Figure 229.  $^1\text{H}$  NMR spectrum of compound 73

**$^{13}\text{C}$  NMR (126 MHz, room temperature,  $\text{CDCl}_3$ )**

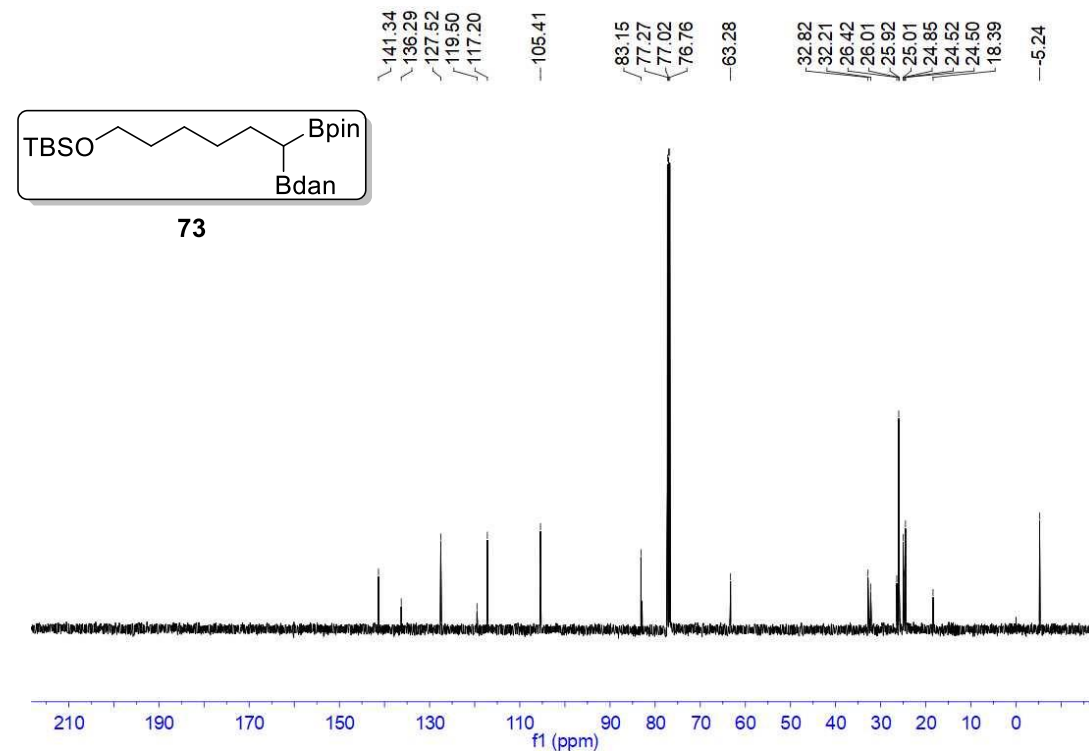

Supplementary Figure 230.  $^{13}\text{C}$  NMR spectrum of compound 73

**<sup>11</sup>B NMR (160 MHz, room temperature, CDCl<sub>3</sub>)**

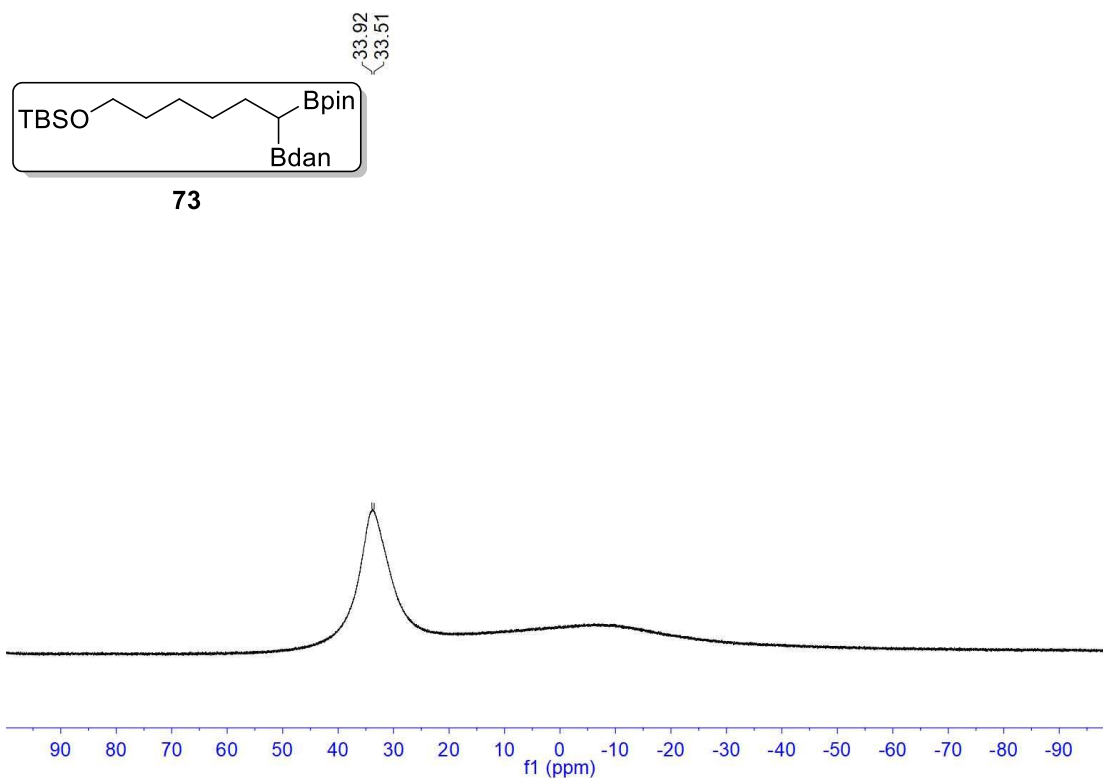

**73**

**Supplementary Figure 231. <sup>11</sup>B NMR spectrum of compound 73**

**(R)-2-(5-((tert-butyl-diphenylsilyloxy)-1-(4,4,5,5-tetramethyl-1,3,2-dioxaborolan-2-yl)pentyl)-2,3-dihydro-1H-naphtho[1,8-de][1,3,2]diazaborinine (74)**

**<sup>1</sup>H NMR (500 MHz, room temperature, CDCl<sub>3</sub>)**

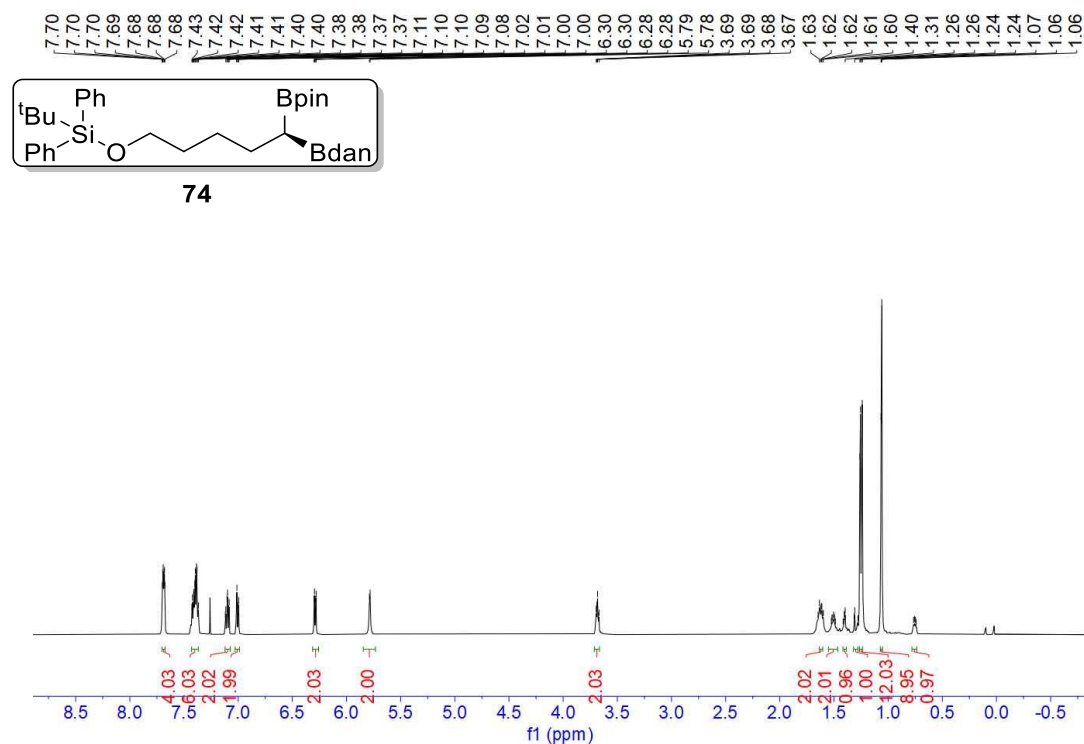

**74**

**Supplementary Figure 232. <sup>1</sup>H NMR spectrum of compound 74**



$^{13}\text{C}$  NMR (126 MHz, room temperature,  $\text{CDCl}_3$ )

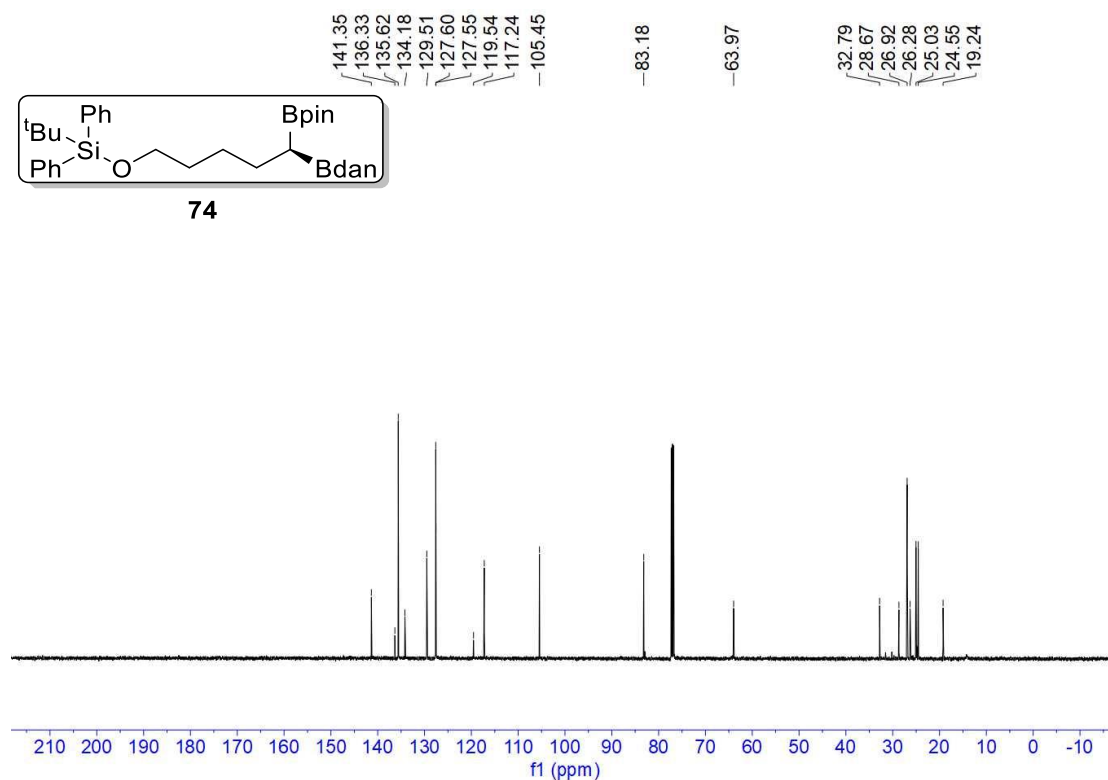

Supplementary Figure 233.  $^{13}\text{C}$  NMR spectrum of compound 74

$^{11}\text{B}$  NMR (160 MHz, room temperature,  $\text{CDCl}_3$ )

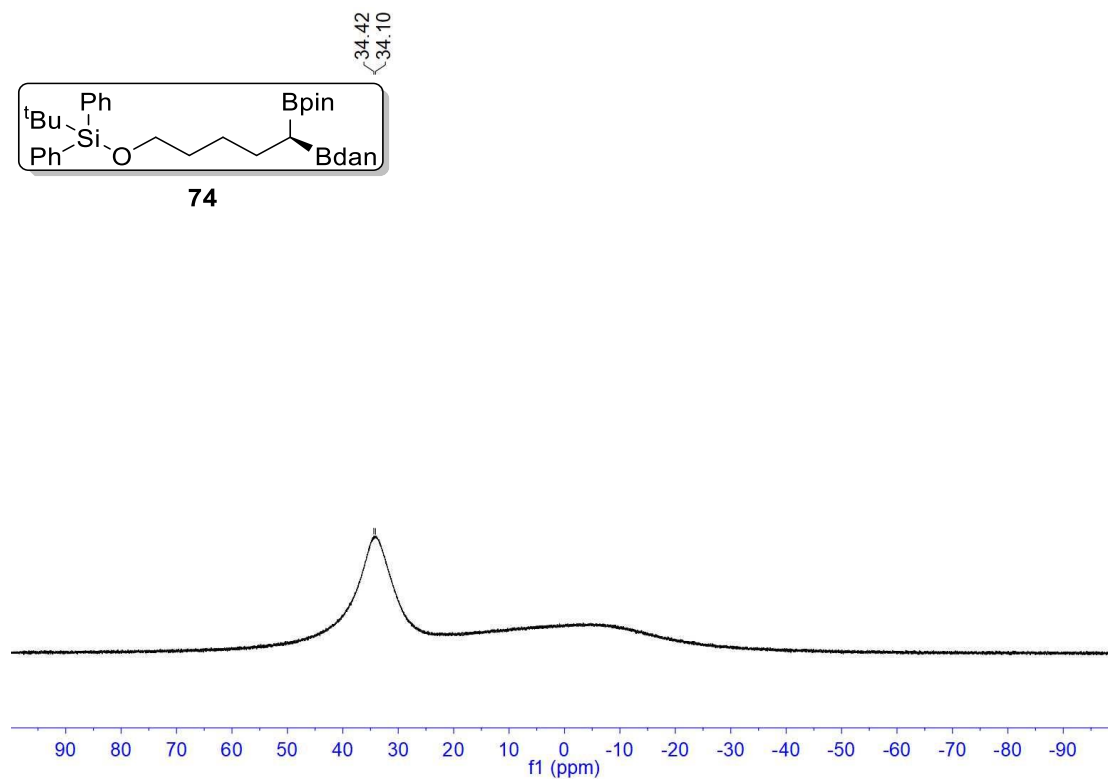

Supplementary Figure 234.  $^{11}\text{B}$  NMR spectrum of compound 74

**(R)-2-(1-(4,4,5,5-tetramethyl-1,3,2-dioxaborolan-2-yl)-5-((triisopropylsilyloxy)pentyl)-2,3-dihydro-1H-naphtho[1,8-de][1,3,2]diazaborinine (75)**

**<sup>1</sup>H NMR (500 MHz, room temperature, CDCl<sub>3</sub>)**

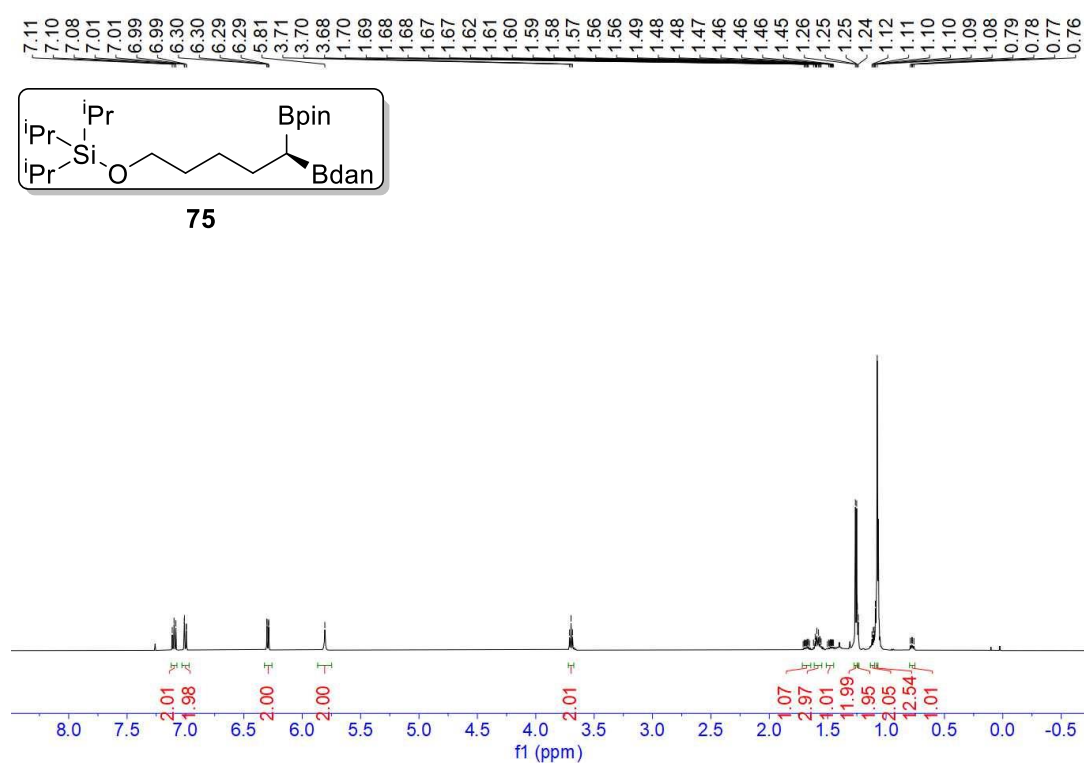

Supplementary Figure 235. <sup>1</sup>H NMR spectrum of compound 75

**<sup>13</sup>C NMR (126 MHz, room temperature, CDCl<sub>3</sub>)**

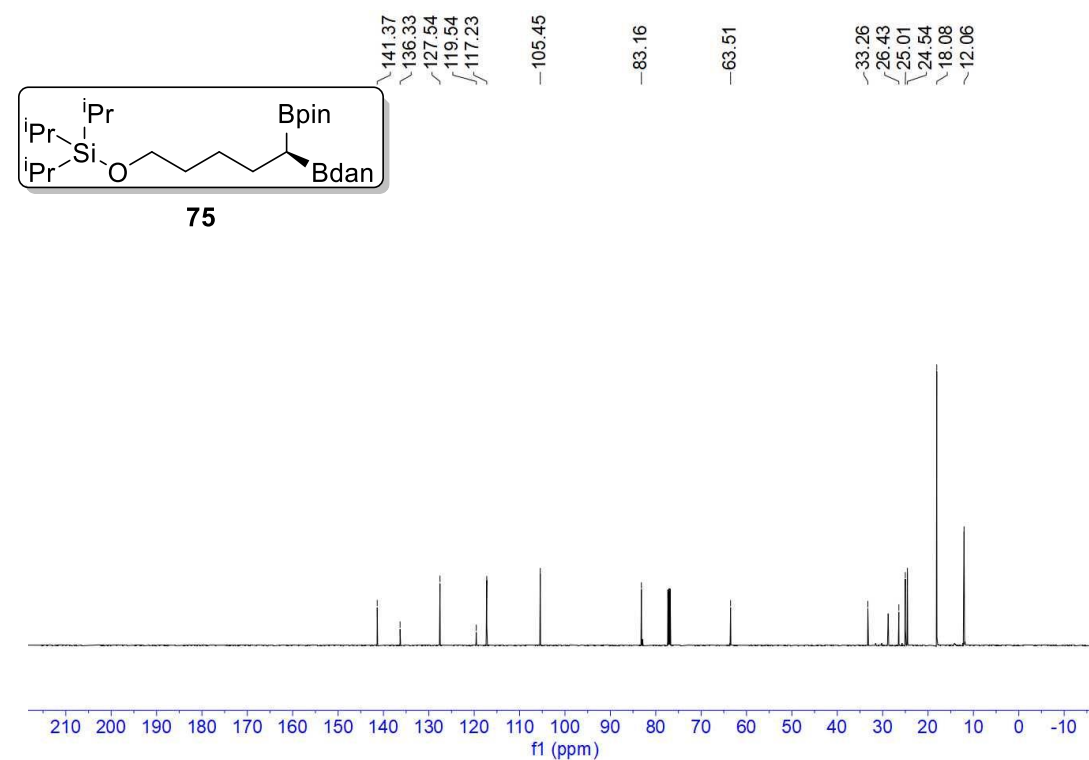

Supplementary Figure 236. <sup>13</sup>C NMR spectrum of compound 75

$^{11}\text{B}$  NMR (160 MHz, room temperature,  $\text{CDCl}_3$ )

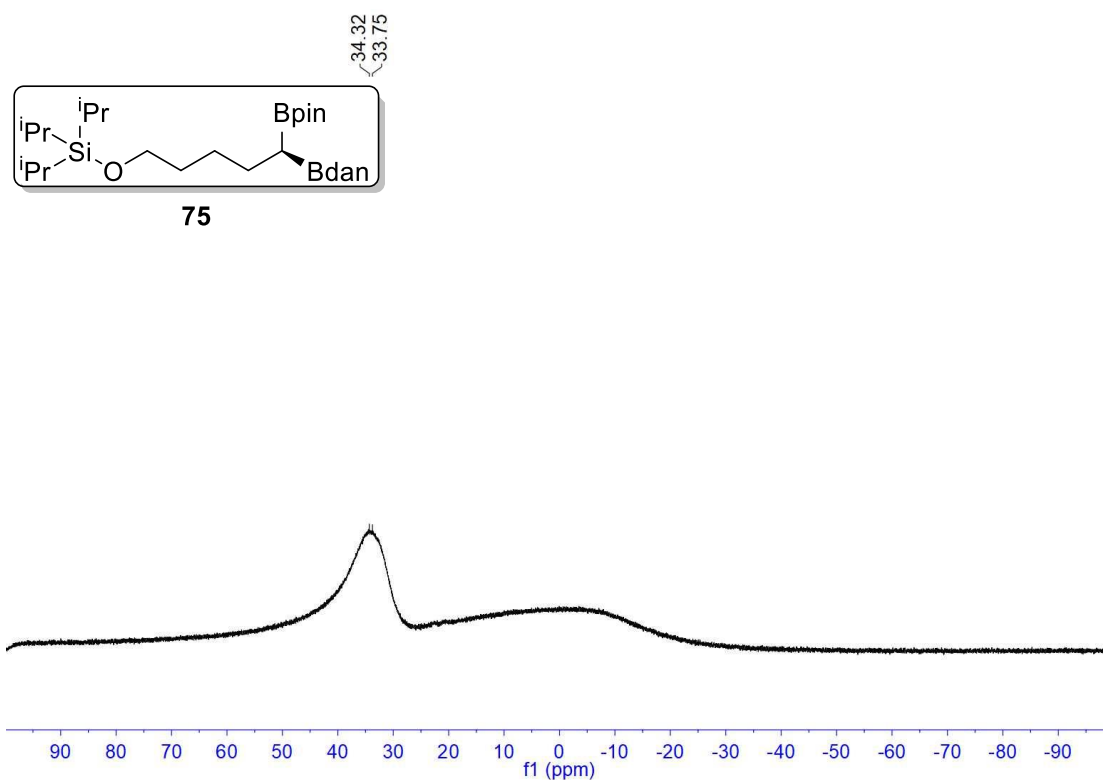

75

Supplementary Figure 237.  $^{13}\text{C}$  NMR spectrum of compound 75

(R)-5-(1H-naphtho[1,8-de][1,3,2]diazaborinin-2(3H)-yl)-5-(4,4,5,5-tetramethyl-1,3,2-dioxaborolan-2-yl)pentyl propionate (76)

$^1\text{H}$  NMR (500 MHz, room temperature,  $\text{CDCl}_3$ )

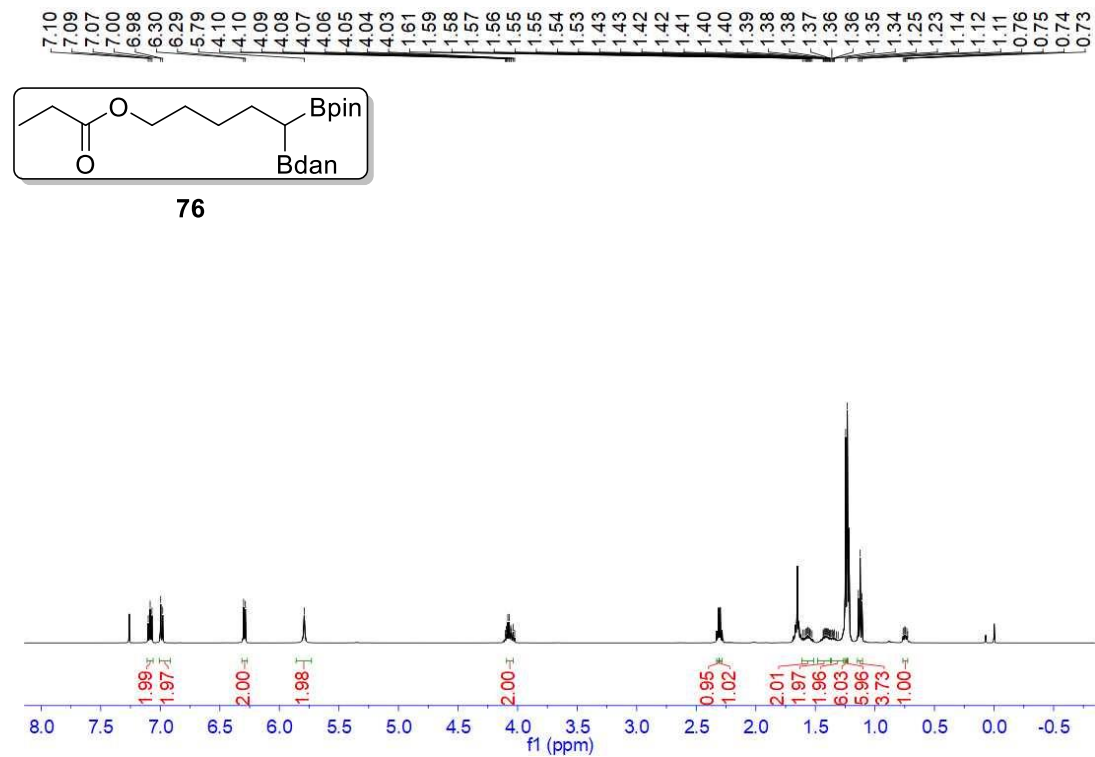

76

Supplementary Figure 238.  $^1\text{H}$  NMR spectrum of compound 76

**$^{13}\text{C}$  NMR (126 MHz, room temperature,  $\text{CDCl}_3$ )**

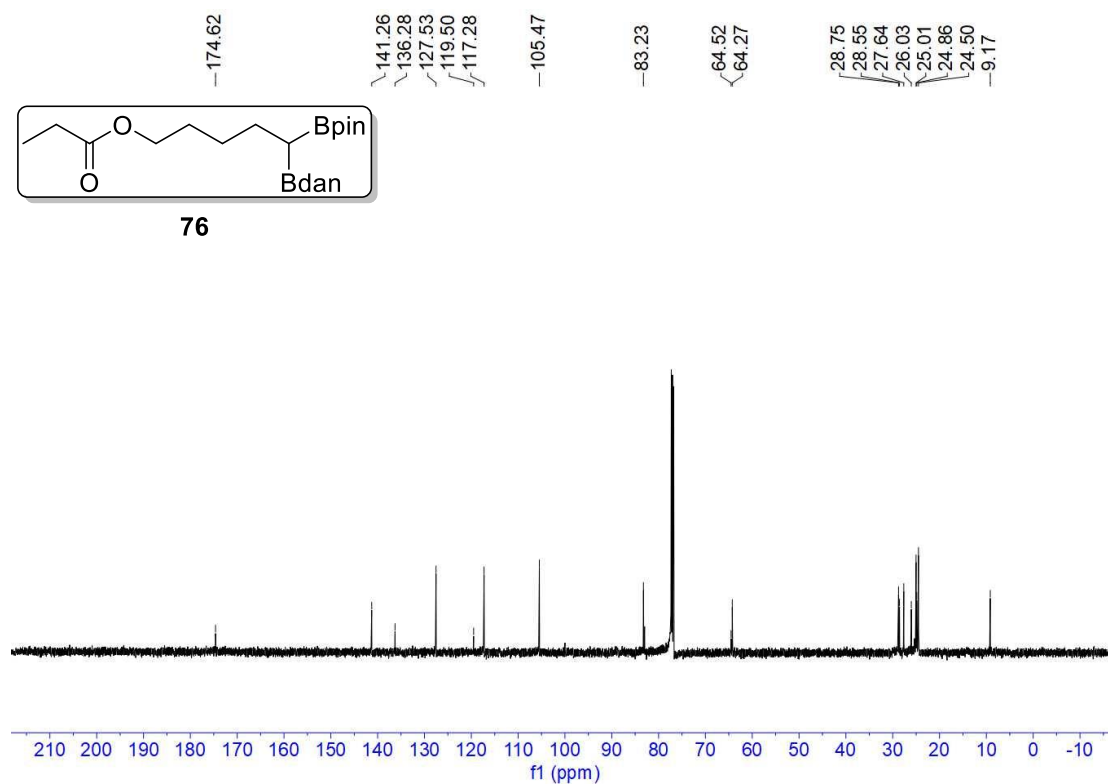

Supplementary Figure 239.  $^{13}\text{C}$  NMR spectrum of compound 76

**$^{11}\text{B}$  NMR (160 MHz, room temperature,  $\text{CDCl}_3$ )**

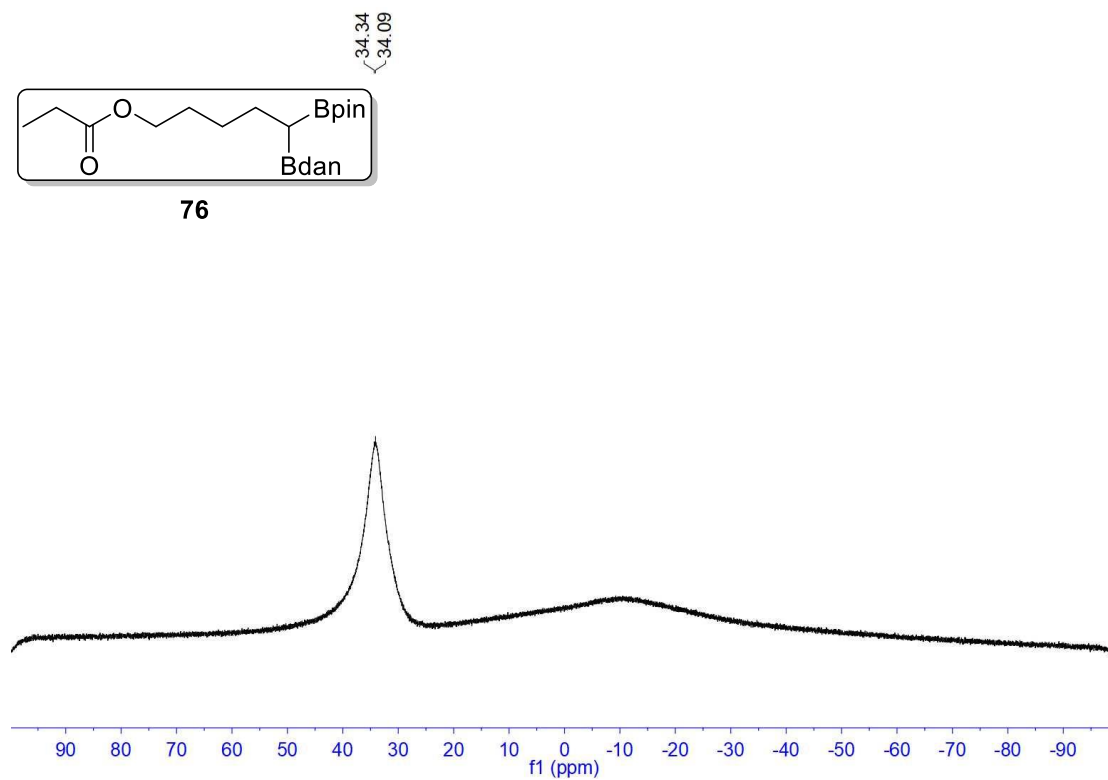

Supplementary Figure 240.  $^{11}\text{B}$  NMR spectrum of compound 76

**(R)-5-(1H-naphtho[1,8-de][1,3,2]diazaborinin-2(3H)-yl)-5-(4,4,5,5-tetramethyl-1,3,2-dioxaborolan-2-yl)pentyl (2E,4E)-hexa-2,4-dienoate (77)**

<sup>1</sup>H NMR (500 MHz, room temperature, CDCl<sub>3</sub>)

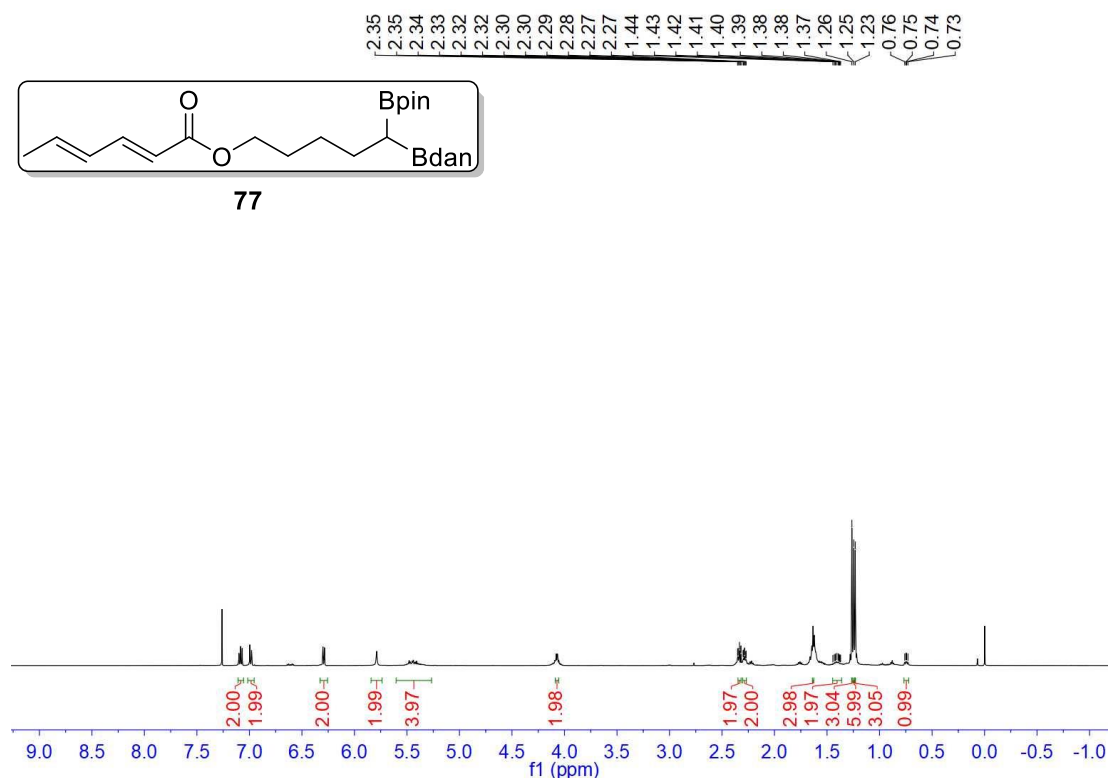

Supplementary Figure 241. <sup>1</sup>H NMR spectrum of compound 77

<sup>13</sup>C NMR (126 MHz, room temperature, CDCl<sub>3</sub>)

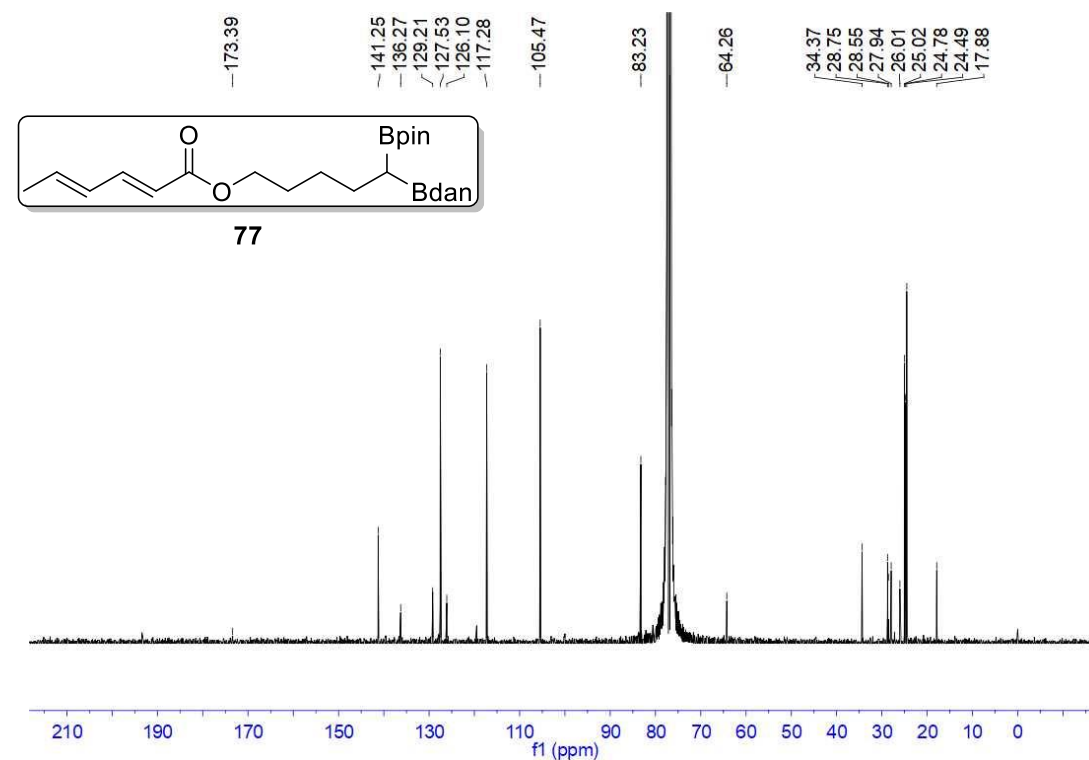

Supplementary Figure 242. <sup>13</sup>C NMR spectrum of compound 77

<sup>11</sup>B NMR (160 MHz, room temperature, CDCl<sub>3</sub>)

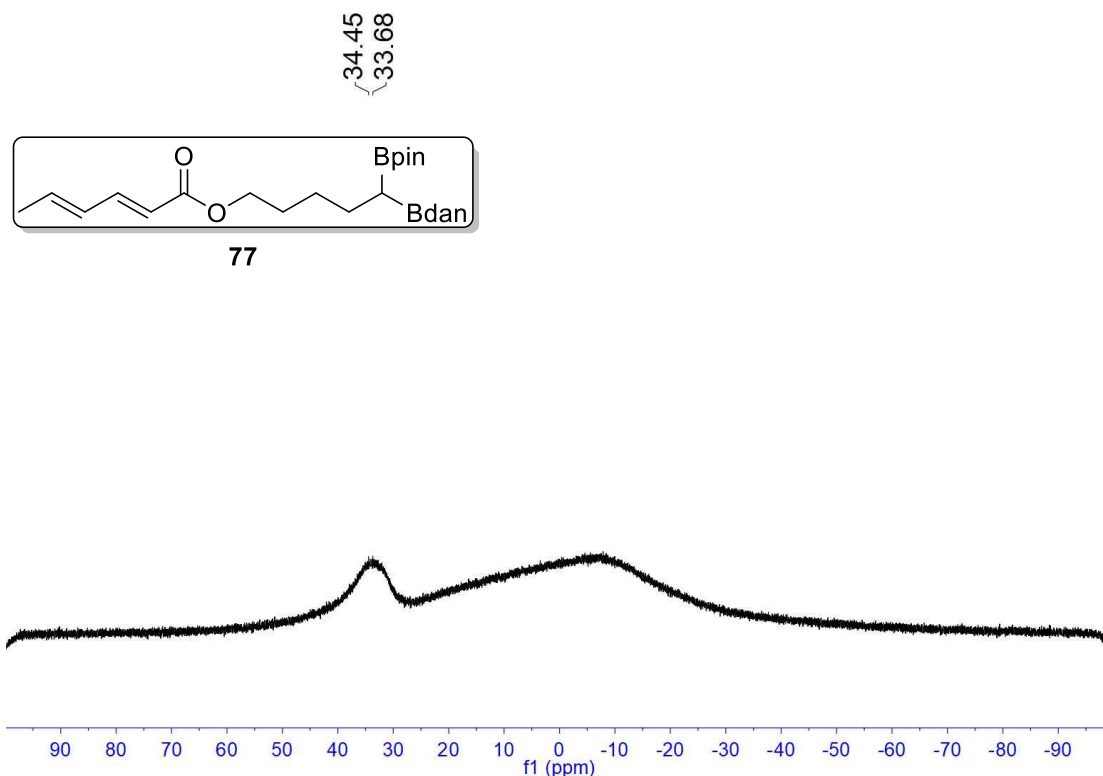

Supplementary Figure 243. <sup>11</sup>B NMR spectrum of compound 77

(R)-5-(1H-naphtho[1,8-de][1,3,2]diazaborinin-2(3H)-yl)-5-(4,4,5,5-tetramethyl-1,3,2-dioxaborolan-2-yl)pentyl 2-propylpentanoate (78)

<sup>1</sup>H NMR (500 MHz, room temperature, CDCl<sub>3</sub>)

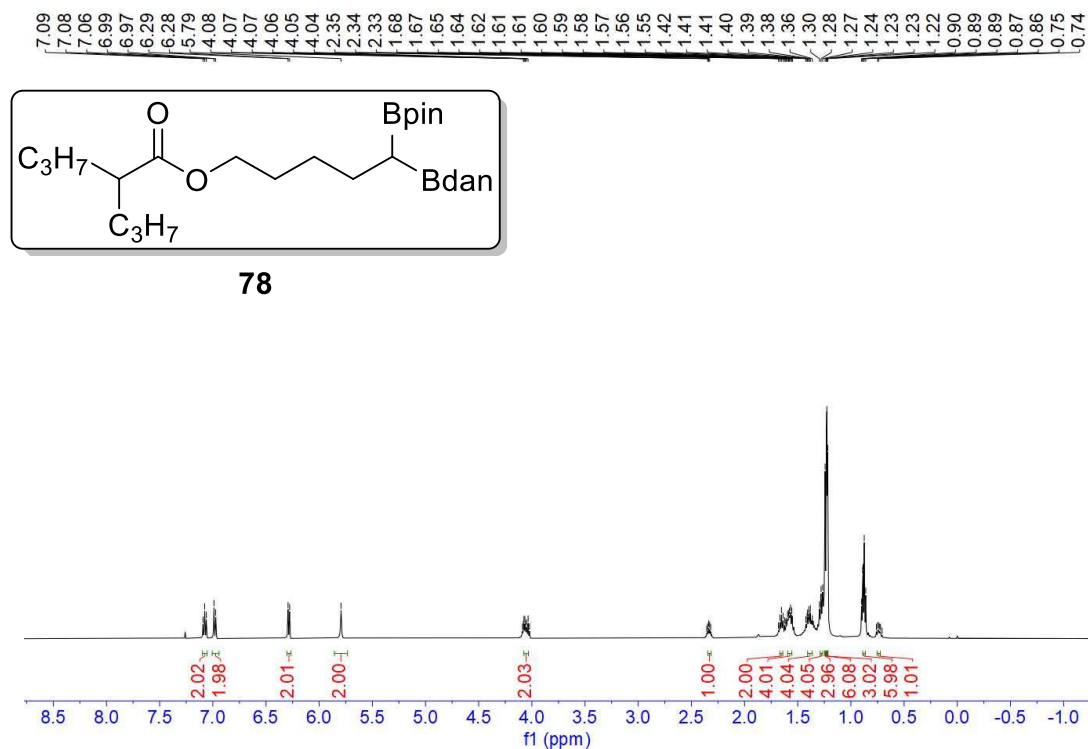

Supplementary Figure 244. <sup>1</sup>H NMR spectrum of compound 78

$^{13}\text{C}$  NMR (126 MHz, room temperature,  $\text{CDCl}_3$ )

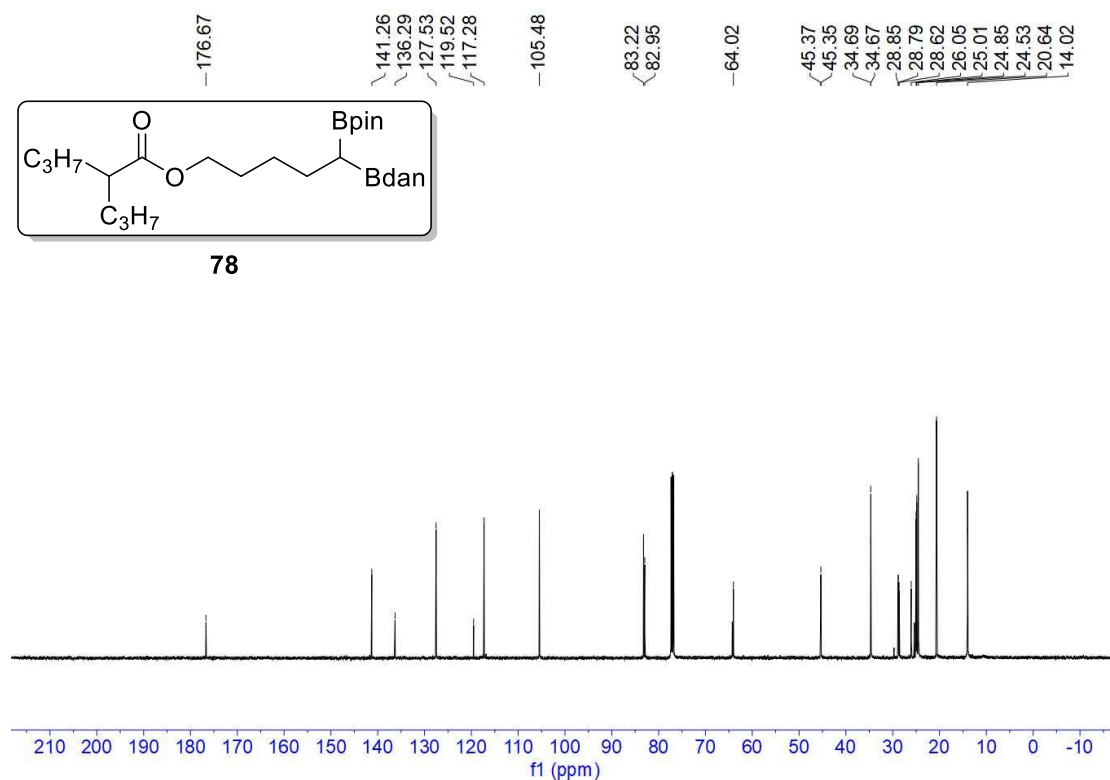

Supplementary Figure 245.  $^{13}\text{C}$  NMR spectrum of compound 78

$^{11}\text{B}$  NMR (160 MHz, room temperature,  $\text{CDCl}_3$ )

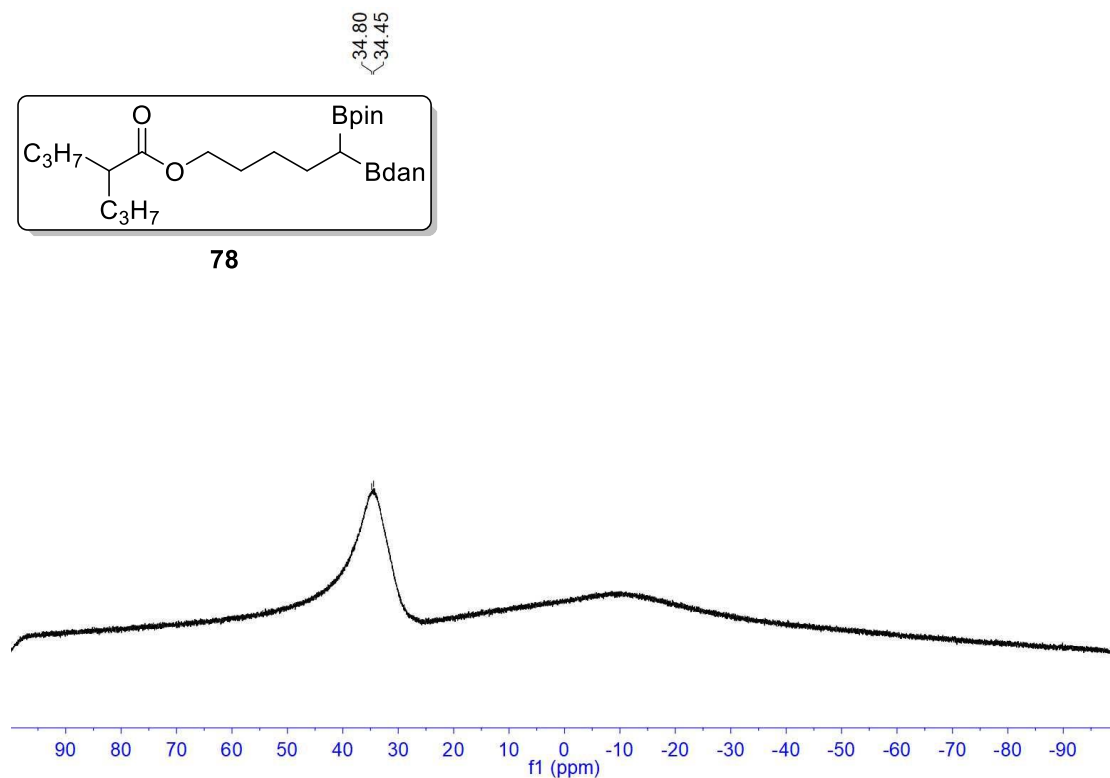

Supplementary Figure 246.  $^{11}\text{B}$  NMR spectrum of compound 78

**(R)-5-(1H-naphtho[1,8-de][1,3,2]diazaborinin-2(3H)-yl)-5-(4,4,5,5-tetramethyl-1,3,2-dioxaborolan-2-yl)pentyl benzoate (79)**

**<sup>1</sup>H NMR (500 MHz, room temperature, CDCl<sub>3</sub>)**

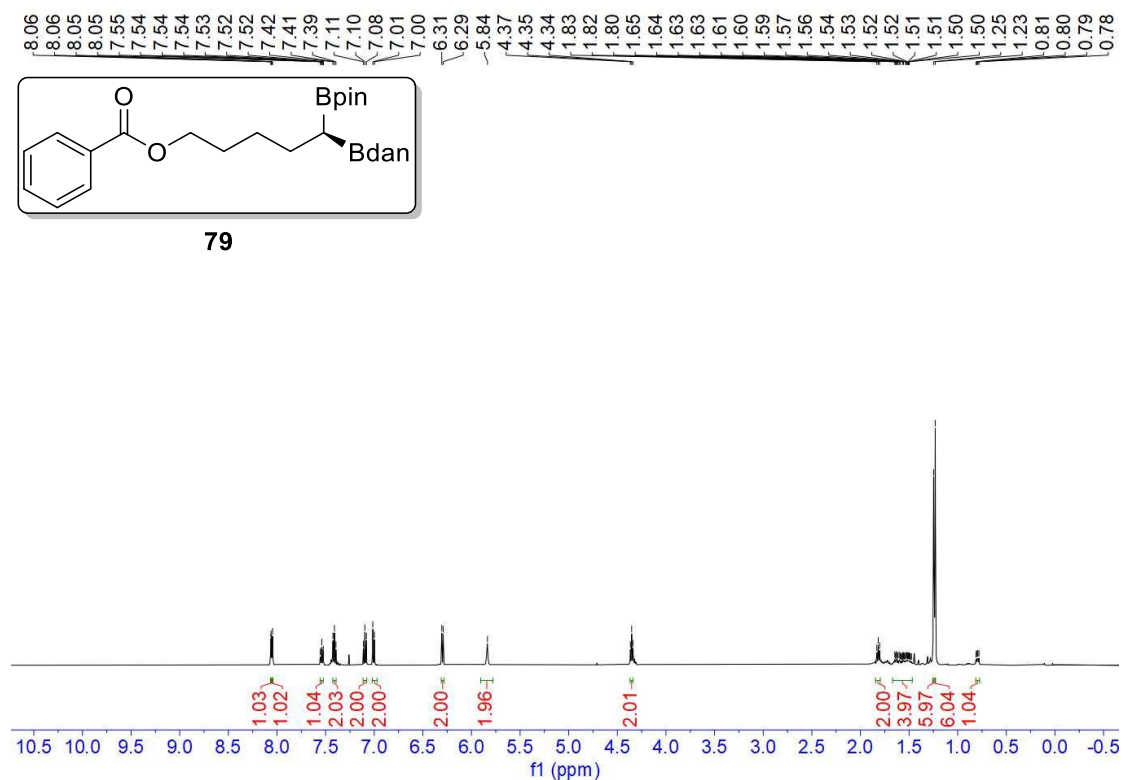

**79**

**Supplementary Figure 247. <sup>1</sup>H NMR spectrum of compound 79**

**<sup>13</sup>C NMR (126 MHz, room temperature, CDCl<sub>3</sub>)**

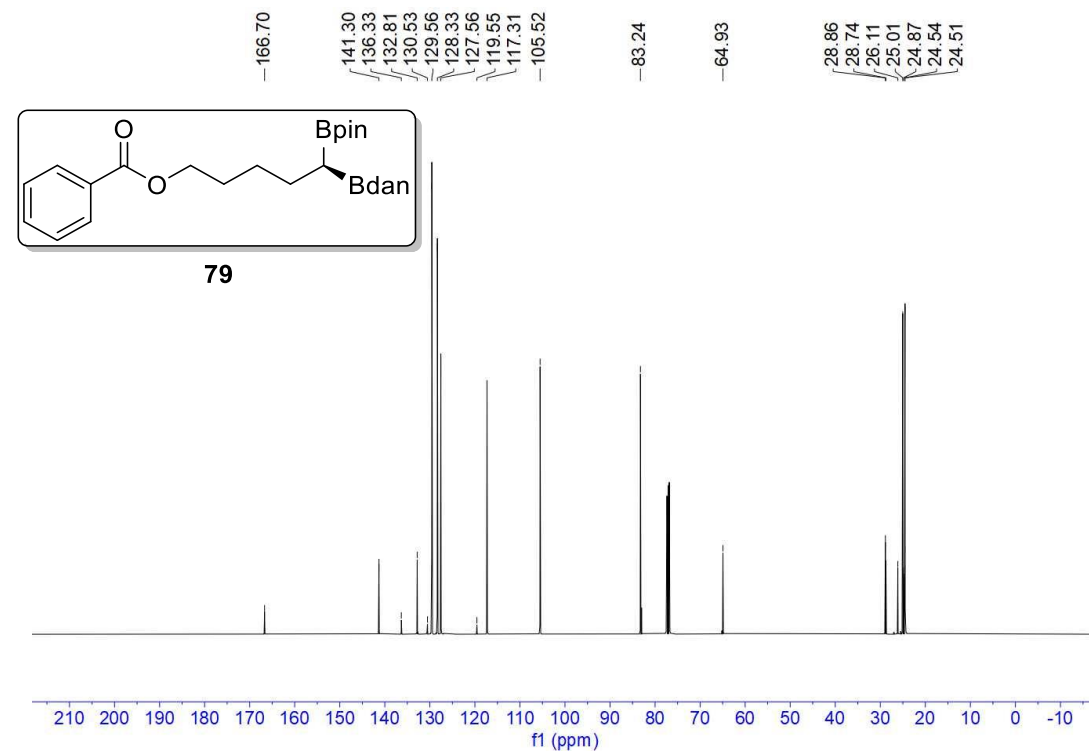

**79**

**Supplementary Figure 248. <sup>13</sup>C NMR spectrum of compound 79**



$^{11}\text{B}$  NMR (160 MHz, room temperature,  $\text{CDCl}_3$ )

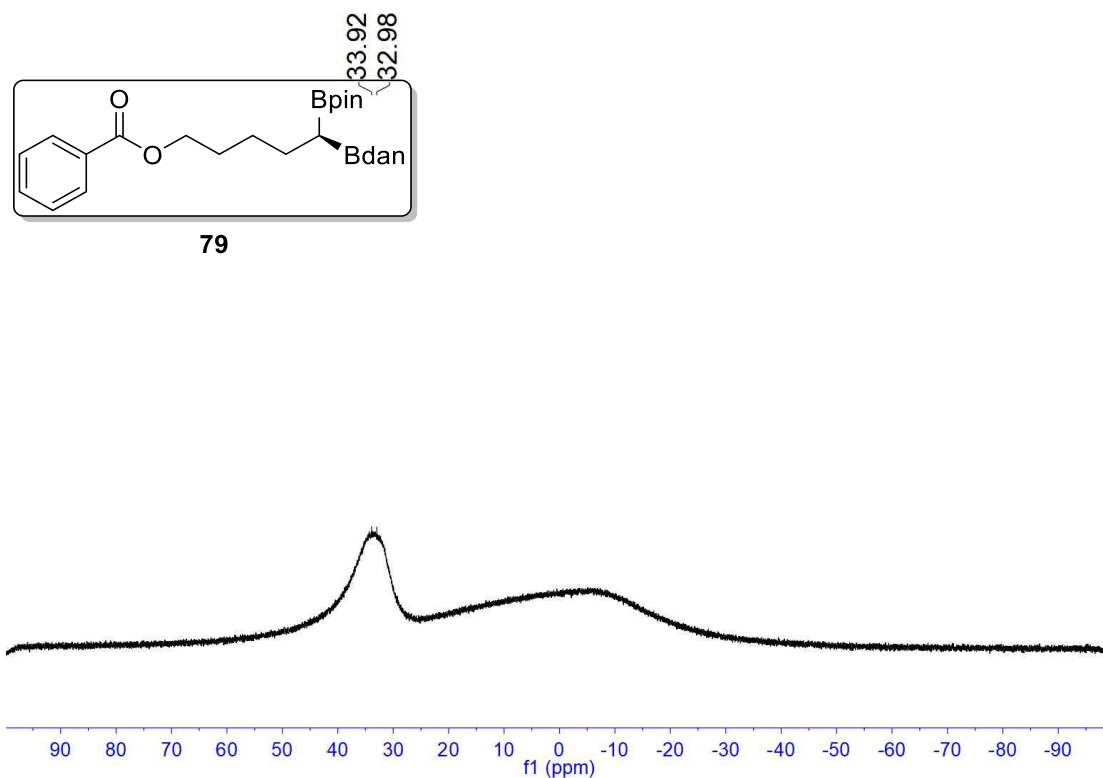

Supplementary Figure 249.  $^{11}\text{B}$  NMR spectrum of compound 79

(R)-5-(1H-naphtho[1,8-de][1,3,2]diazaborinin-2(3H)-yl)-5-(4,4,5,5-tetramethyl-1,3,2-dioxaborolan-2-yl)pentyl 4-methylbenzoate (80)

$^1\text{H}$  NMR (500 MHz, room temperature,  $\text{CDCl}_3$ )

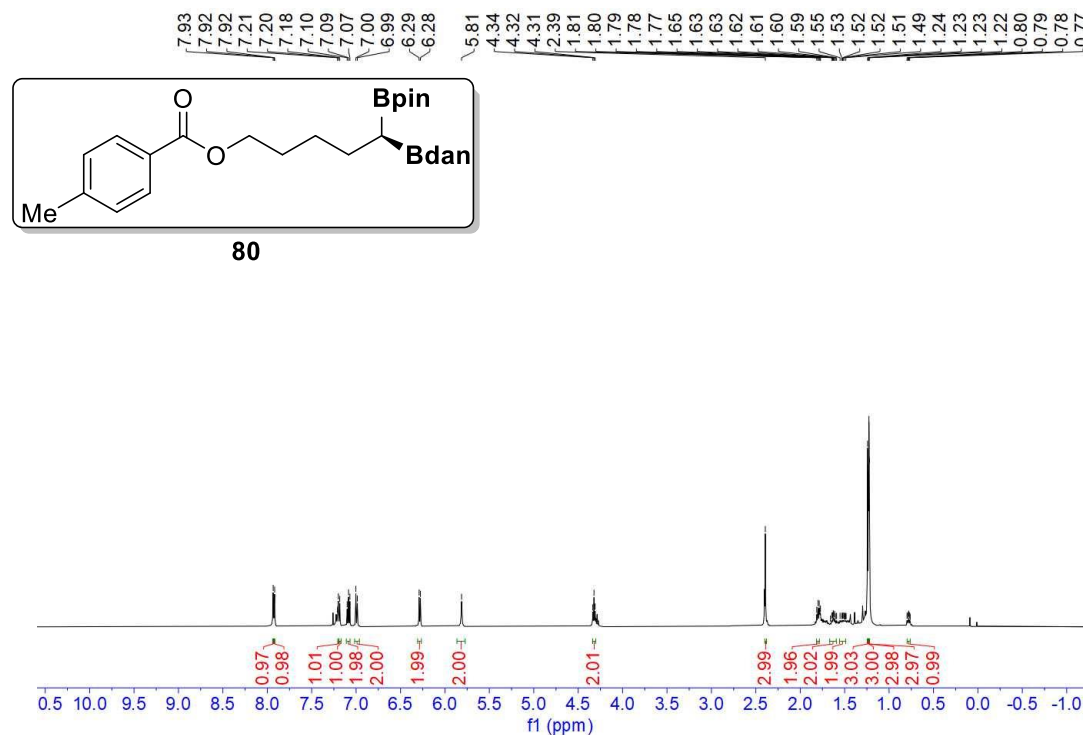

Supplementary Figure 250.  $^1\text{H}$  NMR spectrum of compound 80

$^{13}\text{C}$  NMR (126 MHz, room temperature,  $\text{CDCl}_3$ )

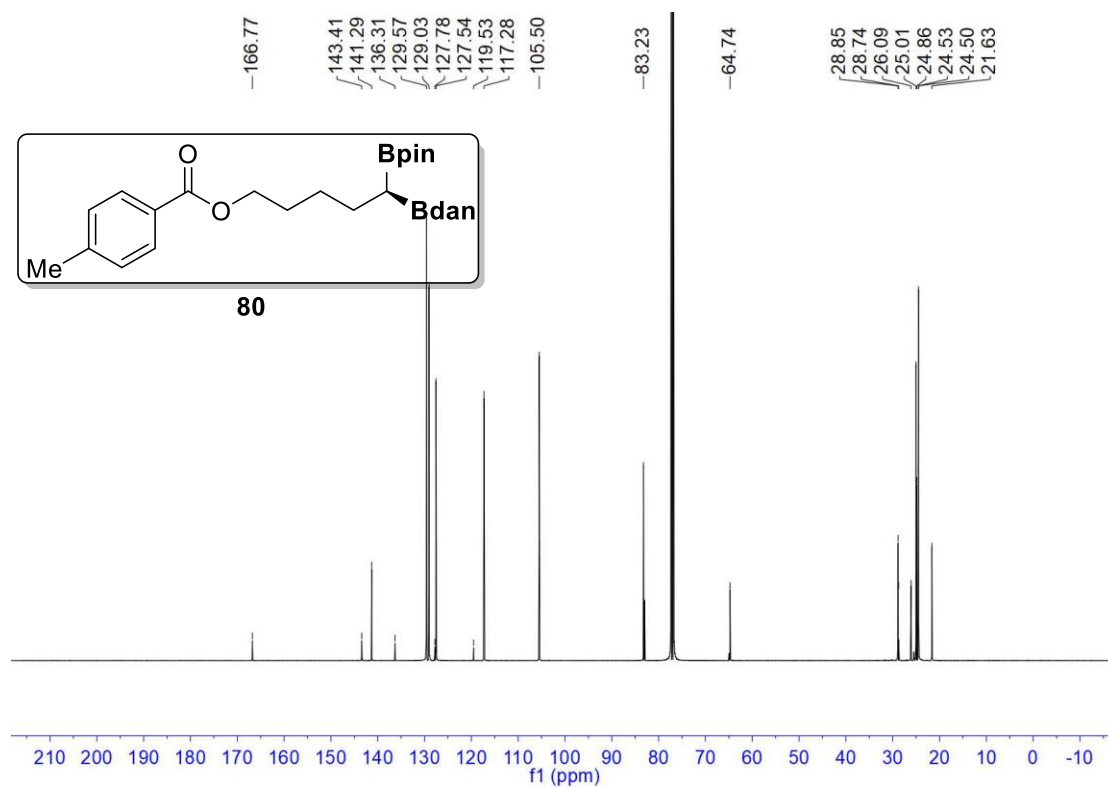

Supplementary Figure 251.  $^{13}\text{C}$  NMR spectrum of compound 80

$^{11}\text{B}$  NMR (160 MHz, room temperature,  $\text{CDCl}_3$ )

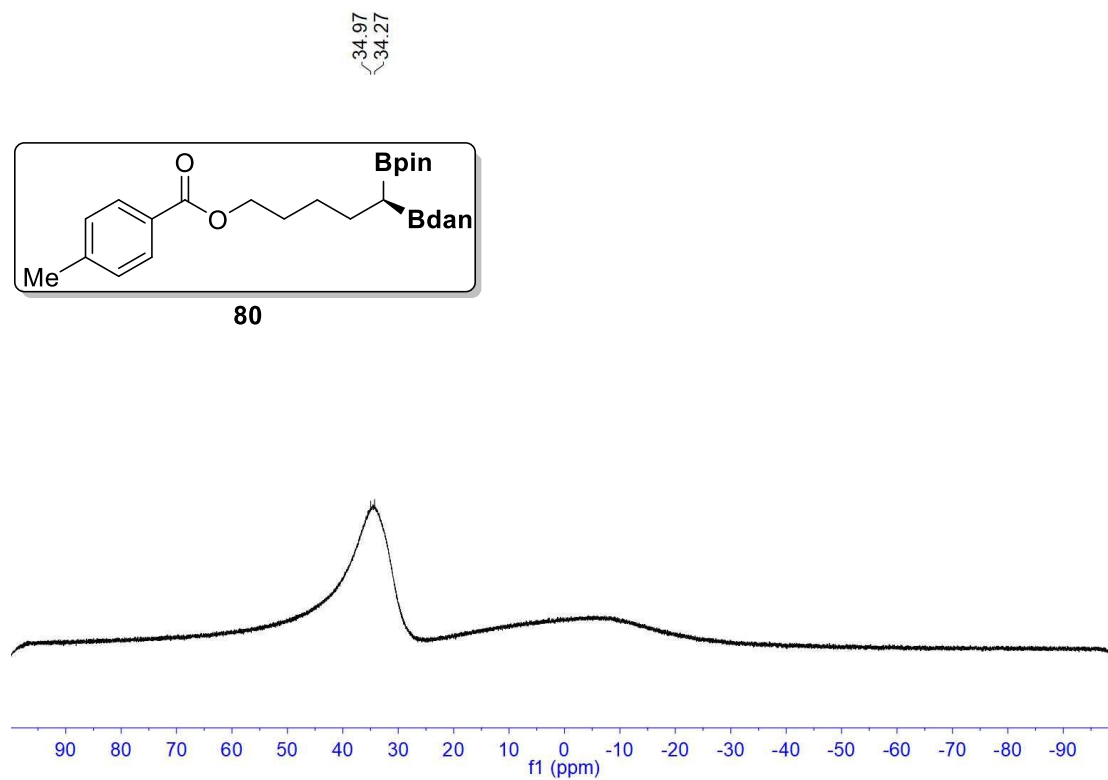

Supplementary Figure 252.  $^{11}\text{B}$  NMR spectrum of compound 80

**(R)-5-(1H-naphtho[1,8-de][1,3,2]diazaborinin-2(3H)-yl)-5-(4,4,5,5-tetramethyl-1,3,2-dioxaborolan-2-yl)pentyl 4-cyclohexylbenzoate (81)**

**<sup>1</sup>H NMR (500 MHz, room temperature, CDCl<sub>3</sub>)**

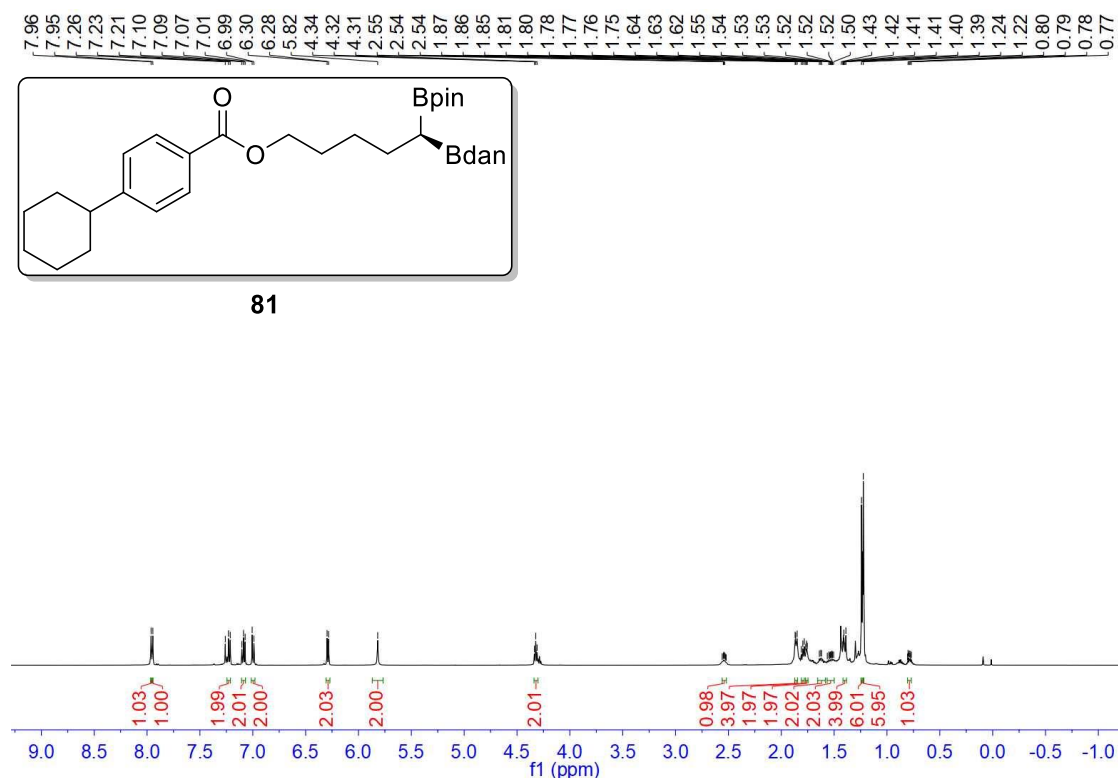

**Supplementary Figure 253. <sup>1</sup>H NMR spectrum of compound 81**

**<sup>13</sup>C NMR (126 MHz, room temperature, CDCl<sub>3</sub>)**

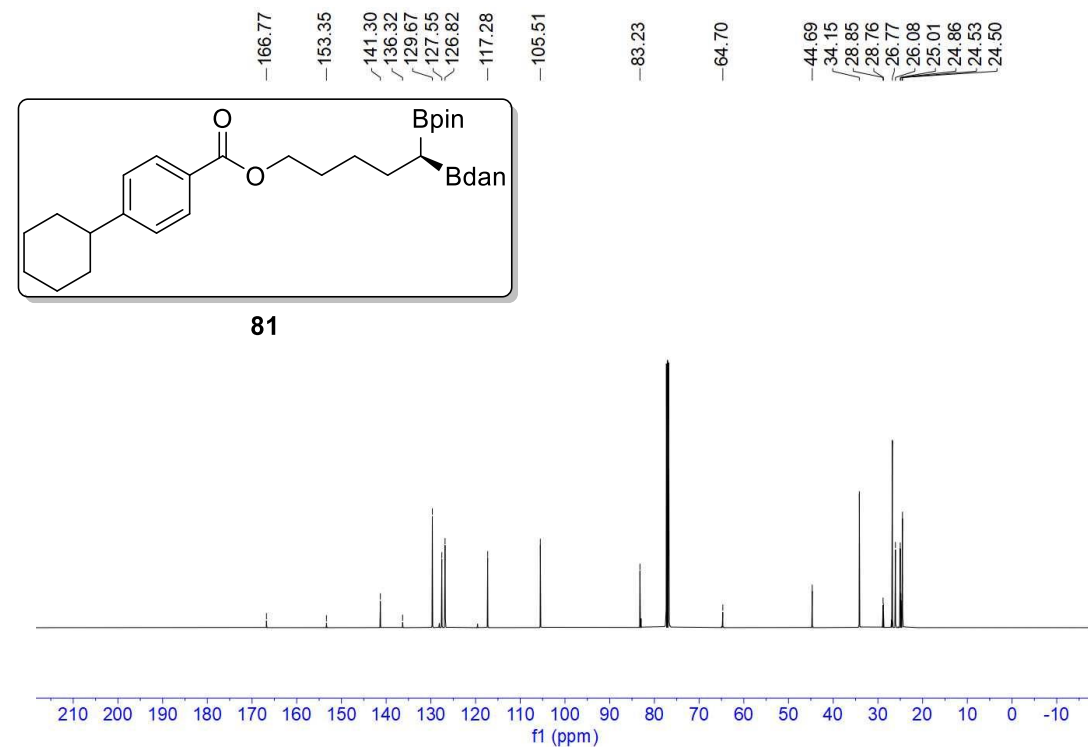

**Supplementary Figure 254. <sup>13</sup>C NMR spectrum of compound 81**

**<sup>11</sup>B NMR (160 MHz, room temperature, CDCl<sub>3</sub>)**

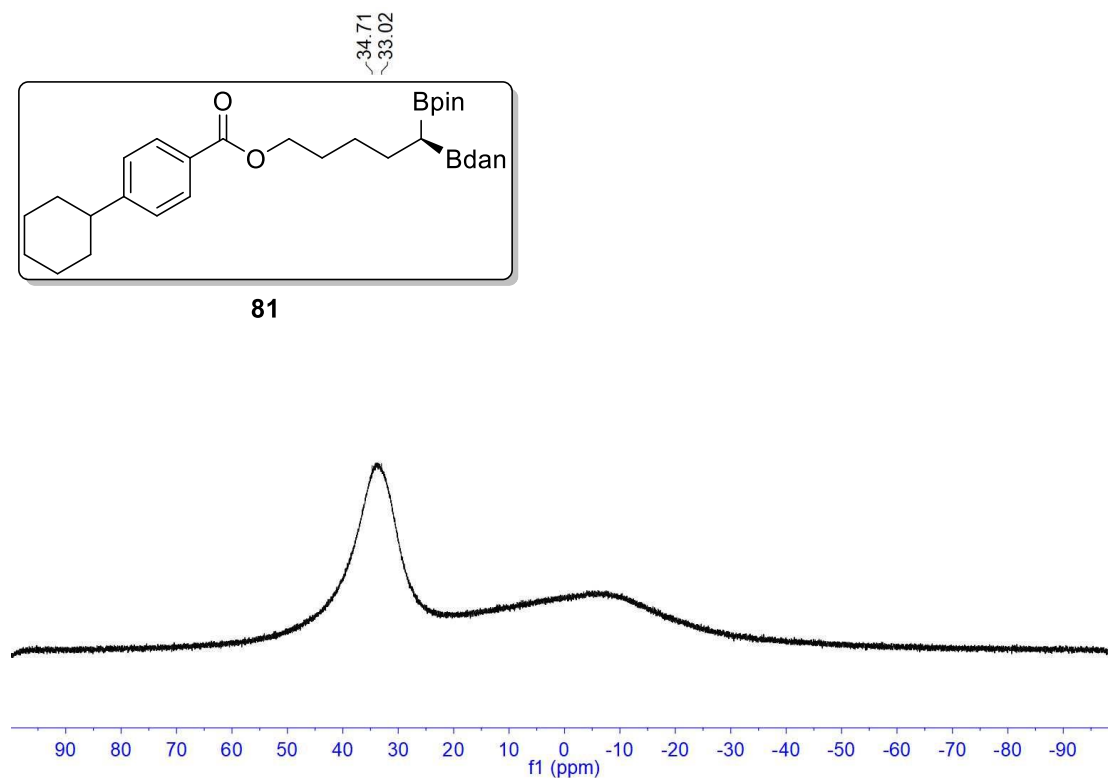

81

Supplementary Figure 255. <sup>11</sup>B NMR spectrum of compound 81

(R)-5-(1H-naphtho[1,8-de][1,3,2]diazaborinin-2(3H)-yl)-5-(4,4,5,5-tetramethyl-1,3,2-dioxaborolan-2-yl)pentyl (E)-2-methyl-3-phenylacrylate (82)

**<sup>1</sup>H NMR (500 MHz, room temperature, CDCl<sub>3</sub>)**

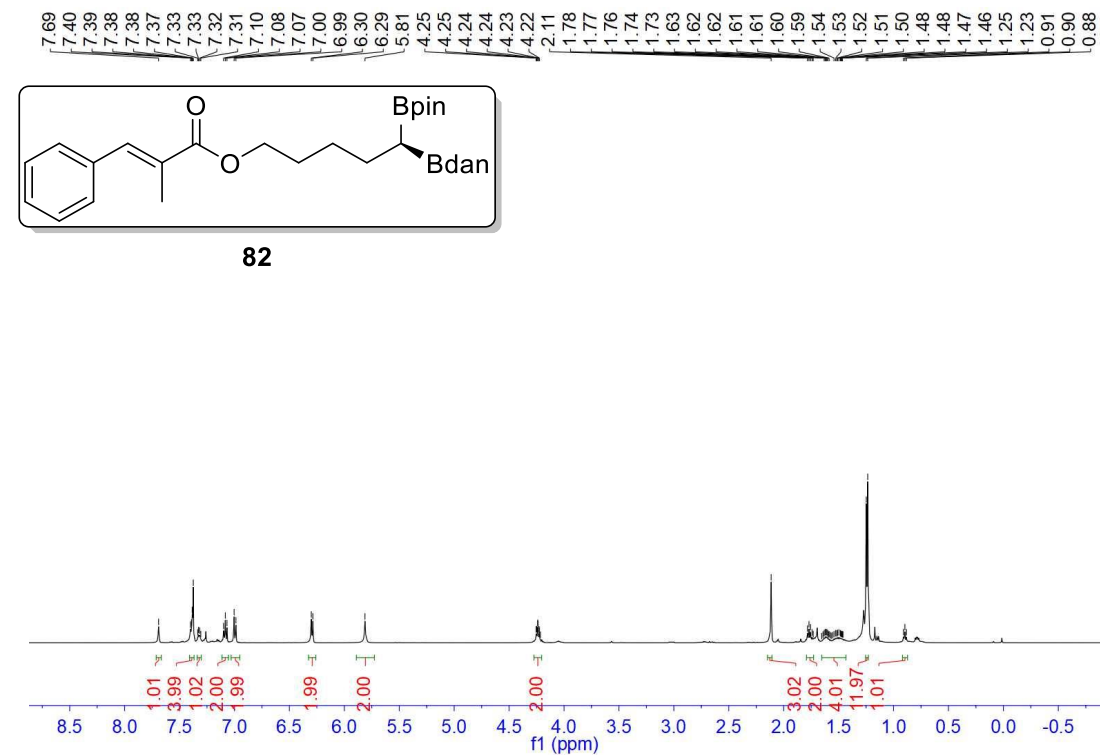

82

Supplementary Figure 256. <sup>1</sup>H NMR spectrum of compound 82

$^{13}\text{C}$  NMR (126 MHz, room temperature,  $\text{CDCl}_3$ )

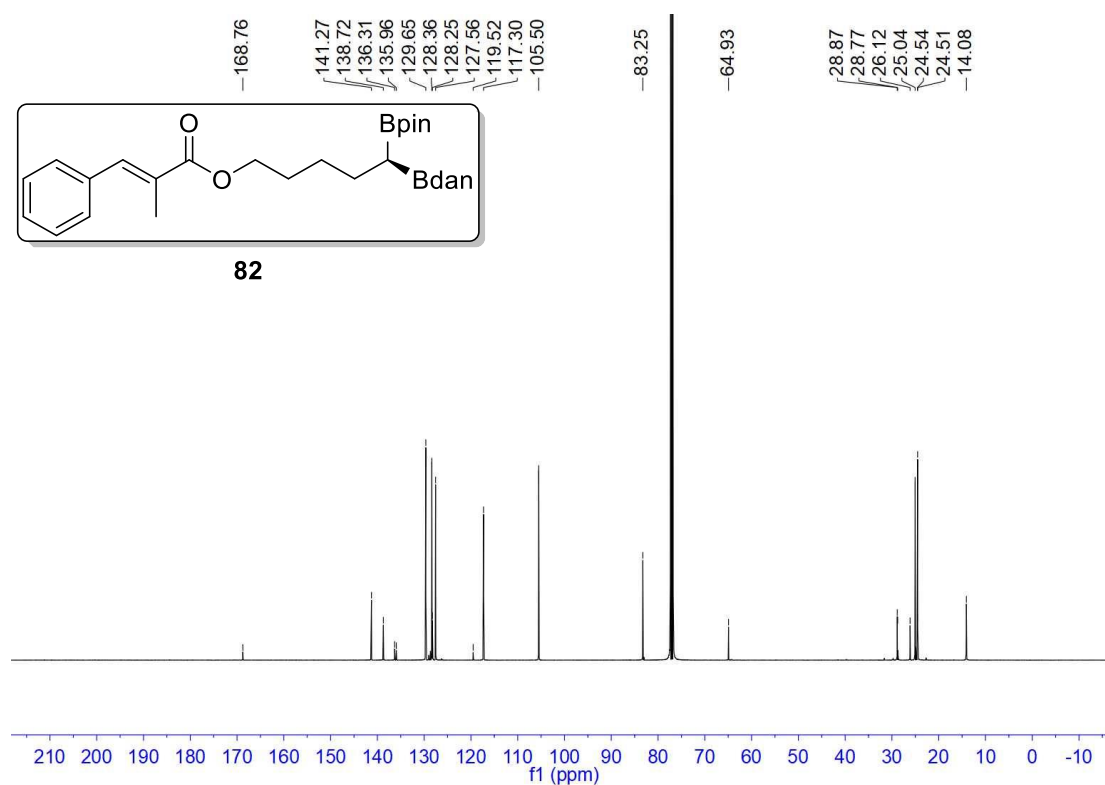

Supplementary Figure 257.  $^{13}\text{C}$  NMR spectrum of compound 82

$^{11}\text{B}$  NMR (160 MHz, room temperature,  $\text{CDCl}_3$ )

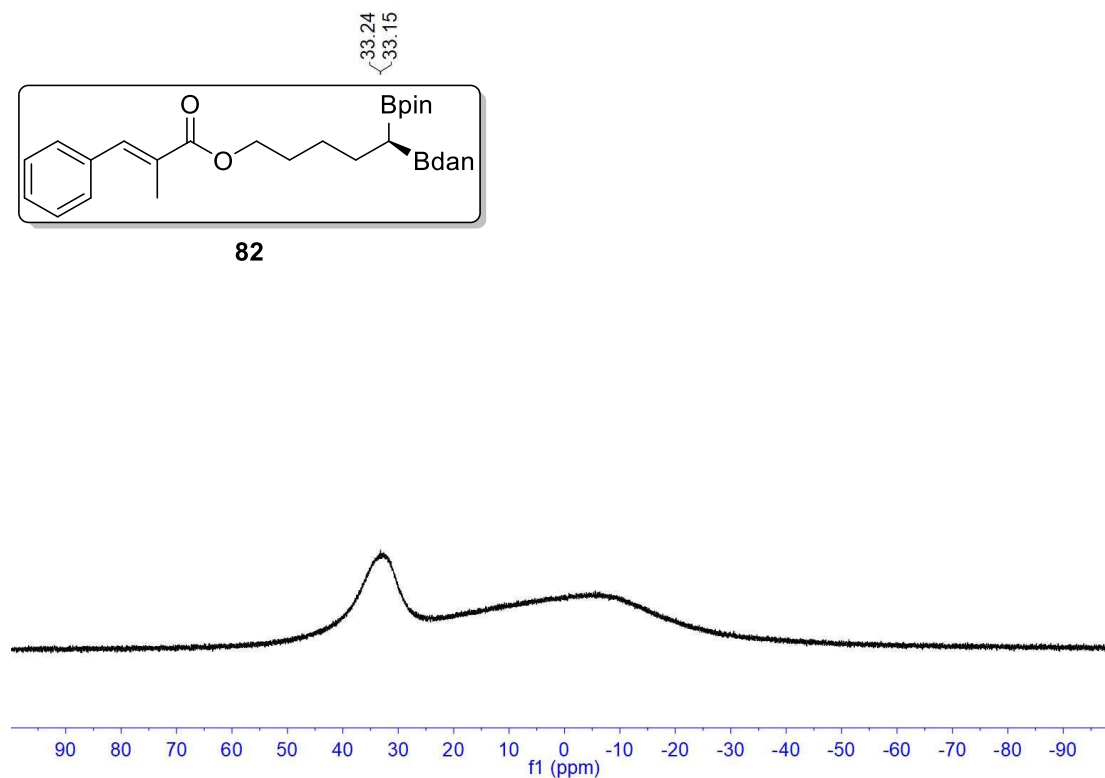

Supplementary Figure 258.  $^{11}\text{B}$  NMR spectrum of compound 82

**(R)-5-(1H-naphtho[1,8-de][1,3,2]diazaborinin-2(3H)-yl)-5-(4,4,5,5-tetramethyl-1,3,2-dioxaborolan-2-yl)pentyl (2R)-2-phenylpropanoate (83)**

<sup>1</sup>H NMR (500 MHz, room temperature, CDCl<sub>3</sub>)

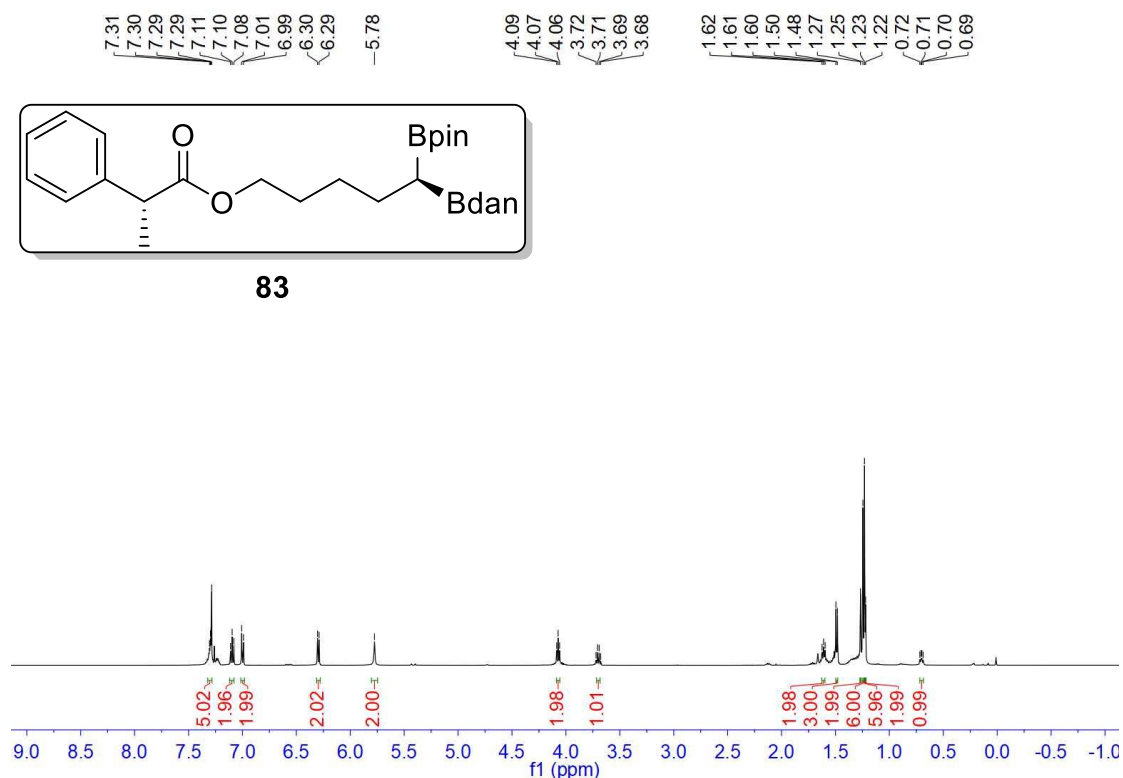

Supplementary Figure 259. <sup>1</sup>H NMR spectrum of compound 83

<sup>13</sup>C NMR (126 MHz, room temperature, CDCl<sub>3</sub>)

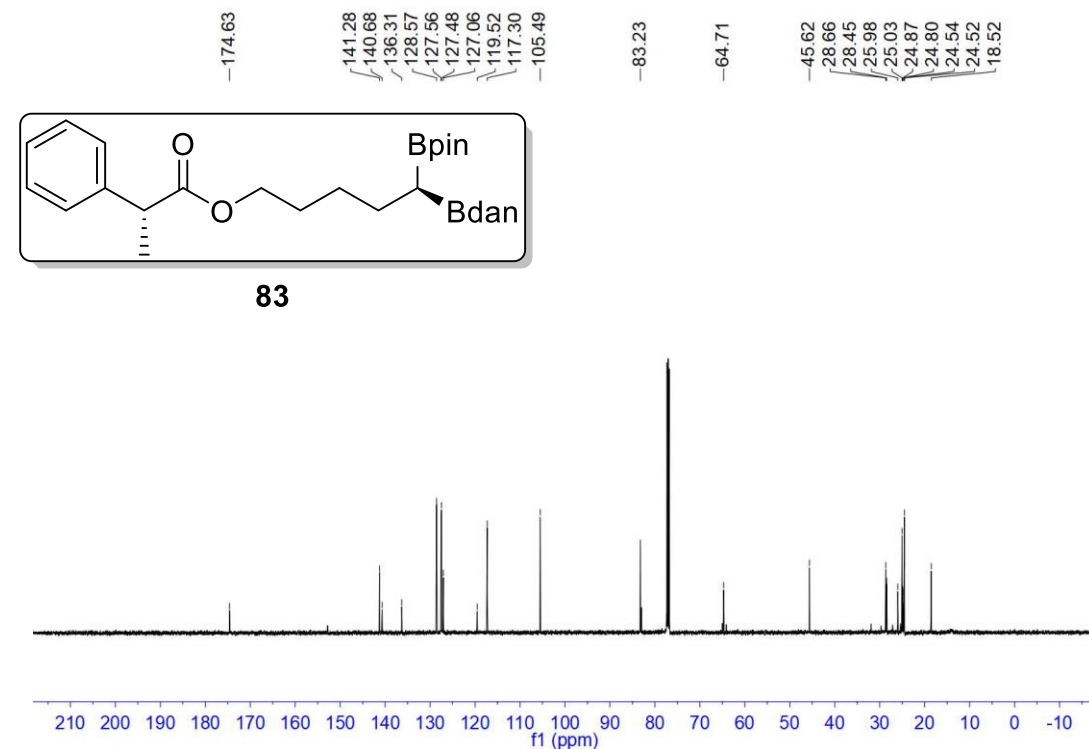

Supplementary Figure 260. <sup>13</sup>C NMR spectrum of compound 83

$^{11}\text{B}$  NMR (160 MHz, room temperature,  $\text{CDCl}_3$ )

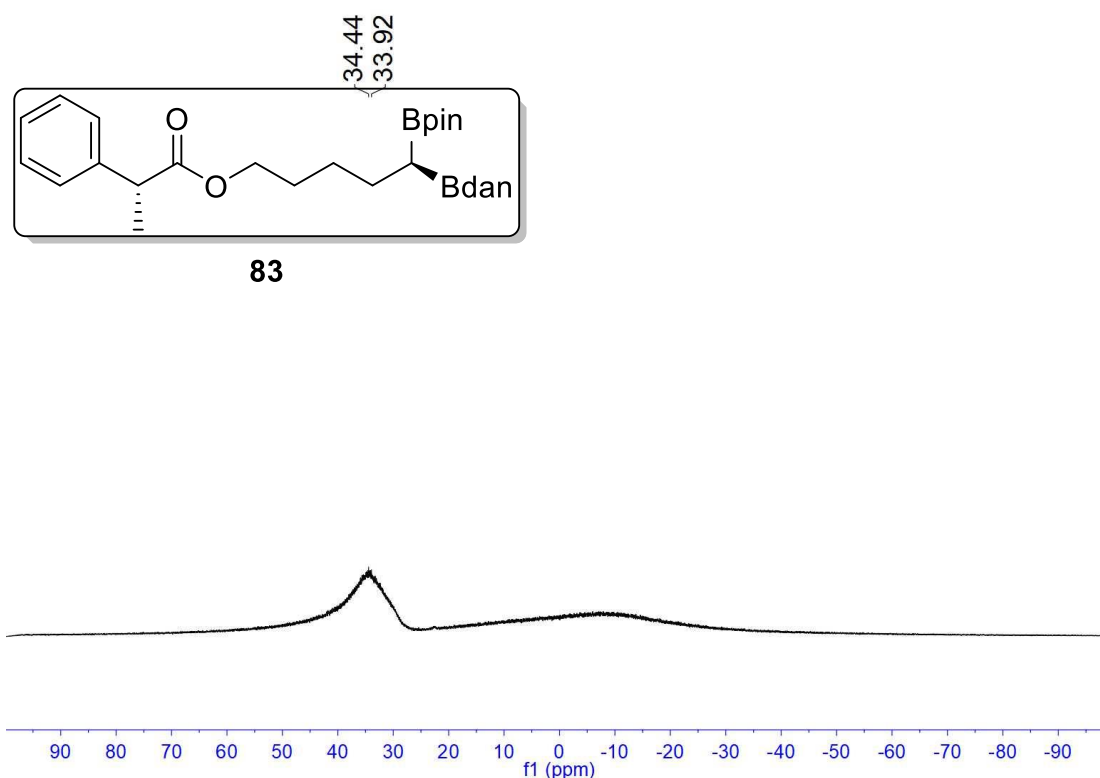

83

Supplementary Figure 261.  $^{11}\text{B}$  NMR spectrum of compound 83

(R)-5-(1H-naphtho[1,8-de][1,3,2]diazaborinin-2(3H)-yl)-5-(4,4,5,5-tetramethyl-1,3,2-dioxaborolan-2-yl)pentyl (2S)-2-(4-isobutylphenyl)propanoate (84)

$^1\text{H}$  NMR (500 MHz, room temperature,  $\text{CDCl}_3$ )

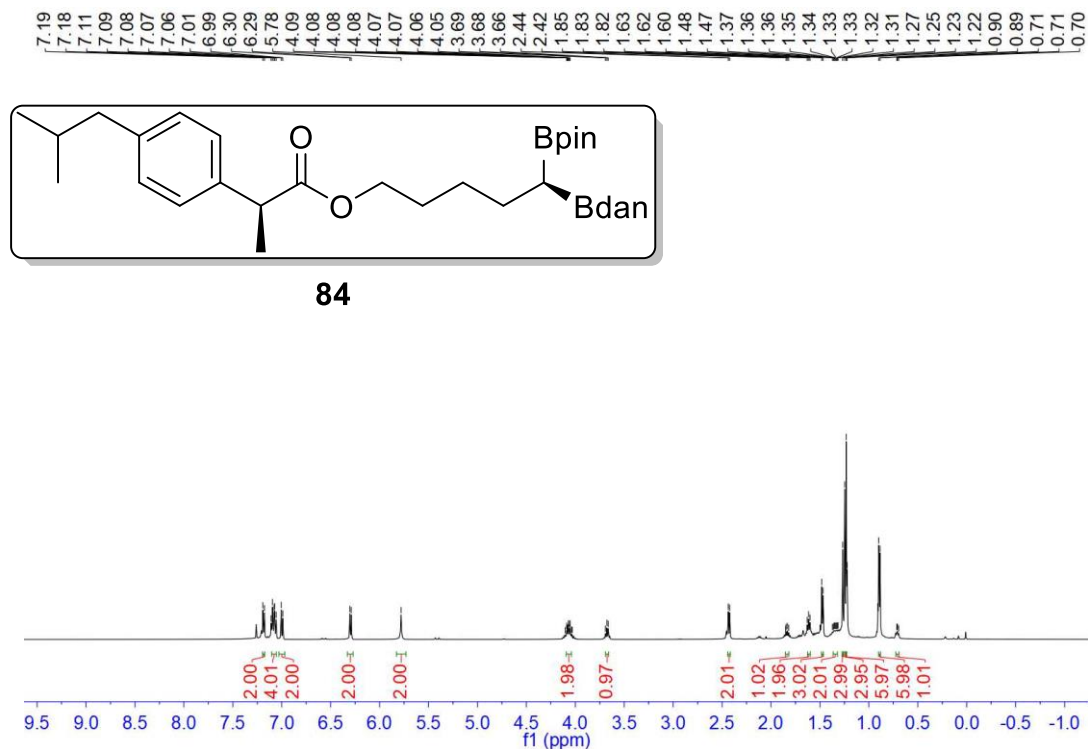

84

Supplementary Figure 262.  $^1\text{H}$  NMR spectrum of compound 84

$^{13}\text{C}$  NMR (126 MHz, room temperature,  $\text{CDCl}_3$ )

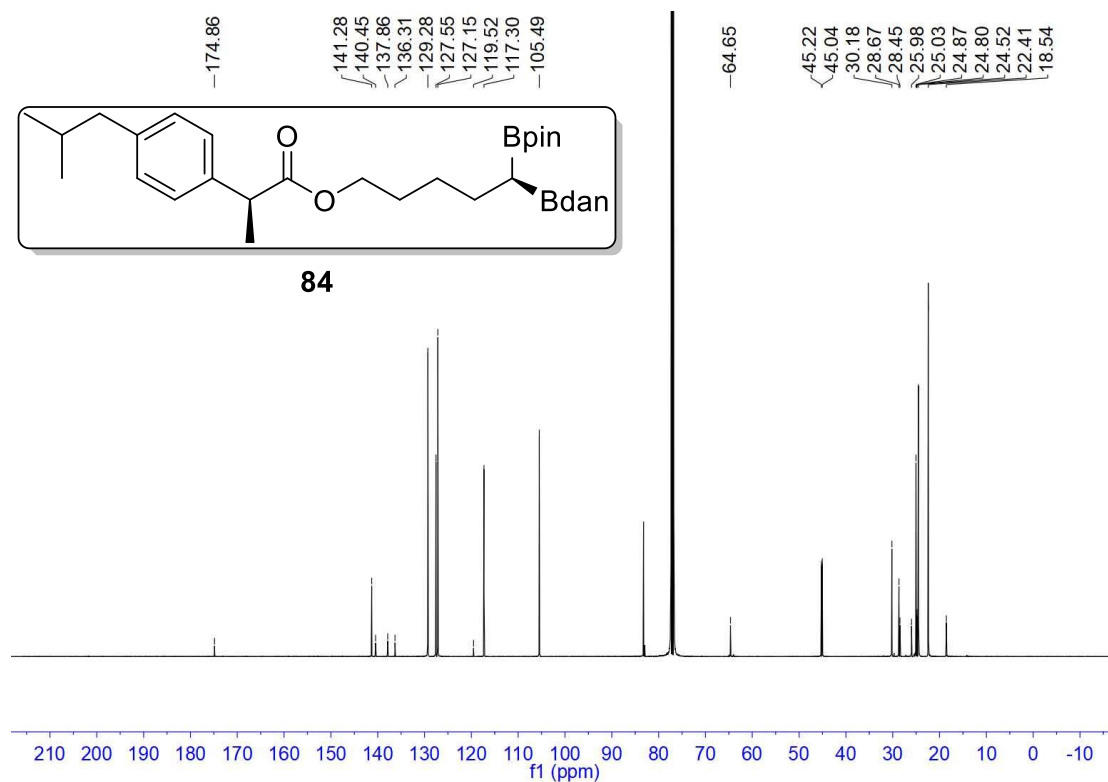

Supplementary Figure 263.  $^{13}\text{C}$  NMR spectrum of compound 84

$^{11}\text{B}$  NMR (160 MHz, room temperature,  $\text{CDCl}_3$ )

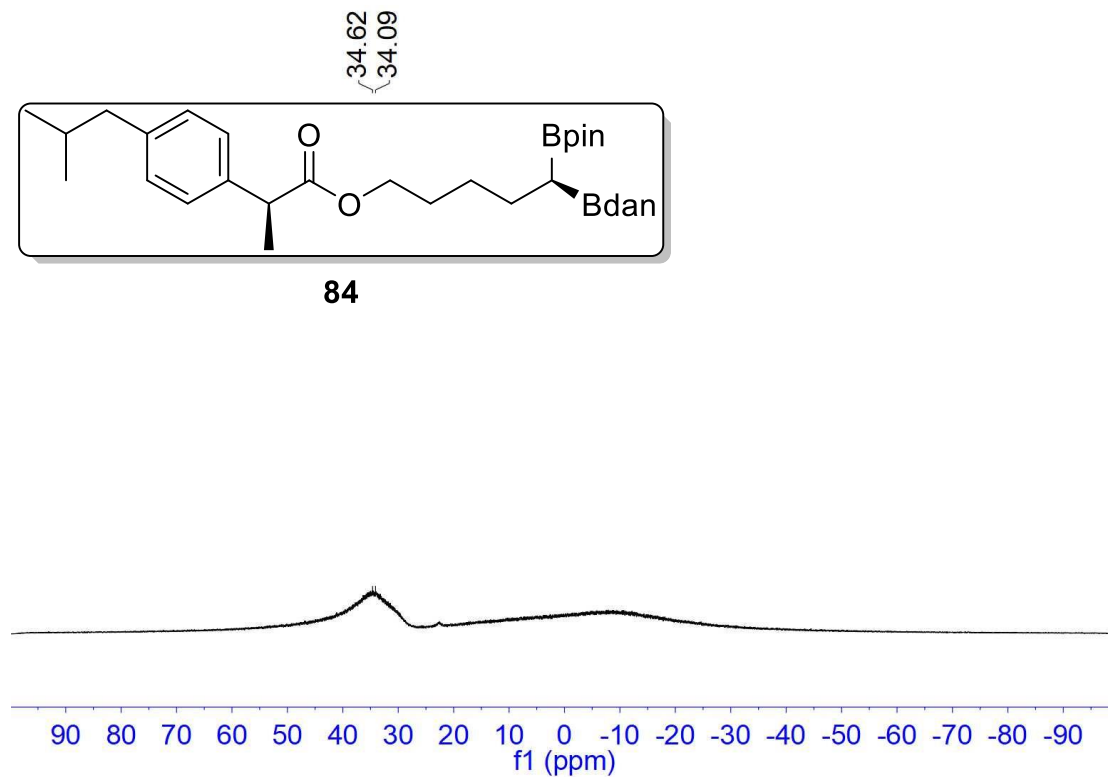

Supplementary Figure 264.  $^{11}\text{B}$  NMR spectrum of compound 84



**(R)-5-(1H-naphtho[1,8-de][1,3,2]diazaborinin-2(3H)-yl)-5-(4,4,5,5-tetramethyl-1,3,2-dioxaborolan-2-yl)pentyl (2R)-2-(6-methoxynaphthalen-2-yl)propanoate (85)**

<sup>1</sup>H NMR (500 MHz, room temperature, CDCl<sub>3</sub>)

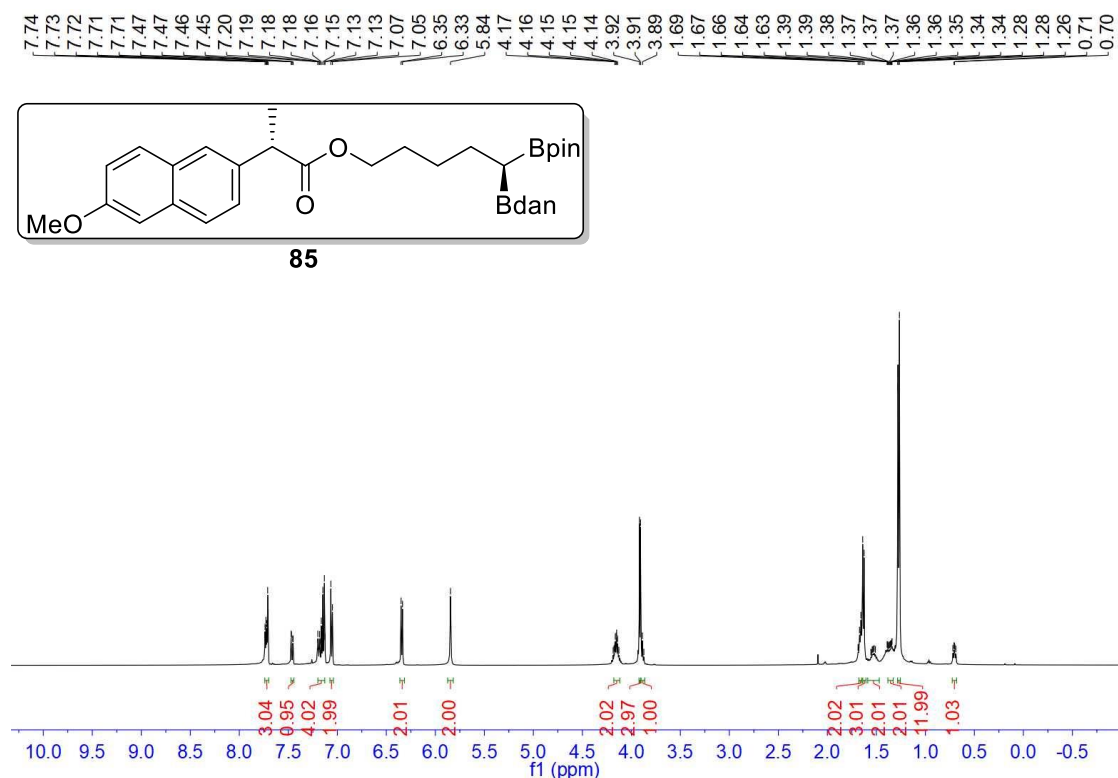

Supplementary Figure 265. <sup>1</sup>H NMR spectrum of compound 85

<sup>13</sup>C NMR (126 MHz, room temperature, CDCl<sub>3</sub>)

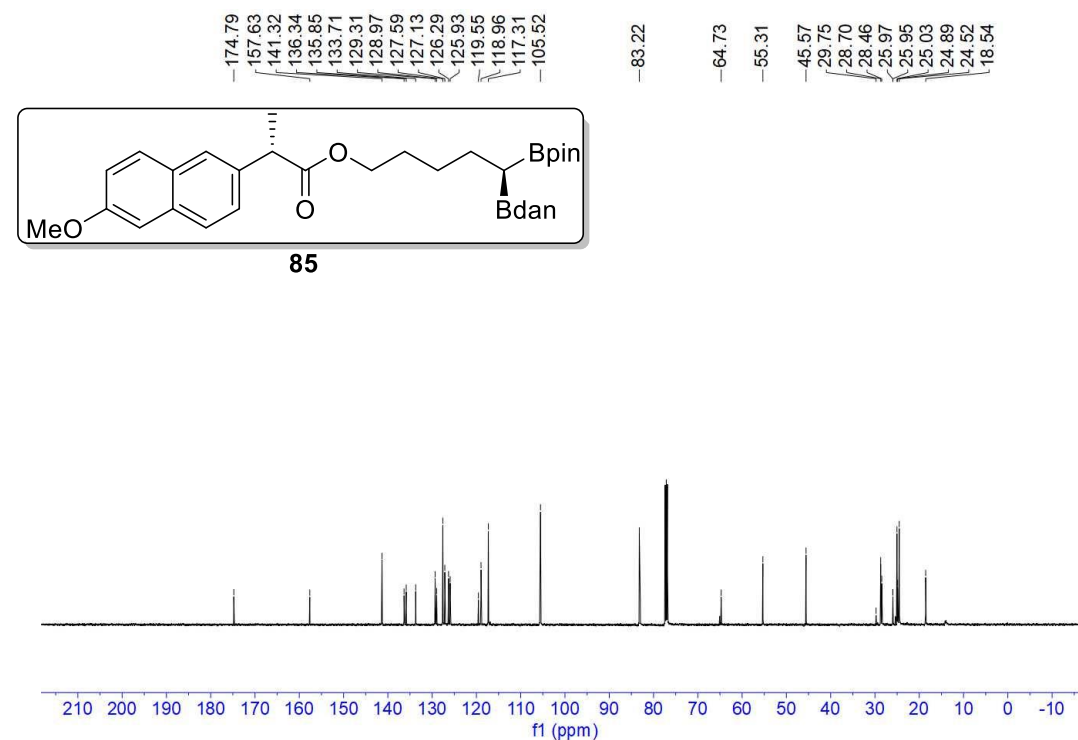

Supplementary Figure 266. <sup>13</sup>C NMR spectrum of compound 85

<sup>11</sup>B NMR (160 MHz, room temperature, CDCl<sub>3</sub>)

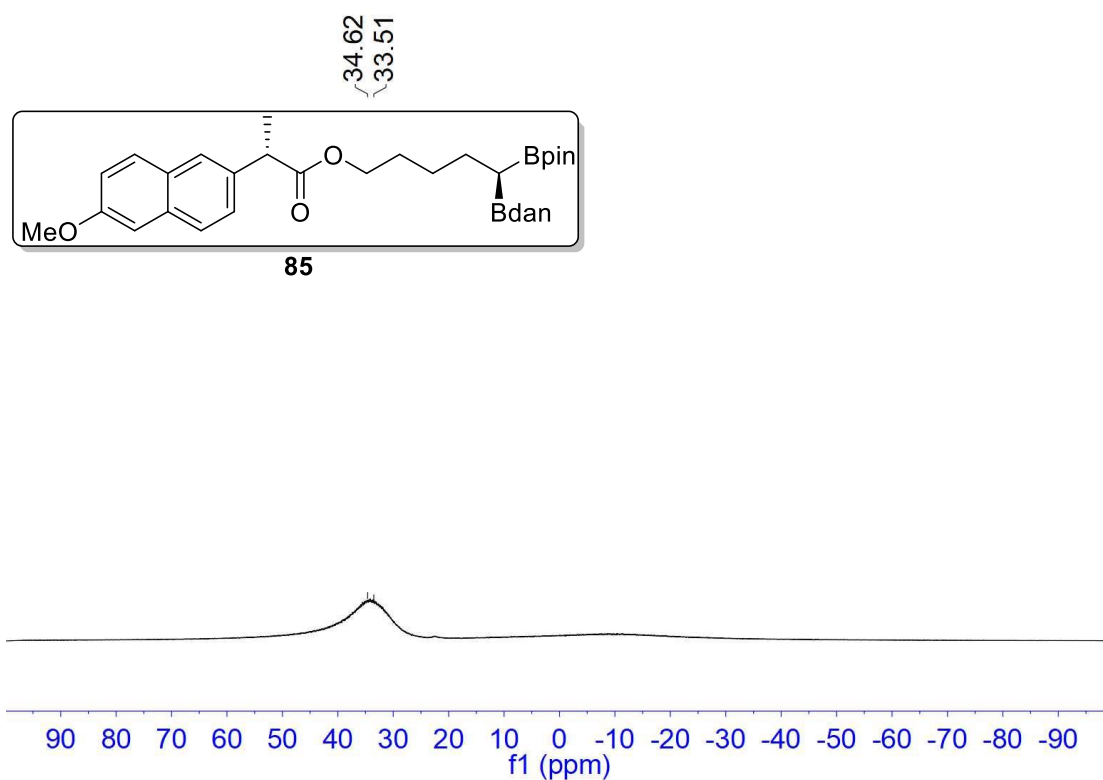

85

Supplementary Figure 267. <sup>11</sup>B NMR spectrum of compound 85

(R)-5-(1H-naphtho[1,8-de][1,3,2]diazaborinin-2(3H)-yl)-5-(4,4,5,5-tetramethyl-1,3,2-dioxaborolan-2-yl)pentyl (1R,2S,4R)-bicyclo[2.2.1]hept-5-ene-2-carboxylate (86)

<sup>1</sup>H NMR (500 MHz, room temperature, CDCl<sub>3</sub>)

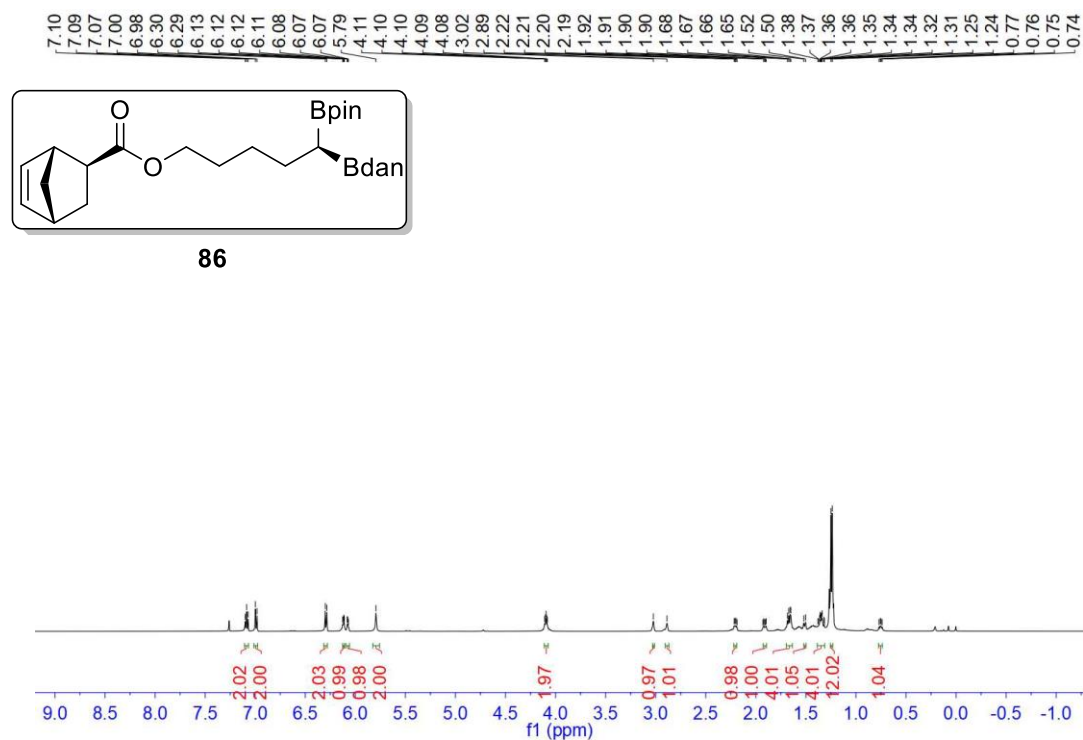

86

Supplementary Figure 268. <sup>1</sup>H NMR spectrum of compound 86

<sup>13</sup>C NMR (126 MHz, room temperature, CDCl<sub>3</sub>)

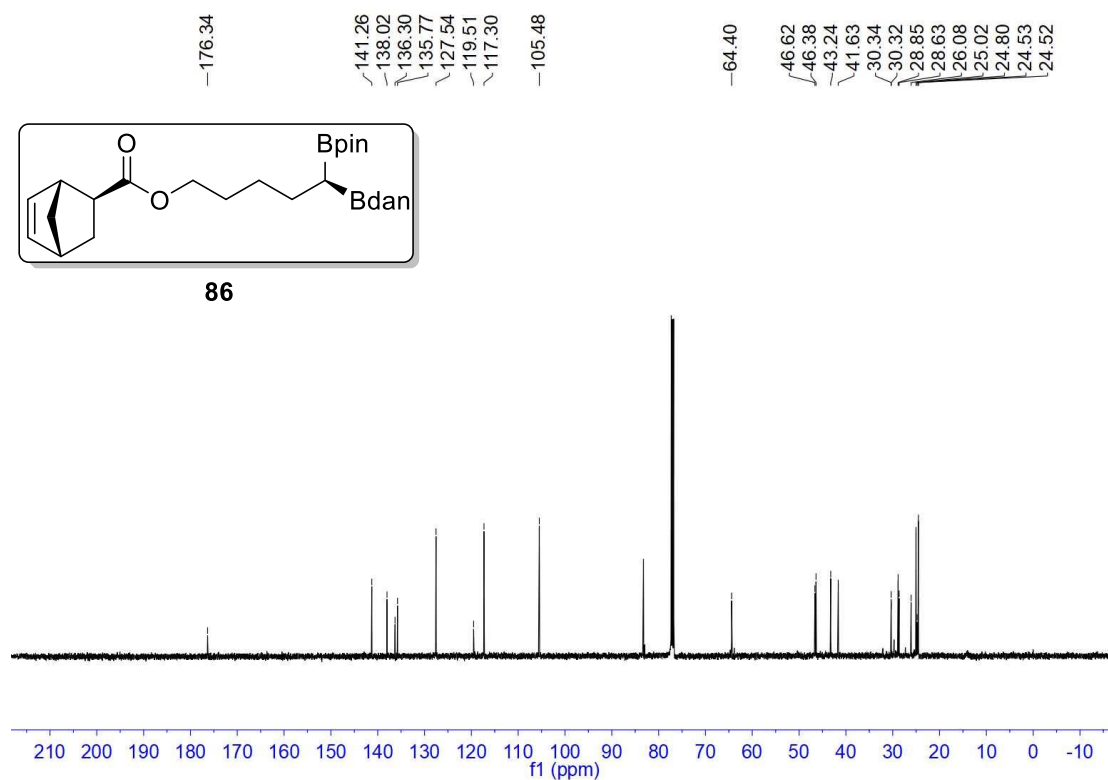

Supplementary Figure 269. <sup>13</sup>C NMR spectrum of compound 86

<sup>11</sup>B NMR (160 MHz, room temperature, CDCl<sub>3</sub>)

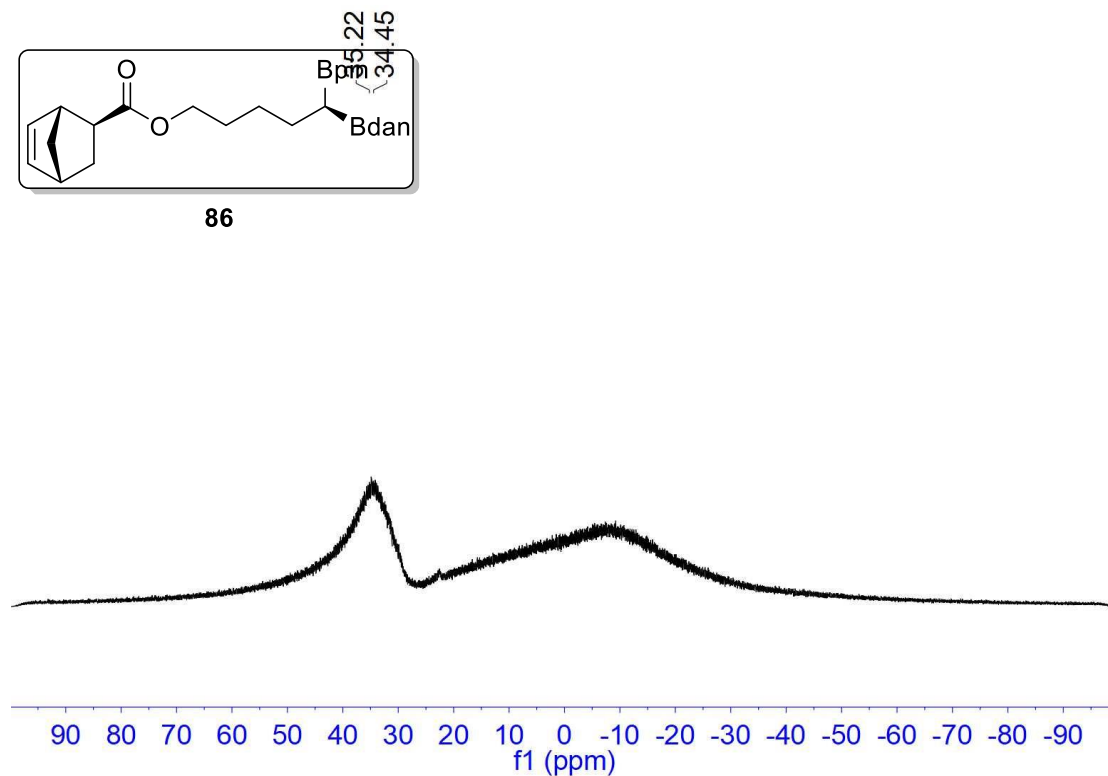

Supplementary Figure 270. <sup>11</sup>B NMR spectrum of compound 86

**(R)-2-(2-phenyl-1-(4,4,5,5-tetramethyl-1,3,2-dioxaborolan-2-yl)ethyl)-2,3-dihydro-1H-naphtho[1,8-de][1,3,2]diazaborinine (87<sup>a</sup>)**

<sup>1</sup>H NMR (500 MHz, room temperature, CDCl<sub>3</sub>)

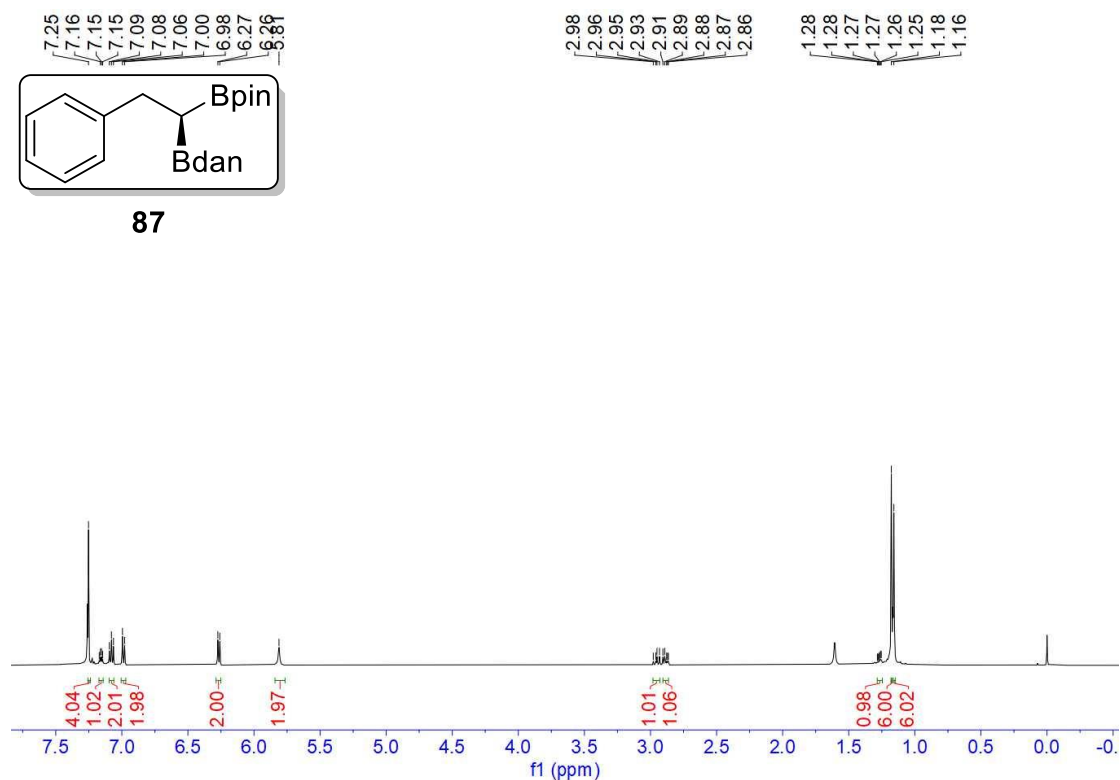

Supplementary Figure 271. <sup>1</sup>H NMR spectrum of compound 87<sup>a</sup>

<sup>13</sup>C NMR (126 MHz, room temperature, CDCl<sub>3</sub>)

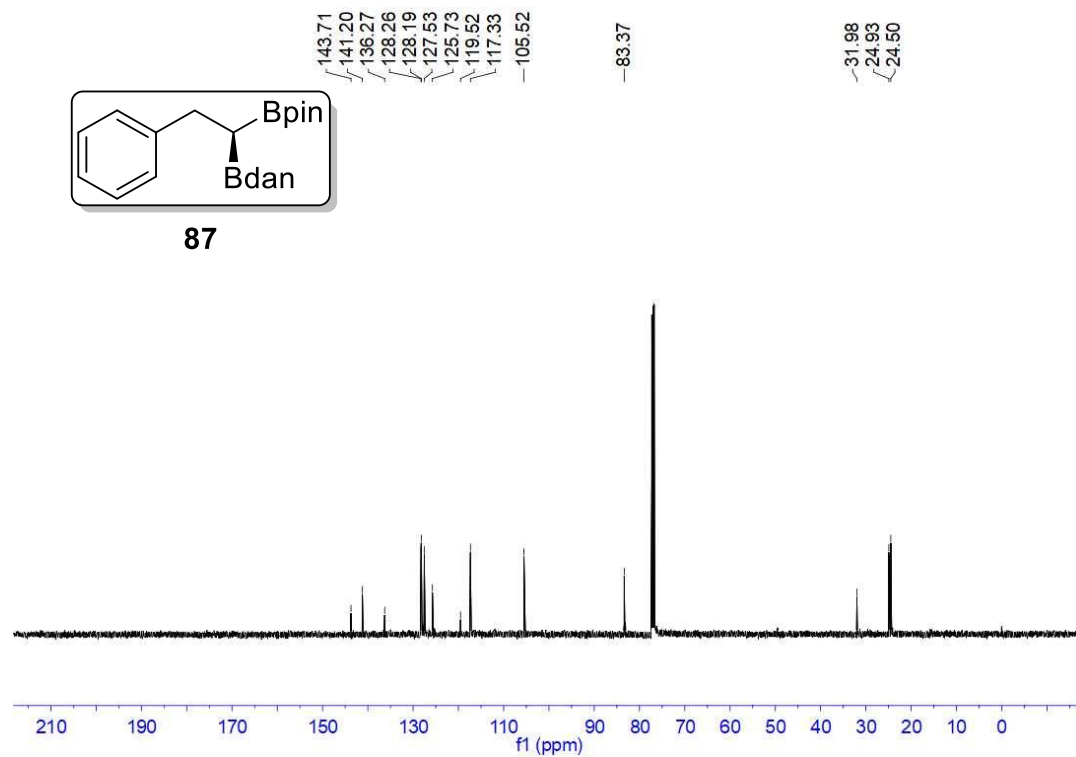

Supplementary Figure 272. <sup>13</sup>C NMR spectrum of compound 87<sup>a</sup>

$^{11}\text{B}$  NMR (160 MHz, room temperature,  $\text{CDCl}_3$ )

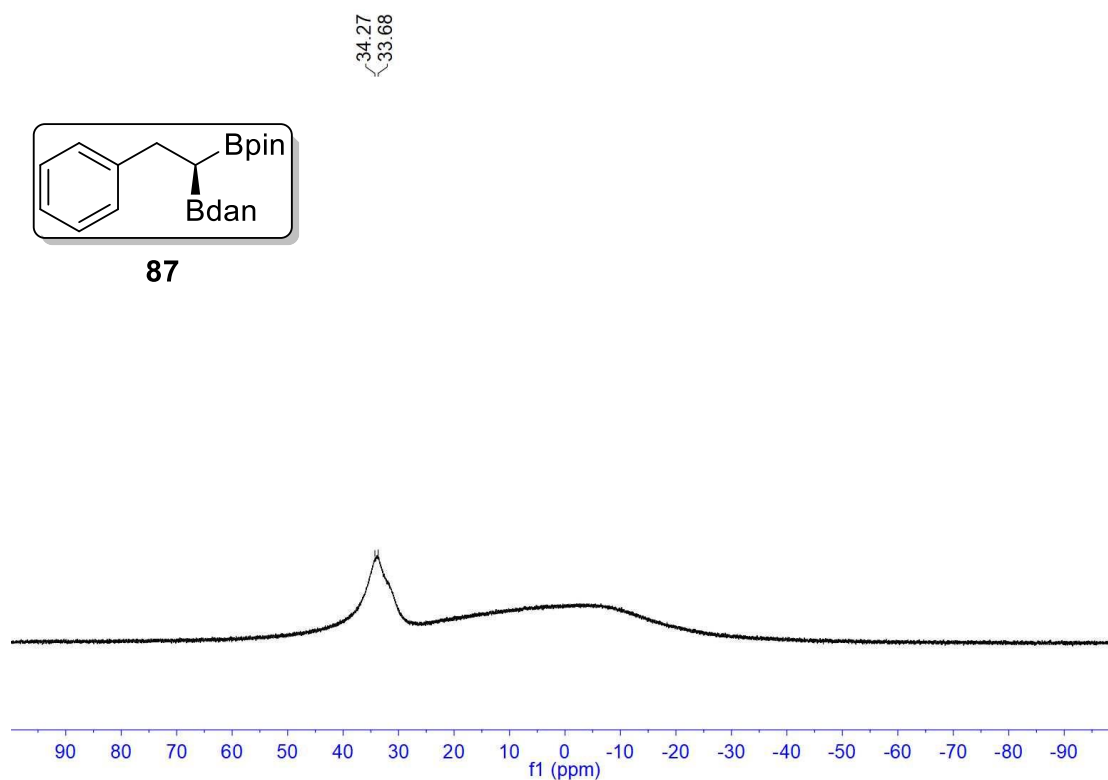

Supplementary Figure 273.  $^{11}\text{B}$  NMR spectrum of compound 87<sup>a</sup>

(S)-2-(2-phenyl-1-(4,4,5,5-tetramethyl-1,3,2-dioxaborolan-2-yl)ethyl)-2,3-dihydro-1H-naphtho[1,8-de][1,3,2]diazaborinine (87<sup>b</sup>)

$^1\text{H}$  NMR (500 MHz, room temperature,  $\text{CDCl}_3$ )

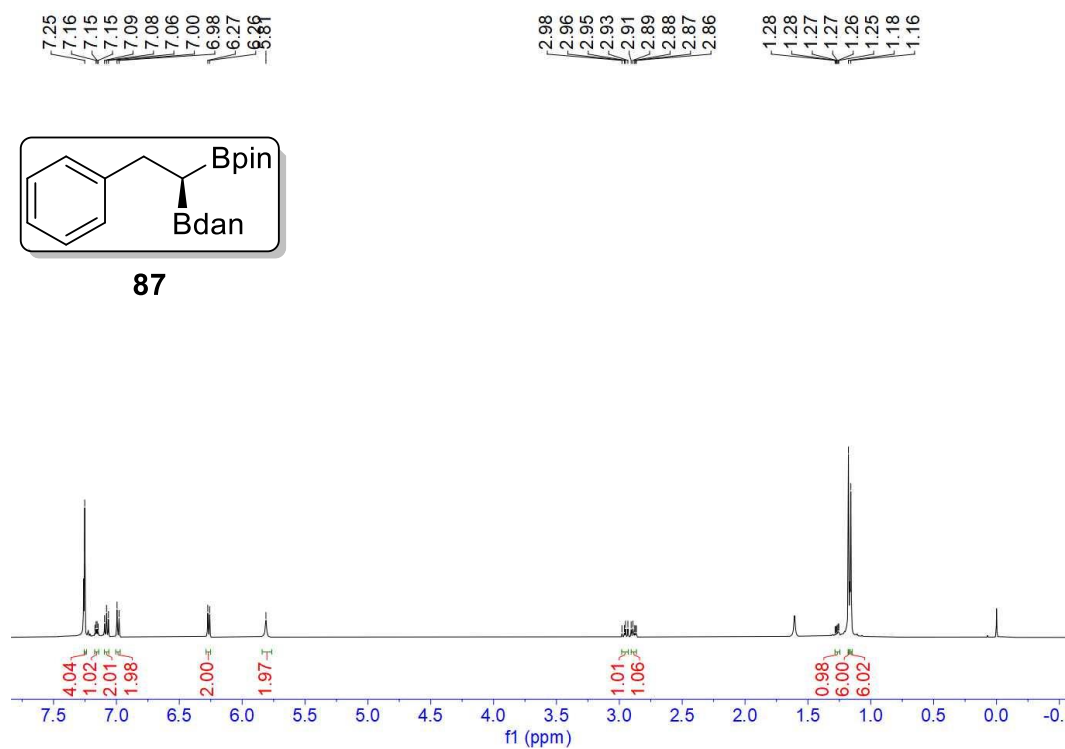

Supplementary Figure 274.  $^1\text{H}$  NMR spectrum of compound 87<sup>b</sup>

$^{13}\text{C}$  NMR (126 MHz, room temperature,  $\text{CDCl}_3$ )

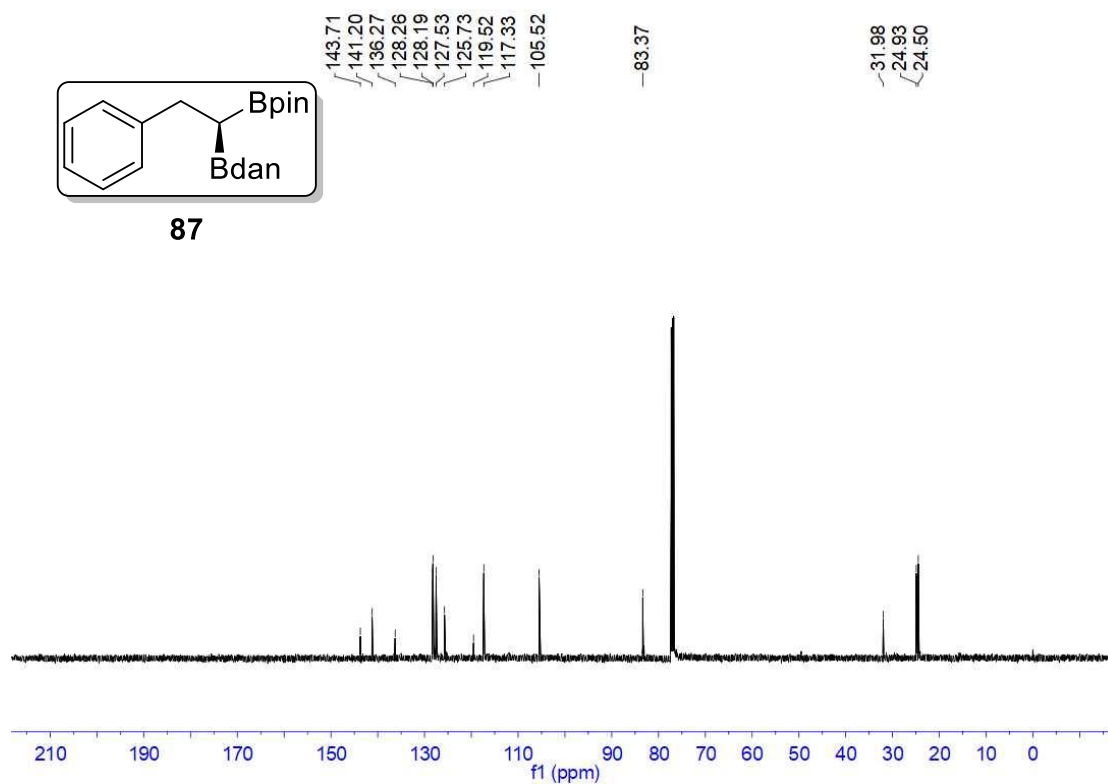

Supplementary Figure 275.  $^{13}\text{C}$  NMR spectrum of compound  $87^b$

$^{11}\text{B}$  NMR (160 MHz, room temperature,  $\text{CDCl}_3$ )

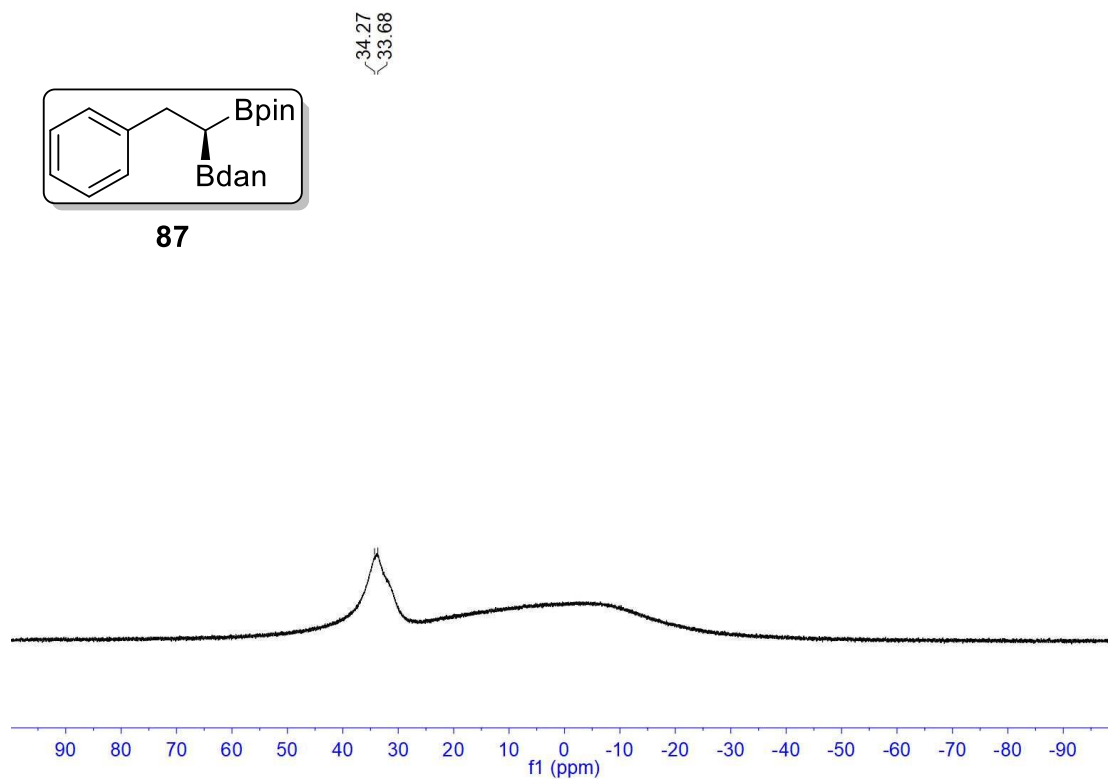

Supplementary Figure 276.  $^{11}\text{B}$  NMR spectrum of compound  $87^b$

(S)-2-(1-(4,4,5,5-tetramethyl-1,3,2-dioxaborolan-2-yl)-2-(p-tolyl)ethyl)-2,3-dihydro-1H-naphtho[1,8-de][1,3,2]diazaborinine (**88**)

<sup>1</sup>H NMR (500 MHz, room temperature, CDCl<sub>3</sub>)

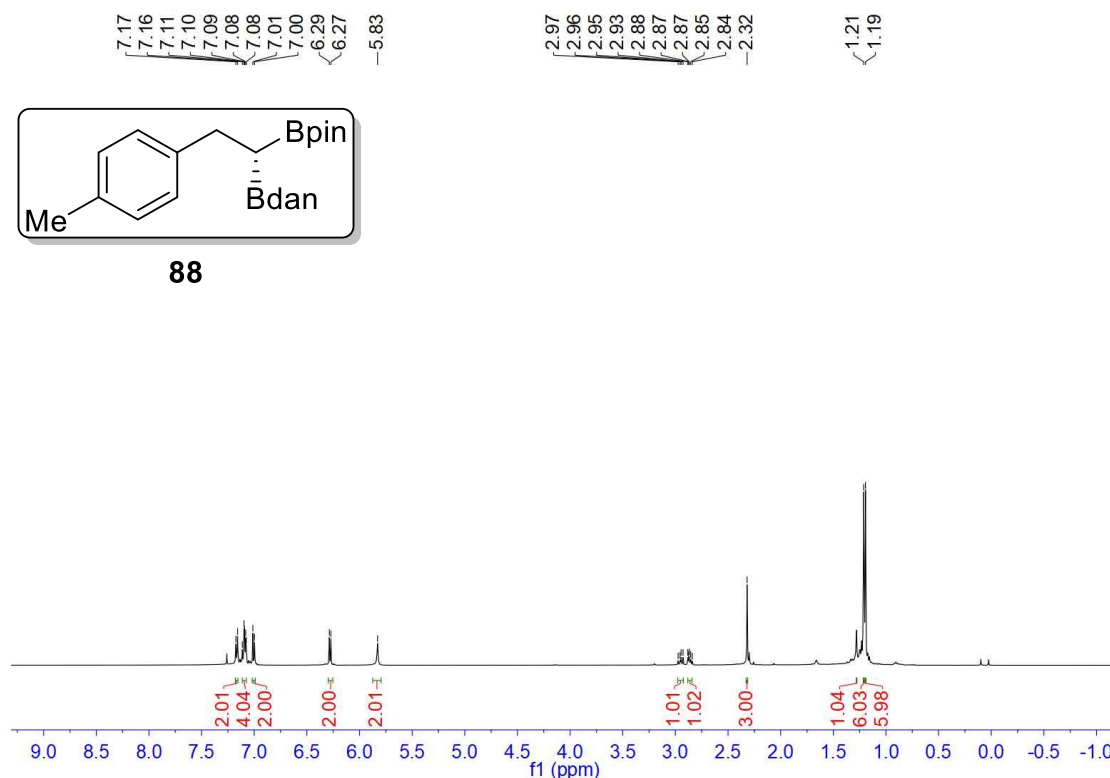

Supplementary Figure 277. <sup>1</sup>H NMR spectrum of compound **88**

<sup>13</sup>C NMR (126 MHz, room temperature, CDCl<sub>3</sub>)

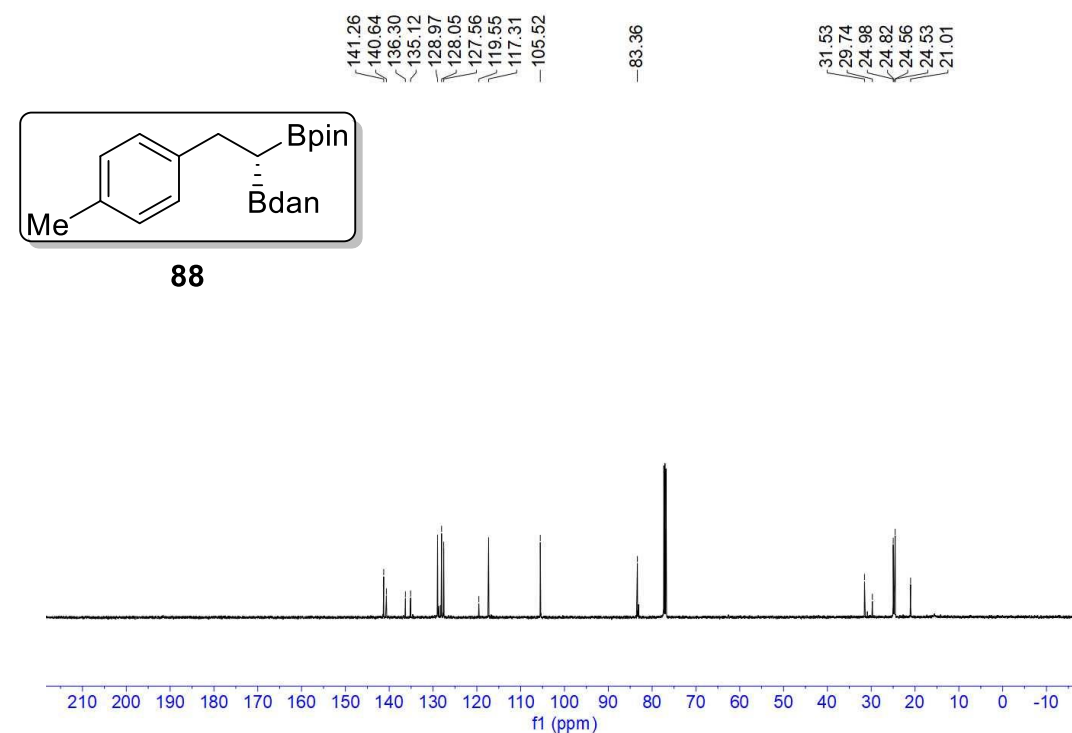

Supplementary Figure 278. <sup>13</sup>C NMR spectrum of compound **88**

$^{11}\text{B}$  NMR (160 MHz, room temperature,  $\text{CDCl}_3$ )

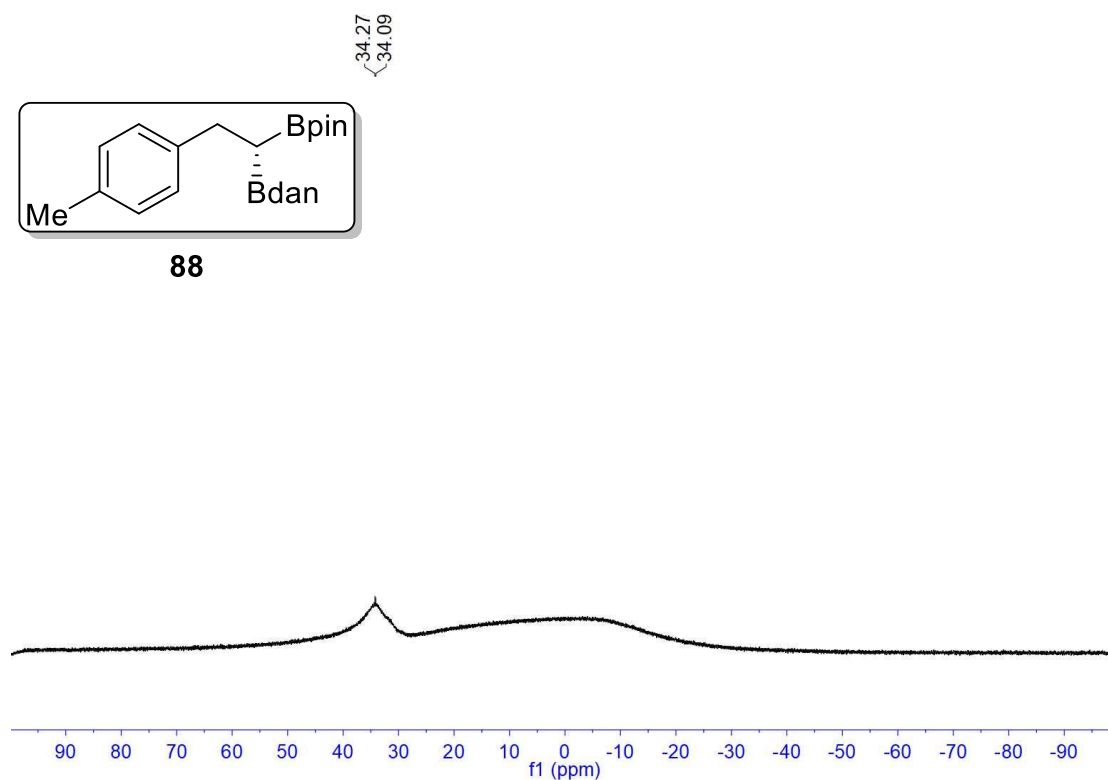

88

Supplementary Figure 279.  $^{11}\text{B}$  NMR spectrum of compound 88

(S)-2-(1-(4,4,5,5-tetramethyl-1,3,2-dioxaborolan-2-yl)-2-(m-tolyl)ethyl)-2,3-dihydro-1H-naphtho[1,8-de][1,3,2]diazaborinine (89)

$^1\text{H}$  NMR (500 MHz, room temperature,  $\text{CDCl}_3$ )

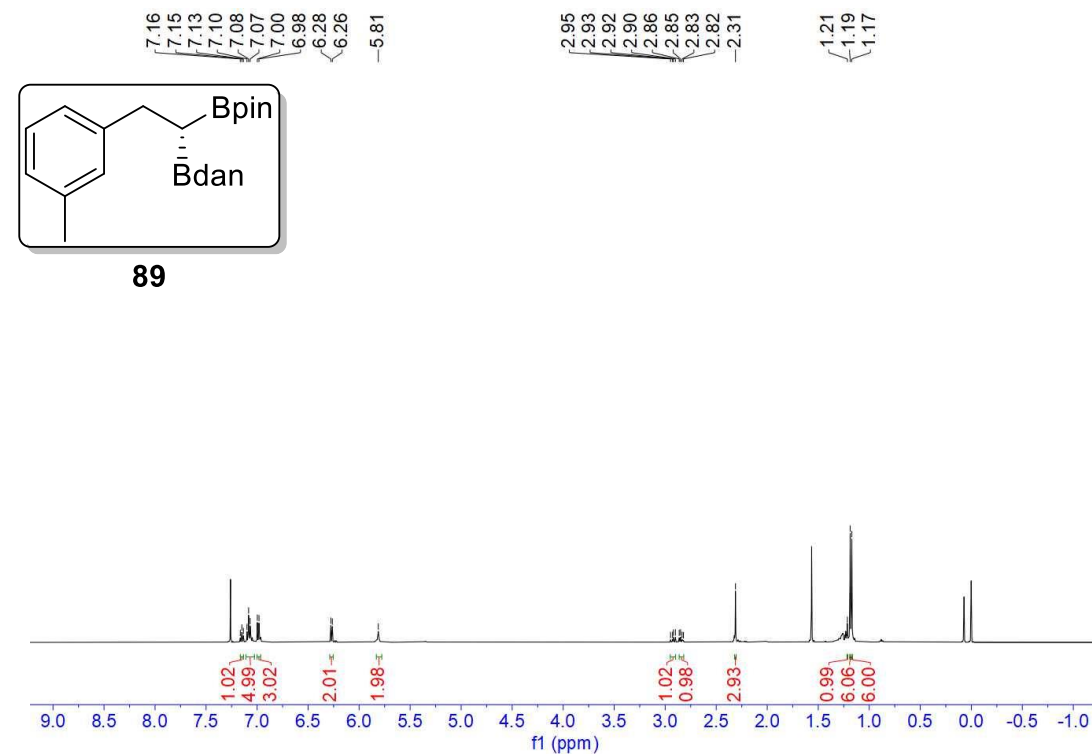

89

Supplementary Figure 280.  $^1\text{H}$  NMR spectrum of compound 89



$^{13}\text{C}$  NMR (126 MHz, room temperature,  $\text{CDCl}_3$ )

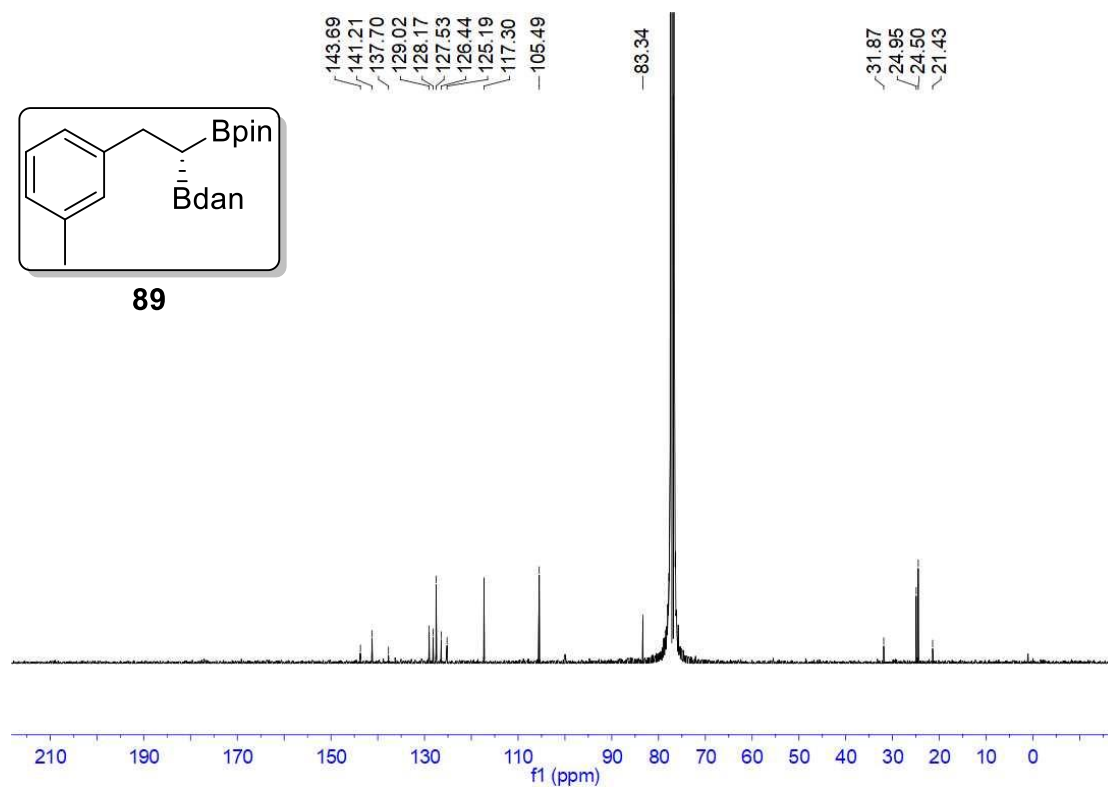

Supplementary Figure 281.  $^{13}\text{C}$  NMR spectrum of compound 89

$^{11}\text{B}$  NMR (160 MHz, room temperature,  $\text{CDCl}_3$ )

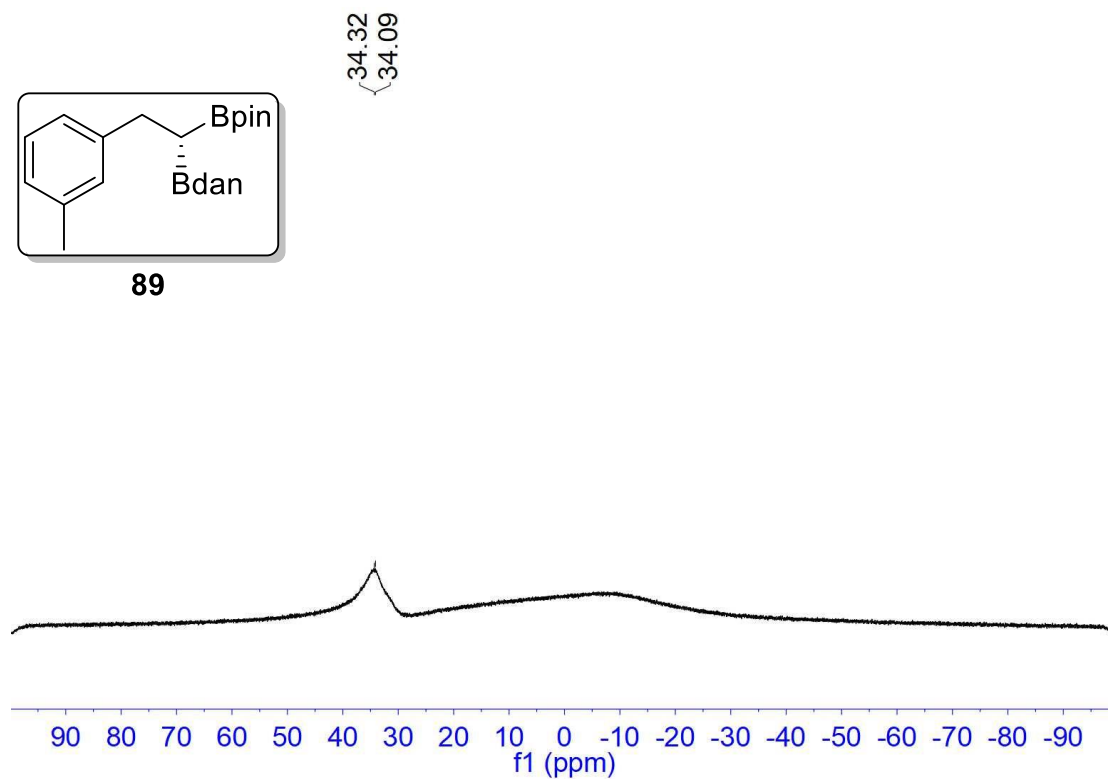

Supplementary Figure 282.  $^{11}\text{B}$  NMR spectrum of compound 89

(S)-2-(2-(4-ethylphenyl)-1-(4,4,5,5-tetramethyl-1,3,2-dioxaborolan-2-yl)ethyl)-2,3-dihydro-1H-naphtho[1,8-de][1,3,2]diazaborinine (90)

$^1\text{H}$  NMR (500 MHz, room temperature,  $\text{CDCl}_3$ )

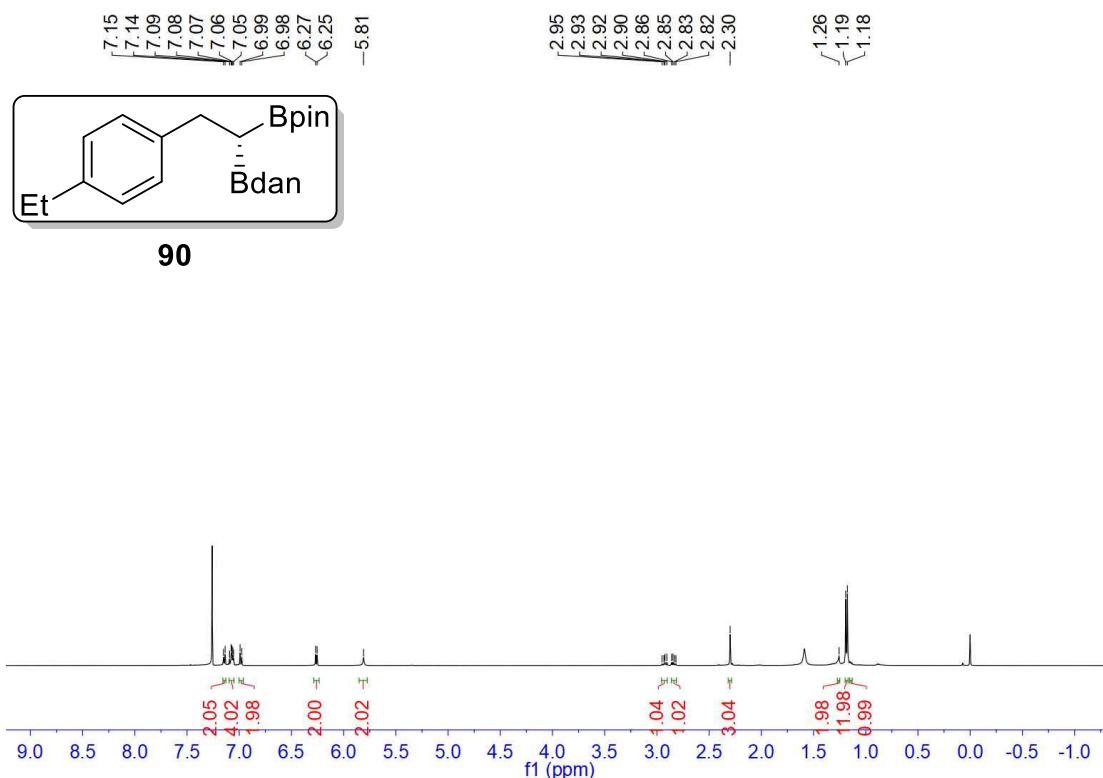

Supplementary Figure 283.  $^1\text{H}$  NMR spectrum of compound 90

$^{13}\text{C}$  NMR (126 MHz, room temperature,  $\text{CDCl}_3$ )

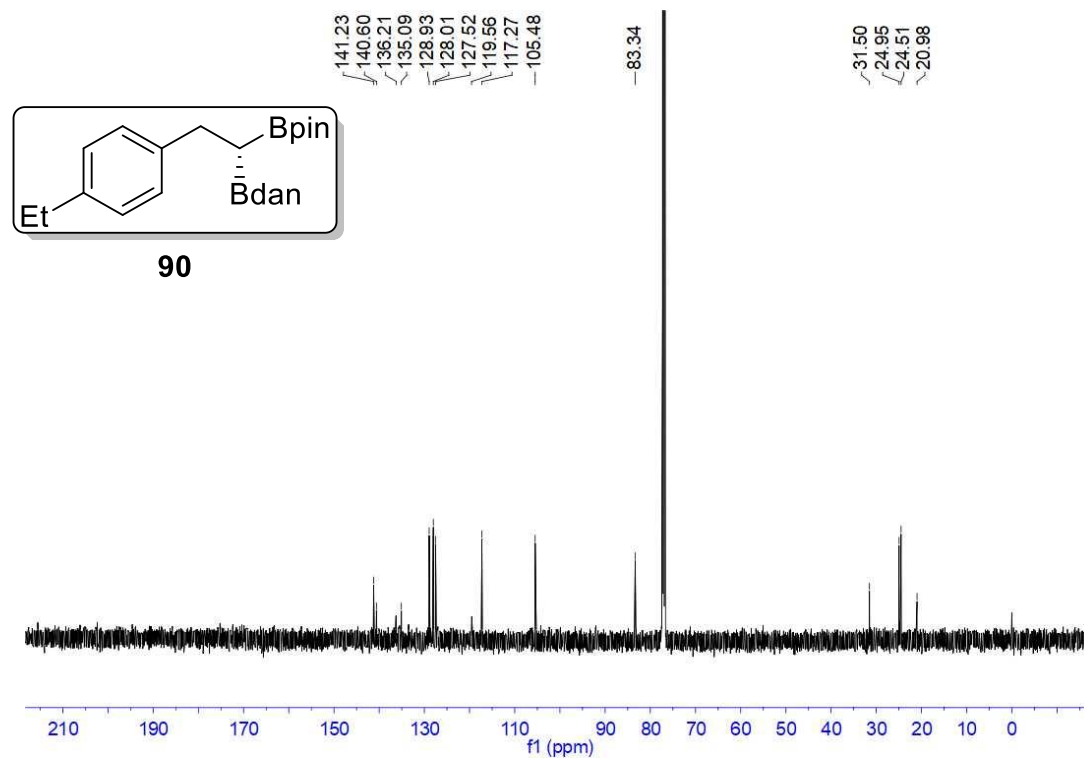

Supplementary Figure 284.  $^{13}\text{C}$  NMR spectrum of compound 90

$^{11}\text{B}$  NMR (160 MHz, room temperature,  $\text{CDCl}_3$ )

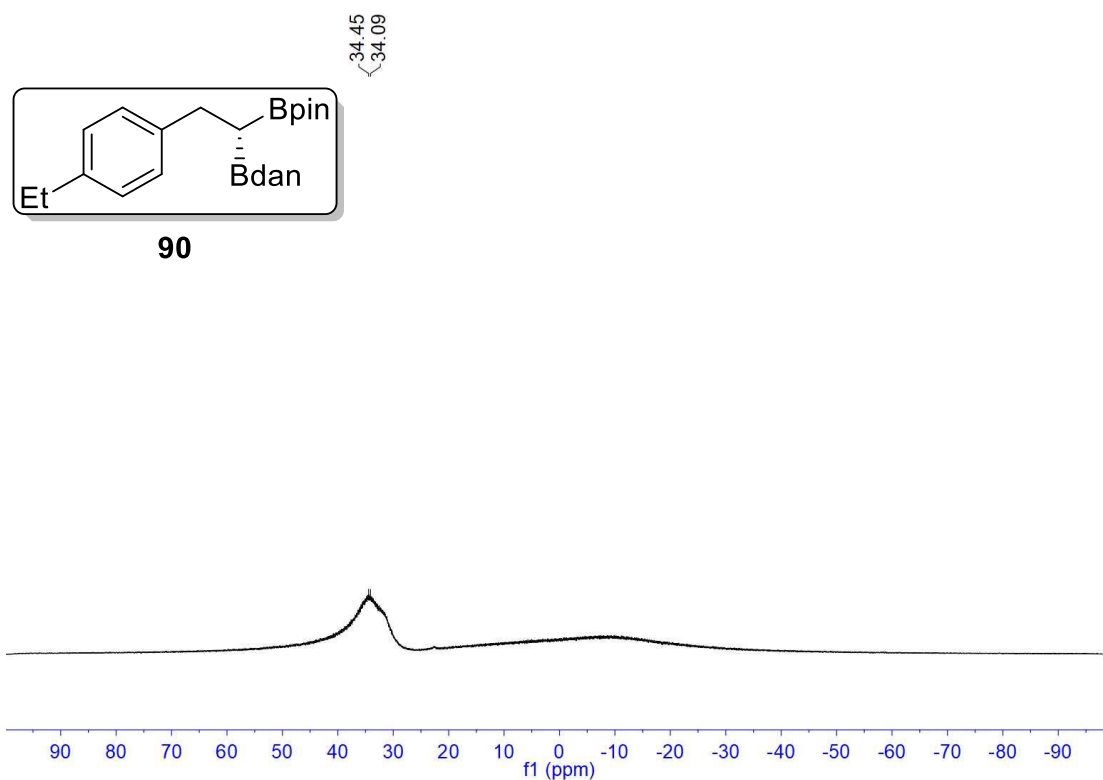

90

Supplementary Figure 285.  $^{11}\text{B}$  NMR spectrum of compound 90

(S)-2-(2-(4-propylphenyl)-1-(4,4,5,5-tetramethyl-1,3,2-dioxaborolan-2-yl)ethyl)-2,3-dihydro-1H-naphtho[1,8-de][1,3,2]diazaborinine (91)

$^1\text{H}$  NMR (500 MHz, room temperature,  $\text{CDCl}_3$ )

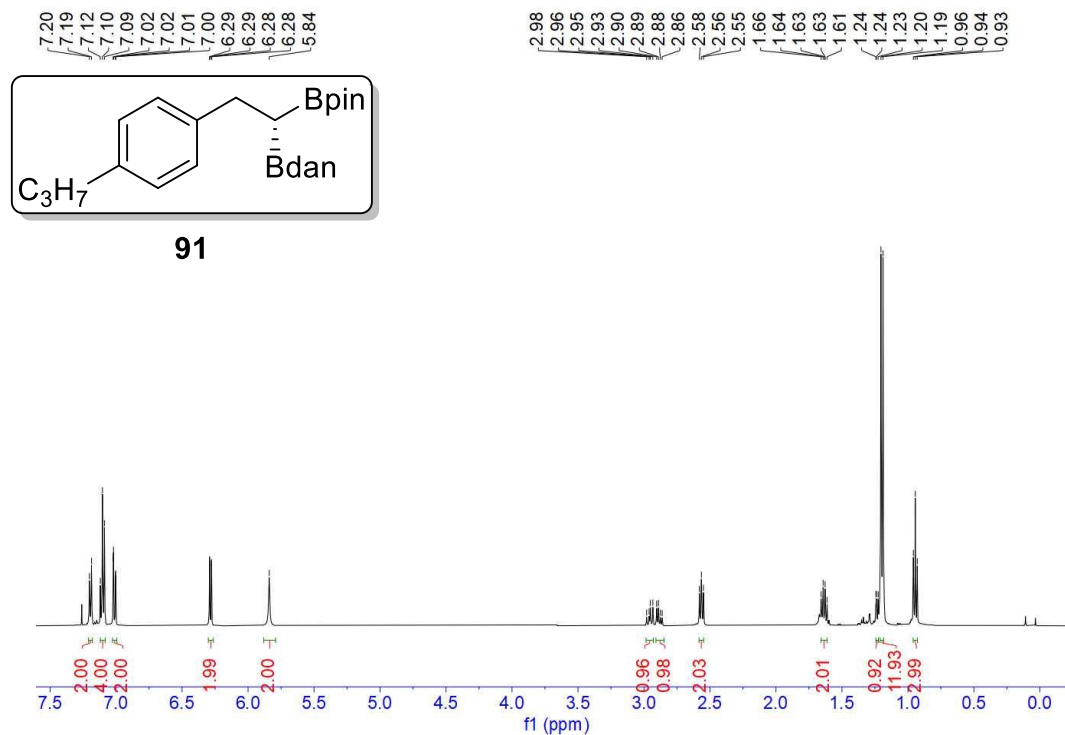

91

Supplementary Figure 286.  $^1\text{H}$  NMR spectrum of compound 91

<sup>13</sup>C NMR (126 MHz, room temperature, CDCl<sub>3</sub>)

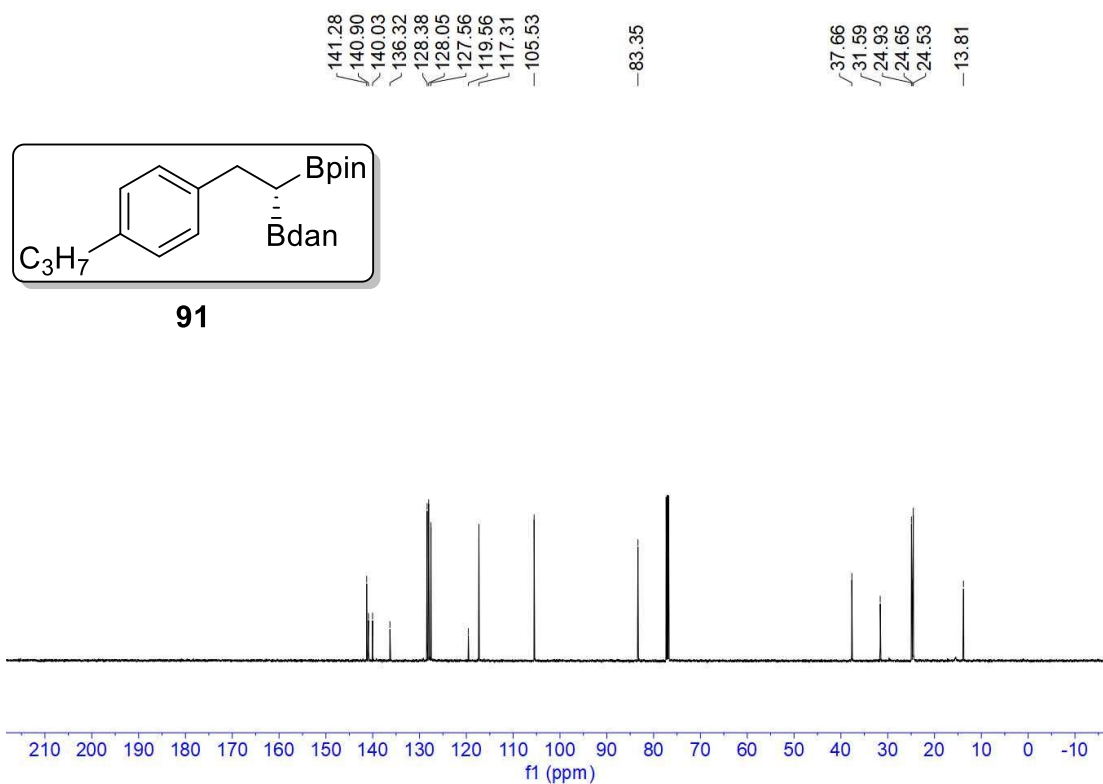

Supplementary Figure 287. <sup>13</sup>C NMR spectrum of compound 91

<sup>11</sup>B NMR (160 MHz, room temperature, CDCl<sub>3</sub>)

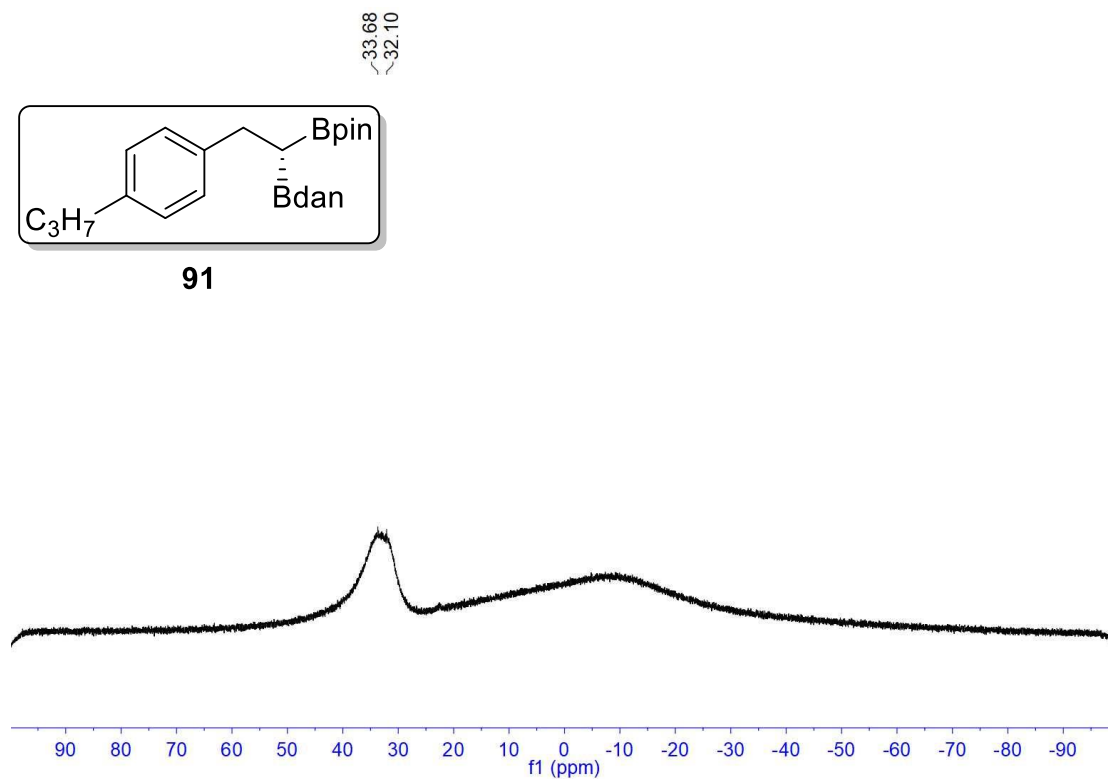

Supplementary Figure 288. <sup>11</sup>B NMR spectrum of compound 91

2-(4-phenylbutyl-1-d)-2,3-dihydro-1H-naphtho[1,8-de][1,3,2]diazaborinine (97)

<sup>1</sup>H NMR (500 MHz, room temperature, CDCl<sub>3</sub>)

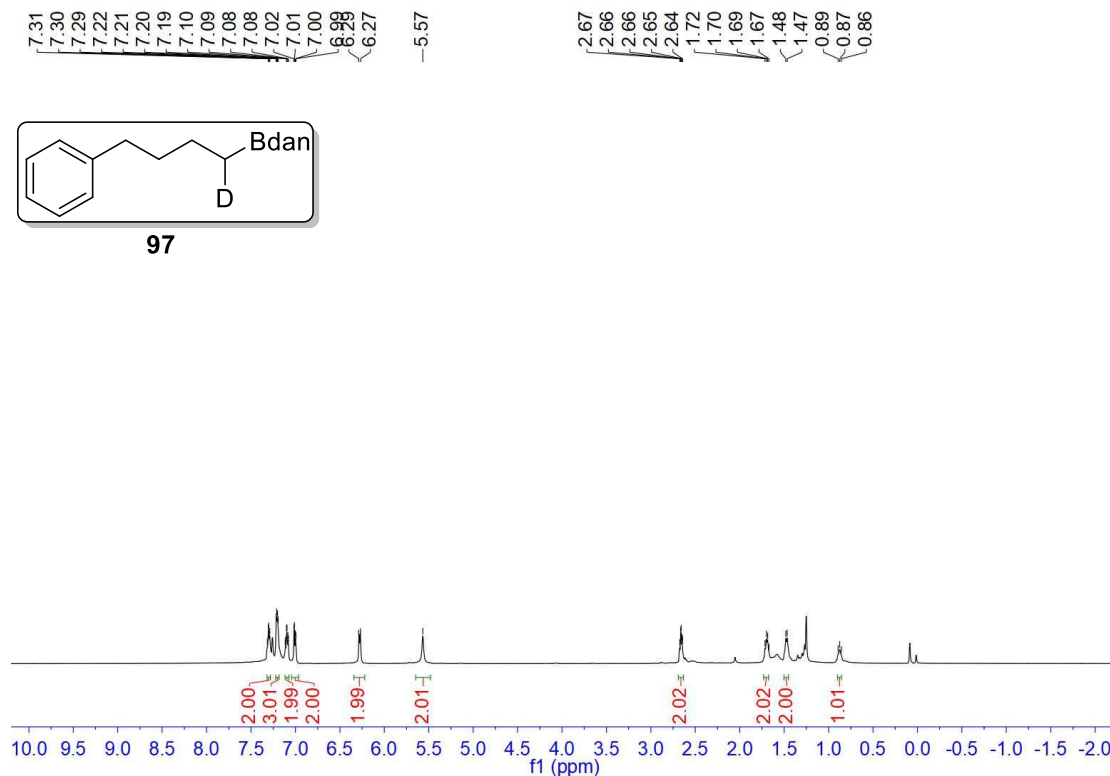

Supplementary Figure 289. <sup>1</sup>H NMR spectrum of compound 97

<sup>13</sup>C NMR (126 MHz, room temperature, CDCl<sub>3</sub>)

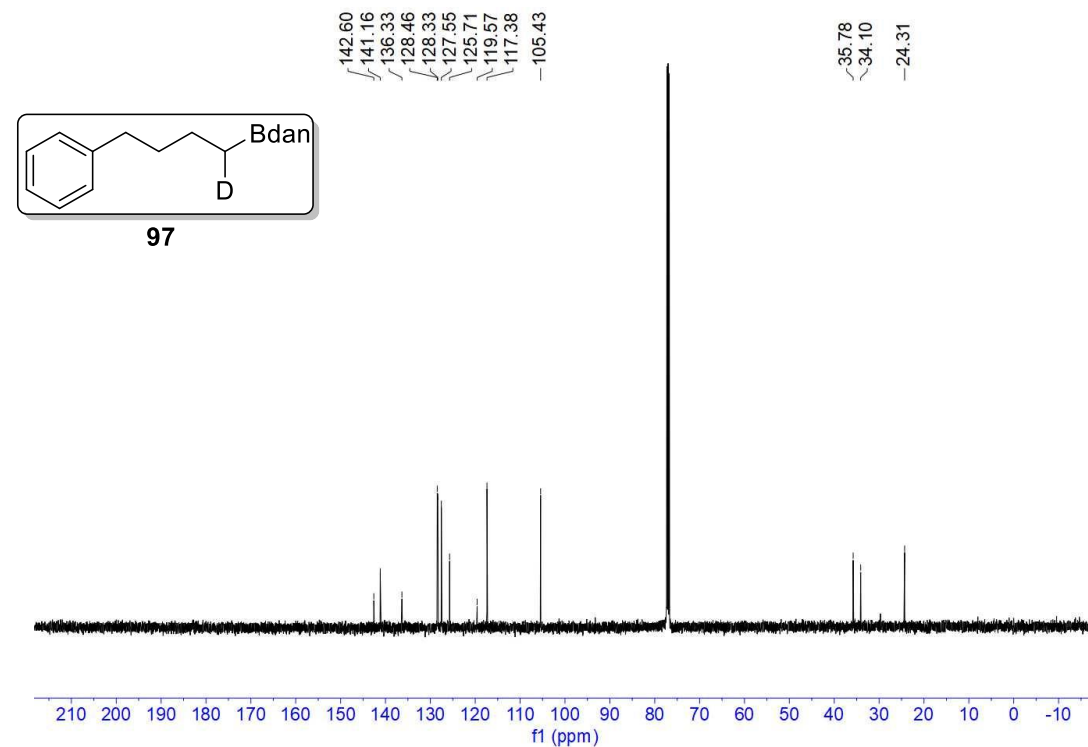

Supplementary Figure 290. <sup>13</sup>C NMR spectrum of compound 97

**$^{11}\text{B}$  NMR (160 MHz, room temperature,  $\text{CDCl}_3$ )**

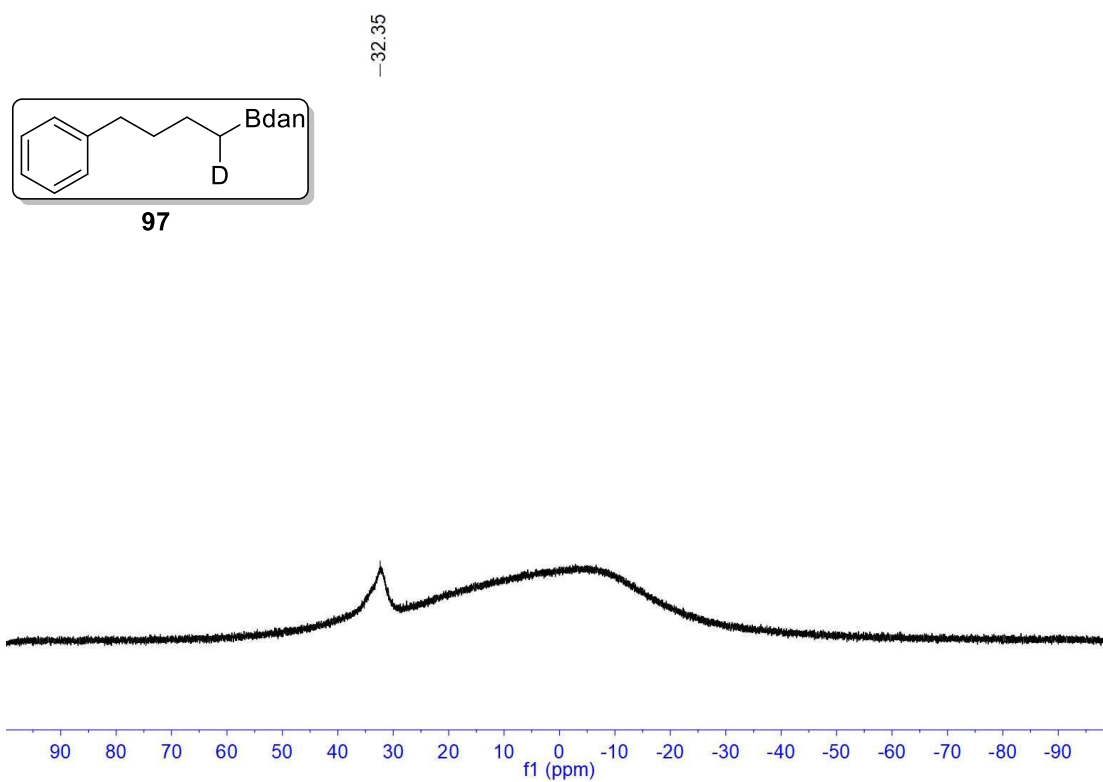

**Supplementary Figure 291.  $^{11}\text{B}$  NMR spectrum of compound 97**

## 4.2. Chiral HPLC charts

### 5-(1H-naphtho[1,8-de][1,3,2]diazaborinin-2(3H)-yl)-5-(4,4,5,5-tetramethyl-1,3,2-dioxaborolan-2-yl)pentyl (2R)-2-phenylpropanoate (25)

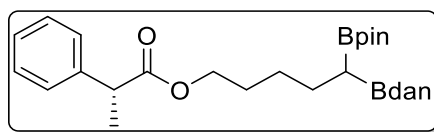

25

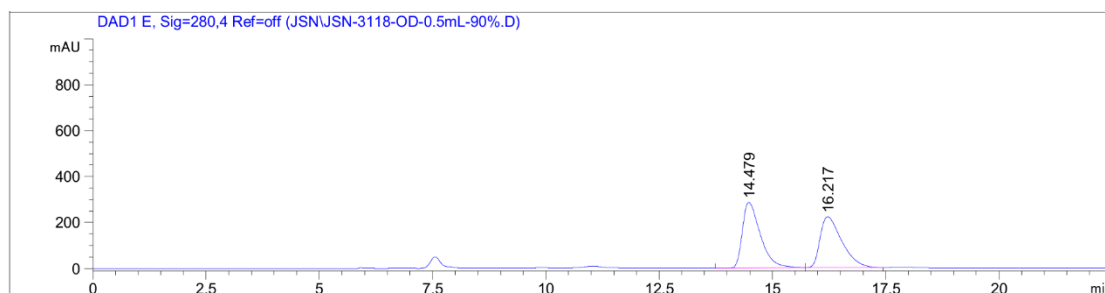

| Peak # | RetTime [min] | Type | Width [min] | Area [mAU*s] | Height [mAU] | Area %  |
|--------|---------------|------|-------------|--------------|--------------|---------|
| 1      | 14.479        | BV   | 0.4217      | 7917.75928   | 285.34573    | 51.6164 |
| 2      | 16.217        | VB   | 0.5039      | 7421.85010   | 222.10002    | 48.3836 |

Supplementary Figure 292. HPLC of compound rac-25

### 5-(1H-naphtho[1,8-de][1,3,2]diazaborinin-2(3H)-yl)-5-(4,4,5,5-tetramethyl-1,3,2-dioxaborolan-2-yl)pentyl (2S)-2-(4-isobutylphenyl)propanoate (27)

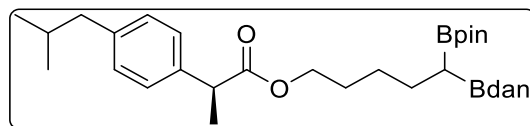

27

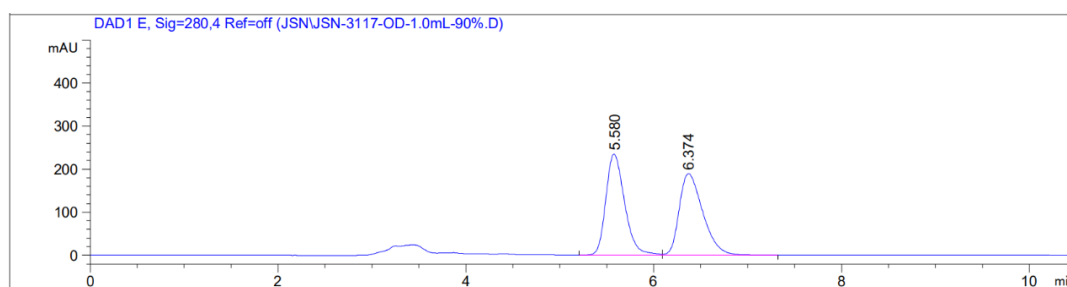

| Peak # | RetTime [min] | Type | Width [min] | Area [mAU*s] | Height [mAU] | Area %  |
|--------|---------------|------|-------------|--------------|--------------|---------|
| 1      | 5.580         | BV   | 0.2161      | 3261.42554   | 234.66853    | 49.7827 |
| 2      | 6.374         | VB   | 0.2671      | 3289.90015   | 188.98360    | 50.2173 |

Supplementary Figure 293. HPLC of compound rac-27

**5-(1H-naphtho[1,8-de][1,3,2]diazaborinin-2(3H)-yl)-5-(4,4,5,5-tetramethyl-1,3,2-dioxaborolan-2-yl)pentyl (1R,2S,4R)-bicyclo[2.2.1]hept-5-ene-2-carboxylate (29)**

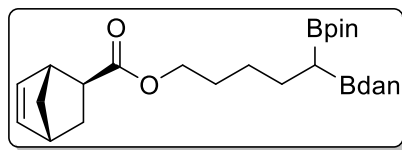

**29**

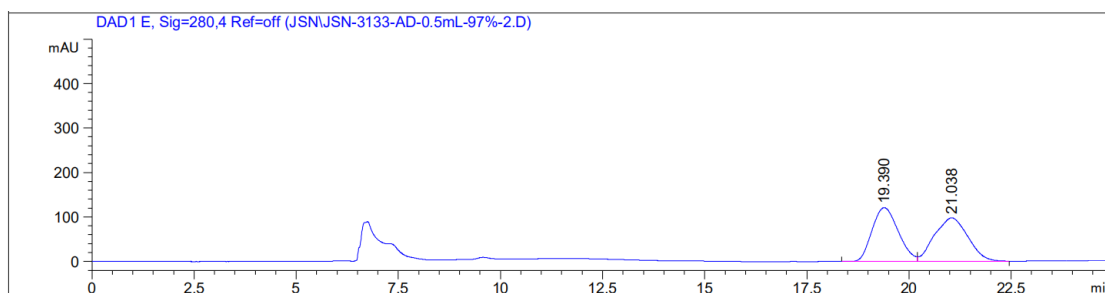

| Peak # | RetTime [min] | Type | Width [min] | Area [mAU*s] | Height [mAU] | Area %  |
|--------|---------------|------|-------------|--------------|--------------|---------|
| 1      | 19.390        | BV   | 0.6860      | 5390.60742   | 120.95336    | 49.4058 |
| 2      | 21.038        | VB   | 0.8115      | 5520.27441   | 97.65661     | 50.5942 |

**Supplementary Figure 294. HPLC of compound rac-29**

**5-(1H-naphtho[1,8-de][1,3,2]diazaborinin-2(3H)-yl)-5-(4,4,5,5-tetramethyl-1,3,2-dioxaborolan-2-yl)pentyl (2S)-2-(6-methoxynaphthalen-2-yl)propanoate (32)**

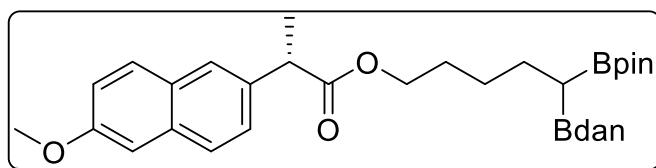

**32**

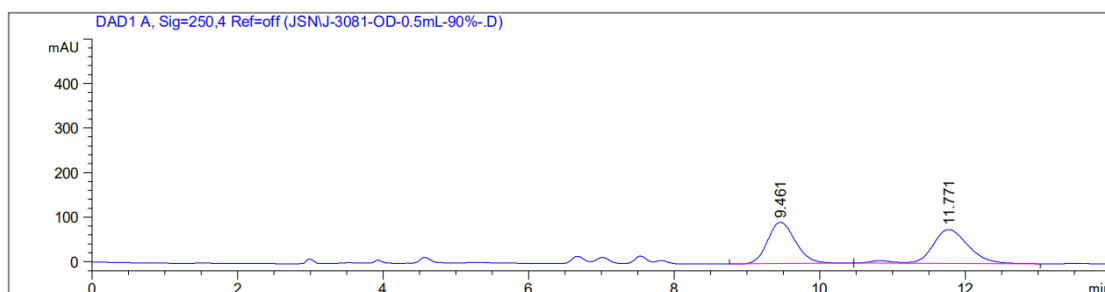

| Peak # | RetTime [min] | Type | Width [min] | Area [mAU*s] | Height [mAU] | Area % |
|--------|---------------|------|-------------|--------------|--------------|--------|
| 1      | 9.461         |      |             |              |              |        |
| 2      | 11.771        |      |             |              |              |        |



|   |        |      |        |            |          |         |
|---|--------|------|--------|------------|----------|---------|
| 1 | 9.461  | BB   | 0.4124 | 2476.59546 | 93.07779 | 48.3490 |
| 2 | 11.771 | VB R | 0.5116 | 2645.73657 | 76.08044 | 51.6510 |

Supplementary Figure 295. HPLC of compound rac-32

(R)-2-(4-phenyl-1-(4,4,5,5-tetramethyl-1,3,2-dioxaborolan-2-yl)butyl)-2,3-dihydro-1H-naphtho[1,8-de][1,3,2]diazaborinine (59)

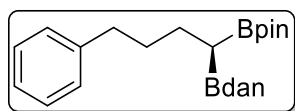

59

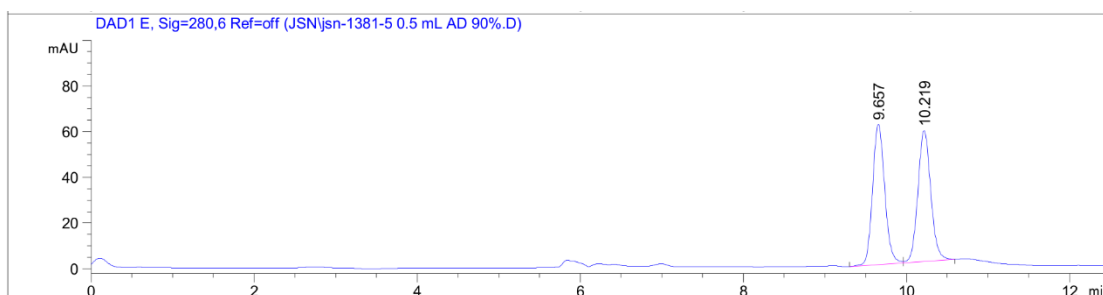

| Peak # | RetTime [min] | Type | Width [min] | Area [mAU*s] | Height [mAU] | Area % |
|--------|---------------|------|-------------|--------------|--------------|--------|
|--------|---------------|------|-------------|--------------|--------------|--------|

|   |        |    |        |           |          |         |
|---|--------|----|--------|-----------|----------|---------|
| 1 | 9.657  | BV | 0.1584 | 634.51373 | 61.46228 | 50.2326 |
| 2 | 10.219 | VB | 0.1701 | 628.63837 | 57.26398 | 49.7674 |

Supplementary Figure 296. HPLC of compound rac-59

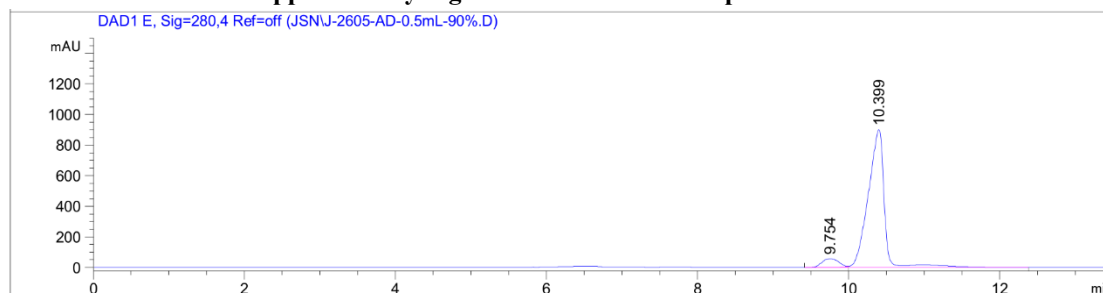

| Peak # | RetTime [min] | Type | Width [min] | Area [mAU*s] | Height [mAU] | Area % |
|--------|---------------|------|-------------|--------------|--------------|--------|
|--------|---------------|------|-------------|--------------|--------------|--------|

|   |        |      |        |           |           |         |
|---|--------|------|--------|-----------|-----------|---------|
| 1 | 9.754  | BV E | 0.2525 | 878.77509 | 56.79230  | 6.1422  |
| 2 | 10.399 | VV R | 0.2079 | 1.34284e4 | 900.02173 | 93.8578 |

Supplementary Figure 297. HPLC of compound (R)-59

(R)-2-(3-phenyl-1-(4,4,5,5-tetramethyl-1,3,2-dioxaborolan-2-yl)propyl)-2,3-dihydro-1H-naphtho[1,8-de][1,3,2]diazaborinine (60)

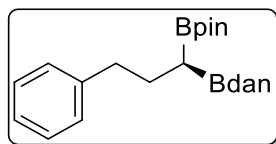

60

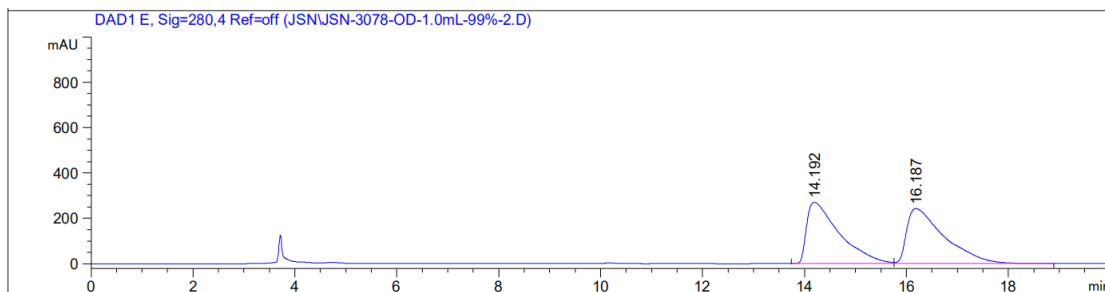

| Peak # | RetTime [min] | Type | Width [min] | Area [mAU*s] | Height [mAU] | Area %  |
|--------|---------------|------|-------------|--------------|--------------|---------|
| 1      | 14.192        | BV   | 0.6532      | 1.20894e4    | 270.63831    | 49.3313 |
| 2      | 16.187        | VB   | 0.7475      | 1.24172e4    | 242.46112    | 50.6687 |

Supplementary Figure 298. HPLC of compound rac-59

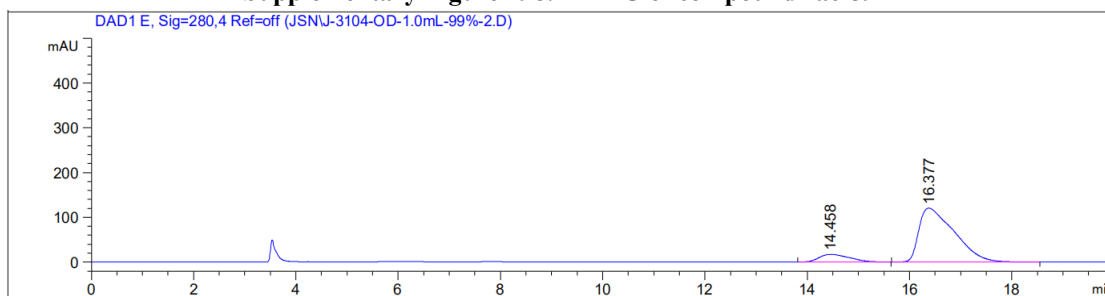

| Peak # | RetTime [min] | Type | Width [min] | Area [mAU*s] | Height [mAU] | Area %  |
|--------|---------------|------|-------------|--------------|--------------|---------|
| 1      | 14.458        | BB   | 0.5947      | 694.97015    | 17.00724     | 10.7639 |
| 2      | 16.377        | BB   | 0.6848      | 5761.53369   | 120.29792    | 89.2361 |

Supplementary Figure 299. HPLC of compound (R)-60

(R)-2-(2-cyclohexyl-1-(4,4,5,5-tetramethyl-1,3,2-dioxaborolan-2-yl)ethyl)-2,3-dihydro-1H-naphtho[1,8-de][1,3,2]diazaborinine (61)

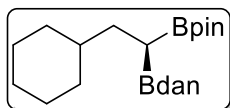

61

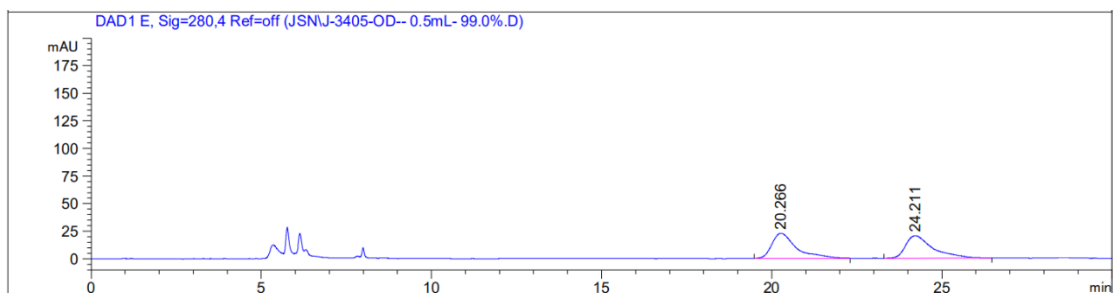

| Peak # | RetTime [min] | Type | Width [min] | Area [mAU*s] | Height [mAU] | Area %  |
|--------|---------------|------|-------------|--------------|--------------|---------|
| 1      | 20.266        | BB   | 0.6590      | 1131.40186   | 22.71955     | 49.8423 |
| 2      | 24.211        | BB   | 0.6948      | 1138.56152   | 20.47389     | 50.1577 |

**Supplementary Figure 300. HPLC of compound rac-61**

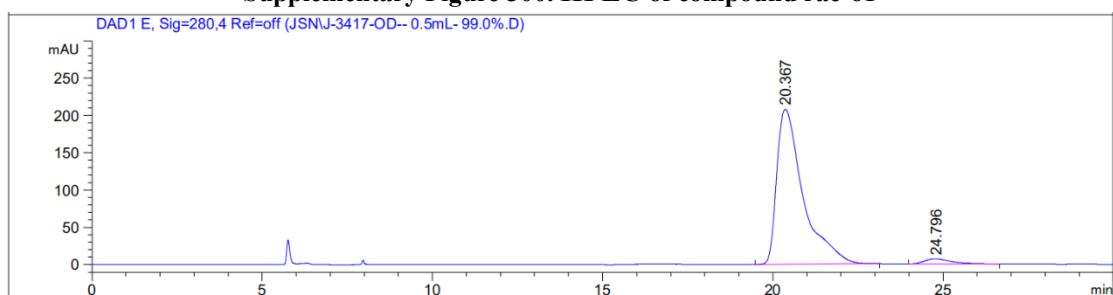

| Peak # | RetTime [min] | Type | Width [min] | Area [mAU*s] | Height [mAU] | Area %  |
|--------|---------------|------|-------------|--------------|--------------|---------|
| 1      | 20.367        | BB   | 0.7810      | 1.11588e4    | 207.63017    | 96.6070 |
| 2      | 24.796        | BB   | 0.6633      | 391.91779    | 7.04206      | 3.3930  |

**Supplementary Figure 301. HPLC of compound (R)-61**

**(R)-2-(2-cyclopentyl-1-(4,4,5,5-tetramethyl-1,3,2-dioxaborolan-2-yl)ethyl)-2,3-dihydro-1H-naphtho[1,8-de][1,3,2]diazaborinine (62)**

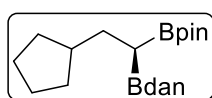

**62**

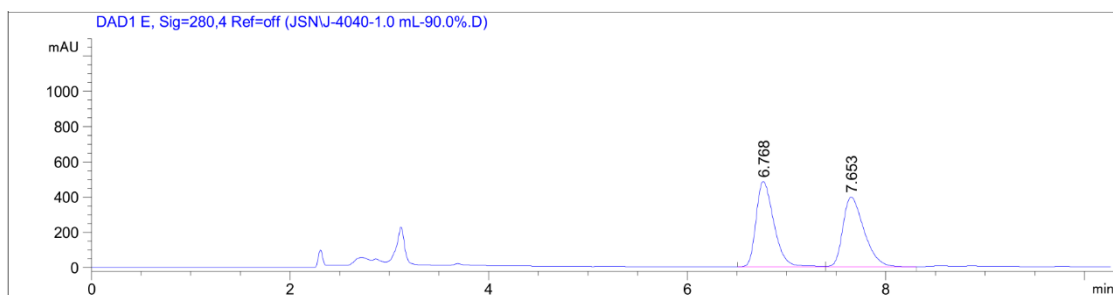

| Peak # | RetTime [min] | Type | Width [min] | Area [mAU*s] | Height [mAU] | Area % |
|--------|---------------|------|-------------|--------------|--------------|--------|
| 1      | 6.768         |      |             |              |              |        |
| 2      | 7.653         |      |             |              |              |        |

|   |       |    |        |            |           |         |
|---|-------|----|--------|------------|-----------|---------|
| 1 | 6.768 | BV | 0.1905 | 5982.47119 | 483.11530 | 50.6590 |
| 2 | 7.653 | VB | 0.2259 | 5826.82031 | 395.34924 | 49.3410 |

**Supplementary Figure 302. HPLC of compound rac-62**

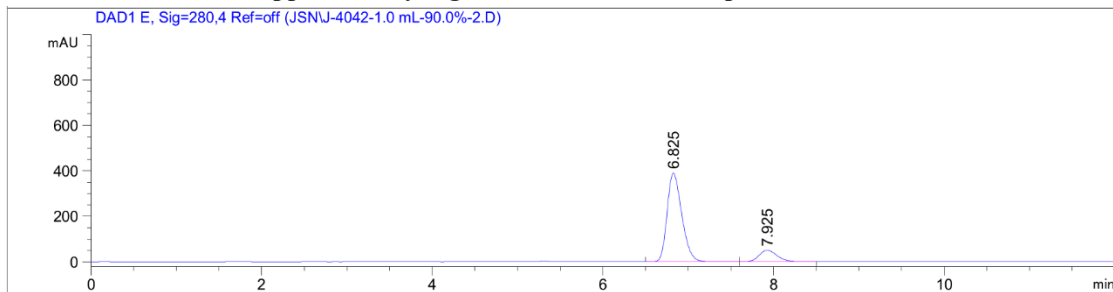

| Peak # | RetTime [min] | Type | Width [min] | Area [mAU*s] | Height [mAU] | Area %  |
|--------|---------------|------|-------------|--------------|--------------|---------|
| 1      | 6.825         | BB   | 0.1853      | 4650.33105   | 389.37024    | 86.3160 |
| 2      | 7.925         | BB   | 0.2291      | 737.23468    | 50.26014     | 13.6840 |

**Supplementary Figure 303. HPLC of compound (R)-62**

**(R)-2-(2-cyclopropyl-1-(4,4,5,5-tetramethyl-1,3,2-dioxaborolan-2-yl)ethyl)-2,3-dihydro-1H-naphtho[1,8-de][1,3,2]diazaborinine (63)**

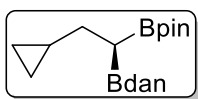

**63**

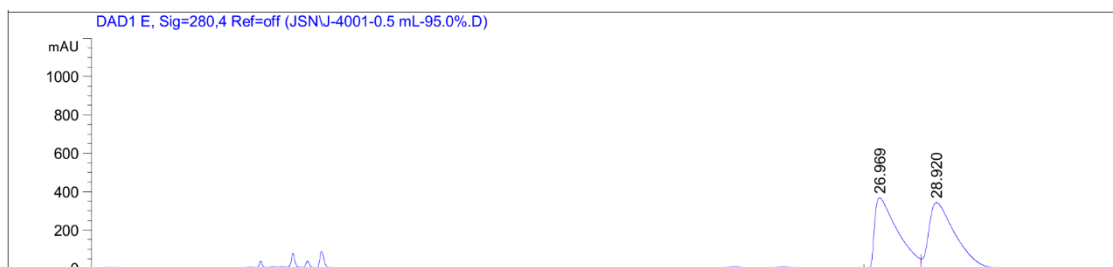

| Peak # | RetTime [min] | Type | Width [min] | Area [mAU*s] | Height [mAU] | Area %  |
|--------|---------------|------|-------------|--------------|--------------|---------|
| 1      | 26.969        | BV   | 0.7811      | 2.03004e4    | 369.41107    | 48.2878 |
| 2      | 28.920        | VB   | 0.9216      | 2.17400e4    | 344.77774    | 51.7122 |

**Supplementary Figure 304. HPLC of compound rac-63**

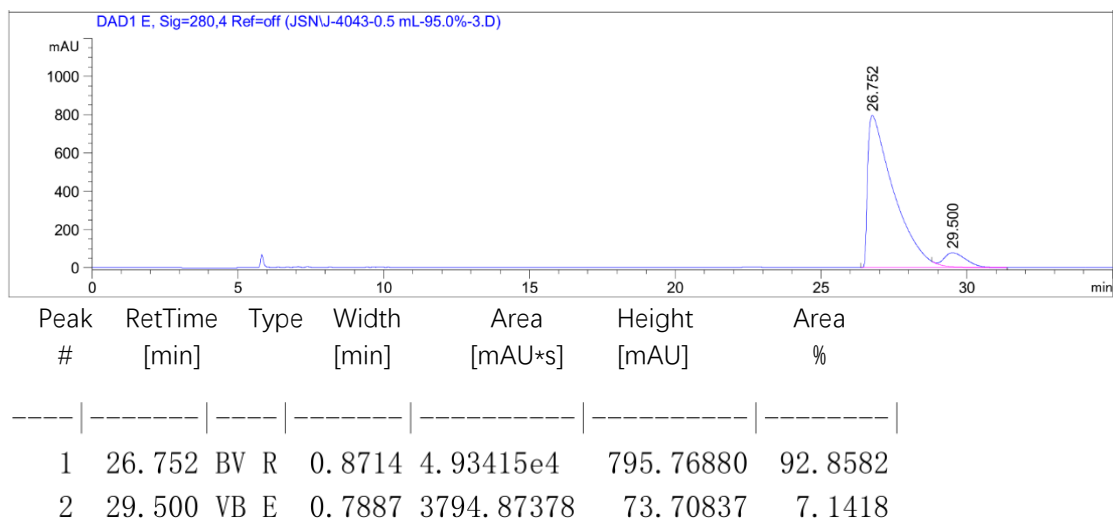

Supplementary Figure 305. HPLC of compound (R)-63

(R)-2-(3,3-dimethyl-1-(4,4,5,5-tetramethyl-1,3,2-dioxaborolan-2-yl)butyl)-2,3-dihydro-1H-naphtho[1,8-de][1,3,2]diazaborinine (64)

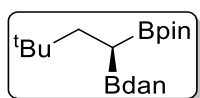

64

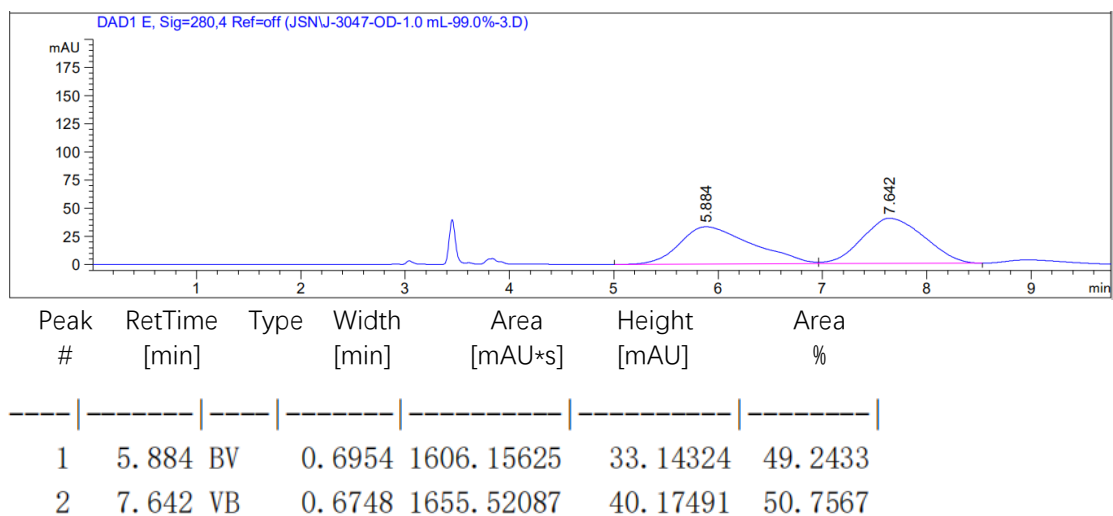

Supplementary Figure 306. HPLC of compound rac-64

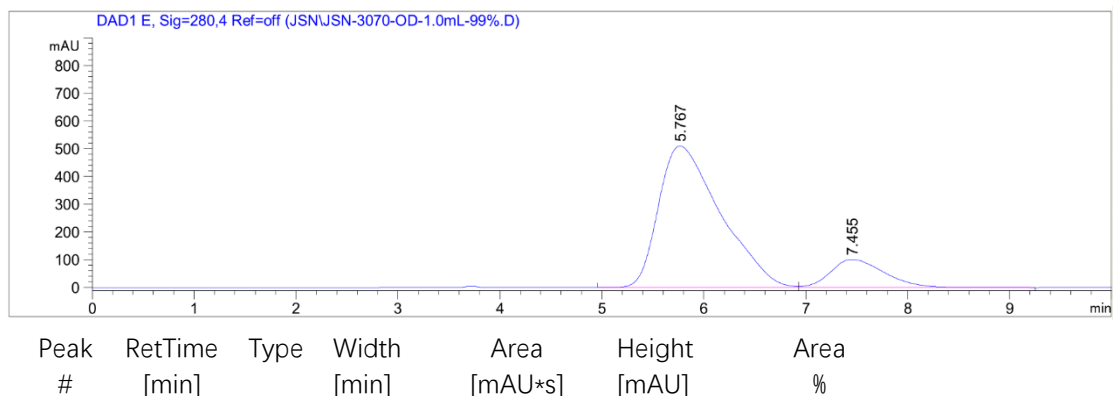

|   |       |    |        |            |           |         |
|---|-------|----|--------|------------|-----------|---------|
| 1 | 5.767 | BV | 0.6388 | 2.14327e4  | 509.44110 | 85.2609 |
| 2 | 7.455 | VB | 0.5604 | 3705.09912 | 101.37244 | 14.7391 |

Supplementary Figure 307. HPLC of compound (R)-64

(R)-2-(1-(4,4,5,5-tetramethyl-1,3,2-dioxaborolan-2-yl)pentyl)-2,3-dihydro-1H-naphtho[1,8-de][1,3,2]diazaborinine (65)

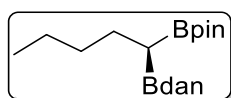

65

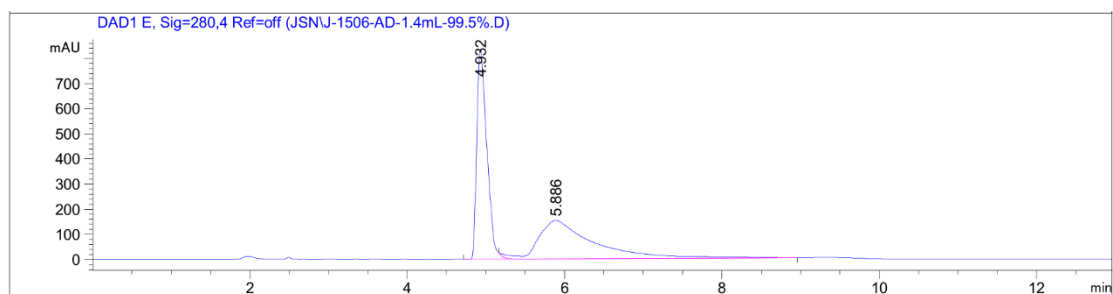

| Peak # | RetTime [min] | Type | Width [min] | Area [mAU*s] | Height [mAU] | Area % |
|--------|---------------|------|-------------|--------------|--------------|--------|
|--------|---------------|------|-------------|--------------|--------------|--------|

|   |       |      |        |            |           |         |
|---|-------|------|--------|------------|-----------|---------|
| 1 | 4.932 | BV R | 0.1340 | 7444.99023 | 835.30438 | 49.5970 |
| 2 | 5.886 | VB E | 0.6997 | 7565.97461 | 153.32700 | 50.4030 |

Supplementary Figure 308. HPLC of compound rac-65

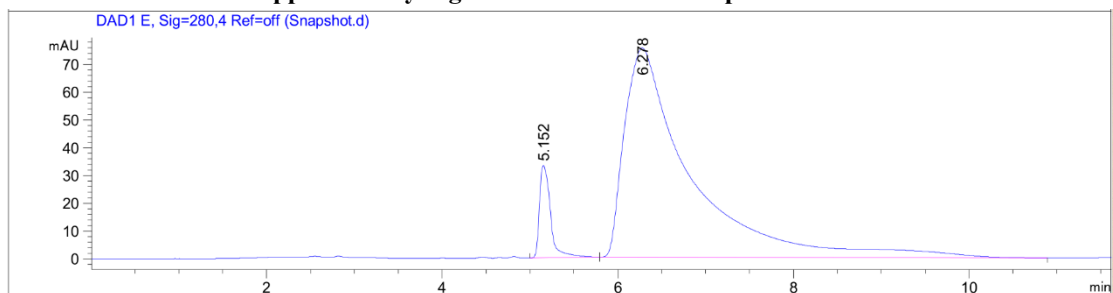

| Peak # | RetTime [min] | Type | Width [min] | Area [mAU*s] | Height [mAU] | Area % |
|--------|---------------|------|-------------|--------------|--------------|--------|
|--------|---------------|------|-------------|--------------|--------------|--------|

|   |       |    |        |            |          |         |
|---|-------|----|--------|------------|----------|---------|
| 1 | 5.152 | BB | 0.1397 | 290.87671  | 33.37503 | 6.8202  |
| 2 | 6.278 | BB | 0.7386 | 3974.03784 | 75.43893 | 93.1798 |

Supplementary Figure 309. HPLC of compound (R)-65

**(R)-2-(1-(4,4,5,5-tetramethyl-1,3,2-dioxaborolan-2-yl)hexyl)-2,3-dihydro-1H-naphtho[1,8-de][1,3,2]diazaborinine (66)**

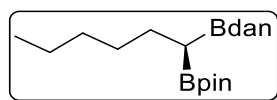

**66**

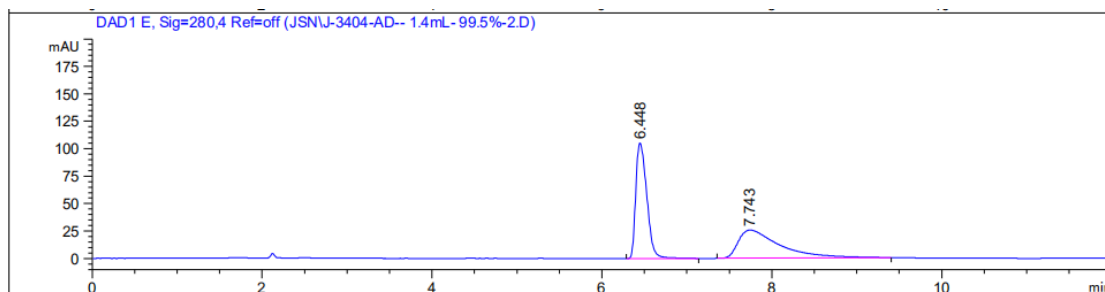

| Peak # | RetTime [min] | Type | Width [min] | Area [mAU*s] | Height [mAU] | Area %  |
|--------|---------------|------|-------------|--------------|--------------|---------|
| 1      | 6.448         | BB   | 0.1454      | 949.18066    | 105.08267    | 51.9872 |
| 2      | 7.743         | BB   | 0.4763      | 876.61676    | 25.67881     | 48.0128 |

**Supplementary Figure 310. HPLC of compound rac-66**

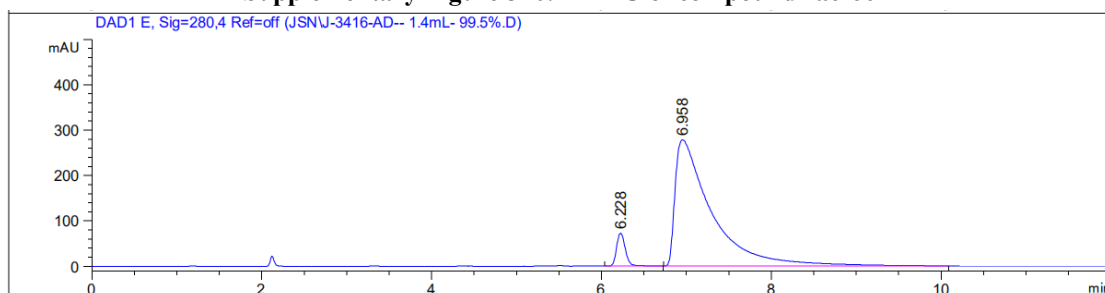

| Peak # | RetTime [min] | Type | Width [min] | Area [mAU*s] | Height [mAU] | Area %  |
|--------|---------------|------|-------------|--------------|--------------|---------|
| 1      | 6.228         | BB   | 0.1139      | 521.11084    | 72.43766     | 5.9008  |
| 2      | 6.958         | BB   | 0.4184      | 8310.04102   | 278.30270    | 94.0992 |

**Supplementary Figure 311. HPLC of compound (R)-66**

**(R)-2-(1-(4,4,5,5-tetramethyl-1,3,2-dioxaborolan-2-yl)heptyl)-2,3-dihydro-1H-naphtho[1,8-de][1,3,2]diazaborinine (67)**

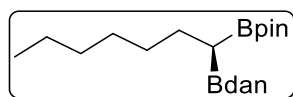

**67**

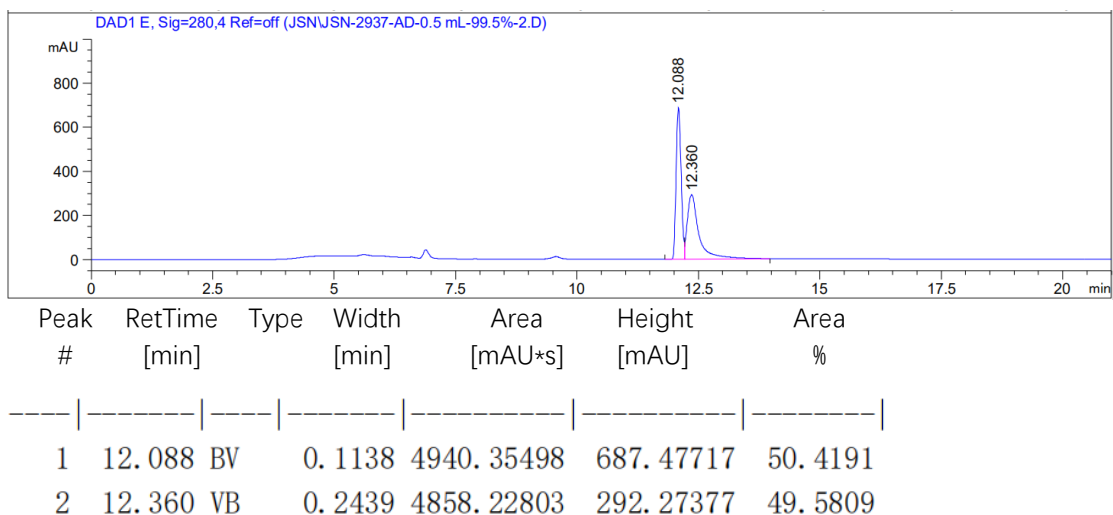

Supplementary Figure 312. HPLC of compound rac-67

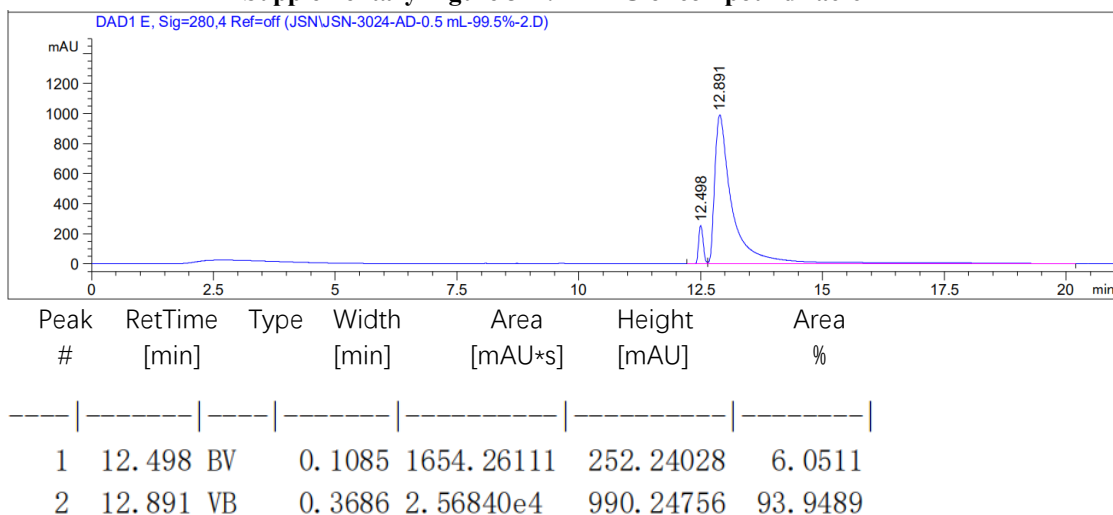

Supplementary Figure 313. HPLC of compound (R)-67

(R)-2-(1-(4,4,5,5-tetramethyl-1,3,2-dioxaborolan-2-yl)octyl)-2,3-dihydro-1H-naphtho[1,8-de][1,3,2]diazaborinine (68)

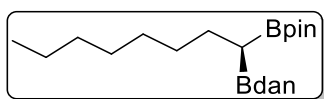

68

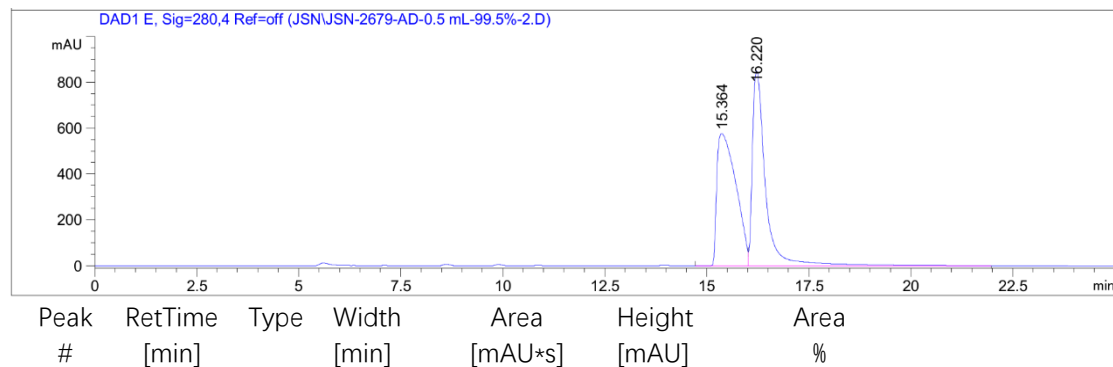



|   |        |    |        |           |           |         |
|---|--------|----|--------|-----------|-----------|---------|
| 1 | 15.364 | BV | 0.5678 | 1.86789e4 | 576.88287 | 49.5291 |
| 2 | 16.220 | VB | 0.3354 | 1.90341e4 | 849.55981 | 50.4709 |

**Supplementary Figure 314. HPLC of compound rac-68**

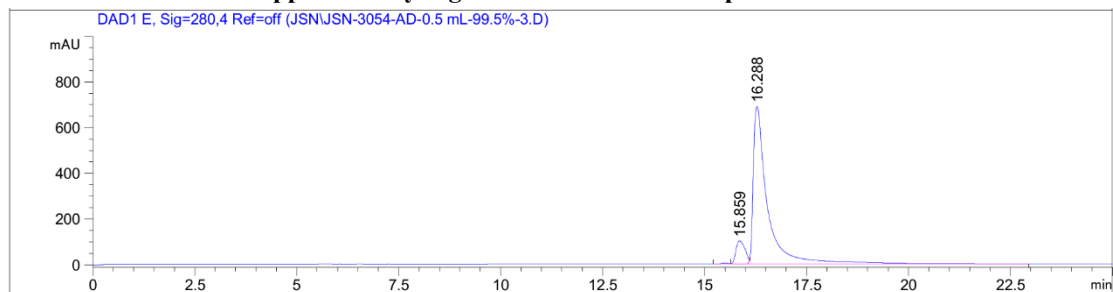

| Peak # | RetTime [min] | Type | Width [min] | Area [mAU*s] | Height [mAU] | Area % |
|--------|---------------|------|-------------|--------------|--------------|--------|
|--------|---------------|------|-------------|--------------|--------------|--------|

|   |        |      |        |            |           |         |
|---|--------|------|--------|------------|-----------|---------|
| 1 | 15.859 | VV E | 0.2648 | 1564.93420 | 101.00799 | 8.3759  |
| 2 | 16.288 | VB R | 0.3503 | 1.71188e4  | 690.36987 | 91.6241 |

**Supplementary Figure 315. HPLC of compound (R)-68**

**(R)-2-(1-(4,4,5,5-tetramethyl-1,3,2-dioxaborolan-2-yl)octyl)-2,3-dihydro-1H-naphtho[1,8-de][1,3,2]diazaborinine (69)**

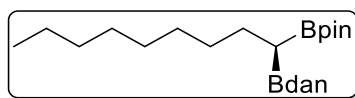

**69**

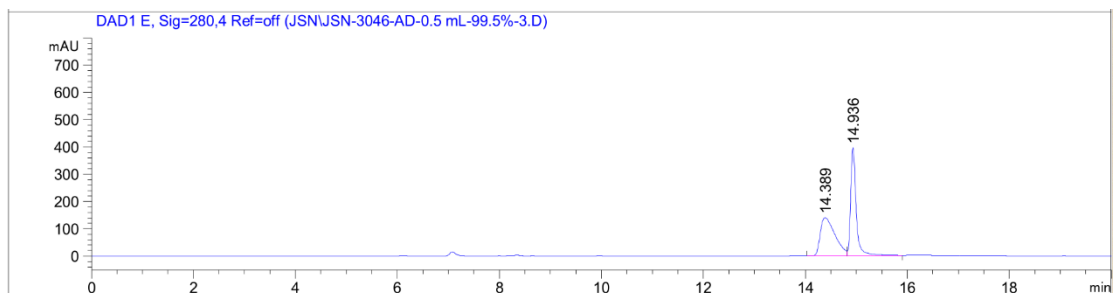

| Peak # | RetTime [min] | Type | Width [min] | Area [mAU*s] | Height [mAU] | Area % |
|--------|---------------|------|-------------|--------------|--------------|--------|
|--------|---------------|------|-------------|--------------|--------------|--------|

|   |        |    |        |            |           |         |
|---|--------|----|--------|------------|-----------|---------|
| 1 | 14.389 | BV | 0.3112 | 2783.11621 | 139.21651 | 48.6469 |
| 2 | 14.936 | VB | 0.1128 | 2937.93481 | 394.90619 | 51.3531 |

**Supplementary Figure 316. HPLC of compound rac-69**

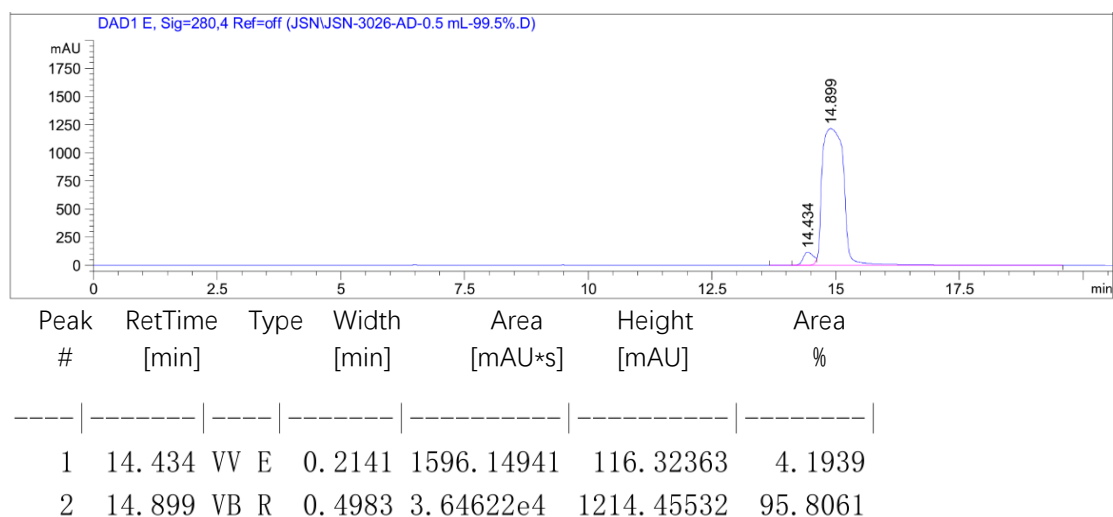

Supplementary Figure 317. HPLC of compound (R)-69

(R)-2-(5-methyl-1-(4,4,5,5-tetramethyl-1,3,2-dioxaborolan-2-yl)hexyl)-2,3-dihydro-1H-naphtho[1,8-de][1,3,2]diazaborinine (70)

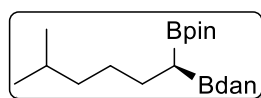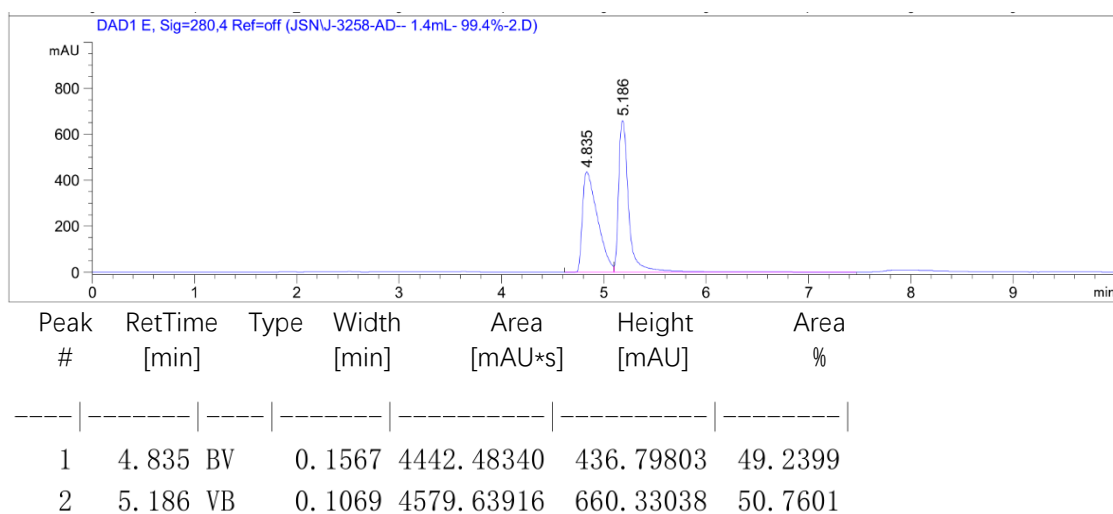

Supplementary Figure 318. HPLC of compound rac-70

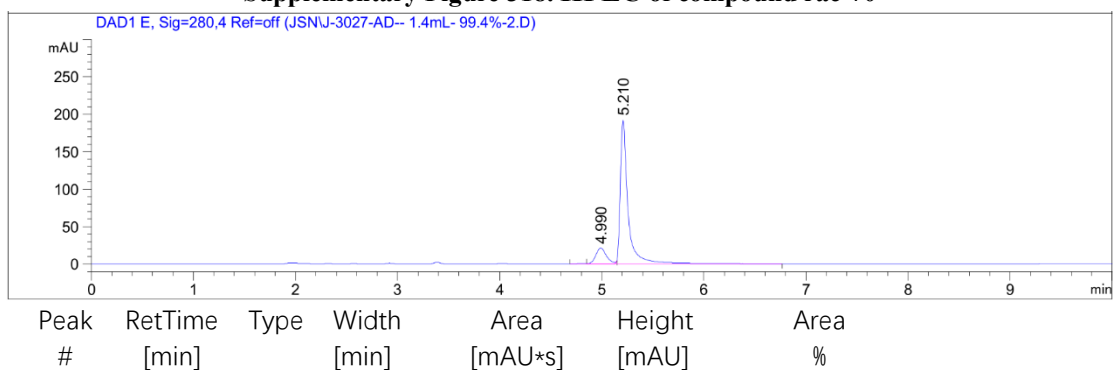

| Peak # | RetTime [min] | Type | Width [min] | Area [mAU*s] | Height [mAU] | Area %  |
|--------|---------------|------|-------------|--------------|--------------|---------|
| 1      | 4.990         | VV E | 0.1086      | 149.74039    | 21.14183     | 12.9321 |
| 2      | 5.210         | VB R | 0.0753      | 1008.15424   | 192.02641    | 87.0679 |

Supplementary Figure 319. HPLC of compound (R)-70

(R)-tert-butyl 4-(2-(1H-naphtho[1,8-de][1,3,2]diazaborinin-2(3H)-yl)-2-(4,4,5,5-tetramethyl-1,3,2-dioxaborolan-2-yl)ethyl)piperidine-1-carboxylate (71)

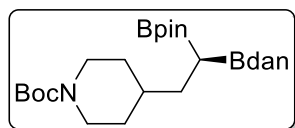

71

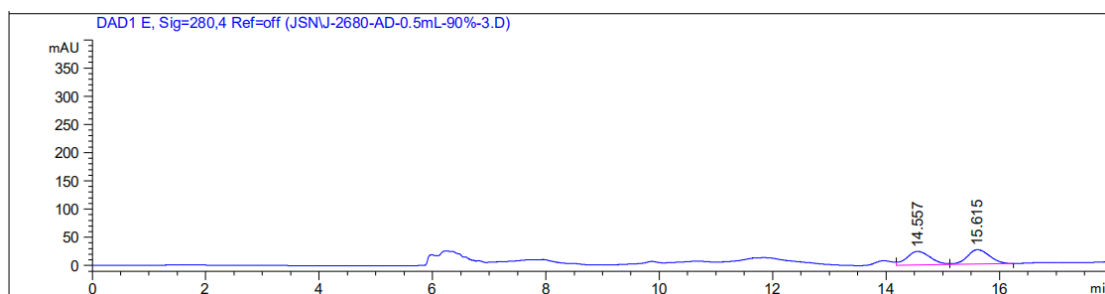

| Peak # | RetTime [min] | Type | Width [min] | Area [mAU*s] | Height [mAU] | Area %  |
|--------|---------------|------|-------------|--------------|--------------|---------|
| 1      | 14.557        | VV   | 0.4437      | 682.01819    | 23.84302     | 49.5257 |
| 2      | 15.615        | VB   | 0.4212      | 695.08228    | 25.56347     | 50.4743 |

Supplementary Figure 320. HPLC of compound rac-71

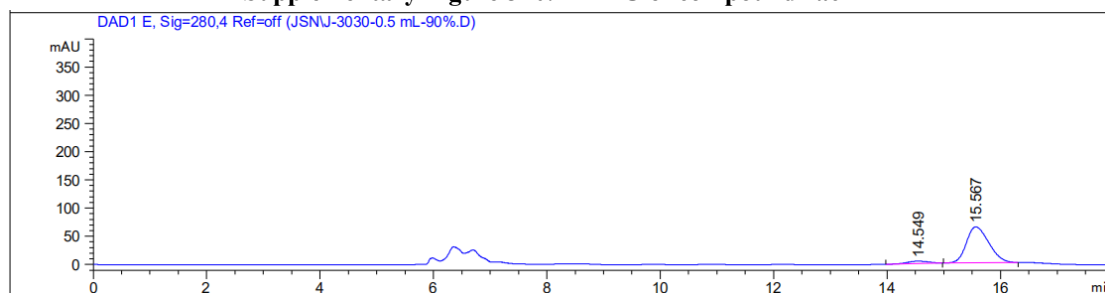

| Peak # | RetTime [min] | Type | Width [min] | Area [mAU*s] | Height [mAU] | Area %  |
|--------|---------------|------|-------------|--------------|--------------|---------|
| 1      | 14.549        | BB   | 0.4119      | 112.36375    | 4.28607      | 6.0284  |
| 2      | 15.567        | BB   | 0.4306      | 1751.53357   | 63.73475     | 93.9716 |

Supplementary Figure 321. HPLC of compound (R)-71

**(R)-2-(4-((tert-butyldimethylsilyl)oxy)-1-(4,4,5,5-tetramethyl-1,3,2-dioxaborolan-2-yl)butyl)-2,3-dihydro-1H-naphtho[1,8-de][1,3,2]diazaborinine (72)**

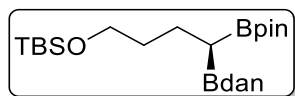

**72**

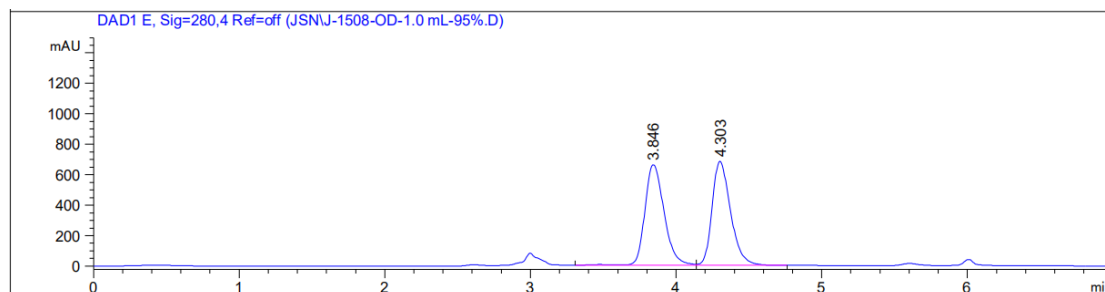

| Peak # | RetTime [min] | Type | Width [min] | Area [mAU*s] | Height [mAU] | Area %  |
|--------|---------------|------|-------------|--------------|--------------|---------|
| 1      | 3.846         | VV R | 0.1403      | 6057.28271   | 659.75140    | 50.1609 |
| 2      | 4.303         | VB   | 0.1346      | 6018.42969   | 684.03479    | 49.8391 |

**Supplementary Figure 322. HPLC of compound rac-72**

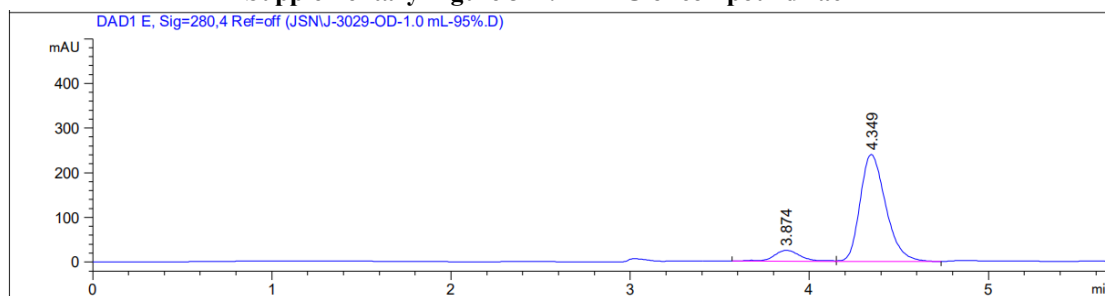

| Peak # | RetTime [min] | Type | Width [min] | Area [mAU*s] | Height [mAU] | Area %  |
|--------|---------------|------|-------------|--------------|--------------|---------|
| 1      | 3.874         | VV R | 0.1544      | 250.04866    | 24.26586     | 9.5449  |
| 2      | 4.349         | VB   | 0.1535      | 2369.64746   | 239.29808    | 90.4551 |

**Supplementary Figure 323. HPLC of compound (R)-72**

**(R)-2-(6-((tert-butyldimethylsilyl)oxy)-1-(4,4,5,5-tetramethyl-1,3,2-dioxaborolan-2-yl)hexyl)-2,3-dihydro-1H-naphtho[1,8-de][1,3,2]diazaborinine (73)**

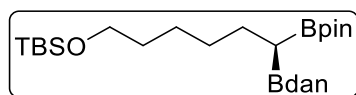

**73**

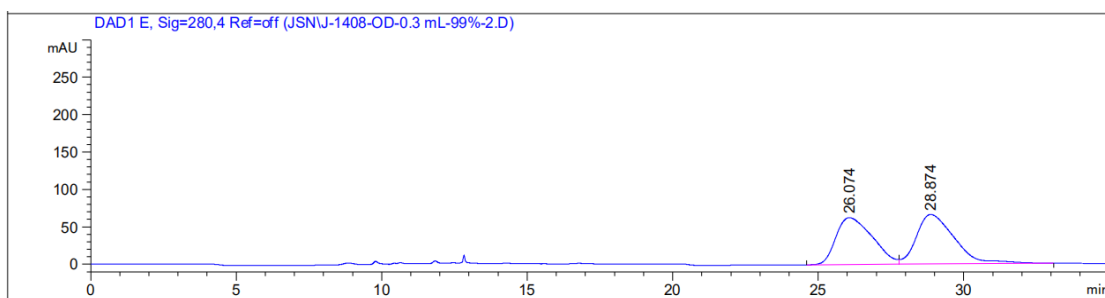

| Peak # | RetTime [min] | Type | Width [min] | Area [mAU*s] | Height [mAU] | Area %  |
|--------|---------------|------|-------------|--------------|--------------|---------|
| 1      | 26.074        | BV   | 1.2310      | 5440.52539   | 62.65578     | 47.6667 |
| 2      | 28.874        | VB   | 1.2352      | 5973.15967   | 66.16544     | 52.3333 |

Supplementary Figure 324. HPLC of compound rac-73

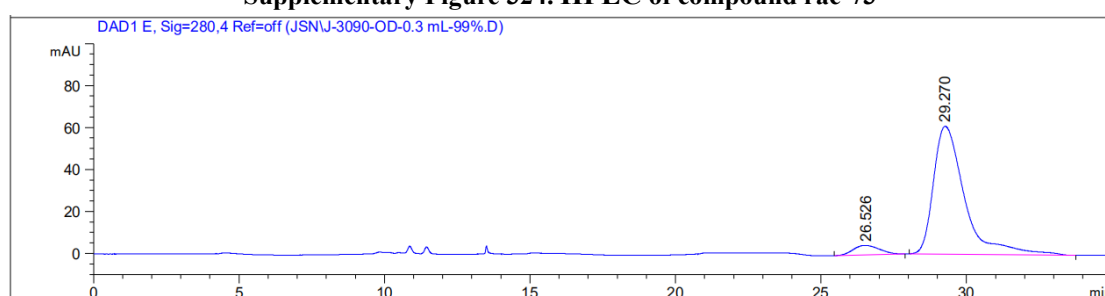

| Peak # | RetTime [min] | Type | Width [min] | Area [mAU*s] | Height [mAU] | Area %  |
|--------|---------------|------|-------------|--------------|--------------|---------|
| 1      | 26.526        | BB   | 0.7359      | 285.30493    | 4.56008      | 5.9039  |
| 2      | 29.270        | BB   | 1.1142      | 4547.15088   | 60.96195     | 94.0961 |

Supplementary Figure 325. HPLC of compound (R)-73

**(R)-2-(5-((tert-butyl)phenylsilyloxy)-1-(4,4,5,5-tetramethyl-1,3,2-dioxaborolan-2-yl)pentyl)-2,3-dihydro-1H-naphtho[1,8-de][1,3,2]diazaborinine (74)**

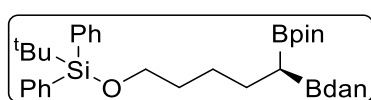

74

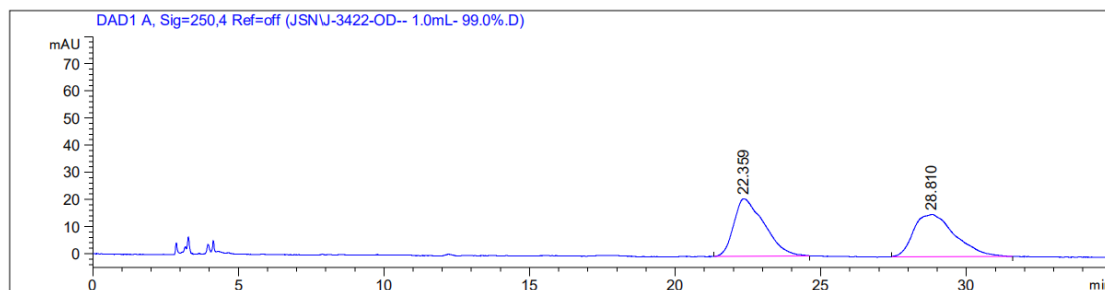

| Peak # | RetTime [min] | Type | Width [min] | Area [mAU*s] | Height [mAU] | Area %  |
|--------|---------------|------|-------------|--------------|--------------|---------|
| 1      | 22.359        | BB   | 0.8592      | 1536.34949   | 21.20619     | 49.8997 |
| 2      | 28.810        | BB   | 1.1670      | 1542.52344   | 15.58082     | 50.1003 |

Supplementary Figure 326. HPLC of compound rac-74

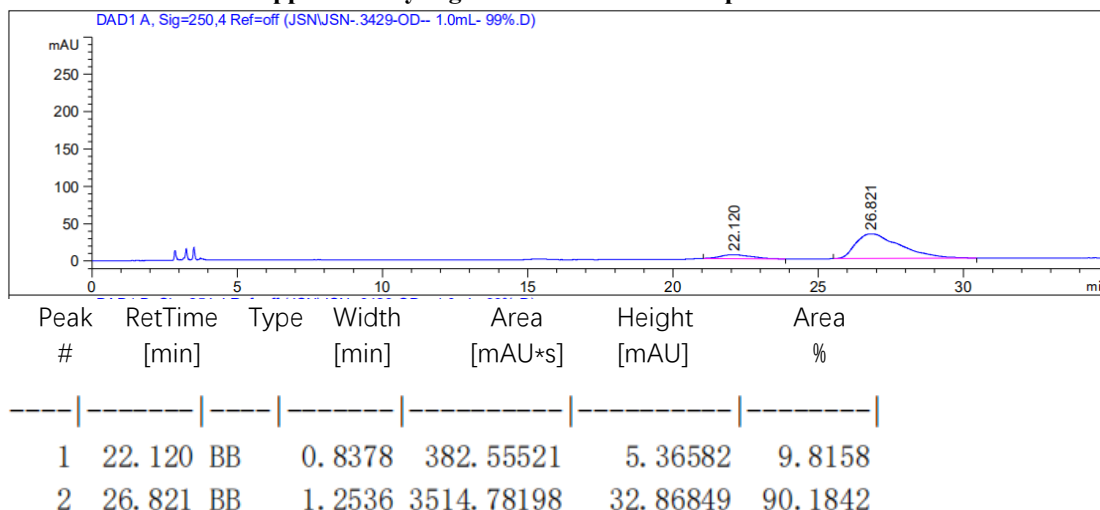

Supplementary Figure 327. HPLC of compound (R)-74

(R)-2-(1-(4,4,5,5-tetramethyl-1,3,2-dioxaborolan-2-yl)-5-((triisopropylsilyloxy)pentyl)-2,3-dihydro-1H-naphtho[1,8-de][1,3,2]diazaborinine (75)

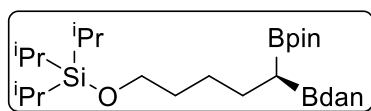

75

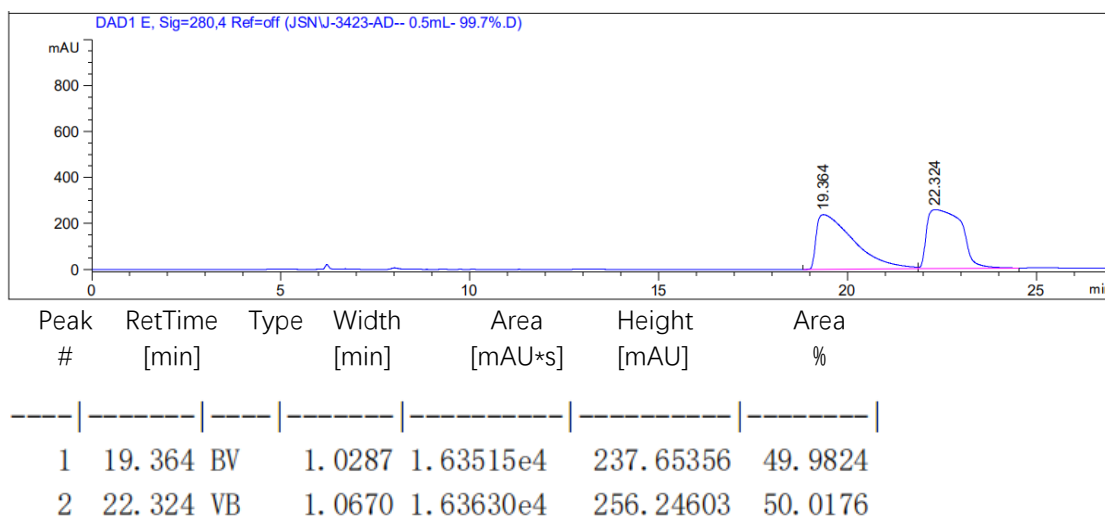

Supplementary Figure 328. HPLC of compound rac-75

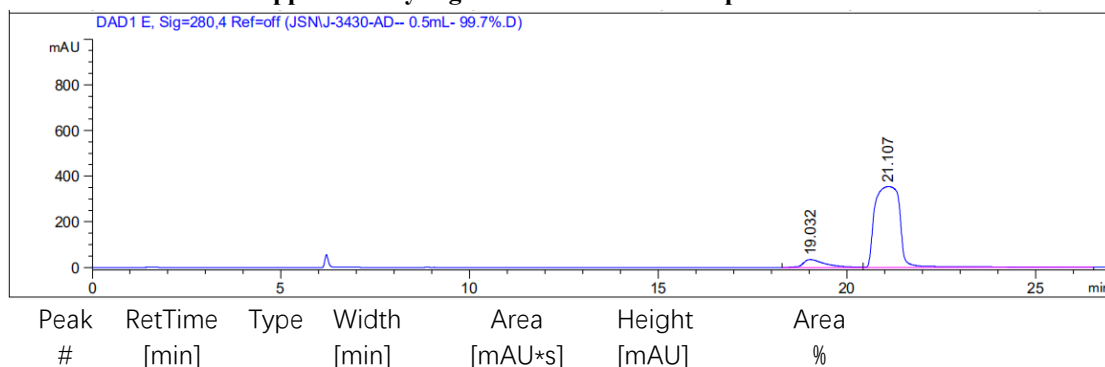

|   |        |    |        |            |           |         |
|---|--------|----|--------|------------|-----------|---------|
| 1 | 19.032 | BV | 0.6016 | 1473.51355 | 35.39914  | 8.1744  |
| 2 | 21.107 | VB | 0.7746 | 1.65523e4  | 354.57391 | 91.8256 |

Supplementary Figure 329. HPLC of compound (R)-75

(R)-5-(1H-naphtho[1,8-de][1,3,2]diazaborinin-2(3H)-yl)-5-(4,4,5,5-tetramethyl-1,3,2-dioxaborolan-2-yl)pentyl propionate (76)

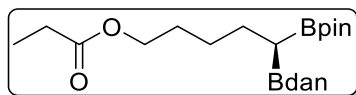

76

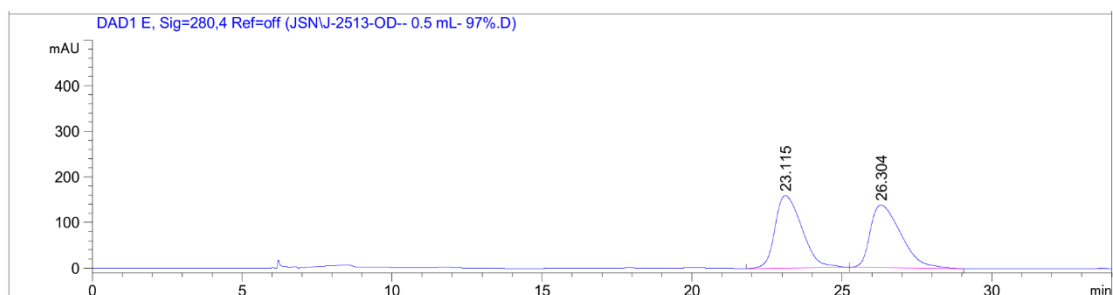

| Peak # | RetTime [min] | Type | Width [min] | Area [mAU*s] | Height [mAU] | Area % |
|--------|---------------|------|-------------|--------------|--------------|--------|
|--------|---------------|------|-------------|--------------|--------------|--------|

|   |        |    |        |            |           |         |
|---|--------|----|--------|------------|-----------|---------|
| 1 | 23.115 | BB | 0.9577 | 9865.75195 | 158.60326 | 50.3779 |
| 2 | 26.304 | BB | 1.0479 | 9717.75684 | 137.27243 | 49.6221 |

Supplementary Figure 330. HPLC of compound rac-76

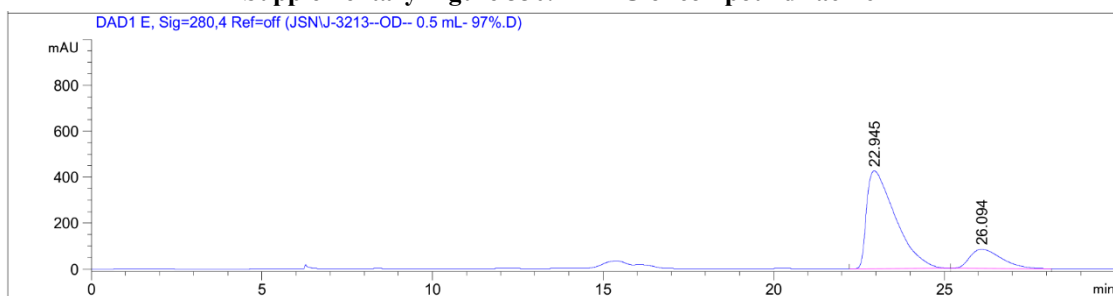

| Peak # | RetTime [min] | Type | Width [min] | Area [mAU*s] | Height [mAU] | Area % |
|--------|---------------|------|-------------|--------------|--------------|--------|
|--------|---------------|------|-------------|--------------|--------------|--------|

|   |        |     |        |            |           |         |
|---|--------|-----|--------|------------|-----------|---------|
| 1 | 22.945 | BB  | 0.8712 | 2.49334e4  | 425.77872 | 89.6176 |
| 2 | 26.094 | BBA | 0.7264 | 2888.58594 | 62.59844  | 10.3824 |

Supplementary Figure 331. HPLC of compound (R)-76

**(R)-5-(1H-naphtho[1,8-de][1,3,2]diazaborinin-2(3H)-yl)-5-(4,4,5,5-tetramethyl-1,3,2-dioxaborolan-2-yl)pentyl (2E,4E)-hexa-2,4-dienoate (77)**

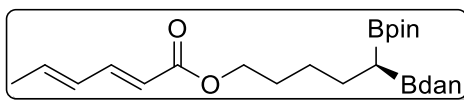

77

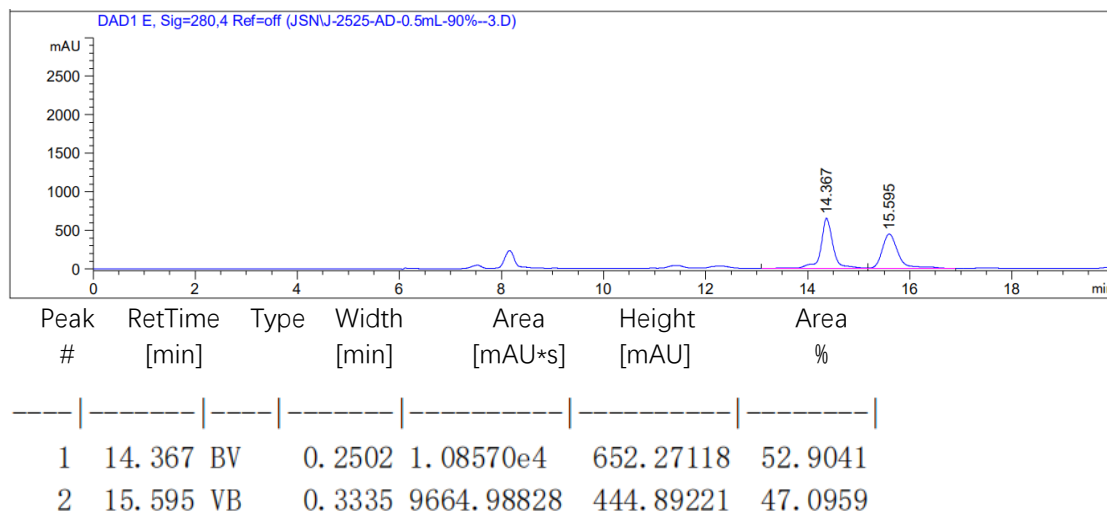

**Supplementary Figure 332. HPLC of compound rac-77**

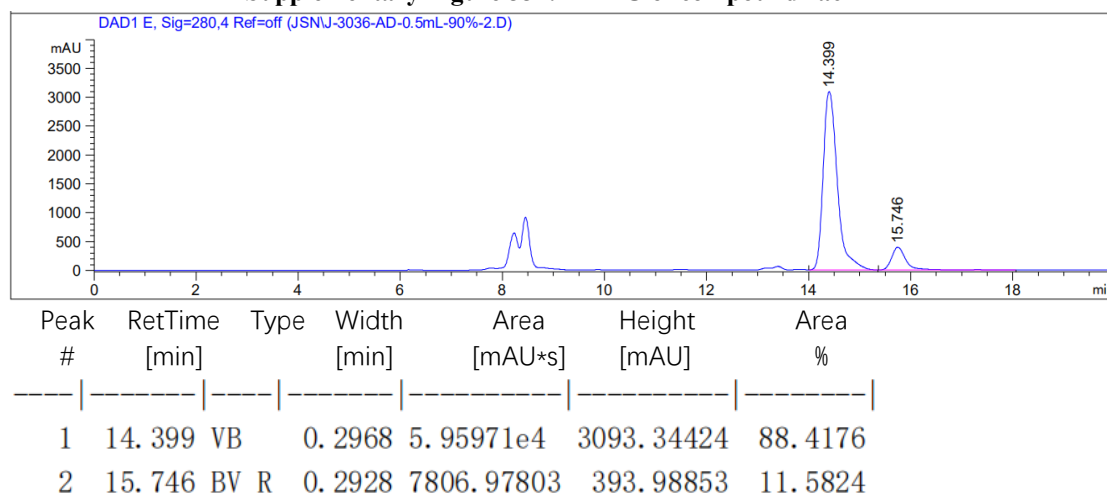

**Supplementary Figure 333. HPLC of compound (R)-77**

**(R)-5-(1H-naphtho[1,8-de][1,3,2]diazaborinin-2(3H)-yl)-5-(4,4,5,5-tetramethyl-1,3,2-dioxaborolan-2-yl)pentyl 2-propylpentanoate (78)**

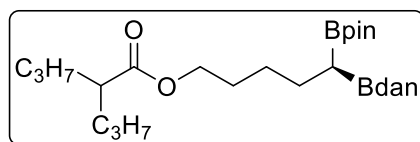

78



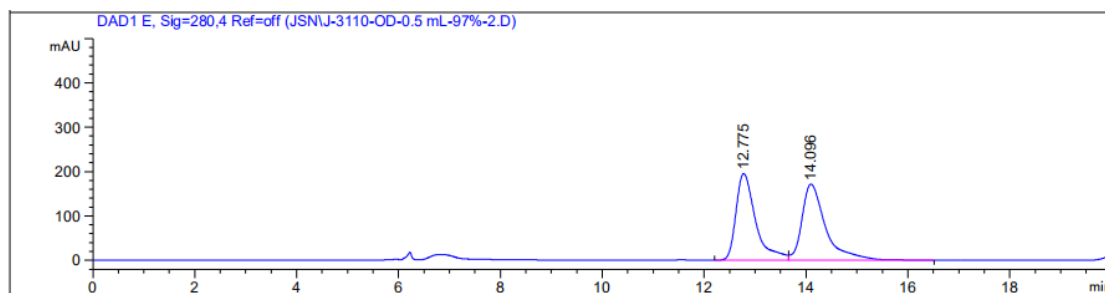

| Peak # | RetTime [min] | Type | Width [min] | Area [mAU*s] | Height [mAU] | Area %  |
|--------|---------------|------|-------------|--------------|--------------|---------|
| 1      | 12.775        | BV   | 0.4045      | 5219.79346   | 194.85825    | 48.6710 |
| 2      | 14.096        | VB   | 0.4808      | 5504.84521   | 171.35628    | 51.3290 |

**Supplementary Figure 334. HPLC of compound rac-78**

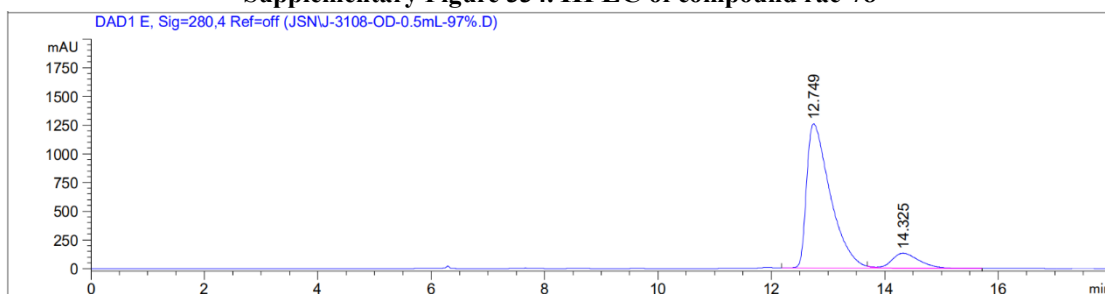

| Peak # | RetTime [min] | Type | Width [min] | Area [mAU*s] | Height [mAU] | Area %  |
|--------|---------------|------|-------------|--------------|--------------|---------|
| 1      | 12.749        | BV R | 0.4360      | 3.63390e4    | 1254.20691   | 89.4230 |
| 2      | 14.325        | VB E | 0.5080      | 4298.18896   | 129.89571    | 10.5770 |

**Supplementary Figure 335. HPLC of compound (R)-78**

**(R)-5-(1H-naphtho[1,8-de][1,3,2]diazaborinin-2(3H)-yl)-5-(4,4,5,5-tetramethyl-1,3,2-dioxaborolan-2-yl)pentyl benzoate (79)**

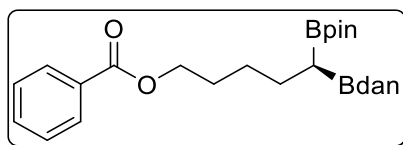

**79**

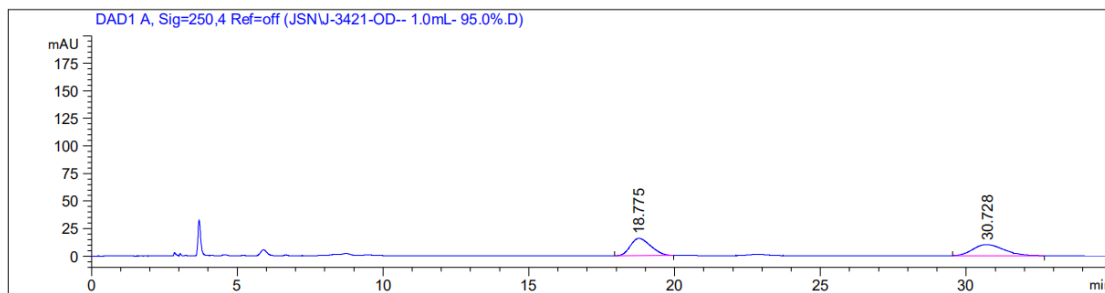

| Peak # | RetTime [min] | Type | Width [min] | Area [mAU*s] | Height [mAU] | Area % |
|--------|---------------|------|-------------|--------------|--------------|--------|
| 1      | 18.775        |      |             |              |              |        |
| 2      | 30.728        |      |             |              |              |        |

|   |        |    |        |           |          |         |
|---|--------|----|--------|-----------|----------|---------|
| 1 | 18.775 | BB | 0.6103 | 760.43848 | 15.66695 | 50.6188 |
| 2 | 30.728 | BB | 0.8727 | 741.84705 | 10.05539 | 49.3812 |

Supplementary Figure 336. HPLC of compound rac-79

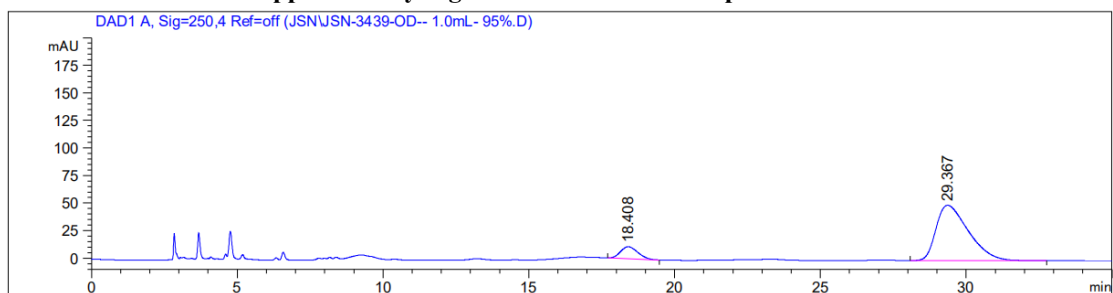

| Peak # | RetTime [min] | Type | Width [min] | Area [mAU*s] | Height [mAU] | Area %  |
|--------|---------------|------|-------------|--------------|--------------|---------|
| 1      | 18.408        | BB   | 0.6327      | 451.63766    | 10.91542     | 10.4569 |
| 2      | 29.367        | BB   | 1.1192      | 3867.39209   | 50.17798     | 89.5431 |

Supplementary Figure 337. HPLC of compound (R)-79

(R)-5-(1H-naphtho[1,8-de][1,3,2]diazaborinin-2(3H)-yl)-5-(4,4,5,5-tetramethyl-1,3,2-dioxaborolan-2-yl)pentyl 4-methylbenzoate (80)

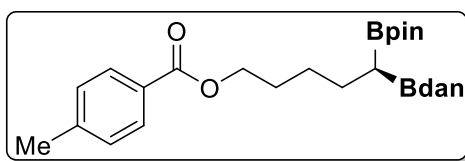

80

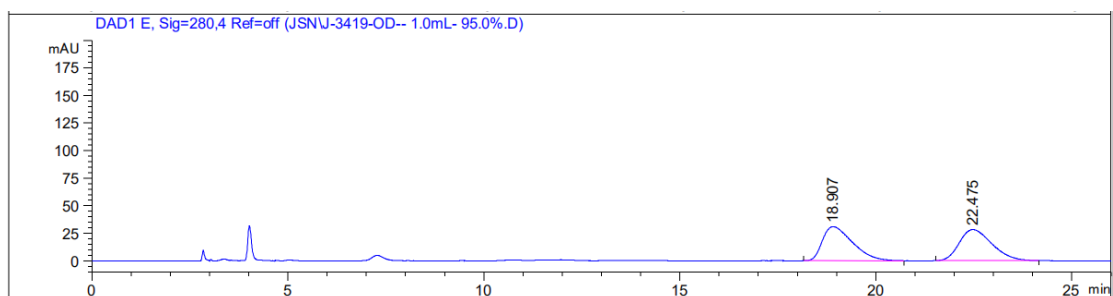

| Peak # | RetTime [min] | Type | Width [min] | Area [mAU*s] | Height [mAU] | Area %  |
|--------|---------------|------|-------------|--------------|--------------|---------|
| 1      | 18.907        | BB   | 0.7182      | 1655.19128   | 30.93835     | 50.2387 |
| 2      | 22.475        | BB   | 0.6986      | 1639.46509   | 28.26812     | 49.7613 |

Supplementary Figure 338. HPLC of compound rac-80

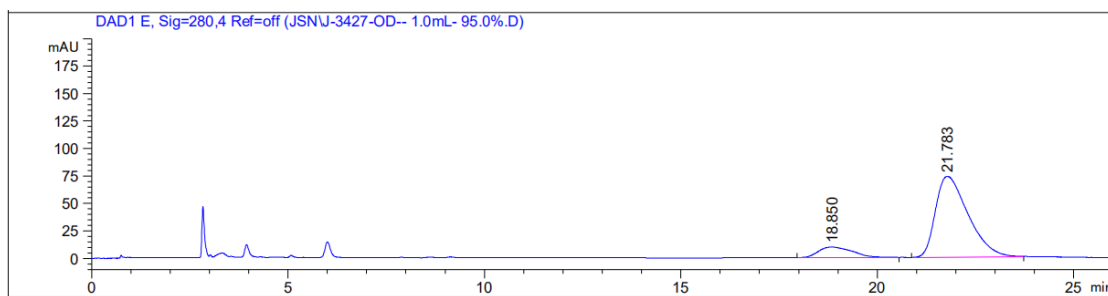

| Peak # | RetTime [min] | Type | Width [min] | Area [mAU*s] | Height [mAU] | Area %  |
|--------|---------------|------|-------------|--------------|--------------|---------|
| 1      | 18.850        | BB   | 0.7130      | 574.25592    | 9.55793      | 11.9572 |
| 2      | 21.783        | BB   | 0.8210      | 4228.35547   | 73.51833     | 88.0428 |

Supplementary Figure 339. HPLC of compound (R)-80

(R)-5-(1H-naphtho[1,8-de][1,3,2]diazaborinin-2(3H)-yl)-5-(4,4,5,5-tetramethyl-1,3,2-dioxaborolan-2-yl)pentyl 4-cyclohexylbenzoate (81)

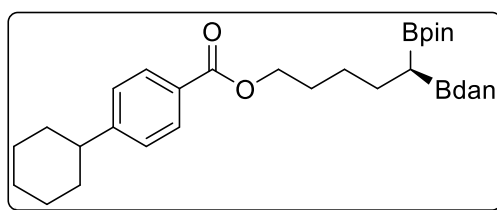

81

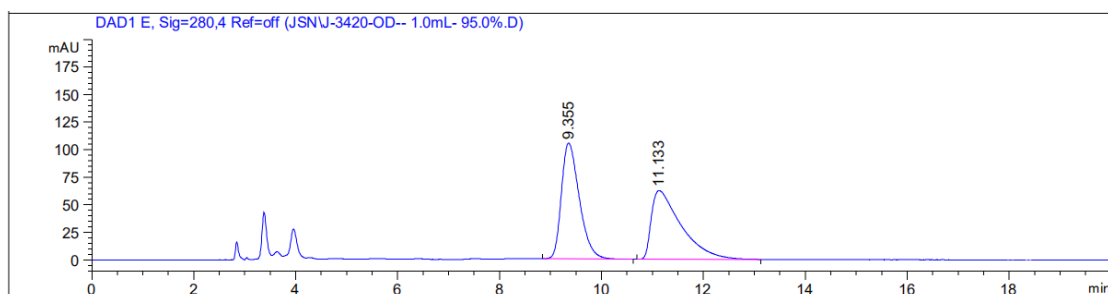

| Peak # | RetTime [min] | Type | Width [min] | Area [mAU*s] | Height [mAU] | Area %  |
|--------|---------------|------|-------------|--------------|--------------|---------|
| 1      | 9.355         | BB   | 0.3707      | 2561.59302   | 104.98648    | 50.3330 |
| 2      | 11.133        | BB   | 0.5717      | 2527.70117   | 62.24888     | 49.6670 |

Supplementary Figure 340. HPLC of compound rac-81

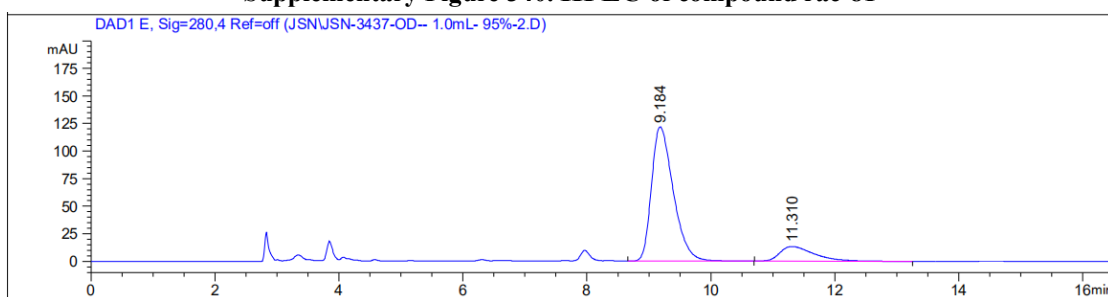

| Peak # | RetTime [min] | Type | Width [min] | Area [mAU*s] | Height [mAU] | Area % |
|--------|---------------|------|-------------|--------------|--------------|--------|
| 1      | 9.184         |      |             |              |              |        |
| 2      | 11.310        |      |             |              |              |        |

|   |        |    |        |            |           |         |
|---|--------|----|--------|------------|-----------|---------|
| 1 | 9.184  | BB | 0.3745 | 2967.78223 | 121.71830 | 85.3946 |
| 2 | 11.310 | BB | 0.5770 | 507.59317  | 13.30732  | 14.6054 |

Supplementary Figure 341. HPLC of compound (R)-81

(R)-5-(1H-naphtho[1,8-de][1,3,2]diazaborinin-2(3H)-yl)-5-(4,4,5,5-tetramethyl-1,3,2-dioxaborolan-2-yl)pentyl (E)-2-methyl-3-phenylacrylate (82)

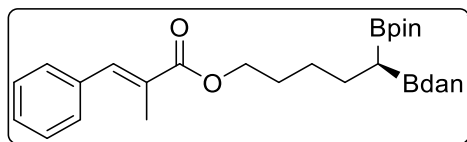

82

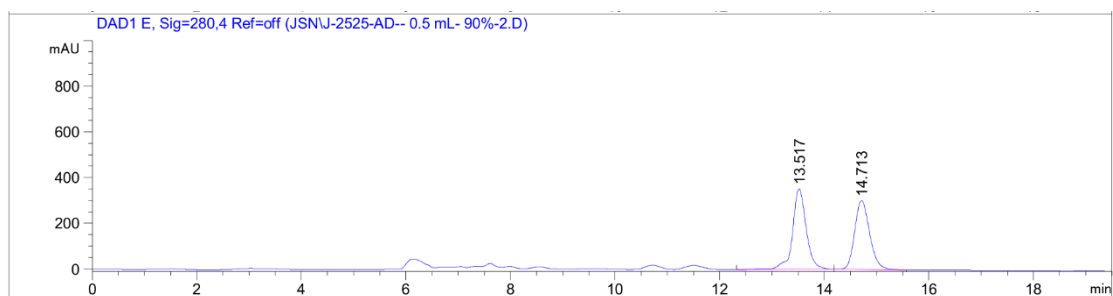

| Peak # | RetTime [min] | Type | Width [min] | Area [mAU*s] | Height [mAU] | Area % |
|--------|---------------|------|-------------|--------------|--------------|--------|
|--------|---------------|------|-------------|--------------|--------------|--------|

|   |        |    |        |            |           |         |
|---|--------|----|--------|------------|-----------|---------|
| 1 | 13.517 | BB | 0.2736 | 6394.96436 | 352.56653 | 51.6419 |
| 2 | 14.713 | BB | 0.3076 | 5988.32373 | 301.63293 | 48.3581 |

Supplementary Figure 342. HPLC of compound rac-82

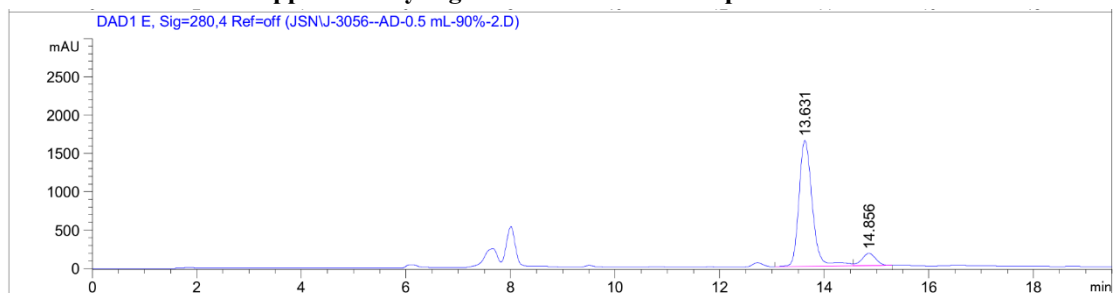

| Peak # | RetTime [min] | Type | Width [min] | Area [mAU*s] | Height [mAU] | Area % |
|--------|---------------|------|-------------|--------------|--------------|--------|
|--------|---------------|------|-------------|--------------|--------------|--------|

|   |        |      |        |            |            |         |
|---|--------|------|--------|------------|------------|---------|
| 1 | 13.631 | BV R | 0.2658 | 2.92452e4  | 1641.33691 | 90.7317 |
| 2 | 14.856 | VB E | 0.2862 | 2987.40381 | 161.22876  | 9.2683  |

Supplementary Figure 343. HPLC of compound (R)-82

**(R)-2-(2-phenyl-1-(4,4,5,5-tetramethyl-1,3,2-dioxaborolan-2-yl)ethyl)-2,3-dihydro-1H-naphtho[1,8-de][1,3,2]diazaborinine (87<sup>a</sup>)**

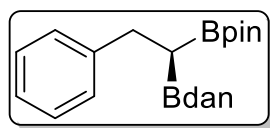

**87<sup>a</sup>**

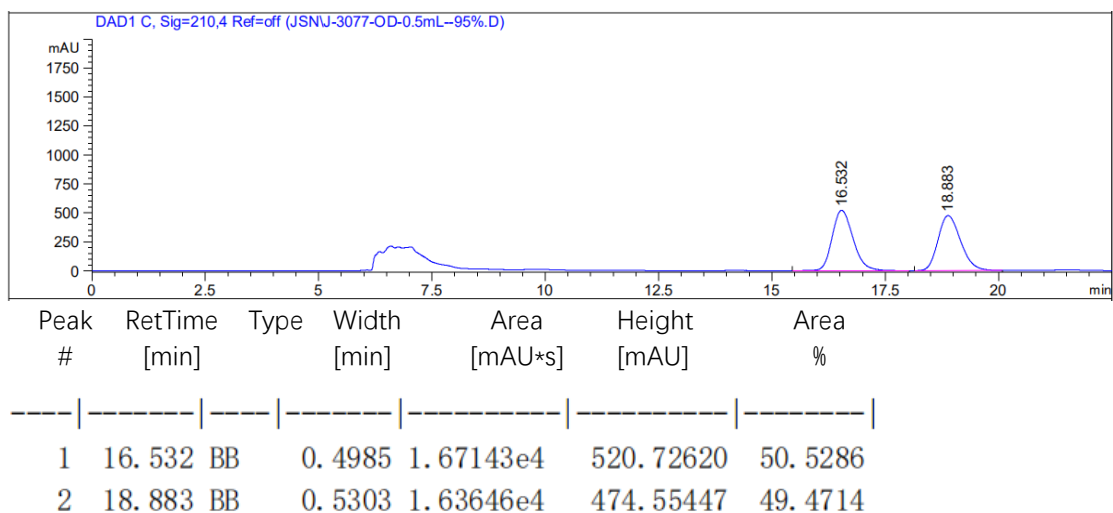

**Supplementary Figure 344. HPLC of compound rac-87<sup>a</sup>**

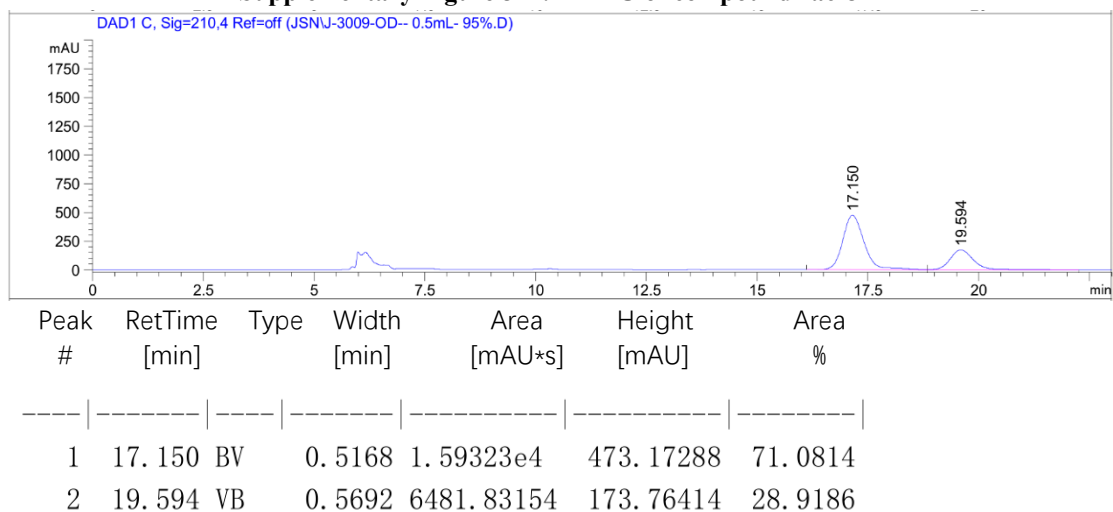

**Supplementary Figure 345. HPLC of compound (R)- 87<sup>a</sup>**

**(S)-2-(2-phenyl-1-(4,4,5,5-tetramethyl-1,3,2-dioxaborolan-2-yl)ethyl)-2,3-dihydro-1H-naphtho[1,8-de][1,3,2]diazaborinine (87<sup>b</sup>)**

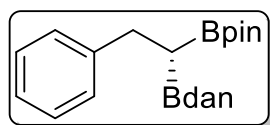

**87<sup>b</sup>**

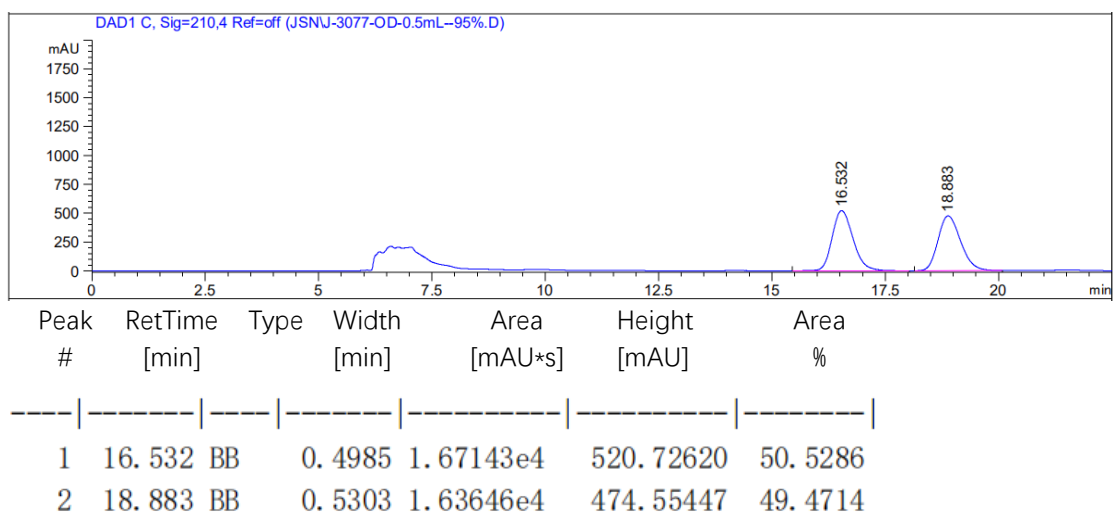

Supplementary Figure 346. HPLC of compound rac-87<sup>b</sup>

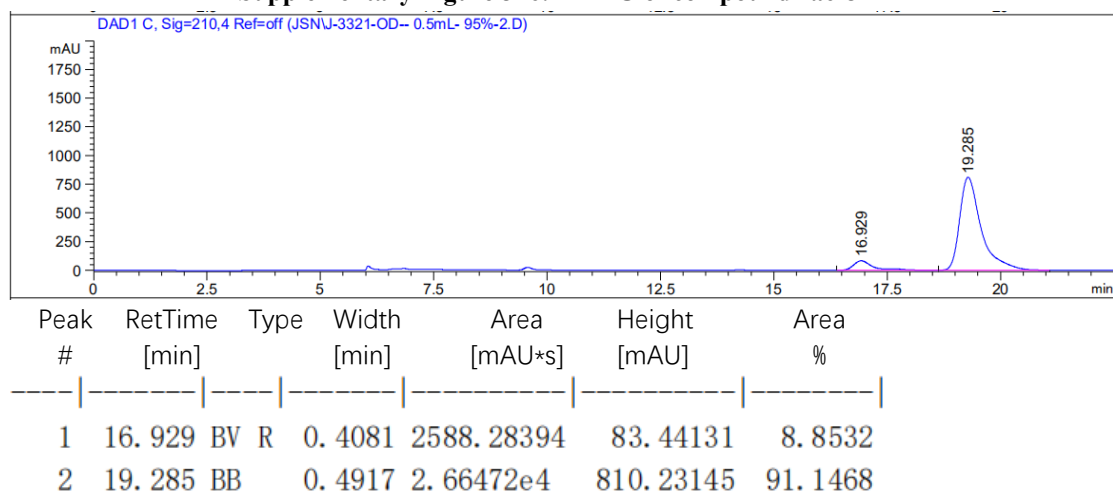

Supplementary Figure 347. HPLC of compound (S)- 87<sup>b</sup>

(S)-2-(1-(4,4,5,5-tetramethyl-1,3,2-dioxaborolan-2-yl)-2-(p-tolyl)ethyl)-2,3-dihydro-1H-naphtho[1,8-de][1,3,2]diazaborinine (**88**)

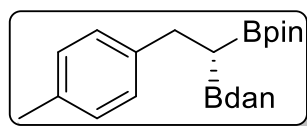

**88**

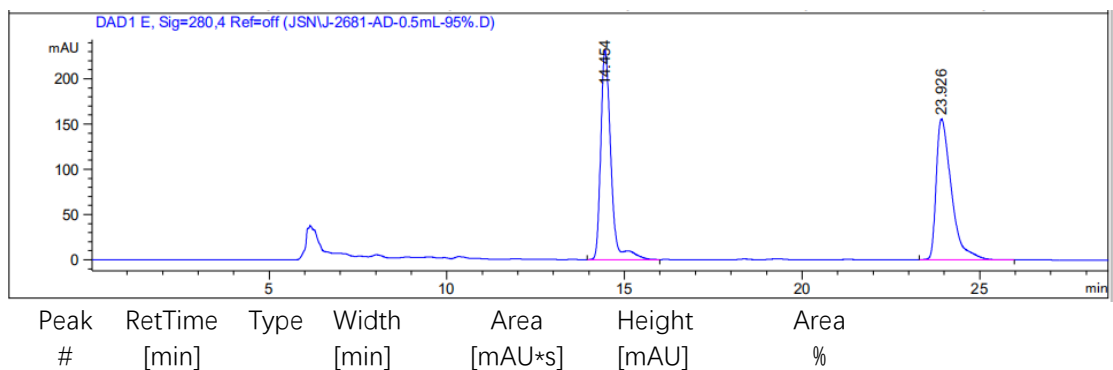

|   |        |      |        |            |           |         |
|---|--------|------|--------|------------|-----------|---------|
| 1 | 14.454 | BV R | 0.2911 | 4615.70898 | 231.86812 | 49.9542 |
| 2 | 23.926 | BB   | 0.4531 | 4624.17871 | 155.42926 | 50.0458 |

Supplementary Figure 348. HPLC of compound rac-88

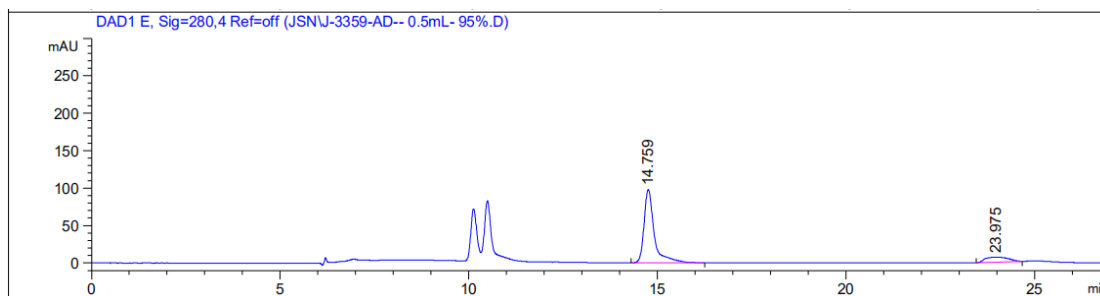

| Peak # | RetTime [min] | Type | Width [min] | Area [mAU*s] | Height [mAU] | Area %  |
|--------|---------------|------|-------------|--------------|--------------|---------|
| 1      | 14.759        | BB   | 0.2792      | 1841.42896   | 97.99349     | 86.4962 |
| 2      | 23.975        | BB   | 0.5068      | 287.48306    | 6.77800      | 13.5038 |

Supplementary Figure 349. HPLC of compound (S)- 88

(S)-2-(1-(4,4,5,5-tetramethyl-1,3,2-dioxaborolan-2-yl)-2-(m-tolyl)ethyl)-2,3-dihydro-1H-naphtho[1,8-de][1,3,2]diazaborinine (99)

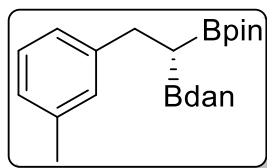

89

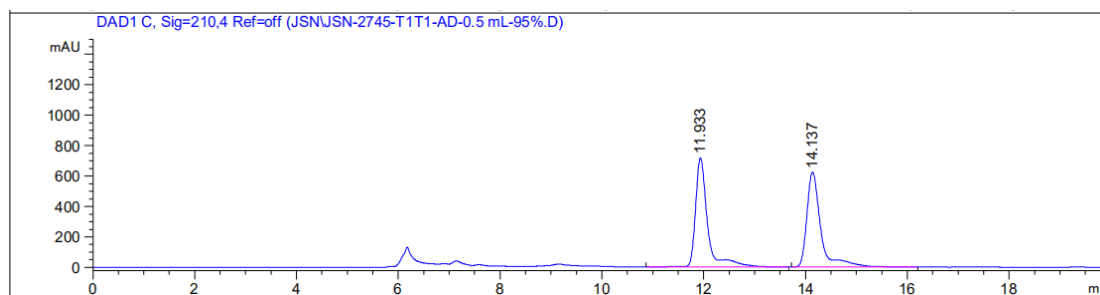

| Peak # | RetTime [min] | Type | Width [min] | Area [mAU*s] | Height [mAU] | Area %  |
|--------|---------------|------|-------------|--------------|--------------|---------|
| 1      | 11.933        | BV R | 0.2246      | 1.19339e4    | 716.41162    | 49.9321 |
| 2      | 14.137        | BV R | 0.2673      | 1.19664e4    | 623.34894    | 50.0679 |

Supplementary Figure 350. HPLC of compound rac-89

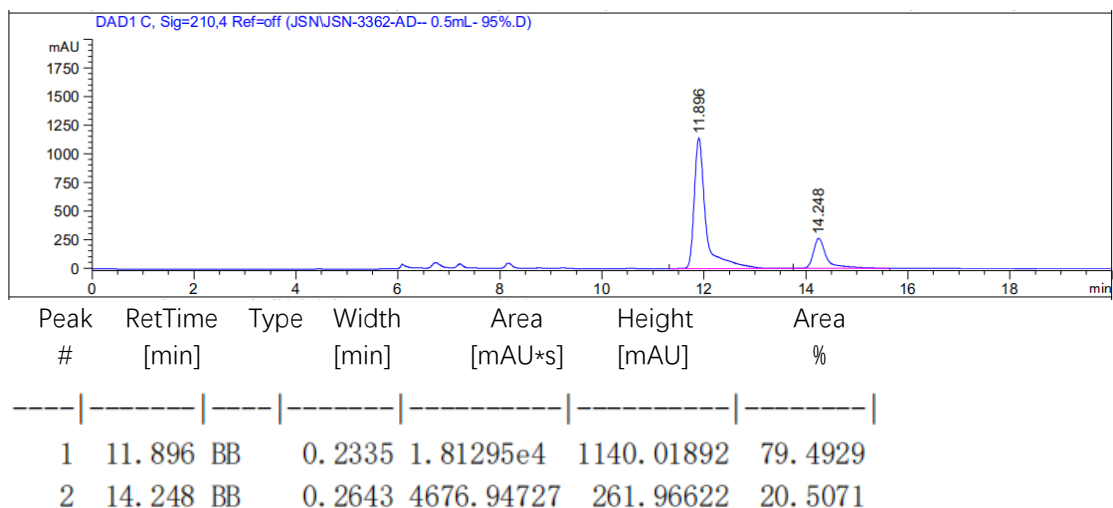

Supplementary Figure 351. HPLC of compound (S)- 89

(S)-2-(2-(4-ethylphenyl)-1-(4,4,5,5-tetramethyl-1,3,2-dioxaborolan-2-yl)ethyl)-2,3-dihydro-1H-naphtho[1,8-de][1,3,2]diazaborinine (90)

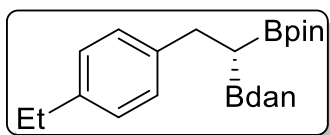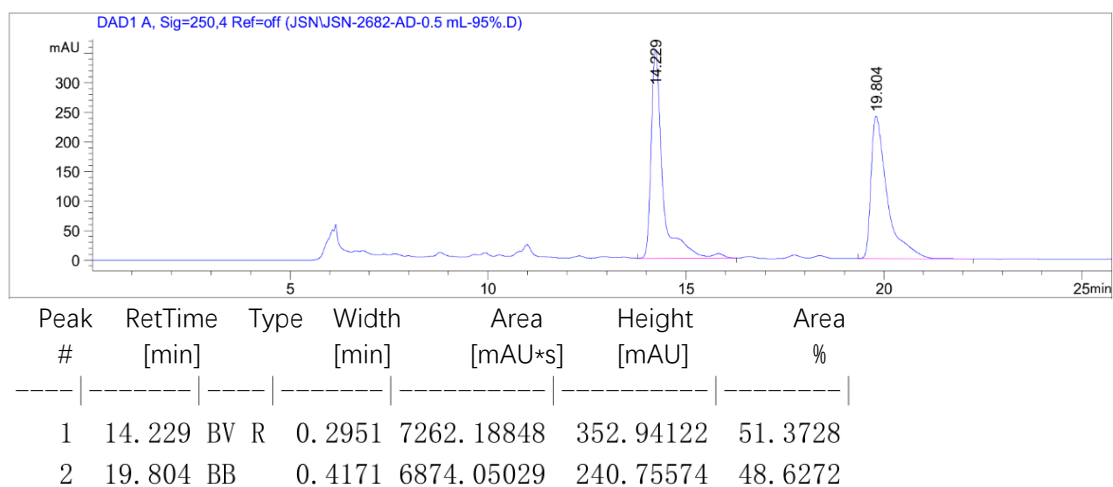

Supplementary Figure 352. HPLC of compound rac-90

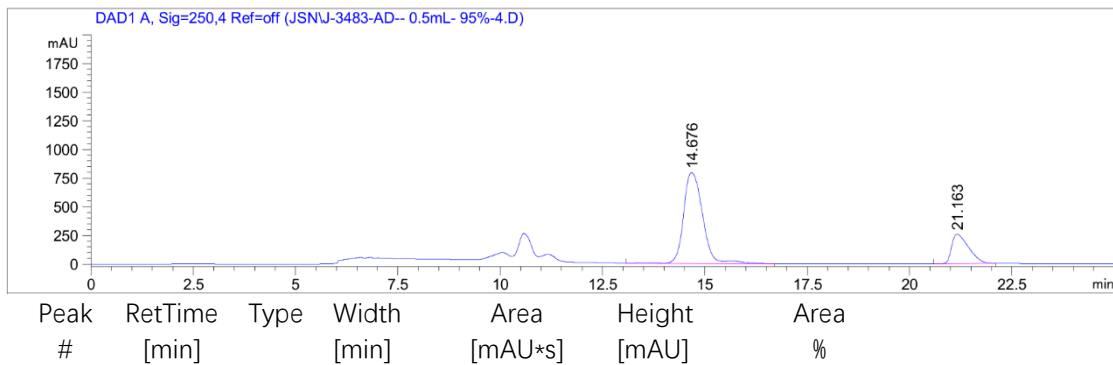



|   |        |    |   |        |            |           |         |
|---|--------|----|---|--------|------------|-----------|---------|
| 1 | 14.676 | VV | R | 0.4974 | 2.56564e4  | 790.87378 | 77.7908 |
| 2 | 21.163 | BB |   | 0.4387 | 7324.85742 | 256.82422 | 22.2092 |

Supplementary Figure 353. HPLC of compound (S)- 90

(R)-2-(2-(4-propylphenyl)-1-(4,4,5,5-tetramethyl-1,3,2-dioxaborolan-2-yl)ethyl)-2,3-dihydro-1H-naphtho[1,8-de][1,3,2]diazaborinine (91)

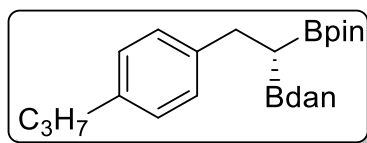

91

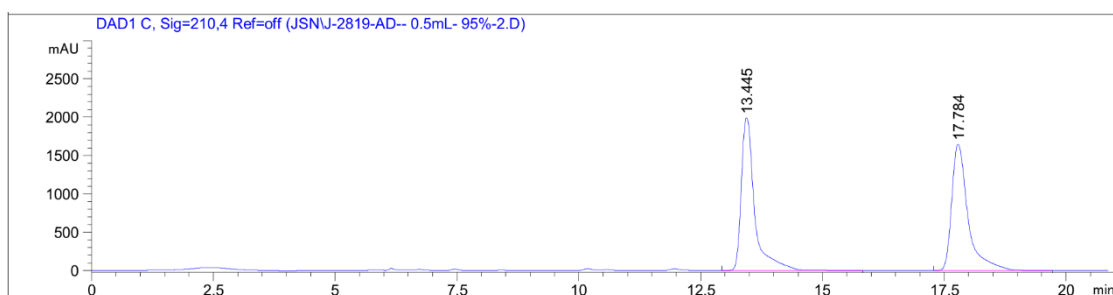

| Peak # | RetTime [min] | Type | Width [min] | Area [mAU*s] | Height [mAU] | Area % |
|--------|---------------|------|-------------|--------------|--------------|--------|
|--------|---------------|------|-------------|--------------|--------------|--------|

|   |        |    |        |           |            |         |
|---|--------|----|--------|-----------|------------|---------|
| 1 | 13.445 | BB | 0.2871 | 3.80495e4 | 1990.14209 | 49.7613 |
| 2 | 17.784 | BB | 0.3443 | 3.84146e4 | 1645.87903 | 50.2387 |

Supplementary Figure 354. HPLC of compound rac-91

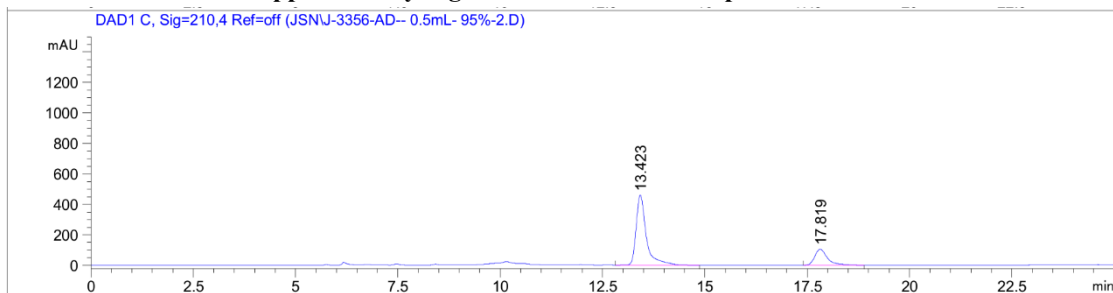

| Peak # | RetTime [min] | Type | Width [min] | Area [mAU*s] | Height [mAU] | Area % |
|--------|---------------|------|-------------|--------------|--------------|--------|
|--------|---------------|------|-------------|--------------|--------------|--------|

|   |        |    |        |            |           |         |
|---|--------|----|--------|------------|-----------|---------|
| 1 | 13.423 | BB | 0.2572 | 7999.01611 | 459.16885 | 77.2766 |
| 2 | 17.819 | BB | 0.3268 | 2352.13037 | 106.02388 | 22.7234 |

Supplementary Figure 355. HPLC of compound (S)- 91

## 5. Supplementary References

1. Kuang, Z., Mai, S., Yang, K. & Song, Q. Synthesis of anti-vicinal diboronates from diarylethyne and B<sub>2</sub>pin<sub>2</sub>. *Science Bulletin*. **64**, 1685-1690 (2019).
2. Feng, X., Jeon, H. & Yun, J. Regio- and Enantioselective Copper(I)-Catalyzed Hydroboration of Borylalkenes: Asymmetric Synthesis of 1,1-Diborylalkanes. *Angew. Chem. Int. Ed.* **52**, 3989–3992 (2013).
3. Gaussian 16, Revision A.03, Frisch, M. J.; Trucks, G. W.; Schlegel, H. B.; Scuseria, G. E.; Robb, M. A.; Cheeseman, J. R.; Scalmani, G.; Barone, V.; Petersson, G. A.; Nakatsuji, H.; Li, X.; Caricato, M.; A. Marenich, V.; Bloino, J.; Janesko, B. G.; Gomperts, R.; Mennucci, B.; Hratchian, H. P.; Ortiz, J. V.; Izmaylov, A. F.; Sonnenberg, J. L.; Williams-Young, D.; Ding, F.; Lipparini, F.; Egidi, F.; Goings, J.; Peng, B.; Petrone, A.; Henderson, T.; Ranasinghe, D.; Zakrzewski, V. G.; Gao, J.; Rega, N.; Zheng, G.; Liang, W.; Hada, M.; Ehara, M.; Toyota, K.; Fukuda, R.; Hasegawa, J.; Ishida, M.; Nakajima, T.; Honda, Y.; Kitao, O.; Nakai, H.; Vreven, T.; Throssell, K.; Montgomery, J. A.; Peralta, J. E.; Ogliaro, F.; Bearpark, M. J.; Heyd, J. J.; Brothers, E. N.; Kudin, N.; Staroverov, V. N.; Keith, T. A.; Kobayashi, R.; Normand, J.; Raghavachari, K.; Rendell, A. P.; Burant, J. C.; Iyengar, S. S.; Tomasi, J.; Cossi, M.; Millam, J. M.; Klene, M.; Adamo, C.; Cammi, R.; Ochterski, J. W.; Martin, R. L.; Morokuma, K.; Farkas, O.; Foresman, J. B.; Fox, D. J. Gaussian, Inc., Wallingford CT, 2016.
4. Lee, C., Yang, W. & Parr, R. G. Development of the Colle-Salvetti correlation-energy formula into a functional of the electron density. *Phys. Rev. B*. **37**, 785-789 (1988).
5. Becke, A. D. Density-functional exchange-energy approximation with correct asymptotic behavior. *Phys. Rev. A*. **38**, 3098 (1988).
6. Miehlich, B., Savin, A., Stoll, H. & Preuss, H. Results obtained with the correlation energy density functionals of Becke and Lee, Yang and Parr. *Chem. Phys. Lett.* **157**, 200-206 (1989).

7. Becke, A. D. Density-functional thermochemistry. III. The role of exact exchange. *J. Chem. Phys.* **98**, 5648-5652 (1993).
8. Grimme, S., Antony, S., Ehrlich, S. & Krieg, S. A consistent and accurate ab initio parametrization of density functional dispersion correction (dft-d) for the 94 elements H-Pu. *J. Chem. Phys.* **132**, 154104 (2010).
9. Roy, L. E., Hay, P. J. & Martin, R. L. Revised basis sets for the LANL effective core potentials. *J. Chem. Theory Comput.* **4**, 1029-1031 (2008).
10. Zhao, Y. & Truhlar, D. G. A new local density functional for main-group thermochemistry, transition metal bonding, thermochemical kinetics, and noncovalent interactions. *J. Chem. Phys.* **125**, 194101 (2006).
11. Marenich, A. V., Cramer, C. J. & Truhlar, D. G. Universal solvation model based on solute electron density and on a continuum model of the solvent defined by the bulk dielectric constant and atomic surface tensions. *J. Phys. Chem. B.* **113**, 6378-6396 (2009).
12. Weaver, J. H. & Frederikse, H. P. R. Crc handbook of chemistry and physics. *CRC Press. Boca Raton.* **76**, 12-156 (1977).
13. Chai, J.-D. & Head-Gordon, M. Long-range corrected hybrid density functionals with damped atom-atom dispersion corrections. *Phys. Chem. Chem. Phys.* **10**, 6615-6620 (2008).
14. Li, H. & Hall, M. B. Role of the chemically con-innocent ligand in the catalytic formation of hydrogen and carbon dioxide from methanol and water with the metal as the spectator. *J. Am. Chem. Soc.* **137**, 12330-12342 (2015).
15. Jiang, Y.-Y., Yan, L., Yu, H.-Z., Zhang, Q. & Fu, Y. Mechanism of vanadium-catalyzed selective C-O and C-C cleavage of lignin model compound. *ACS Catal.* **6**, 4399-4410 (2016).
16. Yu, J.-L., Zhang, S.-Q. & Hong, X. Mechanisms and origins of chemo- and regioselectivities of Ru(II)-catalyzed decarboxylative C-H alkenylation of aryl

carboxylic acids with alkynes: A computational study. *J. Am. Chem. Soc.* **139**, 7224-7243 (2017).

17. Legault, C. Y. CYLview, 1.0b, Universite de Sherbrooke: Quebec, Canada, 2009; <http://www.cylview.org>.
